# Supplementary material for: Identifying key genes for European canker resistance in apple: machine learning and gene expression profiling of quantitative disease resistance
Source: Sci Rep. 2025 Dec 27;16:3419. doi: 10.1038/s41598-025-33478-6 (PMC12835272; doi:10.1038/s41598-025-33478-6)
Supplement: Supplementary file 1 — Supplementary Material 1 [file 41598_2025_33478_MOESM1_ESM.xlsx]

## Sheet: Table S1
Supplementary table 1. Differentially expressed genes from within-group and between-group comparisons of a bulk of partially Bulk-R (bulk-R) and Bulk-S (bulk-S) apple genotypes
Type of comparison	Significant contrast	Gene ID GDDH13_v1.1	Chromosome	start	end	strand	logFC	AveExpr	t	P.Value	adj.P.Val	B	Predicted gene function from GDDH13_v1.1	Predicted gene function from eggNOG	Only DE in bulk-R	Only DE in bulk-S	eggNOG annotated KEGG term	eggNOG annotated PFAM term	DE in 'Golden Delicious' Infected vs 'Golden Delicious' Control
Within-group	Bulk-R_Infected_vs_Control	MD17G1151800	Chr17	14061823	14063339	-	9.78129	3.3657	5.88575	6.67305e-08	6.33098e-07	7.93518	GDSL lipase 1	Belongs to the 'GDSL' lipolytic enzyme family	0	0	NA	Lipase_GDSL	Yes
Within-group	Bulk-R_Infected_vs_Control	MD01G1070400	Chr01	17470583	17472989	-	9.74387	4.15136	7.41483	6.38563e-11	1.64743e-09	14.5997	ACC synthase 1	1-aminocyclopropane-1-carboxylate synthase	0	0	ko00270,ko01100,ko01110,ko04016,map00270,map01100,map01110,map04016	Aminotran_1_2	Yes
Within-group	Bulk-R_Infected_vs_Control	MD11G1074400	Chr11	6312586	6314406	-	9.41697	3.88025	6.61952	2.52342e-09	3.78128e-08	11.0597	2-oxoglutarate (2OG) and Fe(II)-dependent oxygenase superfamily protein	NA	0	0	NA	NA	Yes
Within-group	Bulk-R_Infected_vs_Control	MD03G1091900	Chr03	7684976	7686913	+	9.35651	5.75021	7.88507	6.96004e-12	2.47169e-10	16.739	Glucose-methanol-choline (GMC) oxidoreductase family protein	(R)-mandelonitrile lyase	0	0	ko00460,ko01110,map00460,map01110	GMC_oxred_C,GMC_oxred_N	Yes
Within-group	Bulk-R_Infected_vs_Control	MD15G1145600	Chr15	10827825	10829235	+	9.31902	5.27226	5.96149	4.79005e-08	4.7697e-07	8.17897	Zinc-binding dehydrogenase family protein	2-alkenal reductase (NADP( )-dependent)-like	0	0	NA	ADH_N_2,ADH_zinc_N	Yes
Within-group	Bulk-R_Infected_vs_Control	MD11G1287900	Chr11	40768222	40769541	-	9.30835	7.38977	12.6342	1.1678e-21	2.1948e-18	38.8127	Eukaryotic aspartyl protease family protein	Belongs to the peptidase A1 family	0	0	NA	TAXi_C,TAXi_N	Yes
Within-group	Bulk-R_Infected_vs_Control	MD04G1111600	Chr04	19729018	19731685	+	9.20505	4.17814	4.58158	1.476e-05	6.81677e-05	2.76747	Glutathione S-transferase family protein	Glutathione S-transferase	0	0	ko00480,ko00980,ko00982,ko00983,ko01524,ko05200,ko05204,ko05225,ko05418,map00480,map00980,map00982,map00983,map01524,map05200,map05204,map05225,map05418	GST_C_2,GST_N_3	Yes
Within-group	Bulk-R_Infected_vs_Control	MD07G1308000	Chr07	36397640	36401747	-	9.13178	3.47115	4.73747	8.02124e-06	4.00344e-05	3.35985	Laccase/Diphenol oxidase family protein	Lignin degradation and detoxification of lignin-derived products	0	0	NA	Cu-oxidase,Cu-oxidase_2,Cu-oxidase_3	Yes
Within-group	Bulk-R_Infected_vs_Control	MD07G1255000	Chr07	32220370	32222675	-	9.12571	4.82788	8.56437	2.73642e-13	1.60378e-11	19.8833	Plant invertase/pectin methylesterase inhibitor superfamily	Acts in the modification of cell walls via demethylesterification of cell wall pectin	0	0	ko00040,ko01100,map00040,map01100	PMEI,Pectinesterase	Yes
Within-group	Bulk-R_Infected_vs_Control	MD05G1074000	Chr05	15575255	15576707	+	9.10377	5.76638	6.02394	3.63989e-08	3.76946e-07	8.4122	2-oxoglutarate (2OG) and Fe(II)-dependent oxygenase superfamily protein	Belongs to the iron ascorbate-dependent oxidoreductase family	0	0	NA	2OG-FeII_Oxy,DIOX_N	Yes
Within-group	Bulk-R_Infected_vs_Control	MD16G1191900	Chr16	16955726	16969515	+	8.9983	4.08808	7.21093	1.65528e-10	3.75801e-09	13.6806	Copper amine oxidase family protein	amine oxidase	0	0	ko00260,ko00350,ko00360,ko00410,ko00950,ko00960,ko01100,ko01110,map00260,map00350,map00360,map00410,map00950,map00960,map01100,map01110	Cu_amine_oxid,Cu_amine_oxidN2,Cu_amine_oxidN3	Yes
Within-group	Bulk-R_Infected_vs_Control	MD03G1251400	Chr03	33912007	33912633	+	8.83375	8.07717	9.17849	1.44126e-14	1.42592e-12	22.6146	Kunitz family trypsin and protease inhibitor protein	alpha-amylase subtilisin	0	0	NA	Kunitz_legume	Yes
Within-group	Bulk-R_Infected_vs_Control	MD10G1022900	Chr10	2873448	2874602	-	8.70113	8.87839	13.1168	1.29179e-22	3.48268e-19	40.9654	RmlC-like cupins superfamily protein	germin-like protein	0	0	NA	Cupin_1	Yes
Within-group	Bulk-R_Infected_vs_Control	MD17G1001500	Chr17	91553	93431	-	8.52793	2.66963	7.56636	3.13487e-11	8.89643e-10	15.2732	WRKY DNA-binding protein 75	WRKY transcription factor	0	0	NA	WRKY	Yes
Within-group	Bulk-R_Infected_vs_Control	MD03G1090900	Chr03	7527522	7529143	+	8.52026	5.13603	6.42586	6.06624e-09	7.9714e-08	10.162	Glucose-methanol-choline (GMC) oxidoreductase family protein	(R)-mandelonitrile lyase	0	0	ko00460,ko01110,map00460,map01110	GMC_oxred_C,GMC_oxred_N	Yes
Within-group	Bulk-R_Infected_vs_Control	MD16G1149400	Chr16	11765756	11770164	+	8.51379	6.40424	9.61513	1.77326e-15	2.58417e-13	24.7907	Protein of unknown function	Desiccation-related protein PCC13-62-like	0	0	NA	Ferritin_2	Yes
Within-group	Bulk-R_Infected_vs_Control	MD04G1229400	Chr04	30970926	30971668	+	8.49209	0.415037	8.12724	2.20381e-12	9.15246e-11	17.7325	myb domain protein 15	Myb-like DNA-binding domain	0	0	NA	Myb_DNA-binding	Yes
Within-group	Bulk-R_Infected_vs_Control	MD07G1020300	Chr07	1726059	1729658	-	8.48588	1.94411	4.29103	4.46228e-05	0.000180658	1.79227	NAD(P)-binding Rossmann-fold superfamily protein	NA	0	0	NA	NA	Yes
Within-group	Bulk-R_Infected_vs_Control	MD09G1256000	Chr09	32764599	32765757	-	8.45839	7.13889	7.76719	1.21593e-11	3.94957e-10	15.9977	Pathogenesis-related thaumatin superfamily protein	Thaumatin-like protein	0	0	NA	Thaumatin	Yes
Within-group	Bulk-R_Infected_vs_Control	MD03G1091800	Chr03	7626805	7627522	+	8.45705	3.79082	5.63182	2.00266e-07	1.6324e-06	6.85017	Glucose-methanol-choline (GMC) oxidoreductase family protein	NA	0	0	NA	NA	Yes
Within-group	Bulk-R_Infected_vs_Control	MD17G1125800	Chr17	10995011	10998283	-	8.44014	3.69317	6.6512	2.18443e-09	3.33825e-08	11.192	UDP-Glycosyltransferase superfamily protein	UDP-Glycosyltransferase	0	0	NA	UDPGT	Yes
Within-group	Bulk-R_Infected_vs_Control	MD14G1207600	Chr14	29464497	29465903	+	8.43442	6.96917	9.79802	7.37792e-16	1.25996e-13	25.6291	2-oxoglutarate (2OG) and Fe(II)-dependent oxygenase superfamily protein	Belongs to the iron ascorbate-dependent oxidoreductase family	0	0	NA	2OG-FeII_Oxy,DIOX_N	Yes
Within-group	Bulk-R_Infected_vs_Control	MD16G1149300	Chr16	11755682	11757576	+	8.41144	8.38948	13.0129	2.0704e-22	5.15244e-19	40.5034	Protein of unknown function	Desiccation-related protein PCC13-62-like	0	0	NA	Ferritin_2	Yes
Within-group	Bulk-R_Infected_vs_Control	MD16G1056600	Chr16	4054837	4056867	-	8.38708	4.49156	5.90582	6.11269e-08	5.8647e-07	7.94802	cytochrome P450	cytochrome P450	0	0	ko00905,map00905	p450	Yes
Within-group	Bulk-R_Infected_vs_Control	MD05G1105800	Chr05	21914306	21917664	-	8.36909	3.88422	3.01577	0.0033298	0.0078096	-2.31295	beta glucosidase 17	Belongs to the glycosyl hydrolase 1 family	0	0	ko00460,ko00500,ko00940,ko01100,ko01110,map00460,map00500,map00940,map01100,map01110	Glyco_hydro_1	Yes
Within-group	Bulk-R_Infected_vs_Control	MD05G1266200	Chr05	40098428	40100056	+	8.32428	3.49406	3.48888	0.000752313	0.00214534	-0.930011	FAD-binding Berberine family protein	Belongs to the oxygen-dependent FAD-linked oxidoreductase family	0	0	NA	BBE,FAD_binding_4	Yes
Within-group	Bulk-R_Infected_vs_Control	MD01G1090400	Chr01	20496060	20497576	-	8.32386	1.79321	4.97074	3.1572e-06	1.77515e-05	4.28549	O-methyltransferase 1	Belongs to the class I-like SAM-binding methyltransferase superfamily. Cation-independent O- methyltransferase family	0	0	ko00940,ko01058,ko01100,ko01110,map00940,map01058,map01100,map01110	Dimerisation,Methyltransf_2	Yes
Within-group	Bulk-R_Infected_vs_Control	MD14G1141200	Chr14	23136746	23139303	-	8.28596	2.21114	3.88946	0.000191912	0.000646878	0.414666	2-oxoglutarate (2OG) and Fe(II)-dependent oxygenase superfamily protein	Belongs to the iron ascorbate-dependent oxidoreductase family	0	0	NA	2OG-FeII_Oxy,DIOX_N	Yes
Within-group	Bulk-R_Infected_vs_Control	MD02G1207900	Chr02	21040949	21043054	+	8.26546	2.92676	4.99682	2.84069e-06	1.61885e-05	4.34605	Plant invertase/pectin methylesterase inhibitor superfamily	Acts in the modification of cell walls via demethylesterification of cell wall pectin	0	0	ko00040,ko01100,map00040,map01100	PMEI,Pectinesterase	Yes
Within-group	Bulk-R_Infected_vs_Control	MD10G1132600	Chr10	21371497	21372279	+	8.18685	2.32333	4.10801	8.76768e-05	0.000326788	1.13415	NAD(P)-binding Rossmann-fold superfamily protein	Short-chain type dehydrogenase	0	0	ko00061,ko00333,ko00780,ko01040,ko01100,ko01130,ko01212,map00061,map00333,map00780,map01040,map01100,map01130,map01212	adh_short_C2	Yes
Within-group	Bulk-R_Infected_vs_Control	MD14G1141000	Chr14	23111875	23113865	-	8.18262	2.35774	3.69823	0.000372717	0.0011581	-0.204695	2-oxoglutarate (2OG) and Fe(II)-dependent oxygenase superfamily protein	Belongs to the iron ascorbate-dependent oxidoreductase family	0	0	NA	2OG-FeII_Oxy,DIOX_N	Yes
Within-group	Bulk-R_Infected_vs_Control	MD04G1019600	Chr04	2310854	2312278	-	8.13896	2.52423	4.26571	4.90439e-05	0.000196273	1.65305	indole-3-acetate beta-D-glucosyltransferase	Belongs to the UDP-glycosyltransferase family	0	0	NA	UDPGT	Yes
Within-group	Bulk-R_Infected_vs_Control	MD09G1142800	Chr09	11148530	11150084	+	8.11052	4.94655	8.89782	5.53978e-14	4.26721e-12	21.4421	UDP-glucosyl transferase 85A2	NA	0	0	NA	NA	Yes
Within-group	Bulk-R_Infected_vs_Control	MD00G1012900	Chr00	1595454	1602451	-	8.10411	2.14234	4.6713	1.0405e-05	5.02946e-05	3.13851	Glucose-methanol-choline (GMC) oxidoreductase family protein	(R)-mandelonitrile lyase	0	0	ko00460,ko01110,map00460,map01110	GMC_oxred_C,GMC_oxred_N	Yes
Within-group	Bulk-R_Infected_vs_Control	MD03G1091100	Chr03	7562926	7565784	+	8.07662	5.15116	7.69084	1.74382e-11	5.43509e-10	15.8316	Glucose-methanol-choline (GMC) oxidoreductase family protein	(R)-mandelonitrile lyase	0	0	ko00460,ko01110,map00460,map01110	GMC_oxred_C,GMC_oxred_N	Yes
Within-group	Bulk-R_Infected_vs_Control	MD12G1211500	Chr12	29021547	29024827	-	8.06621	3.21399	2.49419	0.0144471	0.0280111	-3.57695	beta glucosidase 13	Belongs to the glycosyl hydrolase 1 family	0	0	ko00460,ko00500,ko00940,ko01100,ko01110,map00460,map00500,map00940,map01100,map01110	Glyco_hydro_1	Yes
Within-group	Bulk-R_Infected_vs_Control	MD01G1212900	Chr01	30632228	30633136	-	8.06122	4.60514	5.31718	7.59084e-07	5.14301e-06	5.48128	chitinase A	Belongs to the glycosyl hydrolase 18 family	0	0	ko00520,ko01100,map00520,map01100	Glyco_hydro_18	Yes
Within-group	Bulk-R_Infected_vs_Control	MD05G1065200	Chr05	11795645	11797317	-	8.05734	1.75285	5.6566	1.80059e-07	1.48984e-06	6.99631	alpha/beta-Hydrolases superfamily protein	Alpha/beta hydrolase family	0	0	NA	Abhydrolase_1	Yes
Within-group	Bulk-R_Infected_vs_Control	MD08G1016600	Chr08	1281705	1283306	-	8.05413	6.01861	9.40753	4.80137e-15	5.88386e-13	23.8251	glyoxal oxidase-related protein	Galactose oxidase-like	0	0	NA	DUF1929,Glyoxal_oxid_N	Yes
Within-group	Bulk-R_Infected_vs_Control	MD04G1047700	Chr04	5550158	5551289	+	8.0386	7.43283	7.13246	2.38427e-10	5.14239e-09	13.0375	homolog of carrot EP3-3 chitinase	chitinase	0	0	ko00520,ko01100,map00520,map01100	Chitin_bind_1,Glyco_hydro_19	Yes
Within-group	Bulk-R_Infected_vs_Control	MD13G1208400	Chr13	19147665	19148254	+	8.02772	4.94634	4.66726	1.05709e-05	5.09521e-05	2.93078	Serine protease inhibitor	NA	0	0	NA	NA	Yes
Within-group	Bulk-R_Infected_vs_Control	MD05G1074200	Chr05	15601515	15607421	+	8.02525	3.84931	5.83529	8.31478e-08	7.6377e-07	7.67345	2-oxoglutarate (2OG) and Fe(II)-dependent oxygenase superfamily protein	Belongs to the iron ascorbate-dependent oxidoreductase family	0	0	NA	2OG-FeII_Oxy,DIOX_N	Yes
Within-group	Bulk-R_Infected_vs_Control	MD08G1105500	Chr08	8999343	9001268	-	8.01561	1.97946	2.99952	0.0034954	0.00814662	-2.2456	phospholipase A 2A	Lipolytic acyl hydrolase (LAH)	0	0	NA	Patatin	Yes
Within-group	Bulk-R_Infected_vs_Control	MD04G1223200	Chr04	30343250	30345154	-	7.97962	2.68049	4.80994	6.01887e-06	3.11556e-05	3.64031	NAD(P)-linked oxidoreductase superfamily protein	aldo-keto reductase	0	0	NA	Aldo_ket_red	Yes
Within-group	Bulk-R_Infected_vs_Control	MD05G1017100	Chr05	3002550	3011445	+	7.97453	2.32828	5.08139	2.01283e-06	1.19594e-05	4.68889	pathogenesis-related family protein	Pathogen-related protein-like	0	0	NA	NA	Yes
Within-group	Bulk-R_Infected_vs_Control	MD06G1141800	Chr06	28519571	28521212	-	7.9612	2.82241	5.54864	2.85761e-07	2.23308e-06	6.531	HCP-like superfamily protein with MYND-type zinc finger	f-box protein	0	0	NA	Sel1,zf-MYND	Yes
Within-group	Bulk-R_Infected_vs_Control	MD02G1180300	Chr02	16058335	16061924	+	7.94979	3.01078	6.09228	2.69186e-08	2.9e-07	8.79282	Auxin-responsive GH3 family protein	Indole-3-acetic acid-amido synthetase	0	0	ko04075,map04075	GH3	Yes
Within-group	Bulk-R_Infected_vs_Control	MD10G1172100	Chr10	26448956	26449772	-	7.94482	2.13616	5.33209	7.13189e-07	4.8801e-06	5.6866	glutathione S-transferase tau 7	Glutathione S-transferase	0	0	ko00480,ko00980,ko00982,ko00983,ko01524,ko05200,ko05204,ko05225,ko05418,map00480,map00980,map00982,map00983,map01524,map05200,map05204,map05225,map05418	GST_C,GST_N	Yes
Within-group	Bulk-R_Infected_vs_Control	MD11G1269300	Chr11	38504739	38505383	-	7.9165	2.23965	2.84792	0.00545005	0.0120133	-2.66181	Kunitz family trypsin and protease inhibitor protein	alpha-amylase subtilisin	0	0	NA	Kunitz_legume	Yes
Within-group	Bulk-R_Infected_vs_Control	MD16G1109500	Chr16	7681200	7687190	-	7.91324	2.04215	4.9828	3.00682e-06	1.70362e-05	4.3208	multidrug resistance-associated protein 3	ABC transporter C family member	0	0	ko01523,ko01524,ko02010,ko04071,ko04976,ko04977,ko05206,map01523,map01524,map02010,map04071,map04976,map04977,map05206	ABC_membrane,ABC_tran	Yes
Within-group	Bulk-R_Infected_vs_Control	MD14G1140400	Chr14	23046375	23048624	-	7.90861	3.16835	3.93616	0.000162684	0.000560506	0.498946	2-oxoglutarate (2OG) and Fe(II)-dependent oxygenase superfamily protein	Belongs to the iron ascorbate-dependent oxidoreductase family	0	0	NA	2OG-FeII_Oxy,DIOX_N	Yes
Within-group	Bulk-R_Infected_vs_Control	MD08G1232200	Chr08	29874746	29877673	+	7.88249	4.39188	2.93412	0.00424167	0.00965635	-2.64065	RmlC-like cupins superfamily protein	11S globulin seed storage protein	0	0	NA	Cupin_1	Yes
Within-group	Bulk-R_Infected_vs_Control	MD03G1091700	Chr03	7624691	7626803	+	7.87155	2.49501	4.85019	5.12652e-06	2.71534e-05	3.80035	Glucose-methanol-choline (GMC) oxidoreductase family protein	(R)-mandelonitrile lyase	0	0	ko00460,ko01110,map00460,map01110	GMC_oxred_C,GMC_oxred_N	Yes
Within-group	Bulk-R_Infected_vs_Control	MD08G1240600	Chr08	30666877	30668661	-	7.85017	5.31349	6.64018	2.29688e-09	3.48049e-08	11.069	NAD(P)-linked oxidoreductase superfamily protein	aldo-keto reductase	0	0	NA	Aldo_ket_red	Yes
Within-group	Bulk-R_Infected_vs_Control	MD15G1349000	Chr15	41348202	41349446	+	7.83405	4.71977	6.97822	4.87103e-10	9.35793e-09	12.5838	GDSL-like Lipase/Acylhydrolase superfamily protein	Belongs to the 'GDSL' lipolytic enzyme family	0	0	NA	Lipase_GDSL	Yes
Within-group	Bulk-R_Infected_vs_Control	MD09G1256300	Chr09	32800364	32802056	-	7.81127	8.52307	9.52216	2.76999e-15	3.78121e-13	24.1879	Pathogenesis-related thaumatin superfamily protein	Thaumatin-like protein	0	0	NA	Thaumatin	Yes
Within-group	Bulk-R_Infected_vs_Control	MD15G1187300	Chr15	14795676	14800000	+	7.79694	5.6103	8.20798	1.50042e-12	6.84651e-11	18.204	aldehyde dehydrogenase 2C4	Aldehyde dehydrogenase family	0	0	ko00010,ko00053,ko00071,ko00280,ko00310,ko00330,ko00340,ko00380,ko00410,ko00561,ko00620,ko00625,ko00903,ko00940,ko00981,ko01100,ko01110,ko01120,ko01130,map00010,map00053,map00071,map00280,map00310,map00330,map00340,map00380,map00410,map00561,map00620,map00625,map00903,map00940,map00981,map01100,map01110,map01120,map01130	Aldedh	Yes
Within-group	Bulk-R_Infected_vs_Control	MD15G1401300	Chr15	50230981	50234845	-	7.7827	6.0399	7.28854	1.15272e-10	2.74818e-09	13.9198	12-oxophytodienoate reductase 2	12-oxophytodienoate reductase	0	0	ko00592,ko01100,ko01110,map00592,map01100,map01110	Oxidored_FMN	Yes
Within-group	Bulk-R_Infected_vs_Control	MD14G1232100	Chr14	31236477	31237676	+	7.74745	5.97061	11.2123	8.77455e-19	4.65368e-16	32.2799	glutathione S-transferase TAU 8	glutathione S-transferase	0	0	ko00480,ko00980,ko00982,ko00983,ko01524,ko05200,ko05204,ko05225,ko05418,map00480,map00980,map00982,map00983,map01524,map05200,map05204,map05225,map05418	GST_C,GST_C_2,GST_N	Yes
Within-group	Bulk-R_Infected_vs_Control	MD16G1160500	Chr16	13069155	13070015	-	7.7426	5.91032	6.03624	3.44784e-08	3.59705e-07	8.33729	MLP-like protein 423	Major allergen Pru	0	0	NA	Bet_v_1	Yes
Within-group	Bulk-R_Infected_vs_Control	MD14G1196700	Chr14	28696209	28697816	+	7.71526	2.86565	4.19975	6.26302e-05	0.000243097	1.41573	Galactose mutarotase-like superfamily protein	Converts alpha-aldose to the beta-anomer	0	0	ko00010,ko00052,ko01100,ko01110,ko01120,ko01130,map00010,map00052,map01100,map01110,map01120,map01130	Aldose_epim	No
Within-group	Bulk-R_Infected_vs_Control	MD12G1240000	Chr12	31225541	31227462	-	7.6763	4.09515	6.42586	6.06627e-09	7.9714e-08	10.1873	NAD(P)-linked oxidoreductase superfamily protein	aldo-keto reductase	0	0	NA	Aldo_ket_red	Yes
Within-group	Bulk-R_Infected_vs_Control	MD16G1160300	Chr16	13047363	13048197	-	7.66998	3.1066	3.46876	0.000803715	0.00227129	-0.993164	MLP-like protein 423	Major allergen Pru	0	0	NA	Bet_v_1	No
Within-group	Bulk-R_Infected_vs_Control	MD01G1042800	Chr01	14102650	14104428	-	7.65758	3.68609	5.46241	4.12123e-07	3.03852e-06	6.13708	elicitor-activated gene 3-1	Dehydrogenase	0	0	ko00940,ko01100,ko01110,map00940,map01100,map01110	ADH_N,ADH_zinc_N	Yes
Within-group	Bulk-R_Infected_vs_Control	MD14G1084000	Chr14	10195517	10197263	-	7.65692	5.085	7.02738	3.88081e-10	7.70993e-09	12.7672	S-adenosyl-L-methionine-dependent methyltransferases superfamily protein	Methyltransferase	0	0	NA	Methyltransf_11	Yes
Within-group	Bulk-R_Infected_vs_Control	MD03G1281500	Chr03	36239416	36241840	+	7.64851	5.85772	11.2909	6.05498e-19	3.62761e-16	32.641	cytochrome P450	Belongs to the cytochrome P450 family	0	0	ko00140,ko00380,ko00590,ko00591,ko00830,ko00905,ko00943,ko00980,ko01100,ko01110,ko04212,ko04726,ko04750,ko04913,ko04917,ko04927,ko04934,ko05204,map00140,map00380,map00590,map00591,map00830,map00905,map00943,map00980,map01100,map01110,map04212,map04726,map04750,map04913,map04917,map04927,map04934,map05204	p450	Yes
Within-group	Bulk-R_Infected_vs_Control	MD12G1240300	Chr12	31239362	31241481	-	7.59415	6.74418	12.0472	1.75649e-20	1.722e-17	36.1363	NAD(P)-linked oxidoreductase superfamily protein	aldo-keto reductase	0	0	NA	Aldo_ket_red	Yes
Within-group	Bulk-R_Infected_vs_Control	MD17G1179900	Chr17	20892363	20893013	+	7.55396	4.91326	8.19736	1.5783e-12	7.12149e-11	18.1703	Protein of unknown function	NA	0	0	NA	NA	Yes
Within-group	Bulk-R_Infected_vs_Control	MD02G1228800	Chr02	27110155	27115346	-	7.55029	3.13302	5.49838	3.53846e-07	2.67281e-06	6.30888	nitrate transporter 1.5	POT family	0	0	NA	PTR2	Yes
Within-group	Bulk-R_Infected_vs_Control	MD04G1142300	Chr04	23149505	23152333	+	7.52145	7.05652	9.86628	5.31939e-16	9.56072e-14	25.8892	laccase 7	Belongs to the multicopper oxidase family	0	0	NA	Cu-oxidase,Cu-oxidase_2,Cu-oxidase_3	Yes
Within-group	Bulk-R_Infected_vs_Control	MD04G1019400	Chr04	2259296	2260720	-	7.49537	3.87854	7.34275	8.94806e-11	2.20983e-09	14.2705	indole-3-acetate beta-D-glucosyltransferase	Belongs to the UDP-glycosyltransferase family	0	0	NA	UDPGT	Yes
Within-group	Bulk-R_Infected_vs_Control	MD15G1132000	Chr15	9566776	9568423	-	7.48527	3.45593	5.44151	4.50183e-07	3.27582e-06	6.0618	Chalcone and stilbene synthase family protein	Belongs to the chalcone stilbene synthases family	0	0	ko00941,ko01100,ko01110,ko04712,map00941,map01100,map01110,map04712	Chal_sti_synt_C,Chal_sti_synt_N	Yes
Within-group	Bulk-R_Infected_vs_Control	MD10G1091900	Chr10	13902028	13902966	-	7.46372	2.92866	4.71011	8.93448e-06	4.39885e-05	3.21742	alpha/beta-Hydrolases superfamily protein	Carboxylesterase	0	0	NA	Abhydrolase_3	Yes
Within-group	Bulk-R_Infected_vs_Control	MD07G1261900	Chr07	33135037	33136694	+	7.44162	5.17472	6.97641	4.91194e-10	9.41417e-09	12.5534	GroES-like zinc-binding alcohol dehydrogenase family protein	Sorbitol dehydrogenase-like	0	0	ko00040,ko00051,ko01100,map00040,map00051,map01100	ADH_N,ADH_zinc_N	No
Within-group	Bulk-R_Infected_vs_Control	MD08G1195600	Chr08	25225526	25227571	+	7.43134	2.44385	3.09883	0.00259133	0.00626708	-2.04952	Plant invertase/pectin methylesterase inhibitor superfamily	pectinesterase pectinesterase inhibitor	0	0	ko00040,ko01100,map00040,map01100	PMEI,Pectinesterase	No
Within-group	Bulk-R_Infected_vs_Control	MD13G1161000	Chr13	12634119	12634602	+	7.37899	0.849519	5.68158	1.61721e-07	1.3565e-06	7.0978	Major allergen Mal d 1	NA	0	0	NA	NA	Yes
Within-group	Bulk-R_Infected_vs_Control	MD13G1057000	Chr13	3990668	3993203	-	7.37046	5.00174	6.94069	5.79238e-10	1.08761e-08	12.3546	Cytochrome P450 superfamily protein	Cytochrome p450	0	0	ko00905,map00905	p450	Yes
Within-group	Bulk-R_Infected_vs_Control	MD15G1348800	Chr15	41327111	41332181	+	7.34406	6.69466	11.0674	1.73958e-18	8.65831e-16	31.5692	GDSL-like Lipase/Acylhydrolase superfamily protein	Belongs to the 'GDSL' lipolytic enzyme family	0	0	NA	Lipase_GDSL	Yes
Within-group	Bulk-R_Infected_vs_Control	MD02G1011100	Chr02	714346	716060	+	7.33098	2.32172	4.57225	1.53033e-05	7.03258e-05	2.73318	Glycosyl hydrolase family protein with chitinase insertion domain	Glyco_18	0	0	ko00520,ko01100,map00520,map01100	Glyco_hydro_18	No
Within-group	Bulk-R_Infected_vs_Control	MD01G1213000	Chr01	30633237	30637541	+	7.31401	1.82134	4.76158	7.292e-06	3.67806e-05	3.46134	plastidic pyruvate kinase beta subunit 1	Pyruvate kinase	0	0	ko00010,ko00230,ko00620,ko01100,ko01110,ko01120,ko01130,ko01200,ko01230,ko04922,ko04930,ko05165,ko05203,ko05230,map00010,map00230,map00620,map01100,map01110,map01120,map01130,map01200,map01230,map04922,map04930,map05165,map05203,map05230	PK,PK_C	Yes
Within-group	Bulk-R_Infected_vs_Control	MD04G1018400	Chr04	2116730	2117944	-	7.3127	7.1306	8.28151	1.05683e-12	5.02062e-11	18.3245	Pathogenesis-related thaumatin superfamily protein	Thaumatin-like protein	0	0	NA	Thaumatin	Yes
Within-group	Bulk-R_Infected_vs_Control	MD06G1077500	Chr06	19222869	19224715	+	7.30293	6.05142	9.18118	1.42278e-14	1.41196e-12	22.7243	NAD(P)-binding Rossmann-fold superfamily protein	Salutaridine reductase-like	0	0	ko00902,ko01110,map00902,map01110	adh_short,adh_short_C2	Yes
Within-group	Bulk-R_Infected_vs_Control	MD04G1229300	Chr04	30970183	30970924	+	7.28328	0.294425	8.17191	1.78166e-12	7.74735e-11	17.9656	myb domain protein 15	Myb-related protein	0	0	NA	Myb_DNA-binding	Yes
Within-group	Bulk-R_Infected_vs_Control	MD00G1145200	Chr00	31766072	31769520	-	7.27632	0.972196	2.78524	0.00651895	0.0140283	-2.75528	beta glucosidase 15	Belongs to the glycosyl hydrolase 1 family	0	0	ko00460,ko00500,ko00940,ko01100,ko01110,map00460,map00500,map00940,map01100,map01110	Glyco_hydro_1	No
Within-group	Bulk-R_Infected_vs_Control	MD16G1077700	Chr16	5438696	5444408	-	7.25562	1.90318	5.45696	4.21737e-07	3.09669e-06	6.17286	WRKY DNA-binding protein 72	WRKY transcription factor	0	0	NA	WRKY	Yes
Within-group	Bulk-R_Infected_vs_Control	MD08G1107500	Chr08	9432061	9432761	-	7.24397	2.30976	5.57076	2.60037e-07	2.04739e-06	6.61617	Cupredoxin superfamily protein	Plastocyanin-like domain protein	0	0	NA	Cu_bind_like	Yes
Within-group	Bulk-R_Infected_vs_Control	MD15G1348900	Chr15	41345118	41347925	+	7.23511	4.22299	6.77563	1.23709e-09	2.05348e-08	11.6801	alpha-fucosidase 1	Belongs to the 'GDSL' lipolytic enzyme family	0	0	NA	Lipase_GDSL	Yes
Within-group	Bulk-R_Infected_vs_Control	MD06G1077700	Chr06	19261585	19263369	+	7.23263	8.03781	12.1333	1.17795e-20	1.31411e-17	36.4693	NAD(P)-binding Rossmann-fold superfamily protein	Salutaridine reductase-like	0	0	ko00902,ko01110,map00902,map01110	adh_short,adh_short_C2	Yes
Within-group	Bulk-R_Infected_vs_Control	MD15G1028200	Chr15	1669684	1671770	+	7.23207	5.95183	10.6385	1.33087e-17	4.52829e-15	29.6072	cytochrome P450	cytochrome P450	0	0	NA	p450	Yes
Within-group	Bulk-R_Infected_vs_Control	MD06G1118700	Chr06	25741327	25744156	+	7.18687	5.58486	6.81155	1.04923e-09	1.78375e-08	11.7114	methionine gamma-lyase	Methionine gamma-lyase-like	0	0	ko00270,ko00450,map00270,map00450	Cys_Met_Meta_PP	Yes
Within-group	Bulk-R_Infected_vs_Control	MD04G1225400	Chr04	30525989	30526870	+	7.16768	8.76803	9.94319	3.6802e-16	7.17239e-14	26.1555	pathogenesis-related 4	Pathogenesis-related protein	0	0	NA	Barwin	Yes
Within-group	Bulk-R_Infected_vs_Control	MD02G1003300	Chr02	244303	246729	-	7.15396	3.3671	3.90691	0.000180448	0.000613543	0.365052	UDP-glucosyltransferase 74F2	Belongs to the UDP-glycosyltransferase family	0	0	ko00380,ko00966,ko01110,ko01210,map00380,map00966,map01110,map01210	UDPGT	Yes
Within-group	Bulk-R_Infected_vs_Control	MD15G1290900	Chr15	26870302	26873401	+	7.14236	0.842778	6.35711	8.2654e-09	1.04454e-07	9.93264	Auxin-responsive GH3 family protein	Indole-3-acetic acid-amido synthetase	0	0	ko04075,map04075	GH3	Yes
Within-group	Bulk-R_Infected_vs_Control	MD02G1162200	Chr02	13685248	13691212	+	7.1414	0.644171	6.3333	9.19757e-09	1.14358e-07	9.83038	methyl esterase 3	Salicylic acid-binding protein 2-like	0	0	NA	Abhydrolase_1,Abhydrolase_6	Yes
Within-group	Bulk-R_Infected_vs_Control	MD10G1053000	Chr10	7070214	7071502	-	7.12746	3.31195	5.94045	5.253e-08	5.15454e-07	8.09221	2-oxoglutarate (2OG) and Fe(II)-dependent oxygenase superfamily protein	Belongs to the iron ascorbate-dependent oxidoreductase family	0	0	NA	2OG-FeII_Oxy,DIOX_N	Yes
Within-group	Bulk-R_Infected_vs_Control	MD00G1005300	Chr00	782936	783247	-	7.12622	0.745756	5.54041	2.95961e-07	2.30123e-06	6.52807	peptidoglycan-binding LysM domain-containing protein	LysM domain	0	0	NA	LysM	Yes
Within-group	Bulk-R_Infected_vs_Control	MD16G1122400	Chr16	8821613	8823564	-	7.12609	0.617211	12.137	1.15756e-20	1.31411e-17	35.8659	WRKY DNA-binding protein 75	WRKY transcription factor	0	0	NA	WRKY	Yes
Within-group	Bulk-R_Infected_vs_Control	MD05G1208700	Chr05	34069531	34071008	+	7.12071	5.2311	9.88778	4.79879e-16	8.87146e-14	26.0739	2-oxoglutarate (2OG) and Fe(II)-dependent oxygenase superfamily protein	NA	0	0	NA	NA	Yes
Within-group	Bulk-R_Infected_vs_Control	MD02G1091500	Chr02	7258831	7263247	-	7.1182	1.8356	3.79638	0.000265794	0.000862916	0.107978	methyl esterase 3	Salicylic acid-binding protein 2-like	0	0	NA	Abhydrolase_1,Abhydrolase_6	Yes
Within-group	Bulk-R_Infected_vs_Control	MD09G1280400	Chr09	35723456	35725685	-	7.11239	2.35429	3.14388	0.00225753	0.0055731	-1.91203	acyl activating enzyme 12	butyrate--CoA ligase AAE11, peroxisomal-like	0	0	NA	AMP-binding,AMP-binding_C	Yes
Within-group	Bulk-R_Infected_vs_Control	MD15G1170000	Chr15	13101827	13102677	-	7.09198	1.92406	2.98481	0.00365178	0.00846474	-2.32458	blue-copper-binding protein	Cucumber peeling cupredoxin-like	0	0	NA	Cu_bind_like	Yes
Within-group	Bulk-R_Infected_vs_Control	MD07G1281600	Chr07	34480057	34480710	+	7.08436	1.42598	5.32224	7.4319e-07	5.05018e-06	5.64089	Late embryogenesis abundant (LEA) hydroxyproline-rich glycoprotein family	Late embryogenesis abundant protein	0	0	NA	LEA_2	Yes
Within-group	Bulk-R_Infected_vs_Control	MD02G1095700	Chr02	7550266	7555530	+	7.08434	1.26265	6.20807	1.60989e-08	1.85879e-07	9.29331	cellulose synthase like E1	Belongs to the glycosyltransferase 2 family	0	0	NA	Cellulose_synt	Yes
Within-group	Bulk-R_Infected_vs_Control	MD04G1111400	Chr04	19618986	19621568	+	7.08017	7.94875	10.02	2.54743e-16	5.31705e-14	26.5502	Glutathione S-transferase family protein	Glutathione S-transferase	0	0	ko00480,ko00980,ko00982,ko00983,ko01524,ko05200,ko05204,ko05225,ko05418,map00480,map00980,map00982,map00983,map01524,map05200,map05204,map05225,map05418	GST_C_2,GST_N_3	Yes
Within-group	Bulk-R_Infected_vs_Control	MD03G1121900	Chr03	11351768	11354975	-	7.07683	1.18638	3.73166	0.000332378	0.00104847	-0.0855163	alpha carbonic anhydrase 7	Bifunctional monodehydroascorbate reductase and carbonic anhydrase nectarin-3-like	0	0	ko00910,map00910	Carb_anhydrase	Yes
Within-group	Bulk-R_Infected_vs_Control	MD01G1213100	Chr01	30637543	30654886	-	7.07251	9.9411	10.7481	7.90482e-18	2.9395e-15	29.9713	chitinase A	Belongs to the glycosyl hydrolase 18 family	0	0	ko00520,ko01100,map00520,map01100	Glyco_hydro_18	Yes
Within-group	Bulk-R_Infected_vs_Control	MD04G1204000	Chr04	29011559	29015516	-	7.06933	6.77725	9.94572	3.63587e-16	7.16553e-14	26.2804	lipoxygenase 1	Plant lipoxygenase may be involved in a number of diverse aspects of plant physiology including growth and development, pest resistance, and senescence or responses to wounding	0	0	ko00591,map00591	Lipoxygenase,PLAT	Yes
Within-group	Bulk-R_Infected_vs_Control	MD05G1267900	Chr05	40310860	40312455	+	7.06744	4.81593	4.06835	0.000101263	0.000370175	0.714204	FAD-binding Berberine family protein	Belongs to the oxygen-dependent FAD-linked oxidoreductase family	0	0	ko00940,ko01100,ko01110,map00940,map01100,map01110	BBE,FAD_binding_4	Yes
Within-group	Bulk-R_Infected_vs_Control	MD13G1101200	Chr13	7185510	7196576	-	7.03521	5.46632	8.07149	2.87307e-12	1.15676e-10	17.5496	NAD(P)-linked oxidoreductase superfamily protein	Non-functional NADPH-dependent codeinone reductase 2-like	0	0	ko00941,ko01110,map00941,map01110	Aldo_ket_red	Yes
Within-group	Bulk-R_Infected_vs_Control	MD02G1162000	Chr02	13637113	13637673	+	7.03155	0.197103	6.26659	1.23994e-08	1.47915e-07	9.54518	methyl esterase 1	Salicylic acid-binding protein 2-like	0	0	NA	Abhydrolase_1,Abhydrolase_6	Yes
Within-group	Bulk-R_Infected_vs_Control	MD08G1163300	Chr08	19215398	19216984	+	7.03039	3.75495	5.07384	2.07589e-06	1.22973e-05	4.55186	2-oxoglutarate (2OG) and Fe(II)-dependent oxygenase superfamily protein	Belongs to the iron ascorbate-dependent oxidoreductase family	0	0	NA	2OG-FeII_Oxy,DIOX_N	Yes
Within-group	Bulk-R_Infected_vs_Control	MD04G1142600	Chr04	23226261	23228683	+	7.02721	2.70307	3.87301	0.000203355	0.000680769	0.298202	laccase 7	Belongs to the multicopper oxidase family	0	0	NA	Cu-oxidase,Cu-oxidase_2,Cu-oxidase_3	Yes
Within-group	Bulk-R_Infected_vs_Control	MD15G1156100	Chr15	11598211	11599995	-	7.01945	4.56712	7.0589	3.35388e-10	6.81563e-09	12.936	Glycosyl hydrolase family protein with chitinase insertion domain	Glyco_18	0	0	ko00520,ko01100,map00520,map01100	Glyco_hydro_18	Yes
Within-group	Bulk-R_Infected_vs_Control	MD13G1208500	Chr13	19158946	19159520	+	7.01773	4.74384	4.92118	3.85636e-06	2.11424e-05	3.86417	Serine protease inhibitor	Potato inhibitor I family	0	0	NA	potato_inhibit	Yes
Within-group	Bulk-R_Infected_vs_Control	MD15G1131700	Chr15	9556180	9558141	-	6.98608	5.43093	7.64014	2.21485e-11	6.65936e-10	15.5164	Chalcone and stilbene synthase family protein	Belongs to the chalcone stilbene synthases family	0	0	ko00941,ko01100,ko01110,ko04712,map00941,map01100,map01110,map04712	Chal_sti_synt_C,Chal_sti_synt_N	Yes
Within-group	Bulk-R_Infected_vs_Control	MD13G1161200	Chr13	12656796	12663932	+	6.9638	6.10892	10.1085	1.66869e-16	3.65362e-14	27.052	MLP-like protein 423	Major allergen Pru	0	0	NA	Bet_v_1	Yes
Within-group	Bulk-R_Infected_vs_Control	MD04G1142900	Chr04	23253741	23256241	+	6.96041	2.76834	4.81205	5.96863e-06	3.0955e-05	3.59246	laccase 7	Belongs to the multicopper oxidase family	0	0	NA	Cu-oxidase,Cu-oxidase_2,Cu-oxidase_3	Yes
Within-group	Bulk-R_Infected_vs_Control	MD10G1238200	Chr10	33437479	33439002	+	6.94749	0.817262	5.34195	6.84354e-07	4.70868e-06	5.71915	NAC domain containing protein 42	Transcription factor JUNGBRUNNEN 1-like	0	0	NA	NAM	Yes
Within-group	Bulk-R_Infected_vs_Control	MD06G1224000	Chr06	35460814	35462683	-	6.94622	3.45874	3.89664	0.000187113	0.000633144	0.232511	S-adenosyl-L-methionine-dependent methyltransferases superfamily protein	S-adenosylmethionine-dependent methyltransferase	0	0	NA	Methyltransf_7	Yes
Within-group	Bulk-R_Infected_vs_Control	MD17G1119700	Chr17	10381360	10383445	+	6.91962	2.32352	3.78291	0.000278503	0.000898765	0.0319199	cinnamyl-alcohol dehydrogenase	Cinnamyl alcohol dehydrogenase	0	0	ko00940,ko01100,ko01110,map00940,map01100,map01110	ADH_N,ADH_zinc_N	No
Within-group	Bulk-R_Infected_vs_Control	MD01G1195500	Chr01	29383738	29385849	+	6.91252	0.937805	3.02238	0.00326459	0.00767501	-2.16125	GroES-like zinc-binding alcohol dehydrogenase family protein	Sorbitol dehydrogenase-like	0	0	ko00040,ko00051,ko01100,map00040,map00051,map01100	ADH_N,ADH_zinc_N	No
Within-group	Bulk-R_Infected_vs_Control	MD14G1145600	Chr14	23852813	23855571	-	6.9011	2.81544	6.77978	1.21379e-09	2.02206e-08	11.7594	Protein of unknown function	Encoded by	0	0	NA	SURNod19	Yes
Within-group	Bulk-R_Infected_vs_Control	MD06G1207200	Chr06	34176466	34177621	-	6.89945	2.17722	7.80142	1.03422e-11	3.4565e-10	16.351	NA	NA	0	0	NA	NA	Yes
Within-group	Bulk-R_Infected_vs_Control	MD00G1145300	Chr00	31807528	31810835	-	6.88305	0.874088	2.98071	0.00369652	0.00855497	-2.25317	beta glucosidase 17	Belongs to the glycosyl hydrolase 1 family	0	0	ko00460,ko00500,ko00940,ko01100,ko01110,map00460,map00500,map00940,map01100,map01110	Glyco_hydro_1	No
Within-group	Bulk-R_Infected_vs_Control	MD11G1231900	Chr11	33743312	33746221	+	6.86963	3.47305	5.42041	4.92122e-07	3.54512e-06	5.94684	FAD/NAD(P)-binding oxidoreductase family protein	Zeaxanthin epoxidase, chloroplastic-like	0	0	NA	FAD_binding_3	Yes
Within-group	Bulk-R_Infected_vs_Control	MD09G1111800	Chr09	8499478	8506556	-	6.86029	1.48083	5.89436	6.42675e-08	6.11165e-07	7.96717	chitin elicitor receptor kinase 1	Chitin elicitor receptor kinase	0	0	ko04626,map04626	LysM,Pkinase,Pkinase_Tyr	Yes
Within-group	Bulk-R_Infected_vs_Control	MD04G1046200	Chr04	5361812	5364129	-	6.84999	2.84013	6.08842	2.73824e-08	2.94213e-07	8.75001	Protein of unknown function	NA	0	0	NA	NA	Yes
Within-group	Bulk-R_Infected_vs_Control	MD13G1160900	Chr13	12630831	12631310	-	6.83641	1.26929	6.07257	2.93702e-08	3.12202e-07	8.71492	MLP-like protein 423	Major allergen Pru	0	0	NA	Bet_v_1	Yes
Within-group	Bulk-R_Infected_vs_Control	MD01G1042500	Chr01	14061561	14063571	-	6.8299	4.98001	6.98135	4.80125e-10	9.25133e-09	12.5574	elicitor-activated gene 3-1	Dehydrogenase	0	0	ko00940,ko01100,ko01110,map00940,map01100,map01110	ADH_N,ADH_zinc_N	Yes
Within-group	Bulk-R_Infected_vs_Control	MD11G1097500	Chr11	8083324	8086651	+	6.82987	1.13437	6.82031	1.00788e-09	1.72433e-08	11.944	Haloacid dehalogenase-like hydrolase (HAD) superfamily protein	Haloacid dehalogenase-like hydrolase	0	0	NA	HAD_2,Hydrolase_like	Yes
Within-group	Bulk-R_Infected_vs_Control	MD10G1023500	Chr10	2949863	2951029	-	6.81709	-1.18963	5.0729	2.08388e-06	1.23408e-05	4.71095	germin-like protein 2	Germin-like protein subfamily 1 member	0	0	NA	Cupin_1	Yes
Within-group	Bulk-R_Infected_vs_Control	MD09G1008800	Chr09	616602	619344	+	6.797	3.89926	11.8056	5.4138e-20	4.60914e-17	34.9138	WRKY DNA-binding protein 75	WRKY transcription factor	0	0	NA	WRKY	Yes
Within-group	Bulk-R_Infected_vs_Control	MD05G1267800	Chr05	40292424	40293365	+	6.79216	1.27629	3.21683	0.0018007	0.00458097	-1.68708	FAD-binding Berberine family protein	Belongs to the oxygen-dependent FAD-linked oxidoreductase family	0	0	ko00940,ko01100,ko01110,map00940,map01100,map01110	BBE,FAD_binding_4	Yes
Within-group	Bulk-R_Infected_vs_Control	MD09G1018800	Chr09	1155304	1159967	-	6.78868	3.19318	4.70037	9.28327e-06	4.55118e-05	3.15552	PQ-loop repeat family protein / transmembrane family protein	Cystinosin homolog	0	0	ko04142,map04142	PQ-loop	Yes
Within-group	Bulk-R_Infected_vs_Control	MD10G1035800	Chr10	4643726	4646786	-	6.78434	8.30045	11.9592	2.64464e-20	2.44456e-17	35.6474	Pyridoxal phosphate (PLP)-dependent transferases superfamily protein	Tryptophan aminotransferase-related protein	0	0	NA	Alliinase_C,EGF_alliinase	Yes
Within-group	Bulk-R_Infected_vs_Control	MD00G1087900	Chr00	17831826	17834170	+	6.77756	3.55039	3.66976	0.000410694	0.00126049	-0.507459	Pectin lyase-like superfamily protein	Polygalacturonase-like	0	0	ko00040,ko01100,map00040,map01100	Glyco_hydro_28	Yes
Within-group	Bulk-R_Infected_vs_Control	MD05G1210600	Chr05	34198838	34200200	+	6.77271	3.20242	4.27927	4.66268e-05	0.000187784	1.59929	glutathione S-transferase TAU 19	Glutathione S-transferase	0	0	ko00480,ko00980,ko00982,ko00983,ko01524,ko05200,ko05204,ko05225,ko05418,map00480,map00980,map00982,map00983,map01524,map05200,map05204,map05225,map05418	GST_C,GST_C_2,GST_N,GST_N_3	Yes
Within-group	Bulk-R_Infected_vs_Control	MD10G1299400	Chr10	38683770	38685551	+	6.75948	7.62885	11.9668	2.55289e-20	2.42915e-17	35.7052	Polyphenol oxidase	Polyphenol oxidase	0	0	ko00350,ko00950,ko01100,ko01110,map00350,map00950,map01100,map01110	PPO1_DWL,PPO1_KFDV,Tyrosinase	Yes
Within-group	Bulk-R_Infected_vs_Control	MD11G1189000	Chr11	26603368	26605412	+	6.74443	9.37882	8.6135	2.1631e-13	1.31295e-11	19.8142	Glycosyl hydrolase superfamily protein	Belongs to the glycosyl hydrolase 17 family	0	0	NA	Glyco_hydro_17	Yes
Within-group	Bulk-R_Infected_vs_Control	MD09G1162900	Chr09	13265353	13266286	-	6.74244	-0.344359	4.20548	6.13184e-05	0.000238692	1.5242	23 kDa jasmonate-induced protein	23 kDa jasmonate-induced protein-like	0	0	NA	NA	Yes
Within-group	Bulk-R_Infected_vs_Control	MD00G1129500	Chr00	27802468	27805104	-	6.74233	3.12467	6.75006	1.39078e-09	2.26787e-08	11.606	Protein of unknown function	Encoded by	0	0	NA	SURNod19	Yes
Within-group	Bulk-R_Infected_vs_Control	MD10G1172200	Chr10	26459270	26460291	+	6.73271	0.765519	5.53979	2.96745e-07	2.30665e-06	6.52951	glutathione S-transferase TAU 8	Glutathione transferase GST 23-like	0	0	ko00480,ko00980,ko00982,ko00983,ko01524,ko05200,ko05204,ko05225,ko05418,map00480,map00980,map00982,map00983,map01524,map05200,map05204,map05225,map05418	GST_C,GST_C_2,GST_N	Yes
Within-group	Bulk-R_Infected_vs_Control	MD03G1282900	Chr03	36322193	36324159	-	6.70131	7.49011	14.276	7.27e-25	8.96789e-21	46.1065	glutathione S-transferase 7	Belongs to the GST superfamily	0	0	ko00480,ko00980,ko00982,ko00983,ko01524,ko05200,ko05204,ko05225,ko05418,map00480,map00980,map00982,map00983,map01524,map05200,map05204,map05225,map05418	GST_C,GST_N	Yes
Within-group	Bulk-R_Infected_vs_Control	MD03G1197600	Chr03	27003520	27006281	+	6.69508	3.24533	5.20863	1.19232e-06	7.58734e-06	5.11599	WRKY family transcription factor	WRKY transcription factor	0	0	NA	WRKY	Yes
Within-group	Bulk-R_Infected_vs_Control	MD04G1064400	Chr04	8673633	8674310	-	6.68588	6.36892	8.48161	4.06504e-13	2.25578e-11	19.36	osmotin 34	Thaumatin family	0	0	NA	Thaumatin	Yes
Within-group	Bulk-R_Infected_vs_Control	MD17G1267600	Chr17	32767637	32769557	-	6.68577	1.39188	5.40839	5.17694e-07	3.69968e-06	5.98745	microsomal glutathione s-transferase	Microsomal glutathione S-transferase	0	0	ko00480,ko00980,ko00982,ko00983,ko01524,ko05200,ko05204,ko05225,ko05418,map00480,map00980,map00982,map00983,map01524,map05200,map05204,map05225,map05418	MAPEG	Yes
Within-group	Bulk-R_Infected_vs_Control	MD12G1028500	Chr12	3174831	3176963	+	6.6688	2.83626	8.20068	1.55357e-12	7.05912e-11	18.1907	2-oxoglutarate (2OG) and Fe(II)-dependent oxygenase superfamily protein	1-aminocyclopropane-1-carboxylate oxidase homolog	0	0	NA	2OG-FeII_Oxy,DIOX_N	Yes
Within-group	Bulk-R_Infected_vs_Control	MD03G1140400	Chr03	14663051	14664555	+	6.65477	2.21605	4.56523	1.57248e-05	7.20169e-05	2.71093	2-oxoglutarate (2OG) and Fe(II)-dependent oxygenase superfamily protein	Belongs to the iron ascorbate-dependent oxidoreductase family	0	0	NA	2OG-FeII_Oxy,DIOX_N	Yes
Within-group	Bulk-R_Infected_vs_Control	MD05G1017400	Chr05	3059273	3060663	+	6.65458	6.74813	10.2099	1.02752e-16	2.51835e-14	27.5046	pathogenesis-related family protein	Pathogen-related protein-like	0	0	NA	NA	Yes
Within-group	Bulk-R_Infected_vs_Control	MD12G1232100	Chr12	30672373	30672741	-	6.65374	-0.0463994	5.12393	1.69072e-06	1.02894e-05	4.89091	Cystatin/monellin superfamily protein	Belongs to the cystatin family. Phytocystatin subfamily	0	0	ko04970,map04970	SQAPI	Yes
Within-group	Bulk-R_Infected_vs_Control	MD07G1161100	Chr07	23589795	23592131	-	6.64545	5.28785	8.74541	1.15016e-13	7.75207e-12	20.6757	O-methyltransferase 1	Belongs to the class I-like SAM-binding methyltransferase superfamily. Cation-independent O- methyltransferase family	0	0	ko00940,ko01058,ko01100,ko01110,map00940,map01058,map01100,map01110	Dimerisation,Methyltransf_2	Yes
Within-group	Bulk-R_Infected_vs_Control	MD10G1083900	Chr10	12294581	12295689	+	6.64213	-0.0113706	4.05261	0.000107196	0.000389182	0.998955	hemoglobin 1	Belongs to the globin family	0	0	NA	Globin	Yes
Within-group	Bulk-R_Infected_vs_Control	MD08G1242800	Chr08	30834089	30835175	-	6.63419	5.78741	9.37932	5.49744e-15	6.58716e-13	23.6568	S-adenosyl-L-methionine-dependent methyltransferases superfamily protein	methyltransferase DDB_G0268948	0	0	NA	Methyltransf_11	Yes
Within-group	Bulk-R_Infected_vs_Control	MD00G1013000	Chr00	1626538	1631166	-	6.61302	5.30786	7.80373	1.02298e-11	3.42602e-10	16.305	Glucose-methanol-choline (GMC) oxidoreductase family protein	(R)-mandelonitrile lyase	0	0	ko00460,ko01110,map00460,map01110	GMC_oxred_C,GMC_oxred_N	Yes
Within-group	Bulk-R_Infected_vs_Control	MD10G1195200	Chr10	29384702	29386179	+	6.61017	5.79679	9.85683	5.56584e-16	9.89374e-14	25.9185	2-oxoglutarate (2OG) and Fe(II)-dependent oxygenase superfamily protein	NA	0	0	NA	NA	Yes
Within-group	Bulk-R_Infected_vs_Control	MD09G1283100	Chr09	36079067	36081044	+	6.61001	1.33411	5.34933	6.63519e-07	4.59858e-06	5.73532	AMP-dependent synthetase and ligase family protein	Acyl-activating enzyme	0	0	NA	AMP-binding,AMP-binding_C	Yes
Within-group	Bulk-R_Infected_vs_Control	MD12G1238500	Chr12	31168495	31170288	+	6.60461	1.93197	6.78427	1.18909e-09	1.98706e-08	11.7829	Protein of unknown function	NA	0	0	NA	NA	Yes
Within-group	Bulk-R_Infected_vs_Control	MD04G1225300	Chr04	30515863	30516764	-	6.59888	3.07131	3.19486	0.00192825	0.00485621	-1.88547	pathogenesis-related 4	Pathogenesis-related protein	0	0	NA	Barwin	No
Within-group	Bulk-R_Infected_vs_Control	MD06G1123000	Chr06	26462265	26462819	-	6.56749	-0.514168	7.61619	2.47941e-11	7.29217e-10	15.4256	brassinosteroid-responsive RING-H2	E3 ubiquitin-protein ligase	0	0	NA	zf-RING_2	Yes
Within-group	Bulk-R_Infected_vs_Control	MD16G1160700	Chr16	13095154	13096185	+	6.55883	9.34585	11.872	3.97046e-20	3.56812e-17	35.2292	MLP-like protein 423	Major allergen Pru	0	0	NA	Bet_v_1	Yes
Within-group	Bulk-R_Infected_vs_Control	MD08G1014400	Chr08	1078656	1081614	-	6.55425	1.47979	3.56555	0.000583438	0.00171626	-0.624294	Putative lysine decarboxylase family protein	Cytokinin-activating enzyme working in the direct activation pathway. Phosphoribohydrolase that converts inactive cytokinin nucleotides to the biologically active free-base forms	0	0	NA	Lysine_decarbox	No
Within-group	Bulk-R_Infected_vs_Control	MD01G1089900	Chr01	20343434	20344513	+	6.55241	2.58449	6.09476	2.66241e-08	2.87114e-07	8.78569	NA	Belongs to the class I-like SAM-binding methyltransferase superfamily. Cation-independent O- methyltransferase family	0	0	ko00940,ko01058,ko01100,ko01110,map00940,map01058,map01100,map01110	Dimerisation,Methyltransf_2	Yes
Within-group	Bulk-R_Infected_vs_Control	MD02G1058700	Chr02	4708665	4709963	-	6.55132	-0.0812864	6.65585	2.13861e-09	3.28686e-08	11.2112	RING/U-box superfamily protein	E3 ubiquitin-protein ligase	0	0	NA	zf-RING_2	Yes
Within-group	Bulk-R_Infected_vs_Control	MD10G1296500	Chr10	38425157	38426889	+	6.53859	4.39257	4.00671	0.000126465	0.000449533	0.507377	Aluminium induced protein with YGL and LRDR motifs	Stem-specific protein	0	0	NA	DUF3700	No
Within-group	Bulk-R_Infected_vs_Control	MD16G1190000	Chr16	16553716	16555829	+	6.52853	-0.633466	3.86502	0.00020914	0.000697536	0.399933	Major facilitator superfamily protein	Belongs to the major facilitator superfamily. Sugar transporter (TC 2.A.1.1) family	0	0	NA	Sugar_tr	No
Within-group	Bulk-R_Infected_vs_Control	MD03G1044600	Chr03	3545558	3548144	+	6.51233	0.529948	5.76645	1.12104e-07	9.86344e-07	7.44814	Ribonuclease E inhibitor RraA/Dimethylmenaquinone methyltransferase	Catalyzes the aldol cleavage of 4-hydroxy-4-methyl-2- oxoglutarate (HMG) into 2 molecules of pyruvate. Also contains a secondary oxaloacetate (OAA) decarboxylase activity due to the common pyruvate enolate transition state formed following C-C bond cleavage in the retro-aldol and decarboxylation reactions	0	0	NA	RraA-like	Yes
Within-group	Bulk-R_Infected_vs_Control	MD14G1079900	Chr14	9118621	9119914	+	6.51049	3.86078	3.67698	0.000400723	0.00123325	-0.508129	beta-1	Glucan endo-1,3-beta-glucosidase, basic	0	0	NA	Glyco_hydro_17	No
Within-group	Bulk-R_Infected_vs_Control	MD04G1111500	Chr04	19712625	19714197	+	6.50894	0.671526	3.5931	0.000532054	0.00158121	-0.521886	Chalcone and stilbene synthase family protein	Belongs to the chalcone stilbene synthases family	0	0	ko00941,ko01100,ko01110,ko04712,map00941,map01100,map01110,map04712	Chal_sti_synt_C,Chal_sti_synt_N	Yes
Within-group	Bulk-R_Infected_vs_Control	MD01G1089800	Chr01	20342364	20343432	-	6.49998	4.00595	6.71362	1.64294e-09	2.61963e-08	11.4058	O-methyltransferase 1	Belongs to the class I-like SAM-binding methyltransferase superfamily. Cation-independent O- methyltransferase family	0	0	ko00940,ko01058,ko01100,ko01110,map00940,map01058,map01100,map01110	Dimerisation,Methyltransf_2	Yes
Within-group	Bulk-R_Infected_vs_Control	MD07G1300500	Chr07	35931366	35935667	-	6.49489	4.71754	5.11856	1.72843e-06	1.04775e-05	4.64848	O-methyltransferase 1	Belongs to the class I-like SAM-binding methyltransferase superfamily. Cation-independent O- methyltransferase family	0	0	ko00940,ko00950,ko01100,ko01110,map00940,map00950,map01100,map01110	Dimerisation,Methyltransf_2	Yes
Within-group	Bulk-R_Infected_vs_Control	MD01G1229700	Chr01	31892842	31895877	-	6.49236	2.93306	3.62499	0.000477925	0.00143845	-0.525214	Heavy metal transport/detoxification superfamily protein	Heavy-metal-associated domain	0	0	ko04978,map04978	HMA	Yes
Within-group	Bulk-R_Infected_vs_Control	MD05G1207400	Chr05	33813808	33816620	-	6.4815	-0.761431	9.07247	2.39708e-14	2.19055e-12	21.9761	NB-ARC domain-containing disease resistance protein	Belongs to the disease resistance NB-LRR family	0	0	ko04626,map04626	NB-ARC	Yes
Within-group	Bulk-R_Infected_vs_Control	MD07G1192900	Chr07	27304356	27304943	+	6.48086	2.3264	4.99953	2.80963e-06	1.60397e-05	4.32119	C2H2 and C2HC zinc fingers superfamily protein	ZINC FINGER protein	0	0	NA	zf-C2H2_6	Yes
Within-group	Bulk-R_Infected_vs_Control	MD15G1085900	Chr15	5949327	5951544	-	6.47701	-0.692098	5.00528	2.74473e-06	1.57219e-05	4.44864	phospholipase A 2A	Lipolytic acyl hydrolase (LAH)	0	0	NA	Patatin	No
Within-group	Bulk-R_Infected_vs_Control	MD03G1085000	Chr03	6848042	6851210	-	6.46788	4.85868	8.94038	4.51708e-14	3.60831e-12	21.6394	2-oxoglutarate (2OG) and Fe(II)-dependent oxygenase superfamily protein	NA	0	0	NA	NA	Yes
Within-group	Bulk-R_Infected_vs_Control	MD04G1112000	Chr04	19786012	19788623	+	6.45258	6.93224	8.28779	1.02566e-12	4.8932e-11	18.3619	Glutathione S-transferase family protein	Glutathione S-transferase	0	0	ko00480,ko00980,ko00982,ko00983,ko01524,ko05200,ko05204,ko05225,ko05418,map00480,map00980,map00982,map00983,map01524,map05200,map05204,map05225,map05418	GST_C_2,GST_N_3	Yes
Within-group	Bulk-R_Infected_vs_Control	MD12G1157100	Chr12	23787046	23789552	+	6.44655	0.49907	5.29852	8.20607e-07	5.50302e-06	5.55966	laccase 7	Belongs to the multicopper oxidase family	0	0	NA	Cu-oxidase,Cu-oxidase_2,Cu-oxidase_3	Yes
Within-group	Bulk-R_Infected_vs_Control	MD14G1062300	Chr14	6630729	6637798	+	6.4409	0.348828	8.15027	1.97508e-12	8.33086e-11	17.8886	bZIP transcription factor family protein	Transcription factor	0	0	ko04075,map04075	DOG1,bZIP_1,bZIP_2	Yes
Within-group	Bulk-R_Infected_vs_Control	MD15G1028400	Chr15	1703011	1705058	+	6.40881	3.39227	4.85127	5.10442e-06	2.70674e-05	3.6829	cytochrome P450	cytochrome P450	0	0	ko00140,ko00380,ko00830,ko00980,ko01100,ko04913,ko05204,map00140,map00380,map00830,map00980,map01100,map04913,map05204	p450	Yes
Within-group	Bulk-R_Infected_vs_Control	MD14G1080000	Chr14	9140931	9142400	+	6.40612	3.83797	4.06027	0.000104268	0.000379746	0.769258	beta-1	Glucan endo-1,3-beta-glucosidase, basic	0	0	NA	Glyco_hydro_17	No
Within-group	Bulk-R_Infected_vs_Control	MD02G1028800	Chr02	2206846	2208603	-	6.40499	3.42349	8.28721	1.02849e-12	4.8932e-11	18.5995	early nodulin-like protein 14	Blue copper protein-like	0	0	NA	Cu_bind_like	Yes
Within-group	Bulk-R_Infected_vs_Control	MD11G1220600	Chr11	32367775	32369713	+	6.3931	4.2007	6.94477	5.68439e-10	1.07106e-08	12.4309	Cytochrome P450 superfamily protein	Cytochrome p450	0	0	NA	p450	Yes
Within-group	Bulk-R_Infected_vs_Control	MD11G1157200	Chr11	15129329	15134720	+	6.38725	1.95508	6.52349	3.90225e-09	5.4985e-08	10.6414	cytochrome P450	Cytochrome p450	0	0	NA	p450	Yes
Within-group	Bulk-R_Infected_vs_Control	MD15G1401200	Chr15	50215029	50217383	-	6.37973	1.25024	4.21317	5.96016e-05	0.000232766	1.49263	12-oxophytodienoate reductase 2	12-oxophytodienoate reductase	0	0	ko00592,ko01100,ko01110,map00592,map01100,map01110	Oxidored_FMN	Yes
Within-group	Bulk-R_Infected_vs_Control	MD09G1032900	Chr09	1999273	2001807	+	6.37188	4.50494	6.22945	1.46355e-08	1.71181e-07	9.2482	NAD(P)-linked oxidoreductase superfamily protein	reductase	0	0	NA	Aldo_ket_red	Yes
Within-group	Bulk-R_Infected_vs_Control	MD06G1212600	Chr06	34523839	34525884	-	6.3685	0.0580071	4.48892	2.1097e-05	9.33309e-05	2.51916	Uncharacterised conserved protein UCP015417	Domain of unknown function (DUF2828)	0	0	NA	DUF2828	No
Within-group	Bulk-R_Infected_vs_Control	MD15G1170400	Chr15	13133970	13135693	-	6.36433	5.21289	8.66103	1.7229e-13	1.07813e-11	20.2654	early nodulin-like protein 14	Blue copper protein-like	0	0	NA	Cu_bind_like	Yes
Within-group	Bulk-R_Infected_vs_Control	MD00G1190900	Chr00	45985641	45988008	+	6.3447	-0.240093	4.31385	4.09705e-05	0.000167633	1.90739	beta glucosidase 15	Belongs to the glycosyl hydrolase 1 family	0	0	ko00460,ko00500,ko00940,ko01100,ko01110,map00460,map00500,map00940,map01100,map01110	Glyco_hydro_1	Yes
Within-group	Bulk-R_Infected_vs_Control	MD16G1099500	Chr16	6929699	6930385	+	6.34042	1.28131	4.46093	2.34821e-05	0.000102371	2.35616	sulfur E2	SufE-like protein	0	0	NA	SufE	Yes
Within-group	Bulk-R_Infected_vs_Control	MD03G1209200	Chr03	28869191	28870425	+	6.31286	1.51614	7.84738	8.32062e-12	2.86676e-10	16.5571	Protein of unknown function	NA	0	0	NA	NA	Yes
Within-group	Bulk-R_Infected_vs_Control	MD15G1265500	Chr15	22762229	22764377	-	6.31086	1.57628	2.86951	0.00512086	0.0113784	-2.64956	Major facilitator superfamily protein	Belongs to the major facilitator superfamily. Sugar transporter (TC 2.A.1.1) family	0	0	NA	Sugar_tr	Yes
Within-group	Bulk-R_Infected_vs_Control	MD16G1041600	Chr16	2925479	2926249	-	6.29857	1.63397	4.81324	5.94041e-06	3.08136e-05	3.64625	VQ motif-containing protein	VQ motif	0	0	NA	VQ	Yes
Within-group	Bulk-R_Infected_vs_Control	MD15G1161300	Chr15	12123243	12126059	+	6.2972	0.0747412	4.69229	9.5828e-06	4.67818e-05	3.2451	S-adenosyl-L-methionine-dependent methyltransferases superfamily protein	methyltransferase At2g41040, chloroplastic-like	0	0	NA	Methyltransf_11	Yes
Within-group	Bulk-R_Infected_vs_Control	MD14G1114000	Chr14	18400052	18400627	+	6.28522	2.66152	6.03072	3.53274e-08	3.67024e-07	8.49562	Late embryogenesis abundant (LEA) hydroxyproline-rich glycoprotein family	late embryogenesis abundant	0	0	NA	LEA_2	Yes
Within-group	Bulk-R_Infected_vs_Control	MD15G1067000	Chr15	4657437	4657961	+	6.28407	2.94394	5.75158	1.19559e-07	1.0454e-06	7.31599	Uncharacterised conserved protein UCP031279	NA	0	0	NA	NA	Yes
Within-group	Bulk-R_Infected_vs_Control	MD12G1028800	Chr12	3205502	3208811	+	6.28304	4.50505	7.8855	6.94596e-12	2.4694e-10	16.6897	gamma-glutamyl transpeptidase 1	Gamma-glutamyltranspeptidase	0	0	ko00430,ko00460,ko00480,ko00590,ko01100,map00430,map00460,map00480,map00590,map01100	G_glu_transpept	Yes
Within-group	Bulk-R_Infected_vs_Control	MD10G1299300	Chr10	38661973	38663805	-	6.27688	4.99272	5.66794	1.71491e-07	1.42734e-06	6.69771	Polyphenol oxidase	Polyphenol oxidase	0	0	ko00350,ko00950,ko01100,ko01110,map00350,map00950,map01100,map01110	PPO1_DWL,PPO1_KFDV,Tyrosinase	Yes
Within-group	Bulk-R_Infected_vs_Control	MD04G1141100	Chr04	22968897	22970834	-	6.25155	3.18158	6.0394	3.40004e-08	3.55289e-07	8.51245	O-methyltransferase 1	Belongs to the class I-like SAM-binding methyltransferase superfamily. Cation-independent O- methyltransferase family	0	0	ko00940,ko01058,ko01100,ko01110,map00940,map01058,map01100,map01110	Dimerisation,Methyltransf_2	Yes
Within-group	Bulk-R_Infected_vs_Control	MD03G1140300	Chr03	14633796	14635511	+	6.24374	6.69401	11.4004	3.61656e-19	2.34006e-16	33.1062	2-oxoglutarate (2OG) and Fe(II)-dependent oxygenase superfamily protein	Belongs to the iron ascorbate-dependent oxidoreductase family	0	0	NA	2OG-FeII_Oxy,DIOX_N	Yes
Within-group	Bulk-R_Infected_vs_Control	MD13G1108800	Chr13	7809394	7811379	-	6.23632	0.938106	7.20552	1.69751e-10	3.84042e-09	13.6508	alpha/beta-Hydrolases superfamily protein	Carboxylesterase family	0	0	NA	Abhydrolase_3	Yes
Within-group	Bulk-R_Infected_vs_Control	MD09G1204300	Chr09	19342328	19352785	-	6.22977	3.99983	6.86558	8.18614e-10	1.45435e-08	12.061	ABC-2 and Plant PDR ABC-type transporter family protein	Belongs to the ABC transporter superfamily. ABCG family. PDR (TC 3.A.1.205) subfamily	0	0	NA	ABC2_membrane,ABC_tran,ABC_trans_N,PDR_assoc	Yes
Within-group	Bulk-R_Infected_vs_Control	MD08G1232300	Chr08	29901675	29904567	+	6.22742	0.953607	5.59051	2.39003e-07	1.90402e-06	6.72456	RmlC-like cupins superfamily protein	11S globulin seed storage protein	0	0	NA	Cupin_1	Yes
Within-group	Bulk-R_Infected_vs_Control	MD13G1077900	Chr13	5478407	5482438	-	6.2152	1.45821	5.78823	1.02007e-07	9.10881e-07	7.51941	WRKY DNA-binding protein 72	WRKY transcription factor	0	0	NA	WRKY	Yes
Within-group	Bulk-R_Infected_vs_Control	MD11G1272400	Chr11	38898338	38903210	+	6.20906	5.85023	8.52502	3.30306e-13	1.89469e-11	19.5554	senescence-related gene 1	Belongs to the iron ascorbate-dependent oxidoreductase family	0	0	NA	2OG-FeII_Oxy,DIOX_N	Yes
Within-group	Bulk-R_Infected_vs_Control	MD05G1110500	Chr05	22742992	22749005	+	6.20898	3.48846	4.62083	1.26724e-05	5.95722e-05	2.8392	D-aminoacid aminotransferase-like PLP-dependent enzymes superfamily protein	Belongs to the class-IV pyridoxal-phosphate-dependent aminotransferase family	0	0	ko00270,ko00280,ko00290,ko00770,ko01100,ko01110,ko01130,ko01210,ko01230,map00270,map00280,map00290,map00770,map01100,map01110,map01130,map01210,map01230	Aminotran_4	Yes
Within-group	Bulk-R_Infected_vs_Control	MD10G1064400	Chr10	8777619	8778347	-	6.20745	-0.151452	7.32496	9.72383e-11	2.37602e-09	14.1588	Receptor-like protein kinase-related family protein	Cysteine-rich repeat secretory protein	0	0	NA	DUF1204,Stress-antifung	No
Within-group	Bulk-R_Infected_vs_Control	MD05G1251900	Chr05	38360270	38363347	+	6.2061	4.95102	8.88449	5.90546e-14	4.52733e-12	21.3518	Glutathione S-transferase family protein	Glutathione S-transferase omega-like 2	0	0	NA	GST_C_2,GST_N_2	Yes
Within-group	Bulk-R_Infected_vs_Control	MD16G1011600	Chr16	894058	894918	+	6.1995	1.3206	5.02176	2.56696e-06	1.4843e-05	4.47089	glutathione S-transferase TAU 8	Glutathione transferase GST 23-like	0	0	ko00480,ko00980,ko00982,ko00983,ko01524,ko05200,ko05204,ko05225,ko05418,map00480,map00980,map00982,map00983,map01524,map05200,map05204,map05225,map05418	GST_C,GST_C_2,GST_N	Yes
Within-group	Bulk-R_Infected_vs_Control	MD05G1168400	Chr05	29855406	29857998	-	6.19733	3.61498	5.40728	5.20109e-07	3.71612e-06	5.84281	Oxidoreductase	Quinone-oxidoreductase homolog, chloroplastic	0	0	NA	ADH_N,ADH_zinc_N_2	Yes
Within-group	Bulk-R_Infected_vs_Control	MD02G1139900	Chr02	11658186	11659876	-	6.19107	9.09244	8.70917	1.36818e-13	8.97838e-12	20.2539	dehydrin xero 1	Belongs to the plant dehydrin family	0	0	NA	Dehydrin	Yes
Within-group	Bulk-R_Infected_vs_Control	MD09G1168300	Chr09	13934972	13942392	-	6.17035	5.11093	6.78078	1.20826e-09	2.01389e-08	11.5406	Terpenoid cyclases family protein	Belongs to the terpene cyclase mutase family	0	0	ko00909,ko01110,map00909,map01110	SQHop_cyclase_C,SQHop_cyclase_N	Yes
Within-group	Bulk-R_Infected_vs_Control	MD04G1154400	Chr04	24219397	24222018	-	6.16783	2.64188	3.20142	0.00188933	0.0047749	-1.79475	2-oxoglutarate (2OG) and Fe(II)-dependent oxygenase superfamily protein	Belongs to the iron ascorbate-dependent oxidoreductase family	0	0	NA	2OG-FeII_Oxy,DIOX_N	Yes
Within-group	Bulk-R_Infected_vs_Control	MD10G1220600	Chr10	31891140	31898041	-	6.16715	2.56896	8.65183	1.80048e-13	1.12017e-11	20.2776	NAC (No Apical Meristem) domain transcriptional regulator superfamily protein	NAC domain-containing protein	0	0	NA	NAM	Yes
Within-group	Bulk-R_Infected_vs_Control	MD14G1080100	Chr14	9155426	9156905	+	6.16123	3.98072	4.26874	4.84923e-05	0.000194306	1.47916	beta-1	Glucan endo-1,3-beta-glucosidase, basic	0	0	NA	Glyco_hydro_17	No
Within-group	Bulk-R_Infected_vs_Control	MD14G1169000	Chr14	26232623	26234466	-	6.15571	6.10125	10.1309	1.49864e-16	3.36694e-14	27.1569	cytochrome P450	Cytochrome p450	0	0	ko00140,ko00380,ko00590,ko00591,ko00830,ko00980,ko01100,ko04212,ko04726,ko04750,ko04913,ko04917,ko04927,ko04934,ko05204,map00140,map00380,map00590,map00591,map00830,map00980,map01100,map04212,map04726,map04750,map04913,map04917,map04927,map04934,map05204	p450	Yes
Within-group	Bulk-R_Infected_vs_Control	MD13G1208300	Chr13	19144829	19145041	+	6.15127	0.0700732	5.4897	3.67132e-07	2.75707e-06	6.3293	Serine protease inhibitor	Potato inhibitor I family	0	0	NA	potato_inhibit	Yes
Within-group	Bulk-R_Infected_vs_Control	MD04G1019300	Chr04	2224725	2226149	-	6.15001	4.35844	6.48536	4.63722e-09	6.37609e-08	10.3737	indole-3-acetate beta-D-glucosyltransferase	Belongs to the UDP-glycosyltransferase family	0	0	NA	UDPGT	Yes
Within-group	Bulk-R_Infected_vs_Control	MD11G1054100	Chr11	4611387	4612558	-	6.14366	6.2305	9.49952	3.08776e-15	4.09407e-13	24.1238	lipid transfer protein 1	Non-specific lipid-transfer protein 1-like	0	0	NA	Tryp_alpha_amyl	Yes
Within-group	Bulk-R_Infected_vs_Control	MD15G1308800	Chr15	30962941	30966542	+	6.13862	3.75504	4.96478	3.23421e-06	1.81369e-05	4.11252	elicitor-activated gene 3-1	Cinnamyl alcohol dehydrogenase-like protein	0	0	ko00940,ko01100,ko01110,map00940,map01100,map01110	ADH_N,ADH_zinc_N	Yes
Within-group	Bulk-R_Infected_vs_Control	MD11G1171500	Chr11	18680045	18681761	+	6.11889	4.01798	4.23572	5.48257e-05	0.000216466	1.39107	2-oxoglutarate (2OG) and Fe(II)-dependent oxygenase superfamily protein	Belongs to the iron ascorbate-dependent oxidoreductase family	0	0	NA	2OG-FeII_Oxy,DIOX_N	Yes
Within-group	Bulk-R_Infected_vs_Control	MD10G1298700	Chr10	38594920	38596752	-	6.11725	4.90292	4.34734	3.61264e-05	0.000150034	1.52569	Polyphenol oxidase	Polyphenol oxidase	0	0	ko00350,ko00950,ko01100,ko01110,map00350,map00950,map01100,map01110	PPO1_DWL,PPO1_KFDV,Tyrosinase	Yes
Within-group	Bulk-R_Infected_vs_Control	MD05G1129800	Chr05	25405677	25408051	-	6.10807	-1.34974	4.79952	6.27357e-06	3.2276e-05	3.68306	Transmembrane amino acid transporter family protein	Lysine histidine transporter-like	0	0	NA	Aa_trans	Yes
Within-group	Bulk-R_Infected_vs_Control	MD02G1153500	Chr02	12743716	12745591	-	6.10286	3.64153	3.13161	0.00234422	0.0057555	-2.14418	UDP-Glycosyltransferase superfamily protein	Belongs to the UDP-glycosyltransferase family	0	0	ko00940,map00940	UDPGT	No
Within-group	Bulk-R_Infected_vs_Control	MD11G1262100	Chr11	37689682	37690980	-	6.09743	4.85187	7.32535	9.70626e-11	2.37438e-09	14.0491	D-mannose binding lectin protein with Apple-like carbohydrate-binding domain	Epidermis-specific secreted glycoprotein	0	0	NA	B_lectin,PAN_2,S_locus_glycop	Yes
Within-group	Bulk-R_Infected_vs_Control	MD10G1085800	Chr10	12563958	12565403	-	6.09742	0.498642	3.42917	0.000914738	0.0025435	-0.995766	allene oxide synthase	Belongs to the cytochrome P450 family	0	0	ko00592,ko01100,ko01110,map00592,map01100,map01110	p450	Yes
Within-group	Bulk-R_Infected_vs_Control	MD01G1169200	Chr01	27315842	27316291	-	6.08386	3.08274	5.03555	2.42689e-06	1.41316e-05	4.40909	Protein of unknown function	NA	0	0	NA	NA	Yes
Within-group	Bulk-R_Infected_vs_Control	MD16G1103600	Chr16	7247158	7249165	+	6.08279	2.33235	3.80542	0.000257567	0.000839491	0.00250142	cytochrome P450	Cytochrome p450	0	0	NA	p450	No
Within-group	Bulk-R_Infected_vs_Control	MD15G1196900	Chr15	15621520	15624902	+	6.07926	3.08875	4.88534	4.45357e-06	2.39977e-05	3.81838	Protein kinase family protein with leucine-rich repeat domain	Belongs to the protein kinase superfamily. Ser Thr protein kinase family	0	0	NA	LRRNT_2,LRR_1,LRR_6,LRR_8,Pkinase	Yes
Within-group	Bulk-R_Infected_vs_Control	MD15G1289400	Chr15	26731407	26731886	-	6.0752	-0.211204	6.33714	9.04053e-09	1.12726e-07	9.84718	Protein of unknown function	NA	0	0	NA	NA	Yes
Within-group	Bulk-R_Infected_vs_Control	MD13G1029200	Chr13	2103734	2105004	+	6.07293	-0.331711	10.1067	1.68271e-16	3.65362e-14	26.709	nudix hydrolase homolog 17	Nudix hydrolase	0	0	NA	NUDIX	Yes
Within-group	Bulk-R_Infected_vs_Control	MD07G1262300	Chr07	33159882	33162038	+	6.05213	0.266007	3.47199	0.000795248	0.00225012	-0.87223	GroES-like zinc-binding alcohol dehydrogenase family protein	Sorbitol dehydrogenase-like	0	0	ko00040,ko00051,ko01100,map00040,map00051,map01100	ADH_N,ADH_zinc_N	No
Within-group	Bulk-R_Infected_vs_Control	MD16G1160000	Chr16	12969494	12972256	-	6.0464	4.0926	7.36225	8.16815e-11	2.03744e-09	14.2849	MLP-like protein 423	Pathogenesis-related protein Bet v I family	0	0	NA	Bet_v_1	Yes
Within-group	Bulk-R_Infected_vs_Control	MD09G1167600	Chr09	13743233	13746249	+	6.04586	0.259657	4.49564	2.05602e-05	9.12433e-05	2.51849	Pectin lyase-like superfamily protein	Polygalacturonase QRT3-like	0	0	NA	Beta_helix,Pectate_lyase_3	Yes
Within-group	Bulk-R_Infected_vs_Control	MD05G1207800	Chr05	33895190	33897766	-	6.03766	-0.971786	9.17324	1.47803e-14	1.45342e-12	22.4119	NB-ARC domain-containing disease resistance protein	Belongs to the disease resistance NB-LRR family	0	0	ko04626,map04626	NB-ARC	Yes
Within-group	Bulk-R_Infected_vs_Control	MD15G1117800	Chr15	8400846	8409411	-	6.02314	0.658148	3.76273	0.000298643	0.000954431	0.0166828	pleiotropic drug resistance 12	Belongs to the ABC transporter superfamily. ABCG family. PDR (TC 3.A.1.205) subfamily	0	0	NA	ABC2_membrane,ABC_tran,ABC_trans_N,PDR_assoc	Yes
Within-group	Bulk-R_Infected_vs_Control	MD10G1286200	Chr10	37566372	37567175	+	6.00638	-1.2319	7.77093	1.19461e-11	3.89204e-10	16.0845	Integrase-type DNA-binding superfamily protein	Ethylene-responsive transcription factor	0	0	NA	AP2	Yes
Within-group	Bulk-R_Infected_vs_Control	MD08G1086300	Chr08	7180417	7183623	-	5.9992	8.12223	14.2284	8.96343e-25	8.96789e-21	45.8767	adenine phosphoribosyl transferase 1	Adenine phosphoribosyltransferase	0	0	ko00230,ko01100,map00230,map01100	Pribosyltran	Yes
Within-group	Bulk-R_Infected_vs_Control	MD17G1284300	Chr17	34351031	34357491	+	5.99822	5.06184	9.30234	7.95426e-15	8.87366e-13	23.3006	P-glycoprotein 11	ABC transporter B family member	0	0	ko02010,ko04976,ko05206,ko05226,map02010,map04976,map05206,map05226	ABC_membrane,ABC_tran	Yes
Within-group	Bulk-R_Infected_vs_Control	MD14G1160800	Chr14	25529524	25531267	-	5.99746	2.07496	3.35358	0.0011679	0.0031387	-1.33128	Chalcone and stilbene synthase family protein	Belongs to the chalcone stilbene synthases family	0	0	ko00941,ko01100,ko01110,ko04712,map00941,map01100,map01110,map04712	Chal_sti_synt_C,Chal_sti_synt_N	Yes
Within-group	Bulk-R_Infected_vs_Control	MD15G1436400	Chr15	53645614	53650350	-	5.98053	-0.530068	4.1007	9.00423e-05	0.000334372	1.18372	S-adenosyl-L-methionine-dependent methyltransferases superfamily protein	methyltransferase DDB_G0268948	0	0	NA	Methyltransf_11	Yes
Within-group	Bulk-R_Infected_vs_Control	MD17G1125900	Chr17	11057977	11059779	-	5.96026	3.72334	6.74412	1.42912e-09	2.32102e-08	11.5461	UDP-glucosyl transferase 85A3	UDP-Glycosyltransferase	0	0	NA	UDPGT	Yes
Within-group	Bulk-R_Infected_vs_Control	MD07G1209500	Chr07	28874294	28875228	-	5.959	1.89065	4.13725	7.87996e-05	0.000297679	1.19388	O-methyltransferase 1	Belongs to the class I-like SAM-binding methyltransferase superfamily. Cation-independent O- methyltransferase family	0	0	ko00940,ko00950,ko01100,ko01110,map00940,map00950,map01100,map01110	Dimerisation,Methyltransf_2	Yes
Within-group	Bulk-R_Infected_vs_Control	MD13G1161100	Chr13	12649774	12650253	-	5.9541	4.28185	7.25507	1.34755e-10	3.14092e-09	13.7344	MLP-like protein 423	Major allergen Pru	0	0	NA	Bet_v_1	Yes
Within-group	Bulk-R_Infected_vs_Control	MD03G1199000	Chr03	27235904	27239838	+	5.94849	2.88083	5.28346	8.73794e-07	5.81188e-06	5.40994	glyoxalase I homolog	lactoylglutathione	0	0	ko00620,map00620	Glyoxalase	Yes
Within-group	Bulk-R_Infected_vs_Control	MD16G1189900	Chr16	16541724	16547374	-	5.94681	6.02181	6.69449	1.79297e-09	2.84344e-08	11.0435	Major facilitator superfamily protein	Belongs to the major facilitator superfamily. Sugar transporter (TC 2.A.1.1) family	0	0	NA	Sugar_tr	Yes
Within-group	Bulk-R_Infected_vs_Control	MD12G1151200	Chr12	23114611	23116995	+	5.93639	1.16889	5.59577	2.33686e-07	1.86764e-06	6.72656	lectin protein kinase family protein	Receptor protein kinase	0	0	NA	B_lectin,PAN_1,PAN_2,Pkinase,S_locus_glycop	Yes
Within-group	Bulk-R_Infected_vs_Control	MD06G1223000	Chr06	35424072	35424817	-	5.93265	0.778075	6.62663	2.44304e-09	3.67615e-08	11.0969	NA	glutathione S-transferase	0	0	ko00480,ko00980,ko00982,ko00983,ko01524,ko05200,ko05204,ko05225,ko05418,map00480,map00980,map00982,map00983,map01524,map05200,map05204,map05225,map05418	GST_C,GST_N	Yes
Within-group	Bulk-R_Infected_vs_Control	MD06G1184300	Chr06	32256975	32259596	+	5.92578	0.433541	5.96011	4.81906e-08	4.79269e-07	8.24955	Coatomer	The coatomer is a cytosolic protein complex that binds to dilysine motifs and reversibly associates with Golgi non- clathrin-coated vesicles, which further mediate biosynthetic protein transport from the ER, via the Golgi up to the trans Golgi network. Coatomer complex is required for budding from Golgi membranes, and is essential for the retrograde Golgi-to-ER transport of dilysine-tagged protei…	0	0	NA	Coatomer_WDAD,WD40	Yes
Within-group	Bulk-R_Infected_vs_Control	MD03G1082200	Chr03	6620446	6622150	-	5.91858	3.7792	6.59759	2.78798e-09	4.11294e-08	10.8677	UDP-glucosyl transferase 76E2	UDP-glycosyltransferase 76E2-like	0	0	ko00140,ko00380,ko00402,ko00830,ko00908,ko00980,ko01100,ko01110,ko04913,ko05204,map00140,map00380,map00402,map00830,map00908,map00980,map01100,map01110,map04913,map05204	UDPGT	Yes
Within-group	Bulk-R_Infected_vs_Control	MD16G1019500	Chr16	1420150	1422146	+	5.91203	-0.197448	8.5586	2.81295e-13	1.63972e-11	19.6988	nudix hydrolase homolog 17	Nudix hydrolase	0	0	NA	NUDIX	Yes
Within-group	Bulk-R_Infected_vs_Control	MD08G1010200	Chr08	755484	757389	-	5.89843	-0.989466	8.19895	1.56639e-12	7.09136e-11	18.0172	Protein kinase protein with adenine nucleotide alpha hydrolases-like domain	Serine threonine-protein kinase	0	0	NA	Pkinase	Yes
Within-group	Bulk-R_Infected_vs_Control	MD15G1379300	Chr15	46627113	46627795	-	5.8931	1.76721	3.73	0.000334281	0.00105406	-0.169625	NA	NA	0	0	NA	NA	Yes
Within-group	Bulk-R_Infected_vs_Control	MD10G1184800	Chr10	27807139	27807897	-	5.89052	0.240249	5.84081	8.11734e-08	7.48396e-07	7.75374	ethylene response factor 1	Ethylene-responsive transcription factor 1B-like	0	0	ko04016,ko04075,map04016,map04075	AP2	Yes
Within-group	Bulk-R_Infected_vs_Control	MD06G1080200	Chr06	19616848	19617825	+	5.87133	1.61676	5.88346	6.74003e-08	6.3833e-07	7.90586	Protein of unknown function (DUF567)	LURP-one-related	0	0	NA	LOR	Yes
Within-group	Bulk-R_Infected_vs_Control	MD06G1130400	Chr06	27426400	27428144	-	5.86703	3.33909	7.70681	1.6172e-11	5.10435e-10	15.9171	Integrase-type DNA-binding superfamily protein	ethylene-responsive transcription factor	0	0	NA	AP2	Yes
Within-group	Bulk-R_Infected_vs_Control	MD15G1123700	Chr15	8944703	8945495	+	5.86553	2.65677	4.74065	7.92122e-06	3.95963e-05	3.30355	plant natriuretic peptide A	EG45-like domain containing protein	0	0	NA	DPBB_1	Yes
Within-group	Bulk-R_Infected_vs_Control	MD04G1135300	Chr04	22236955	22238840	+	5.85876	-0.313628	5.74292	1.24119e-07	1.07944e-06	7.36054	NAD(P)-binding Rossmann-fold superfamily protein	Tropinone reductase homolog	0	0	ko00960,ko01100,ko01110,map00960,map01100,map01110	adh_short,adh_short_C2	No
Within-group	Bulk-R_Infected_vs_Control	MD15G1374300	Chr15	45751562	45754870	+	5.85312	-0.479317	3.81154	0.000252145	0.000824023	0.224433	beta glucosidase 15	Belongs to the glycosyl hydrolase 1 family	0	0	ko00460,ko00500,ko00940,ko01100,ko01110,map00460,map00500,map00940,map01100,map01110	Glyco_hydro_1	No
Within-group	Bulk-R_Infected_vs_Control	MD02G1303900	Chr02	35748230	35749977	+	5.84998	1.79097	8.25104	1.22205e-12	5.70502e-11	18.4146	NAD(P)-binding Rossmann-fold superfamily protein	NA	0	0	NA	NA	Yes
Within-group	Bulk-R_Infected_vs_Control	MD15G1191300	Chr15	15040574	15043088	-	5.83431	0.665165	3.80648	0.000256622	0.000837027	0.118112	Phosphorylase superfamily protein	Bark storage protein	0	0	NA	PNP_UDP_1	Yes
Within-group	Bulk-R_Infected_vs_Control	MD05G1106200	Chr05	21980723	21983227	-	5.83159	0.145751	3.04967	0.00300753	0.00713759	-2.07637	beta glucosidase 12	Belongs to the glycosyl hydrolase 1 family	0	0	ko00460,ko00500,ko00940,ko01100,ko01110,map00460,map00500,map00940,map01100,map01110	Glyco_hydro_1	No
Within-group	Bulk-R_Infected_vs_Control	MD08G1141400	Chr08	13916513	13924043	-	5.82738	3.12207	3.66499	0.000417399	0.00127767	-0.473012	pleiotropic drug resistance 12	Belongs to the ABC transporter superfamily. ABCG family. PDR (TC 3.A.1.205) subfamily	0	0	NA	ABC2_membrane,ABC_tran,ABC_trans_N,PDR_assoc	Yes
Within-group	Bulk-R_Infected_vs_Control	MD01G1122000	Chr01	23530357	23531554	-	5.82717	1.87276	4.92521	3.79425e-06	2.08726e-05	4.04792	F-box family protein	f-box protein	0	0	NA	F-box,FBD	Yes
Within-group	Bulk-R_Infected_vs_Control	MD10G1053100	Chr10	7089099	7090542	-	5.82156	1.13482	5.0827	2.00205e-06	1.19107e-05	4.67029	2-oxoglutarate (2OG) and Fe(II)-dependent oxygenase superfamily protein	Belongs to the iron ascorbate-dependent oxidoreductase family	0	0	NA	2OG-FeII_Oxy,DIOX_N	Yes
Within-group	Bulk-R_Infected_vs_Control	MD13G1014600	Chr13	911301	913289	-	5.82126	-1.32406	6.70321	1.72303e-09	2.73789e-08	11.3942	NAD(P)-linked oxidoreductase superfamily protein	D-galacturonate reductase-like	0	0	ko00053,map00053	Aldo_ket_red	Yes
Within-group	Bulk-R_Infected_vs_Control	MD05G1315200	Chr05	44483745	44485367	+	5.81868	0.740123	2.82798	0.00577122	0.0126301	-2.70064	Aluminium induced protein with YGL and LRDR motifs	Stem-specific protein	0	0	NA	DUF3700	No
Within-group	Bulk-R_Infected_vs_Control	MD05G1292600	Chr05	42403159	42406601	+	5.81433	-1.96362	6.33574	9.09755e-09	1.13376e-07	9.81776	senescence-related gene 1	Belongs to the iron ascorbate-dependent oxidoreductase family	0	0	NA	2OG-FeII_Oxy,DIOX_N	No
Within-group	Bulk-R_Infected_vs_Control	MD05G1350300	Chr05	46790064	46790411	-	5.81299	-0.692756	5.80528	9.47347e-08	8.56344e-07	7.61818	Stigma-specific Stig1 family protein	Stigma-specific protein, Stig1	0	0	NA	Stig1	Yes
Within-group	Bulk-R_Infected_vs_Control	MD09G1143200	Chr09	11168210	11168458	+	5.81073	-1.38336	6.60026	2.75443e-09	4.06901e-08	10.944	UDP-glucosyl transferase 85A3	UDP-Glycosyltransferase	0	0	NA	UDPGT	Yes
Within-group	Bulk-R_Infected_vs_Control	MD12G1041800	Chr12	4637528	4639583	+	5.8105	1.39782	7.09923	2.78187e-10	5.84029e-09	13.1818	syntaxin of plants 121	Belongs to the syntaxin family	0	0	ko04130,ko04721,map04130,map04721	SNARE,Syntaxin	Yes
Within-group	Bulk-R_Infected_vs_Control	MD13G1208700	Chr13	19181469	19182084	+	5.80848	2.01894	4.50054	2.01772e-05	8.96913e-05	2.44598	Serine protease inhibitor	Potato inhibitor I family	0	0	NA	potato_inhibit	Yes
Within-group	Bulk-R_Infected_vs_Control	MD10G1172300	Chr10	26469318	26470297	+	5.80536	6.6193	11.2992	5.82224e-19	3.55398e-16	32.6075	glutathione S-transferase TAU 8	Glutathione transferase GST 23-like	0	0	ko00480,ko00980,ko00982,ko00983,ko01524,ko05200,ko05204,ko05225,ko05418,map00480,map00980,map00982,map00983,map01524,map05200,map05204,map05225,map05418	GST_C,GST_C_2,GST_N	Yes
Within-group	Bulk-R_Infected_vs_Control	MD16G1215200	Chr16	20888137	20890059	-	5.7958	-0.350753	5.96457	4.72577e-08	4.71787e-07	8.27525	2-oxoglutarate (2OG) and Fe(II)-dependent oxygenase superfamily protein	Belongs to the iron ascorbate-dependent oxidoreductase family	0	0	NA	2OG-FeII_Oxy,DIOX_N	Yes
Within-group	Bulk-R_Infected_vs_Control	MD15G1438500	Chr15	53808076	53809821	-	5.79262	0.0685769	8.79145	9.22445e-14	6.41783e-12	20.8162	Exostosin family protein	xyloglucan galactosyltransferase	0	0	NA	Exostosin	Yes
Within-group	Bulk-R_Infected_vs_Control	MD15G1085500	Chr15	5906628	5909185	+	5.7926	1.135	3.42208	0.000936077	0.00259399	-1.0908	phospholipase A 2A	Lipolytic acyl hydrolase (LAH)	0	0	NA	Patatin	Yes
Within-group	Bulk-R_Infected_vs_Control	MD06G1223400	Chr06	35439993	35441076	+	5.78875	-1.06886	9.56262	2.28121e-15	3.23692e-13	24.1812	NA	NA	0	0	NA	NA	Yes
Within-group	Bulk-R_Infected_vs_Control	MD05G1184300	Chr05	31259973	31261200	+	5.78691	-0.735992	5.62514	2.06076e-07	1.67386e-06	6.88419	glutathione S-transferase tau 7	Glutathione S-transferase	0	0	ko00480,ko00980,ko00982,ko00983,ko01524,ko05200,ko05204,ko05225,ko05418,map00480,map00980,map00982,map00983,map01524,map05200,map05204,map05225,map05418	GST_C,GST_N	Yes
Within-group	Bulk-R_Infected_vs_Control	MD08G1156600	Chr08	17430126	17432489	+	5.77532	1.11598	2.66895	0.00902309	0.0186028	-3.11143	ACT-like superfamily protein	ACT domain	0	0	NA	ACT,ACT_6	No
Within-group	Bulk-R_Infected_vs_Control	MD10G1284700	Chr10	37456466	37460459	-	5.75881	1.3501	7.39267	7.08416e-11	1.79763e-09	14.4997	sodium/calcium exchanger family protein / calcium-binding EF hand family protein	EF-hand, calcium binding motif	0	0	NA	EF-hand_7,Na_Ca_ex	Yes
Within-group	Bulk-R_Infected_vs_Control	MD06G1124400	Chr06	26645912	26650494	+	5.75627	0.0717034	9.96814	3.2659e-16	6.60308e-14	26.1863	AP2/B3-like transcriptional factor family protein	B3 DNA binding domain	0	0	NA	B3	Yes
Within-group	Bulk-R_Infected_vs_Control	MD13G1181800	Chr13	15172897	15176258	-	5.74323	2.94181	4.18719	6.56e-05	0.000253136	1.23383	alpha/beta-Hydrolases superfamily protein	1,4-beta-D-glucanase-like	0	0	ko00361,ko00364,ko00623,ko01100,ko01110,ko01120,ko01130,map00361,map00364,map00623,map01100,map01110,map01120,map01130	DLH	Yes
Within-group	Bulk-R_Infected_vs_Control	MD11G1244800	Chr11	35547099	35548059	-	5.73847	-0.221802	5.876	6.96302e-08	6.56183e-07	7.90714	Dynein light chain type 1 family protein	Dynein light chain	0	0	ko04962,map04962	Dynein_light	Yes
Within-group	Bulk-R_Infected_vs_Control	MD14G1111500	Chr14	17953030	17955957	-	5.7339	2.77964	4.27055	4.81676e-05	0.000193124	1.55838	1-aminocyclopropane-1-carboxylic acid (acc) synthase 6	1-aminocyclopropane-1-carboxylate	0	0	ko00270,ko01100,ko01110,ko04016,map00270,map01100,map01110,map04016	Aminotran_1_2	Yes
Within-group	Bulk-R_Infected_vs_Control	MD05G1211100	Chr05	34233627	34233971	+	5.73376	0.155967	5.28502	8.68152e-07	5.78148e-06	5.50329	glutathione S-transferase TAU 19	Glutathione S-transferase	0	0	ko00480,ko00980,ko00982,ko00983,ko01524,ko05200,ko05204,ko05225,ko05418,map00480,map00980,map00982,map00983,map01524,map05200,map05204,map05225,map05418	GST_C,GST_C_2,GST_N,GST_N_3	Yes
Within-group	Bulk-R_Infected_vs_Control	MD09G1204200	Chr09	19305215	19314828	-	5.72795	2.76662	4.6364	1.1926e-05	5.65318e-05	2.88132	ABC-2 and Plant PDR ABC-type transporter family protein	Belongs to the ABC transporter superfamily. ABCG family. PDR (TC 3.A.1.205) subfamily	0	0	NA	ABC2_membrane,ABC_tran,ABC_trans_N,PDR_assoc	Yes
Within-group	Bulk-R_Infected_vs_Control	MD01G1027900	Chr01	10410576	10413690	+	5.72761	0.167576	6.47959	4.75986e-09	6.514e-08	10.4591	cysteine-rich RLK (RECEPTOR-like protein kinase) 26	Cysteine-rich receptor-like protein kinase	0	0	ko04010,ko04064,ko04620,ko04621,ko04624,ko04722,ko05133,ko05140,ko05142,ko05145,ko05152,ko05162,ko05164,map04010,map04064,map04620,map04621,map04624,map04722,map05133,map05140,map05142,map05145,map05152,map05162,map05164	Pkinase,Pkinase_Tyr,Stress-antifung	Yes
Within-group	Bulk-R_Infected_vs_Control	MD09G1055000	Chr09	3656571	3658237	+	5.72184	1.17599	5.7237	1.34867e-07	1.15858e-06	7.2558	Protein of unknown function (DUF1997)	Protein of unknown function (DUF1997)	0	0	NA	DUF1997	Yes
Within-group	Bulk-R_Infected_vs_Control	MD07G1006100	Chr07	592016	595418	+	5.71904	3.67303	7.90129	6.44503e-12	2.30908e-10	16.8057	cytochrome P450	Cytochrome p450	0	0	ko00140,ko00380,ko00590,ko00591,ko00830,ko00980,ko01100,ko04212,ko04726,ko04750,ko04913,ko04917,ko04927,ko04934,ko05204,map00140,map00380,map00590,map00591,map00830,map00980,map01100,map04212,map04726,map04750,map04913,map04917,map04927,map04934,map05204	p450	Yes
Within-group	Bulk-R_Infected_vs_Control	MD15G1328900	Chr15	36167441	36170593	-	5.70565	0.244394	4.79494	6.38866e-06	3.27605e-05	3.62015	Cupredoxin superfamily protein	Belongs to the multicopper oxidase family	0	0	ko00053,ko01100,map00053,map01100	Cu-oxidase,Cu-oxidase_2,Cu-oxidase_3	Yes
Within-group	Bulk-R_Infected_vs_Control	MD05G1223100	Chr05	35562549	35567658	+	5.70208	3.93893	6.68174	1.90042e-09	2.98169e-08	11.2556	potassium transporter 1	Potassium transporter	0	0	NA	K_trans	Yes
Within-group	Bulk-R_Infected_vs_Control	MD11G1219700	Chr11	32096236	32098133	+	5.69897	-0.248835	5.15918	1.46249e-06	9.06756e-06	5.02147	Cytochrome P450 superfamily protein	Cytochrome p450	0	0	NA	p450	Yes
Within-group	Bulk-R_Infected_vs_Control	MD09G1142600	Chr09	11136956	11137297	+	5.69459	-1.40195	7.57245	3.04638e-11	8.67574e-10	15.1904	UDP-glucosyl transferase 85A2	NA	0	0	NA	NA	Yes
Within-group	Bulk-R_Infected_vs_Control	MD11G1280200	Chr11	39800138	39806264	+	5.69428	2.79701	2.55371	0.0123372	0.0244447	-3.53529	sulfate transporter 3	Sulfate transporter 3.1-like	0	0	NA	STAS,Sulfate_transp	Yes
Within-group	Bulk-R_Infected_vs_Control	MD14G1019800	Chr14	1874571	1874906	-	5.68908	-0.662139	9.64423	1.54223e-15	2.32067e-13	24.5745	peptidoglycan-binding LysM domain-containing protein	Peptidoglycan-binding LysM domain-containing protein	0	0	NA	LysM	No
Within-group	Bulk-R_Infected_vs_Control	MD16G1056700	Chr16	4073313	4075687	-	5.68655	0.811914	7.16772	2.02392e-10	4.479e-09	13.4827	Cytochrome P450 superfamily protein	Cytochrome p450	0	0	ko00905,map00905	p450	Yes
Within-group	Bulk-R_Infected_vs_Control	MD04G1222400	Chr04	30327099	30328873	+	5.6844	3.69848	7.12263	2.49568e-10	5.33779e-09	13.2287	Protein of unknown function	NA	0	0	NA	NA	Yes
Within-group	Bulk-R_Infected_vs_Control	MD15G1075000	Chr15	5115101	5118381	+	5.67197	1.98047	6.62971	2.40896e-09	3.63381e-08	11.0982	Leucine-rich repeat protein kinase family protein	Belongs to the protein kinase superfamily. Ser Thr protein kinase family	0	0	ko04010,ko04064,ko04620,ko04624,ko04722,ko05133,ko05140,ko05142,ko05145,ko05152,ko05162,ko05169,map04010,map04064,map04620,map04624,map04722,map05133,map05140,map05142,map05145,map05152,map05162,map05169	LRRNT_2,LRR_1,LRR_8,Pkinase,Pkinase_Tyr	Yes
Within-group	Bulk-R_Infected_vs_Control	MD01G1163900	Chr01	26862823	26864553	+	5.66997	2.34285	4.50657	1.97155e-05	8.78682e-05	2.42178	AZA-guanine resistant1	Adenine guanine permease	0	0	NA	Xan_ur_permease	Yes
Within-group	Bulk-R_Infected_vs_Control	MD07G1184000	Chr07	26400819	26409129	-	5.66604	0.861681	5.68948	1.56311e-07	1.31767e-06	7.12014	cyclic nucleotide gated channel 1	Cyclic nucleotide-gated ion channel 1-like	0	0	ko04626,map04626	Ion_trans,Pkinase_Tyr	No
Within-group	Bulk-R_Infected_vs_Control	MD03G1088100	Chr03	7280178	7287248	+	5.66593	0.487212	3.78311	0.000278316	0.000898252	0.0909071	cytochrome P450	Belongs to the cytochrome P450 family	0	0	ko00906,map00906	p450	No
Within-group	Bulk-R_Infected_vs_Control	MD05G1331000	Chr05	45507271	45510419	+	5.66343	1.25577	6.91033	6.66257e-10	1.22617e-08	12.3414	S-locus lectin protein kinase family protein	NA	0	0	NA	NA	Yes
Within-group	Bulk-R_Infected_vs_Control	MD05G1184200	Chr05	31257878	31258927	-	5.66084	0.492421	4.52961	1.80431e-05	8.13168e-05	2.63508	glutathione S-transferase tau 7	Glutathione S-transferase	0	0	ko00480,ko00980,ko00982,ko00983,ko01524,ko05200,ko05204,ko05225,ko05418,map00480,map00980,map00982,map00983,map01524,map05200,map05204,map05225,map05418	GST_C,GST_N	Yes
Within-group	Bulk-R_Infected_vs_Control	MD09G1142900	Chr09	11153903	11154190	+	5.64488	-1.17756	6.46796	5.01668e-09	6.79078e-08	10.3867	UDP-glucosyl transferase 85A5	NA	0	0	NA	NA	Yes
Within-group	Bulk-R_Infected_vs_Control	MD12G1149800	Chr12	23012766	23015244	+	5.64328	2.93473	4.08936	9.38313e-05	0.000346533	0.925588	NAD(P)-linked oxidoreductase superfamily protein	Aldo-keto reductase family 4 member	0	0	ko00010,ko00040,ko00561,ko00930,ko01100,ko01110,ko01120,ko01130,ko01220,map00010,map00040,map00561,map00930,map01100,map01110,map01120,map01130,map01220	Aldo_ket_red	Yes
Within-group	Bulk-R_Infected_vs_Control	MD08G1101700	Chr08	8546915	8549334	+	5.62696	4.84626	4.16932	7.0058e-05	0.000268257	0.910188	alpha-amylase-like	NA	0	0	NA	NA	Yes
Within-group	Bulk-R_Infected_vs_Control	MD14G1062500	Chr14	6651829	6653036	+	5.62276	6.67193	9.22121	1.1741e-14	1.21356e-12	22.725	polygalacturonase inhibiting protein 1	Polygalacturonase	0	0	NA	LRRNT_2,LRR_1,LRR_4,LRR_6,LRR_8	Yes
Within-group	Bulk-R_Infected_vs_Control	MD12G1211400	Chr12	29012047	29015283	-	5.61728	-1.59593	3.76614	0.000295148	0.000944908	0.108829	beta glucosidase 12	Belongs to the glycosyl hydrolase 1 family	0	0	ko00460,ko00500,ko00940,ko01100,ko01110,map00460,map00500,map00940,map01100,map01110	Glyco_hydro_1	Yes
Within-group	Bulk-R_Infected_vs_Control	MD17G1267400	Chr17	32754259	32756338	-	5.58161	0.138465	6.60261	2.7251e-09	4.03305e-08	10.9914	microsomal glutathione s-transferase	Microsomal glutathione S-transferase	0	0	ko00480,ko00980,ko00982,ko00983,ko01524,ko05200,ko05204,ko05225,ko05418,map00480,map00980,map00982,map00983,map01524,map05200,map05204,map05225,map05418	MAPEG	Yes
Within-group	Bulk-R_Infected_vs_Control	MD03G1204600	Chr03	27959722	27965096	-	5.57411	0.0180412	3.51387	0.000692745	0.00199517	-0.739195	beta glucosidase 13	Belongs to the glycosyl hydrolase 1 family	0	0	ko00460,ko00500,ko00940,ko01100,ko01110,map00460,map00500,map00940,map01100,map01110	Glyco_hydro_1	Yes
Within-group	Bulk-R_Infected_vs_Control	MD13G1011000	Chr13	666151	668317	-	5.5705	0.0121056	3.8067	0.000256423	0.000836523	0.180856	Peroxidase superfamily protein	Belongs to the peroxidase family. Classical plant (class III) peroxidase subfamily	0	0	ko00940,ko01100,ko01110,map00940,map01100,map01110	peroxidase	Yes
Within-group	Bulk-R_Infected_vs_Control	MD02G1148700	Chr02	12223380	12224787	-	5.5689	3.82191	4.35088	3.5649e-05	0.000148318	1.72302	Protein of unknown function	NA	0	0	NA	NA	Yes
Within-group	Bulk-R_Infected_vs_Control	MD14G1206100	Chr14	29337285	29340725	+	5.56221	1.77193	6.19552	1.70244e-08	1.95033e-07	9.22003	Leucine-rich repeat protein kinase family protein	Belongs to the protein kinase superfamily. Ser Thr protein kinase family	0	0	NA	LRRNT_2,LRR_1,LRR_6,LRR_8,Pkinase	Yes
Within-group	Bulk-R_Infected_vs_Control	MD13G1148200	Chr13	11600669	11602793	+	5.55925	1.67116	6.29855	1.07475e-08	1.30225e-07	9.66624	myb domain protein 108	Transcription factor	0	0	NA	Myb_DNA-binding	Yes
Within-group	Bulk-R_Infected_vs_Control	MD10G1041900	Chr10	5419231	5421666	-	5.55077	-0.127524	6.37722	7.55115e-09	9.67998e-08	10.0181	monooxygenase 1	FAD binding domain	0	0	NA	FAD_binding_3	Yes
Within-group	Bulk-R_Infected_vs_Control	MD07G1250500	Chr07	31911402	31914179	-	5.54916	1.50763	5.60083	2.28687e-07	1.83221e-06	6.74298	Major facilitator superfamily protein	Belongs to the major facilitator superfamily. Sugar transporter (TC 2.A.1.1) family	0	0	NA	Sugar_tr	No
Within-group	Bulk-R_Infected_vs_Control	MD10G1109000	Chr10	17952487	17952684	-	5.54339	-0.62828	9.54048	2.5369e-15	3.49251e-13	24.1308	Protein of unknown function	NA	0	0	NA	NA	Yes
Within-group	Bulk-R_Infected_vs_Control	MD09G1108500	Chr09	8028935	8035244	-	5.54156	-0.314797	3.93436	0.000163731	0.000563692	0.59097	MATE efflux family protein	Belongs to the multi antimicrobial extrusion (MATE) (TC 2.A.66.1) family	0	0	NA	MatE	Yes
Within-group	Bulk-R_Infected_vs_Control	MD17G1099600	Chr17	8456271	8458710	+	5.53119	4.59858	6.11352	2.45029e-08	2.67539e-07	8.66032	cellulose synthase-like B3	Belongs to the glycosyltransferase 2 family	0	0	NA	Cellulose_synt	Yes
Within-group	Bulk-R_Infected_vs_Control	MD11G1269400	Chr11	38507168	38511209	-	5.52907	4.54198	4.54623	1.69233e-05	7.68423e-05	2.3538	Kunitz family trypsin and protease inhibitor protein	alpha-amylase subtilisin	0	0	NA	Kunitz_legume	Yes
Within-group	Bulk-R_Infected_vs_Control	MD02G1028700	Chr02	2200895	2202539	-	5.52841	6.74244	10.248	8.56309e-17	2.18136e-14	27.6154	blue-copper-binding protein	NA	0	0	NA	NA	Yes
Within-group	Bulk-R_Infected_vs_Control	MD13G1189100	Chr13	16144850	16150276	-	5.5255	4.64515	5.51609	3.28213e-07	2.51501e-06	6.13438	Major facilitator superfamily protein	Belongs to the major facilitator superfamily. Sugar transporter (TC 2.A.1.1) family	0	0	NA	Sugar_tr	Yes
Within-group	Bulk-R_Infected_vs_Control	MD06G1147500	Chr06	28961772	28964870	+	5.51486	-0.259061	6.5726	3.12318e-09	4.54067e-08	10.8588	AMP-dependent synthetase and ligase family protein	4-coumarate--CoA ligase-like 9	0	0	NA	AMP-binding,AMP-binding_C	Yes
Within-group	Bulk-R_Infected_vs_Control	MD03G1217300	Chr03	30152900	30154673	-	5.51155	-0.356582	3.85768	0.000214597	0.000713443	0.352429	MYB-like 102	SANT SWI3, ADA2, N-CoR and TFIIIB'' DNA-binding domains	0	0	NA	Myb_DNA-binding	Yes
Within-group	Bulk-R_Infected_vs_Control	MD09G1240700	Chr09	30760751	30761518	+	5.50832	1.84012	6.05466	3.17872e-08	3.35562e-07	8.60966	RING/U-box superfamily protein	E3 ubiquitin-protein ligase	0	0	NA	zf-RING_2	Yes
Within-group	Bulk-R_Infected_vs_Control	MD14G1118200	Chr14	19292648	19298341	-	5.50791	-0.774084	5.42764	4.7734e-07	3.45325e-06	6.09095	multidrug resistance-associated protein 14	ABC transporter C family member 10-like	0	0	ko01523,ko01524,ko02010,ko04976,map01523,map01524,map02010,map04976	ABC_membrane,ABC_tran	Yes
Within-group	Bulk-R_Infected_vs_Control	MD04G1224400	Chr04	30442783	30446345	+	5.5061	2.53043	4.2532	5.13799e-05	0.000204649	1.52115	bZIP transcription factor family protein	Light-inducible protein	0	0	NA	bZIP_1,bZIP_C	No
Within-group	Bulk-R_Infected_vs_Control	MD05G1030800	Chr05	4960821	4963270	+	5.50009	2.91908	5.30219	8.08131e-07	5.42552e-06	5.43632	Integrase-type DNA-binding superfamily protein	transcription factor	0	0	NA	AP2	Yes
Within-group	Bulk-R_Infected_vs_Control	MD07G1084300	Chr07	8697902	8698723	-	5.48497	-1.61233	7.33338	9.34867e-11	2.29999e-09	14.1261	glycosyl hydrolase 9B10	NA	0	0	NA	NA	Yes
Within-group	Bulk-R_Infected_vs_Control	MD06G1124100	Chr06	26599531	26603044	-	5.47928	0.231401	3.27558	0.00149723	0.00390096	-1.44924	2-oxoglutarate (2OG) and Fe(II)-dependent oxygenase superfamily protein	Belongs to the iron ascorbate-dependent oxidoreductase family	0	0	NA	2OG-FeII_Oxy,DIOX_N	Yes
Within-group	Bulk-R_Infected_vs_Control	MD02G1284500	Chr02	34094570	34096383	+	5.47227	3.92742	4.38599	3.12227e-05	0.000131783	1.8708	NADPH:quinone oxidoreductase	NADPH quinone	0	0	NA	FMN_red	Yes
Within-group	Bulk-R_Infected_vs_Control	MD08G1242700	Chr08	30833391	30834087	-	5.47153	-0.708234	7.32928	9.5296e-11	2.33739e-09	14.158	cytochrome P450	Cytochrome p450	0	0	ko00940,ko00941,ko00945,ko01100,ko01110,map00940,map00941,map00945,map01100,map01110	p450	Yes
Within-group	Bulk-R_Infected_vs_Control	MD08G1078800	Chr08	6572581	6573039	-	5.46828	-0.75788	6.56106	3.29109e-09	4.74058e-08	10.8019	basic leucine-zipper 4	Ocs element-binding factor 1-like	0	0	NA	bZIP_1,bZIP_2	Yes
Within-group	Bulk-R_Infected_vs_Control	MD16G1263500	Chr16	32989353	32990315	+	5.46487	1.64768	6.25404	1.31144e-08	1.55641e-07	9.46229	Protein of unknown function	NA	0	0	NA	NA	Yes
Within-group	Bulk-R_Infected_vs_Control	MD17G1224900	Chr17	27354659	27359805	+	5.4633	7.64961	12.8868	3.67754e-22	8.49826e-19	39.8816	hydroxycinnamoyl-CoA shikimate/quinate hydroxycinnamoyl transferase	Shikimate O-hydroxycinnamoyltransferase-like	0	0	ko00940,ko00941,ko00945,ko01100,ko01110,map00940,map00941,map00945,map01100,map01110	Transferase	Yes
Within-group	Bulk-R_Infected_vs_Control	MD14G1190200	Chr14	28152930	28153586	+	5.44791	1.16702	7.89553	6.62339e-12	2.36251e-10	16.7759	RmlC-like cupins superfamily protein	Germin-like protein subfamily T member	0	0	NA	Cupin_1	Yes
Within-group	Bulk-R_Infected_vs_Control	MD16G1027500	Chr16	1935669	1941362	+	5.44423	4.49497	7.14539	2.24525e-10	4.88817e-09	13.2512	serine carboxypeptidase-like 50	Belongs to the peptidase S10 family	0	0	NA	Peptidase_S10	Yes
Within-group	Bulk-R_Infected_vs_Control	MD05G1203100	Chr05	33337759	33339285	-	5.44392	5.34783	7.61173	2.5321e-11	7.43362e-10	15.3085	cytochrome P450	Cytochrome p450	0	0	ko00073,map00073	p450	Yes
Within-group	Bulk-R_Infected_vs_Control	MD10G1244000	Chr10	33871187	33872773	-	5.44122	-1.36683	5.8045	9.50549e-08	8.58759e-07	7.61369	FAD-binding Berberine family protein	NA	0	0	NA	NA	Yes
Within-group	Bulk-R_Infected_vs_Control	MD05G1334200	Chr05	45737172	45740347	+	5.43647	7.7097	12.0904	1.43746e-20	1.50016e-17	36.2288	Quinone reductase family protein	Minor allergen Alt a	0	0	ko00130,ko01110,map00130,map01110	FMN_red	Yes
Within-group	Bulk-R_Infected_vs_Control	MD05G1332300	Chr05	45592944	45596256	+	5.43106	2.61462	5.9876	4.27099e-08	4.33151e-07	8.29729	S-locus lectin protein kinase family protein	G-type lectin S-receptor-like serine threonine-protein kinase	0	0	NA	B_lectin,DUF3403,PAN_2,Pkinase_Tyr,S_locus_glycop	Yes
Within-group	Bulk-R_Infected_vs_Control	MD10G1079800	Chr10	11636302	11638781	-	5.42669	3.98794	3.88379	0.000195783	0.000658418	0.154344	polyol/monosaccharide transporter 1	Belongs to the major facilitator superfamily. Sugar transporter (TC 2.A.1.1) family	0	0	NA	Sugar_tr	No
Within-group	Bulk-R_Infected_vs_Control	MD13G1116400	Chr13	8507535	8508457	-	5.41751	-2.06033	3.19576	0.00192291	0.00484501	-1.54261	cytochrome P450	Cytochrome p450	0	0	NA	p450	No
Within-group	Bulk-R_Infected_vs_Control	MD13G1011200	Chr13	677492	678650	-	5.4166	-0.901968	4.78833	6.5585e-06	3.34934e-05	3.63521	Peroxidase superfamily protein	Belongs to the peroxidase family. Classical plant (class III) peroxidase subfamily	0	0	ko00940,ko01100,ko01110,map00940,map01100,map01110	peroxidase	Yes
Within-group	Bulk-R_Infected_vs_Control	MD03G1020200	Chr03	1558966	1560029	+	5.4131	-0.313511	5.26686	9.36329e-07	6.16445e-06	5.43889	receptor-like protein kinase 1	G-type lectin S-receptor-like serine threonine-protein kinase	0	0	NA	B_lectin,PAN_2,Pkinase,Pkinase_Tyr,S_locus_glycop	Yes
Within-group	Bulk-R_Infected_vs_Control	MD05G1359900	Chr05	47467924	47470767	-	5.40636	2.64564	5.19922	1.23966e-06	7.85306e-06	5.06929	inositol transporter 4	Belongs to the major facilitator superfamily. Sugar transporter (TC 2.A.1.1) family	0	0	NA	Sugar_tr	No
Within-group	Bulk-R_Infected_vs_Control	MD07G1222100	Chr07	29901654	29904086	-	5.40622	0.217059	8.23827	1.29878e-12	6.01979e-11	18.2923	CRINKLY4 related 3	Serine threonine-protein kinase-like protein	0	0	ko04010,ko04064,ko04620,ko04624,ko04722,ko05133,ko05140,ko05142,ko05145,ko05152,ko05162,ko05169,map04010,map04064,map04620,map04624,map04722,map05133,map05140,map05142,map05145,map05152,map05162,map05169	Pkinase,Pkinase_Tyr,RCC1_2	Yes
Within-group	Bulk-R_Infected_vs_Control	MD04G1097800	Chr04	18166603	18167139	-	5.39951	-1.02362	8.31448	9.03025e-13	4.42647e-11	18.5641	Protein of unknown function	Senescence regulator	0	0	NA	Senescence_reg	Yes
Within-group	Bulk-R_Infected_vs_Control	MD12G1040800	Chr12	4514194	4515405	+	5.39919	-0.795998	8.0409	3.32258e-12	1.30452e-10	17.3193	plant U-box 24	RING-type E3 ubiquitin transferase	0	0	NA	U-box	Yes
Within-group	Bulk-R_Infected_vs_Control	MD16G1273500	Chr16	36329083	36329796	+	5.39819	1.43583	6.49488	4.44178e-09	6.16212e-08	10.5145	Protein of unknown function	NA	0	0	NA	DUF740	Yes
Within-group	Bulk-R_Infected_vs_Control	MD14G1206000	Chr14	29327106	29329754	+	5.39277	-1.36254	10.2324	9.22804e-17	2.31431e-14	27.1493	Plant protein of unknown function (DUF827)	Protein WEAK CHLOROPLAST MOVEMENT UNDER BLUE	0	0	NA	WEMBL	Yes
Within-group	Bulk-R_Infected_vs_Control	MD17G1056100	Chr17	4433867	4435408	+	5.38751	0.234217	6.93095	6.05848e-10	1.13052e-08	12.4288	HXXXD-type acyl-transferase family protein	phenolic glucoside malonyltransferase	0	0	ko00330,ko00943,ko00944,map00330,map00943,map00944	Transferase	Yes
Within-group	Bulk-R_Infected_vs_Control	MD11G1178500	Chr11	21454202	21461501	-	5.37422	-0.0892156	8.87019	6.32449e-14	4.76946e-12	21.1727	aldehyde oxidase 4	Indole-3-acetaldehyde oxidase-like	0	0	ko00380,ko00906,ko01100,ko01110,map00380,map00906,map01100,map01110	Ald_Xan_dh_C,Ald_Xan_dh_C2,CO_deh_flav_C,FAD_binding_5,Fer2,Fer2_2	Yes
Within-group	Bulk-R_Infected_vs_Control	MD09G1192100	Chr09	17088602	17092857	-	5.37339	6.74964	9.3932	5.14303e-15	6.23174e-13	23.5566	Glycosyl hydrolases family 32 protein	Belongs to the glycosyl hydrolase 32 family	0	0	ko00052,ko00500,ko01100,map00052,map00500,map01100	Glyco_hydro_32C,Glyco_hydro_32N	Yes
Within-group	Bulk-R_Infected_vs_Control	MD10G1244300	Chr10	33898149	33908051	+	5.36986	3.53264	4.88447	4.4692e-06	2.40619e-05	3.75557	FAD-binding Berberine family protein	Belongs to the oxygen-dependent FAD-linked oxidoreductase family	0	0	ko00940,ko01100,ko01110,map00940,map01100,map01110	BBE,FAD_binding_4	Yes
Within-group	Bulk-R_Infected_vs_Control	MD02G1118100	Chr02	9607312	9607884	+	2.08692	4.73736	6.69945	1.75287e-09	2.78258e-08	10.9085	Disease resistance-responsive (dirigent-like protein) family protein	Dirigent proteins impart stereoselectivity on the phenoxy radical-coupling reaction, yielding optically active lignans from two molecules of coniferyl alcohol in the biosynthesis of lignans, flavonolignans, and alkaloids and thus plays a central role in plant secondary metabolism	0	0	NA	Dirigent	Yes
Within-group	Bulk-R_Infected_vs_Control	MD05G1252100	Chr05	38376470	38377873	+	5.34671	-0.187918	8.84635	7.09043e-14	5.22528e-12	21.0543	Glutathione S-transferase family protein	Glutathione S-transferase omega-like 2	0	0	NA	GST_C_2,GST_N_2	Yes
Within-group	Bulk-R_Infected_vs_Control	MD06G1189100	Chr06	32608598	32612425	+	5.34531	-0.118848	5.72958	1.31486e-07	1.13345e-06	7.30355	WRKY DNA-binding protein 72	WRKY transcription factor	0	0	NA	WRKY	Yes
Within-group	Bulk-R_Infected_vs_Control	MD05G1021100	Chr05	3557447	3558986	+	5.34402	9.11238	12.7692	6.29249e-22	1.27234e-18	39.3376	extensin 3	NA	0	0	NA	NA	Yes
Within-group	Bulk-R_Infected_vs_Control	MD00G1045700	Chr00	8440990	8443828	-	5.34196	0.327384	4.89159	4.34337e-06	2.34781e-05	3.97386	Zinc-binding dehydrogenase family protein	2-alkenal reductase (NADP( )-dependent)-like	0	0	NA	ADH_N_2,ADH_zinc_N	Yes
Within-group	Bulk-R_Infected_vs_Control	MD03G1060100	Chr03	4847728	4848758	-	5.33636	0.847839	2.76161	0.0069694	0.0148877	-2.93037	Lateral organ boundaries (LOB) domain family protein	LOB domain-containing protein	0	0	NA	LOB	Yes
Within-group	Bulk-R_Infected_vs_Control	MD05G1099500	Chr05	20686386	20694651	-	5.33635	2.43772	3.65026	0.000438792	0.00133482	-0.483715	NA	NA	0	0	NA	NA	Yes
Within-group	Bulk-R_Infected_vs_Control	MD03G1011800	Chr03	911398	912378	-	5.32351	2.69847	3.40511	0.000989085	0.0027173	-1.33926	Late embryogenesis abundant protein (LEA) family protein	late embryogenesis abundant protein	0	0	NA	LEA_4	Yes
Within-group	Bulk-R_Infected_vs_Control	MD16G1178000	Chr16	15205059	15211504	+	5.3208	2.78335	3.95718	0.000150967	0.000525002	0.469062	inosine-uridine preferring nucleoside hydrolase family protein	inosine-uridine preferring nucleoside hydrolase	0	0	ko03013,map03013	IU_nuc_hydro	Yes
Within-group	Bulk-R_Infected_vs_Control	MD15G1028800	Chr15	1764019	1765906	-	5.32038	-1.05825	8.55427	2.87187e-13	1.66806e-11	19.6359	NA	UDP-glycosyltransferase 72E1-like	0	0	ko00940,map00940	UDPGT	Yes
Within-group	Bulk-R_Infected_vs_Control	MD15G1066300	Chr15	4612903	4613689	+	5.31999	0.81111	4.6244	1.24974e-05	5.88182e-05	2.93682	phytosulfokine 4 precursor	Phytosulfokines	0	0	NA	PSK	Yes
Within-group	Bulk-R_Infected_vs_Control	MD05G1092300	Chr05	19618797	19621192	+	5.31788	4.16245	4.19484	6.37753e-05	0.000246919	1.10262	Auxin-responsive GH3 family protein	Indole-3-acetic acid-amido synthetase	0	0	ko04075,map04075	GH3	Yes
Within-group	Bulk-R_Infected_vs_Control	MD01G1107100	Chr01	22001414	22005545	+	5.31251	-0.226948	5.36362	6.24907e-07	4.35993e-06	5.82213	Calcium-dependent lipid-binding (CaLB domain) family protein	Synaptotagmin-3-like	0	0	NA	C2,SMP_LBD	Yes
Within-group	Bulk-R_Infected_vs_Control	MD06G1093300	Chr06	22425810	22426385	+	5.3123	-0.559272	7.82953	9.05391e-12	3.07681e-10	16.3993	Late embryogenesis abundant (LEA) hydroxyproline-rich glycoprotein family	late embryogenesis abundant	0	0	NA	LEA_2	Yes
Within-group	Bulk-R_Infected_vs_Control	MD14G1192700	Chr14	28366495	28368035	-	5.30618	-1.31234	6.0114	3.84651e-08	3.95181e-07	8.46625	Major facilitator superfamily protein	Protein NRT1 PTR FAMILY	0	0	NA	PTR2	Yes
Within-group	Bulk-R_Infected_vs_Control	MD14G1174000	Chr14	26765666	26766345	+	5.2942	-0.189132	8.90988	5.22846e-14	4.06613e-12	21.3412	NA	NA	0	0	NA	NA	Yes
Within-group	Bulk-R_Infected_vs_Control	MD11G1157300	Chr11	15174056	15186238	+	5.28992	-0.958508	8.5572	2.83193e-13	1.64781e-11	19.6538	cytochrome P450	Cytochrome p450	0	0	NA	p450	Yes
Within-group	Bulk-R_Infected_vs_Control	MD09G1142300	Chr09	11105487	11107281	+	5.28549	1.09553	7.14731	2.22536e-10	4.85468e-09	13.3965	UDP-glucosyl transferase 85A3	UDP-Glycosyltransferase	0	0	NA	UDPGT	Yes
Within-group	Bulk-R_Infected_vs_Control	MD05G1169600	Chr05	29929323	29931598	+	5.2846	0.355642	3.71239	0.000355094	0.00111049	-0.159718	cytochrome P450	Cytochrome p450	0	0	ko00904,map00904	p450	No
Within-group	Bulk-R_Infected_vs_Control	MD13G1157400	Chr13	12290144	12295004	+	5.27429	4.64475	6.47013	4.96764e-09	6.7364e-08	10.2226	beta-xylosidase 1	beta-D-xylosidase	0	0	ko00520,ko01100,map00520,map01100	Fn3-like,Glyco_hydro_3,Glyco_hydro_3_C	Yes
Within-group	Bulk-R_Infected_vs_Control	MD16G1170900	Chr16	14319259	14320164	-	5.27391	3.18249	6.98408	4.741e-10	9.15159e-09	12.6065	soybean gene regulated by cold-2	Protein kinase C conserved region 2 (CalB)	0	0	ko00230,ko00240,ko01100,ko03020,ko05016,ko05168,ko05169,map00230,map00240,map01100,map03020,map05016,map05168,map05169	C2	Yes
Within-group	Bulk-R_Infected_vs_Control	MD08G1105900	Chr08	9111797	9114301	-	5.27301	-0.781814	3.41065	0.000971493	0.00267578	-1.005	phospholipase A 2A	Lipolytic acyl hydrolase (LAH)	0	0	NA	Patatin	No
Within-group	Bulk-R_Infected_vs_Control	MD15G1207800	Chr15	16526731	16527636	+	5.26874	1.44995	4.41753	2.77038e-05	0.000118398	2.17026	Protein of unknown function	Domain of unknown function (DUF4408)	0	0	NA	DUF4408,DUF761	Yes
Within-group	Bulk-R_Infected_vs_Control	MD04G1031400	Chr04	3512889	3515059	+	5.26806	5.76764	9.26079	9.70976e-15	1.03673e-12	23.0559	NA	NA	0	0	NA	NA	Yes
Within-group	Bulk-R_Infected_vs_Control	MD05G1108800	Chr05	22338251	22338490	-	5.26605	1.37264	2.94193	0.00414539	0.00946648	-2.47436	CAP (Cysteine-rich secretory proteins	Belongs to the CRISP family	0	0	ko04016,ko04075,ko04626,map04016,map04075,map04626	CAP	Yes
Within-group	Bulk-R_Infected_vs_Control	MD09G1018600	Chr09	1151487	1152080	-	5.26545	0.676836	7.59248	2.77224e-11	8.0078e-10	15.3953	Protein of unknown function	NA	0	0	NA	NA	Yes
Within-group	Bulk-R_Infected_vs_Control	MD07G1007400	Chr07	677223	678647	+	5.24193	3.80098	7.18903	1.83295e-10	4.10947e-09	13.5215	UDP-glucosyl transferase 73B3	Belongs to the UDP-glycosyltransferase family	0	0	ko00906,ko01100,ko01110,map00906,map01100,map01110	UDPGT	Yes
Within-group	Bulk-R_Infected_vs_Control	MD04G1031300	Chr04	3511526	3512850	-	5.23339	5.08681	8.3855	6.43411e-13	3.31459e-11	18.9845	NA	NA	0	0	NA	NA	Yes
Within-group	Bulk-R_Infected_vs_Control	MD00G1130600	Chr00	28196663	28198921	+	5.23237	2.89261	4.38288	3.15926e-05	0.000133205	1.94072	Transmembrane amino acid transporter family protein	vacuolar amino acid transporter	0	0	ko04721,ko04723,ko04727,ko05032,ko05033,map04721,map04723,map04727,map05032,map05033	Aa_trans	Yes
Within-group	Bulk-R_Infected_vs_Control	MD10G1324500	Chr10	40512430	40515449	-	5.23138	3.94513	8.72233	1.28462e-13	8.51642e-12	20.5967	WRKY family transcription factor	WRKY transcription factor	0	0	NA	WRKY	Yes
Within-group	Bulk-R_Infected_vs_Control	MD11G1213500	Chr11	31232215	31235905	+	5.21655	-0.923551	5.76847	1.11127e-07	9.78815e-07	7.46772	WRKY family transcription factor	WRKY transcription factor	0	0	NA	WRKY	Yes
Within-group	Bulk-R_Infected_vs_Control	MD09G1016300	Chr09	999464	1002082	-	5.21599	6.14986	8.93931	4.54042e-14	3.61802e-12	21.4242	lysine histidine transporter 1	Lysine histidine transporter	0	0	NA	Aa_trans	Yes
Within-group	Bulk-R_Infected_vs_Control	MD13G1122100	Chr13	8993050	8995368	-	5.20283	4.85419	8.92071	4.9639e-14	3.90735e-12	21.4636	WRKY DNA-binding protein 75	WRKY transcription factor	0	0	NA	WRKY	Yes
Within-group	Bulk-R_Infected_vs_Control	MD11G1015000	Chr11	1191890	1192138	-	5.20269	-0.451315	7.21292	1.64002e-10	3.7286e-09	13.6388	Protein of unknown function	NA	0	0	NA	NA	Yes
Within-group	Bulk-R_Infected_vs_Control	MD05G1184400	Chr05	31287827	31289215	+	5.1965	0.410903	5.32334	7.39788e-07	5.0323e-06	5.63	glutathione S-transferase TAU 8	Glutathione transferase GST 23-like	0	0	ko00480,ko00980,ko00982,ko00983,ko01524,ko05200,ko05204,ko05225,ko05418,map00480,map00980,map00982,map00983,map01524,map05200,map05204,map05225,map05418	GST_C,GST_C_2,GST_N	Yes
Within-group	Bulk-R_Infected_vs_Control	MD09G1143100	Chr09	11164178	11168107	-	5.19325	-1.25883	6.64714	2.22517e-09	3.38931e-08	11.1545	NA	NA	0	0	NA	NA	Yes
Within-group	Bulk-R_Infected_vs_Control	MD15G1073400	Chr15	4987521	4988834	-	5.18788	0.571146	4.84517	5.23035e-06	2.76536e-05	3.77902	NAD(P)-binding Rossmann-fold superfamily protein	3-oxo-Delta(4,5)-steroid 5-beta-reductase-like	0	0	NA	Epimerase	No
Within-group	Bulk-R_Infected_vs_Control	MD14G1041000	Chr14	3863148	3865742	+	5.18512	1.14675	6.53639	3.68077e-09	5.22053e-08	10.6967	syntaxin of plants 121	Belongs to the syntaxin family	0	0	ko04130,ko04721,map04130,map04721	SNARE,Syntaxin	Yes
Within-group	Bulk-R_Infected_vs_Control	MD01G1162900	Chr01	26802391	26804100	-	5.17448	-1.08584	4.32894	3.87153e-05	0.000159475	1.96846	LOB domain-containing protein 15	LOB domain-containing protein	0	0	NA	LOB	No
Within-group	Bulk-R_Infected_vs_Control	MD06G1223800	Chr06	35457551	35459148	-	5.17377	0.395586	6.22234	1.51071e-08	1.75998e-07	9.35649	S-adenosyl-L-methionine-dependent methyltransferases superfamily protein	S-adenosylmethionine-dependent methyltransferase	0	0	NA	Methyltransf_7	Yes
Within-group	Bulk-R_Infected_vs_Control	MD16G1158300	Chr16	12678643	12684435	+	5.15867	4.77842	2.88723	0.00486432	0.0108794	-3.04697	beta-xylosidase 1	beta-D-xylosidase	0	0	ko00520,ko01100,map00520,map01100	Fn3-like,Glyco_hydro_3,Glyco_hydro_3_C	No
Within-group	Bulk-R_Infected_vs_Control	MD15G1132300	Chr15	9591479	9593090	+	5.15761	-0.931249	4.52455	1.83981e-05	8.26918e-05	2.66605	Chalcone and stilbene synthase family protein	Belongs to the chalcone stilbene synthases family	0	0	ko00941,ko01100,ko01110,ko04712,map00941,map01100,map01110,map04712	Chal_sti_synt_C,Chal_sti_synt_N	Yes
Within-group	Bulk-R_Infected_vs_Control	MD11G1062700	Chr11	5439330	5441342	-	5.15226	4.76785	7.55255	3.34529e-11	9.44387e-10	15.0891	UDP-Glycosyltransferase superfamily protein	UDP-glycosyltransferase 87A1-like	0	0	NA	UDPGT	Yes
Within-group	Bulk-R_Infected_vs_Control	MD04G1146900	Chr04	23516338	23518944	-	5.15167	2.55337	6.19965	1.67144e-08	1.92169e-07	9.20454	phosphate transporter 4	anion transporter 3	0	0	NA	MFS_1	No
Within-group	Bulk-R_Infected_vs_Control	MD04G1031500	Chr04	3515061	3517248	+	5.14307	4.45649	6.50417	4.25903e-09	5.94683e-08	10.4236	Protein of unknown function	NA	0	0	NA	NA	Yes
Within-group	Bulk-R_Infected_vs_Control	MD00G1081500	Chr00	16235513	16237376	+	5.13794	-1.47694	8.82601	7.81646e-14	5.6446e-12	20.7994	fucosyltransferase 1	Galactoside 2-alpha-L-fucosyltransferase-like	0	0	NA	XG_FTase	Yes
Within-group	Bulk-R_Infected_vs_Control	MD15G1076000	Chr15	5176871	5177134	+	5.13303	-0.761823	5.00642	2.73208e-06	1.56605e-05	4.44766	Protein of unknown function	NA	0	0	NA	NA	Yes
Within-group	Bulk-R_Infected_vs_Control	MD07G1300900	Chr07	35965442	35968772	-	5.13303	1.48199	3.95824	0.000150395	0.000523237	0.592074	O-methyltransferase 1	Belongs to the class I-like SAM-binding methyltransferase superfamily. Cation-independent O- methyltransferase family	0	0	ko00940,ko00950,ko01100,ko01110,map00940,map00950,map01100,map01110	Dimerisation,Methyltransf_2	Yes
Within-group	Bulk-R_Infected_vs_Control	MD06G1195100	Chr06	32954957	32956373	-	5.12441	4.19312	5.01831	2.60326e-06	1.50206e-05	4.11197	expansin A1	Belongs to the expansin family	0	0	NA	DPBB_1,Pollen_allerg_1	Yes
Within-group	Bulk-R_Infected_vs_Control	MD09G1089800	Chr09	6573918	6575395	+	5.11691	3.22345	6.50347	4.27255e-09	5.95799e-08	10.4888	O-methyltransferase family protein	Belongs to the class I-like SAM-binding methyltransferase superfamily. Cation-independent O- methyltransferase family	0	0	NA	Dimerisation,Methyltransf_2	No
Within-group	Bulk-R_Infected_vs_Control	MD02G1302900	Chr02	35689520	35693804	+	5.11295	5.77523	11.2782	6.42816e-19	3.78116e-16	32.5312	NAD(P)-binding Rossmann-fold superfamily protein	NA	0	0	NA	NA	Yes
Within-group	Bulk-R_Infected_vs_Control	MD01G1122500	Chr01	23568825	23572023	-	5.10879	-1.50273	7.14743	2.22413e-10	4.85468e-09	13.3148	basic helix-loop-helix (bHLH) DNA-binding superfamily protein	helix loop helix domain	0	0	ko04360,ko04666,ko04810,ko05133,map04360,map04666,map04810,map05133	NA	Yes
Within-group	Bulk-R_Infected_vs_Control	MD07G1300400	Chr07	35930715	35931194	+	5.10813	-1.64444	5.6515	1.84045e-07	1.51661e-06	6.99043	NA	NA	0	0	NA	NA	Yes
Within-group	Bulk-R_Infected_vs_Control	MD08G1082000	Chr08	6761669	6762460	+	5.10612	-0.0899952	8.82667	7.79166e-14	5.63928e-12	20.987	ZCF37	NA	0	0	NA	NA	Yes
Within-group	Bulk-R_Infected_vs_Control	MD09G1030100	Chr09	1852886	1854512	+	5.09786	-0.942032	5.36471	6.2205e-07	4.3452e-06	5.83786	Pectin lyase-like superfamily protein	Polygalacturonase	0	0	ko00040,ko01100,map00040,map01100	Glyco_hydro_28	Yes
Within-group	Bulk-R_Infected_vs_Control	MD09G1141200	Chr09	11049137	11050830	-	5.09722	5.63023	10.1576	1.31889e-16	3.0697e-14	27.2685	UDP-Glycosyltransferase superfamily protein	Belongs to the UDP-glycosyltransferase family	0	0	NA	UDPGT	Yes
Within-group	Bulk-R_Infected_vs_Control	MD10G1080000	Chr10	11729498	11732735	-	5.09657	6.07396	8.1249	2.22853e-12	9.24326e-11	17.5545	polyol/monosaccharide transporter 5	Belongs to the major facilitator superfamily. Sugar transporter (TC 2.A.1.1) family	0	0	NA	Sugar_tr	Yes
Within-group	Bulk-R_Infected_vs_Control	MD10G1338700	Chr10	41476099	41479011	-	5.09222	0.146839	8.35372	7.48799e-13	3.75002e-11	18.8364	nudix hydrolase homolog 2	Nudix hydrolase	0	0	NA	NUDIX	Yes
Within-group	Bulk-R_Infected_vs_Control	MD01G1032800	Chr01	11387617	11393024	+	5.07257	2.1542	6.29161	1.10863e-08	1.3378e-07	9.60806	MATE efflux family protein	Belongs to the multi antimicrobial extrusion (MATE) (TC 2.A.66.1) family	0	0	NA	MatE	Yes
Within-group	Bulk-R_Infected_vs_Control	MD09G1072200	Chr09	4964673	4969705	-	5.07039	4.357	6.08222	2.81433e-08	3.0089e-07	8.58163	cellulose synthase-like B3	Belongs to the glycosyltransferase 2 family	0	0	NA	Cellulose_synt	Yes
Within-group	Bulk-R_Infected_vs_Control	MD09G1199000	Chr09	18172529	18173200	+	5.06807	0.985924	4.20086	6.23732e-05	0.000242245	1.42149	cryptdin protein-related	NA	0	0	NA	NA	No
Within-group	Bulk-R_Infected_vs_Control	MD02G1179300	Chr02	15907997	15908611	-	5.05309	1.55734	4.09764	9.1049e-05	0.000337606	1.02328	Protein of unknown function	NA	0	0	NA	NA	Yes
Within-group	Bulk-R_Infected_vs_Control	MD10G1098800	Chr10	15872551	15873243	-	5.04954	0.13411	6.72045	1.59247e-09	2.54417e-08	11.5027	Plant basic secretory protein (BSP) family protein	Peptidase of plants and bacteria	0	0	NA	BSP	Yes
Within-group	Bulk-R_Infected_vs_Control	MD02G1001900	Chr02	158311	160383	-	5.04539	4.97656	6.14094	2.1698e-08	2.41228e-07	8.65512	Zinc-binding dehydrogenase family protein	2-alkenal reductase (NADP( )-dependent)-like	0	0	NA	ADH_N_2,ADH_zinc_N	Yes
Within-group	Bulk-R_Infected_vs_Control	MD03G1057500	Chr03	4600406	4603342	+	5.04499	-2.17703	6.23917	1.40143e-08	1.65229e-07	9.40683	cytochrome P450	Belongs to the cytochrome P450 family	0	0	ko00460,ko00966,ko01110,ko01210,map00460,map00966,map01110,map01210	p450	No
Within-group	Bulk-R_Infected_vs_Control	MD12G1142700	Chr12	22193154	22194061	+	5.03376	-1.87034	7.48322	4.63345e-11	1.25336e-09	14.7915	Calcium-dependent lipid-binding (CaLB domain) family protein	Protein kinase C conserved region 2 (CalB)	0	0	NA	C2	Yes
Within-group	Bulk-R_Infected_vs_Control	MD10G1111300	Chr10	18283281	18285122	+	5.01704	-1.44982	6.58439	2.96043e-09	4.34358e-08	10.8836	Uridine diphosphate glycosyltransferase 74E2	UDP-glycosyltransferase	0	0	NA	UDPGT	Yes
Within-group	Bulk-R_Infected_vs_Control	MD11G1288500	Chr11	40818002	40823151	-	5.01018	3.67472	6.59921	2.76762e-09	4.08663e-08	10.8638	Phenazine biosynthesis PhzC/PhzF protein	Phenazine biosynthesis-like domain-containing protein	0	0	NA	PhzC-PhzF	Yes
Within-group	Bulk-R_Infected_vs_Control	MD08G1112100	Chr08	9904787	9905281	+	5.00785	-0.0218119	6.85343	8.65675e-10	1.52043e-08	12.0818	Polyketide cyclase/dehydrase and lipid transport superfamily protein	Polyketide cyclase / dehydrase and lipid transport	0	0	NA	Polyketide_cyc2	No
Within-group	Bulk-R_Infected_vs_Control	MD00G1038300	Chr00	6690882	6695677	+	4.99762	1.63826	7.02704	3.88686e-10	7.71457e-09	12.8552	Protein kinase superfamily protein	wall-associated receptor kinase-like	0	0	ko04010,ko04064,ko04620,ko04621,ko04624,ko04722,ko05133,ko05140,ko05142,ko05145,ko05152,ko05162,ko05164,map04010,map04064,map04620,map04621,map04624,map04722,map05133,map05140,map05142,map05145,map05152,map05162,map05164	GUB_WAK_bind,Pkinase,Pkinase_Tyr	Yes
Within-group	Bulk-R_Infected_vs_Control	MD13G1112700	Chr13	8183162	8185070	+	4.99378	1.06829	7.79034	1.08985e-11	3.60889e-10	16.3013	cytochrome P450	Belongs to the cytochrome P450 family	0	0	NA	p450	Yes
Within-group	Bulk-R_Infected_vs_Control	MD09G1141100	Chr09	11036513	11037928	-	4.99304	6.22122	9.19325	1.34269e-14	1.34543e-12	22.6237	UDP-glucosyl transferase 71B6	Belongs to the UDP-glycosyltransferase family	0	0	NA	UDPGT	Yes
Within-group	Bulk-R_Infected_vs_Control	MD15G1340700	Chr15	38538700	38539565	+	4.98455	6.87845	12.6245	1.22114e-21	2.1948e-18	38.6913	catalytic LigB subunit of aromatic ring-opening dioxygenase family	4,5-DOPA dioxygenase extradiol-like	0	0	ko00965,map00965	LigB	Yes
Within-group	Bulk-R_Infected_vs_Control	MD06G1002600	Chr06	254411	257948	-	4.98257	4.66656	6.91848	6.4168e-10	1.18762e-08	12.1058	Auxin efflux carrier family protein	Encoded by	0	0	NA	Mem_trans	Yes
Within-group	Bulk-R_Infected_vs_Control	MD10G1021800	Chr10	2699870	2700808	+	4.97896	10.2783	13.8284	5.27175e-24	2.43645e-20	44.1134	NA	NA	0	0	NA	NA	Yes
Within-group	Bulk-R_Infected_vs_Control	MD11G1173500	Chr11	20011545	20012786	+	4.97359	0.587341	6.18249	1.80405e-08	2.05221e-07	9.17966	plant U-box 23	RING-type E3 ubiquitin transferase	0	0	NA	U-box	Yes
Within-group	Bulk-R_Infected_vs_Control	MD17G1099500	Chr17	8453194	8456269	+	4.97017	3.1731	4.63651	1.19208e-05	5.65156e-05	2.81008	cellulose synthase-like B3	Belongs to the glycosyltransferase 2 family	0	0	NA	Cellulose_synt	No
Within-group	Bulk-R_Infected_vs_Control	MD17G1131800	Chr17	11642497	11645674	+	4.96945	0.395433	4.65367	1.11479e-05	5.33088e-05	3.06569	MATE efflux family protein	Belongs to the multi antimicrobial extrusion (MATE) (TC 2.A.66.1) family	0	0	NA	MatE	Yes
Within-group	Bulk-R_Infected_vs_Control	MD01G1201900	Chr01	29791492	29792585	-	4.968	3.7964	3.43141	0.000908085	0.00252739	-1.42834	PAR1 protein	PAR1 protein	0	0	NA	PAR1	Yes
Within-group	Bulk-R_Infected_vs_Control	MD12G1121200	Chr12	19428139	19432501	+	4.96151	0.88699	6.40842	6.56189e-09	8.54206e-08	10.1445	Seven transmembrane MLO family protein	MLO-like protein	0	0	NA	Mlo	Yes
Within-group	Bulk-R_Infected_vs_Control	MD13G1161700	Chr13	12732001	12733718	+	4.96145	-0.0412781	5.55294	2.80582e-07	2.19578e-06	6.57555	MLP-like protein 423	Major allergen Pru ar	0	0	NA	Bet_v_1	Yes
Within-group	Bulk-R_Infected_vs_Control	MD01G1143100	Chr01	25275382	25277334	+	4.95524	4.7256	9.70939	1.12836e-15	1.78129e-13	25.2141	UDP-Glycosyltransferase superfamily protein	UDP-glycosyltransferase 76F1-like	0	0	ko00140,ko00380,ko00402,ko00830,ko00908,ko00980,ko01100,ko01110,ko04913,ko05204,map00140,map00380,map00402,map00830,map00908,map00980,map01100,map01110,map04913,map05204	UDPGT	Yes
Within-group	Bulk-R_Infected_vs_Control	MD09G1162800	Chr09	13223982	13226358	+	4.95289	0.254883	4.20958	6.03984e-05	0.000235536	1.48008	NA	NA	0	0	NA	NA	Yes
Within-group	Bulk-R_Infected_vs_Control	MD09G1073100	Chr09	5068880	5072015	+	4.94909	1.35656	7.7865	1.10985e-11	3.66012e-10	16.2876	PLC-like phosphodiesterases superfamily protein	PI-PLC X domain-containing protein	0	0	NA	NA	Yes
Within-group	Bulk-R_Infected_vs_Control	MD17G1160500	Chr17	15694687	15700441	+	4.92882	5.91008	8.96126	4.08674e-14	3.32197e-12	21.5391	Terpenoid cyclases family protein	Belongs to the terpene cyclase mutase family	0	0	ko00909,ko01110,map00909,map01110	SQHop_cyclase_C,SQHop_cyclase_N	Yes
Within-group	Bulk-R_Infected_vs_Control	MD11G1159100	Chr11	15487893	15494883	-	4.91964	7.74601	12.2284	7.57825e-21	9.80686e-18	36.8577	pleiotropic drug resistance 6	Pleiotropic drug resistance protein 2-like	0	0	NA	ABC2_membrane,ABC_tran,ABC_trans_N,PDR_assoc	Yes
Within-group	Bulk-R_Infected_vs_Control	MD01G1213300	Chr01	30670365	30671312	-	4.91375	9.62407	7.42391	6.11969e-11	1.59023e-09	14.2123	chitinase A	Belongs to the glycosyl hydrolase 18 family	0	0	ko00520,ko01100,map00520,map01100	Glyco_hydro_18	Yes
Within-group	Bulk-R_Infected_vs_Control	MD13G1191400	Chr13	16398050	16401705	-	4.9128	5.56509	7.69203	1.73404e-11	5.41501e-10	15.6265	Haloacid dehalogenase-like hydrolase (HAD) superfamily protein	Haloacid dehalogenase-like hydrolase	0	0	NA	HAD_2,Hydrolase,Hydrolase_like	Yes
Within-group	Bulk-R_Infected_vs_Control	MD15G1400700	Chr15	50171057	50173317	-	4.89213	-0.216807	8.57757	2.56887e-13	1.51657e-11	19.8427	12-oxophytodienoate reductase 2	12-oxophytodienoate reductase	0	0	ko00592,ko01100,ko01110,map00592,map01100,map01110	Oxidored_FMN	Yes
Within-group	Bulk-R_Infected_vs_Control	MD05G1279400	Chr05	41365088	41366796	-	4.89116	2.6333	6.31661	9.91204e-09	1.21284e-07	9.69587	NA	NA	0	0	NA	NA	Yes
Within-group	Bulk-R_Infected_vs_Control	MD09G1111700	Chr09	8492767	8495591	-	4.88827	0.190733	5.56469	2.66865e-07	2.09604e-06	6.6159	RNAse II-like 1	Ribonuclease 3-like protein	0	0	NA	Ribonucleas_3_3,Ribonuclease_3,dsrm	Yes
Within-group	Bulk-R_Infected_vs_Control	MD13G1040500	Chr13	2751216	2752127	+	4.88198	3.38045	4.81613	5.87236e-06	3.04971e-05	3.49584	Protein of unknown function	NA	0	0	NA	NA	Yes
Within-group	Bulk-R_Infected_vs_Control	MD04G1052600	Chr04	6196277	6197888	-	4.88004	-1.17875	3.85509	0.00021656	0.000718947	0.383524	expansin-like B1	Belongs to the expansin family	0	0	NA	DPBB_1,Pollen_allerg_1	No
Within-group	Bulk-R_Infected_vs_Control	MD01G1168100	Chr01	27253523	27254652	+	4.87679	-1.1633	9.03913	2.81285e-14	2.4796e-12	21.8419	response regulator 17	two-component response regulator	0	0	ko04075,map04075	Response_reg	Yes
Within-group	Bulk-R_Infected_vs_Control	MD13G1116100	Chr13	8446303	8448615	-	4.87209	5.09772	14.1802	1.10879e-24	8.96789e-21	45.6932	cytochrome P450	Belongs to the cytochrome P450 family	0	0	NA	p450	Yes
Within-group	Bulk-R_Infected_vs_Control	MD16G1225400	Chr16	22722085	22724326	+	4.86369	-0.184596	4.05222	0.000107348	0.000389649	0.982635	seed gene 1	Caleosin related protein	0	0	ko00073,map00073	Caleosin	Yes
Within-group	Bulk-R_Infected_vs_Control	MD04G1134900	Chr04	22219294	22220752	+	4.86098	-0.206719	5.76851	1.11112e-07	9.78815e-07	7.46288	NAD(P)-binding Rossmann-fold superfamily protein	Tropinone reductase homolog	0	0	ko00960,ko01100,ko01110,map00960,map01100,map01110	adh_short,adh_short_C2	Yes
Within-group	Bulk-R_Infected_vs_Control	MD11G1178400	Chr11	21372145	21386878	-	4.85422	5.60533	12.5512	1.70951e-21	2.76104e-18	38.4211	aldehyde oxidase 4	Indole-3-acetaldehyde oxidase-like	0	0	ko00380,ko00906,ko01100,ko01110,map00380,map00906,map01100,map01110	Ald_Xan_dh_C,Ald_Xan_dh_C2,CO_deh_flav_C,FAD_binding_5,Fer2,Fer2_2	Yes
Within-group	Bulk-R_Infected_vs_Control	MD10G1021700	Chr10	2698855	2699839	-	4.8492	8.87522	13.1769	9.83764e-23	3.18267e-19	41.1811	NA	NA	0	0	NA	Extensin_2	Yes
Within-group	Bulk-R_Infected_vs_Control	MD04G1239000	Chr04	31721180	31723335	+	4.84877	3.45586	4.55048	1.66477e-05	7.57294e-05	2.4529	wall associated kinase-like 4	wall-associated receptor kinase-like	0	0	NA	LysM,Pkinase,Pkinase_Tyr	Yes
Within-group	Bulk-R_Infected_vs_Control	MD14G1044100	Chr14	4164312	4165001	-	4.84157	-1.67573	8.17148	1.78535e-12	7.75296e-11	17.8426	Protein of unknown function	NA	0	0	NA	NA	Yes
Within-group	Bulk-R_Infected_vs_Control	MD07G1152600	Chr07	22231518	22232232	-	4.83983	-1.05627	6.77692	1.2298e-09	2.04452e-08	11.729	LOB domain-containing protein 1	Lateral organ boundaries (LOB) domain	0	0	NA	LOB	Yes
Within-group	Bulk-R_Infected_vs_Control	MD13G1148400	Chr13	11634222	11639701	-	4.83879	-0.000540778	4.3134	4.10396e-05	0.000167853	1.87704	gibberellin 2-oxidase 6	Belongs to the iron ascorbate-dependent oxidoreductase family	0	0	ko00904,ko01110,map00904,map01110	2OG-FeII_Oxy,DIOX_N	No
Within-group	Bulk-R_Infected_vs_Control	MD05G1109100	Chr05	22379912	22380397	-	4.83631	5.20616	3.7937	0.000268275	0.000869925	-0.453301	CAP (Cysteine-rich secretory proteins	Belongs to the CRISP family	0	0	ko04016,ko04075,ko04626,map04016,map04075,map04626	CAP	Yes
Within-group	Bulk-R_Infected_vs_Control	MD10G1179100	Chr10	27285865	27288648	+	4.83564	-1.42818	4.2206	5.79849e-05	0.00022729	1.5987	polygalacturonase abscission zone A. thaliana	Polygalacturonase-like	0	0	ko00040,ko01100,map00040,map01100	Glyco_hydro_28	Yes
Within-group	Bulk-R_Infected_vs_Control	MD11G1214100	Chr11	31271770	31273047	-	4.82081	-0.706223	6.4489	5.4673e-09	7.29688e-08	10.3219	Protein of unknown function	f-box protein	0	0	NA	Chloroplast_duf	Yes
Within-group	Bulk-R_Infected_vs_Control	MD09G1032800	Chr09	1991689	1994157	+	4.81708	0.197995	3.05409	0.00296774	0.00705505	-2.08167	NAD(P)-linked oxidoreductase superfamily protein	reductase	0	0	NA	Aldo_ket_red	Yes
Within-group	Bulk-R_Infected_vs_Control	MD09G1073000	Chr09	5065651	5066595	+	4.8169	1.21004	4.43248	2.61728e-05	0.000112689	2.20507	B12D protein	NADH-ubiquinone reductase complex 1 MLRQ subunit	0	0	NA	B12D	Yes
Within-group	Bulk-R_Infected_vs_Control	MD00G1150400	Chr00	33219886	33223042	-	4.81641	-1.09302	6.23544	1.42496e-08	1.67662e-07	9.4064	Leucine-rich repeat protein kinase family protein	LRR receptor-like serine threonine-protein kinase At3g47570	0	0	ko04010,ko04064,ko04620,ko04624,ko04722,ko05133,ko05140,ko05142,ko05145,ko05152,ko05162,ko05169,map04010,map04064,map04620,map04624,map04722,map05133,map05140,map05142,map05145,map05152,map05162,map05169	LRRNT_2,LRR_1,LRR_6,LRR_8,Pkinase,Pkinase_Tyr	Yes
Within-group	Bulk-R_Infected_vs_Control	MD05G1198800	Chr05	32666145	32666621	+	4.81312	-1.67437	7.47501	4.81557e-11	1.29504e-09	14.7404	Integrase-type DNA-binding superfamily protein	transcription factor	0	0	NA	AP2	Yes
Within-group	Bulk-R_Infected_vs_Control	MD04G1064200	Chr04	8643210	8643887	-	4.81264	4.88155	3.60603	0.000509441	0.00152085	-0.984674	osmotin 34	Thaumatin family	0	0	NA	Thaumatin	Yes
Within-group	Bulk-R_Infected_vs_Control	MD16G1109400	Chr16	7673350	7674678	-	4.81173	2.44155	7.45941	5.18131e-11	1.3785e-09	14.7948	HXXXD-type acyl-transferase family protein	BAHD acyltransferase At5g47980-like	0	0	ko00940,ko00941,ko00945,ko01100,ko01110,map00940,map00941,map00945,map01100,map01110	Transferase	Yes
Within-group	Bulk-R_Infected_vs_Control	MD03G1226300	Chr03	31171786	31172609	+	4.80918	1.51342	5.96444	4.72843e-08	4.71787e-07	8.23173	Dynein light chain type 1 family protein	Dynein light chain	0	0	ko04962,map04962	Dynein_light	Yes
Within-group	Bulk-R_Infected_vs_Control	MD09G1161300	Chr09	13035744	13038232	-	4.80516	3.26959	6.04115	3.37393e-08	3.52904e-07	8.46809	Core-2/I-branching beta-1	Xylosyltransferase 1-like	0	0	ko00532,ko00534,ko01100,map00532,map00534,map01100	Branch	Yes
Within-group	Bulk-R_Infected_vs_Control	MD14G1244100	Chr14	32245728	32248695	+	4.80353	1.25741	5.58088	2.49047e-07	1.97431e-06	6.65792	Nucleotide-diphospho-sugar transferase family protein	At4g15970-like	0	0	NA	Nucleotid_trans	No
Within-group	Bulk-R_Infected_vs_Control	MD06G1027300	Chr06	3351729	3355059	+	4.80237	4.76117	6.72666	1.54791e-09	2.48649e-08	11.2465	xyloglucan endotransglucosylase/hydrolase 30	Catalyzes xyloglucan endohydrolysis (XEH) and or endotransglycosylation (XET). Cleaves and religates xyloglucan polymers, an essential constituent of the primary cell wall, and thereby participates in cell wall construction of growing tissues	0	0	NA	Glyco_hydro_16,XET_C	Yes
Within-group	Bulk-R_Infected_vs_Control	MD02G1019700	Chr02	1412696	1414606	+	4.79962	1.68113	7.59629	2.72303e-11	7.88678e-10	15.4232	2-oxoglutarate (2OG) and Fe(II)-dependent oxygenase superfamily protein	Belongs to the iron ascorbate-dependent oxidoreductase family	0	0	NA	2OG-FeII_Oxy,DIOX_N	Yes
Within-group	Bulk-R_Infected_vs_Control	MD11G1062400	Chr11	5415423	5415968	-	4.79943	2.64965	7.39251	7.08929e-11	1.79763e-09	14.4852	UDP-Glycosyltransferase superfamily protein	UDP-Glycosyltransferase	0	0	NA	UDPGT	Yes
Within-group	Bulk-R_Infected_vs_Control	MD03G1259900	Chr03	34685140	34691441	+	4.79871	6.2496	8.87878	6.06953e-14	4.6175e-12	21.0968	sulfate transporter 3	Sulfate transporter 3.1-like	0	0	NA	STAS,Sulfate_transp	Yes
Within-group	Bulk-R_Infected_vs_Control	MD15G1158600	Chr15	11783271	11783663	+	4.79762	1.04228	3.30648	0.00135756	0.00358002	-1.47633	Protein of unknown function	NA	0	0	NA	NA	Yes
Within-group	Bulk-R_Infected_vs_Control	MD03G1019800	Chr03	1541361	1543790	+	4.79195	0.553981	4.72629	8.38265e-06	4.15944e-05	3.32643	receptor-like protein kinase 1	G-type lectin S-receptor-like serine threonine-protein kinase	0	0	NA	B_lectin,PAN_2,Pkinase,Pkinase_Tyr,S_locus_glycop	Yes
Within-group	Bulk-R_Infected_vs_Control	MD15G1401100	Chr15	50208509	50210852	-	4.77974	1.31429	5.08216	2.00648e-06	1.19305e-05	4.65419	12-oxophytodienoate reductase 2	12-oxophytodienoate reductase	0	0	ko00592,ko01100,ko01110,map00592,map01100,map01110	Oxidored_FMN	Yes
Within-group	Bulk-R_Infected_vs_Control	MD13G1085700	Chr13	6025712	6026880	+	4.77952	2.53853	5.42678	4.79081e-07	3.46429e-06	5.93463	matrix metalloproteinase	Belongs to the peptidase M10A family	0	0	NA	PG_binding_1,Peptidase_M10	Yes
Within-group	Bulk-R_Infected_vs_Control	MD08G1231900	Chr08	29829091	29831766	+	4.77905	-0.917738	4.04732	0.000109265	0.000395672	1.00755	RmlC-like cupins superfamily protein	11S globulin seed storage protein	0	0	NA	Cupin_1	Yes
Within-group	Bulk-R_Infected_vs_Control	MD12G1194200	Chr12	27576231	27576848	-	4.77434	0.465495	4.405	2.90542e-05	0.000123484	2.15953	calmodulin like 42	Calcium-binding protein CML42-like	0	0	ko04626,map04626	EF-hand_1,EF-hand_5,EF-hand_6	Yes
Within-group	Bulk-R_Infected_vs_Control	MD05G1210400	Chr05	34178564	34182130	+	4.77268	-1.20644	5.53801	2.98999e-07	2.32276e-06	6.53423	glutathione S-transferase TAU 19	Glutathione S-transferase	0	0	ko00480,ko00980,ko00982,ko00983,ko01524,ko05200,ko05204,ko05225,ko05418,map00480,map00980,map00982,map00983,map01524,map05200,map05204,map05225,map05418	GST_C,GST_C_2,GST_N,GST_N_3	Yes
Within-group	Bulk-R_Infected_vs_Control	MD09G1034000	Chr09	2082430	2084487	-	4.77015	2.81701	2.4436	0.0164889	0.0314348	-3.82835	Oxidoreductase	2-methylene-furan-3-one reductase-like	0	0	NA	ADH_N,ADH_zinc_N,ADH_zinc_N_2	Yes
Within-group	Bulk-R_Infected_vs_Control	MD11G1063200	Chr11	5480264	5481344	-	4.76442	-1.70903	6.27887	1.17366e-08	1.40787e-07	9.58468	Lateral organ boundaries (LOB) domain family protein	LOB domain-containing protein	0	0	NA	LOB	Yes
Within-group	Bulk-R_Infected_vs_Control	MD01G1202600	Chr01	29843134	29846073	+	4.76405	1.5035	3.7346	0.000329041	0.00103906	-0.179852	cytochrome P450	Belongs to the cytochrome P450 family	0	0	NA	p450	Yes
Within-group	Bulk-R_Infected_vs_Control	MD05G1184600	Chr05	31293253	31293648	+	4.75619	0.367663	7.24184	1.43329e-10	3.31687e-09	13.8165	glutathione S-transferase tau 7	Glutathione transferase GST 23-like	0	0	ko00480,ko00980,ko00982,ko00983,ko01524,ko05200,ko05204,ko05225,ko05418,map00480,map00980,map00982,map00983,map01524,map05200,map05204,map05225,map05418	GST_C,GST_C_2,GST_N	Yes
Within-group	Bulk-R_Infected_vs_Control	MD05G1219000	Chr05	34957502	34958878	-	4.74818	2.08188	4.16438	7.13392e-05	0.000272681	1.20046	HXXXD-type acyl-transferase family protein	BAHD acyltransferase At5g47980-like	0	0	ko00940,ko00941,ko00945,ko01100,ko01110,map00940,map00941,map00945,map01100,map01110	Transferase	Yes
Within-group	Bulk-R_Infected_vs_Control	MD09G1201500	Chr09	18606757	18607959	+	4.74294	-0.390161	4.71803	8.66024e-06	4.28207e-05	3.34733	oxidative stress 3	RNA binding	0	0	NA	NA	No
Within-group	Bulk-R_Infected_vs_Control	MD01G1091400	Chr01	20636289	20639121	+	4.7424	0.862197	8.31256	9.11345e-13	4.46049e-11	18.6886	pyrophosphorylase 1	Soluble inorganic	0	0	ko00190,map00190	Pyrophosphatase	Yes
Within-group	Bulk-R_Infected_vs_Control	MD17G1207500	Chr17	25021809	25022096	+	4.7399	-1.3399	3.99902	0.000130003	0.000460664	0.857849	Protein of unknown function	Cotton fibre expressed protein	0	0	NA	DUF761	No
Within-group	Bulk-R_Infected_vs_Control	MD00G1106800	Chr00	22438655	22440725	+	4.7369	-0.646971	3.29283	0.00141768	0.00372098	-1.36096	Lactoylglutathione lyase / glyoxalase I family protein	Glyoxalase/Bleomycin resistance protein/Dioxygenase superfamily	0	0	NA	Glyoxalase	No
Within-group	Bulk-R_Infected_vs_Control	MD11G1062500	Chr11	5415970	5432873	-	4.72797	3.55495	8.18276	1.69198e-12	7.47798e-11	18.0941	UDP-Glycosyltransferase superfamily protein	UDP-Glycosyltransferase	0	0	NA	UDPGT	Yes
Within-group	Bulk-R_Infected_vs_Control	MD09G1140700	Chr09	11019417	11020832	-	4.72166	4.97735	7.52907	3.73579e-11	1.041e-09	14.9105	UDP-Glycosyltransferase superfamily protein	Belongs to the UDP-glycosyltransferase family	0	0	NA	UDPGT	Yes
Within-group	Bulk-R_Infected_vs_Control	MD06G1047600	Chr06	6451318	6453328	+	4.71996	0.517583	3.50306	0.000717957	0.00205807	-0.848403	expansin-like B1	Belongs to the expansin family	0	0	NA	DPBB_1,Pollen_allerg_1	No
Within-group	Bulk-R_Infected_vs_Control	MD03G1292500	Chr03	36943314	36945509	-	4.71953	-1.00177	5.44773	4.38502e-07	3.2038e-06	6.17576	MLP-like protein 423	Belongs to the BetVI family	0	0	NA	Bet_v_1	Yes
Within-group	Bulk-R_Infected_vs_Control	MD08G1105100	Chr08	8932148	8934369	+	4.71893	0.0844958	4.29648	4.37227e-05	0.000177502	1.79113	phospholipase A 2A	Lipolytic acyl hydrolase (LAH)	0	0	NA	Patatin	No
Within-group	Bulk-R_Infected_vs_Control	MD11G1220400	Chr11	32346817	32348920	+	4.7051	-1.431	6.44671	5.52177e-09	7.35448e-08	10.2986	Cytochrome P450 superfamily protein	Cytochrome p450	0	0	NA	p450	No
Within-group	Bulk-R_Infected_vs_Control	MD11G1231700	Chr11	33715314	33717614	+	4.70382	5.47701	9.71706	1.08762e-15	1.74192e-13	25.1722	FAD/NAD(P)-binding oxidoreductase family protein	Zeaxanthin epoxidase, chloroplastic-like	0	0	NA	FAD_binding_3	Yes
Within-group	Bulk-R_Infected_vs_Control	MD17G1051600	Chr17	4033937	4035671	+	4.70224	1.83744	6.77829	1.22213e-09	2.03282e-08	11.7454	NAC domain containing protein 100	NAC domain-containing protein	0	0	NA	NAM	Yes
Within-group	Bulk-R_Infected_vs_Control	MD10G1187000	Chr10	28108962	28110702	-	4.69453	4.61615	6.68674	1.85752e-09	2.92716e-08	11.1276	2-oxoglutarate (2OG) and Fe(II)-dependent oxygenase superfamily protein	Belongs to the iron ascorbate-dependent oxidoreductase family	0	0	NA	2OG-FeII_Oxy,DIOX_N	Yes
Within-group	Bulk-R_Infected_vs_Control	MD08G1008500	Chr08	651182	652226	+	4.69062	-1.59813	3.70434	0.000365015	0.00113723	-0.092021	NA	NA	0	0	NA	NA	Yes
Within-group	Bulk-R_Infected_vs_Control	MD04G1222300	Chr04	30322367	30325055	+	4.68756	0.462246	7.20945	1.6667e-10	3.77863e-09	13.6726	Protein of unknown function	NA	0	0	NA	NA	Yes
Within-group	Bulk-R_Infected_vs_Control	MD05G1002900	Chr05	1070694	1072199	+	4.68714	6.43129	9.71031	1.12342e-15	1.78129e-13	25.0345	Leucine-rich repeat (LRR) family protein	Leucine-rich repeat receptor-like protein kinase	0	0	NA	LRRNT_2,LRR_1,LRR_8	Yes
Within-group	Bulk-R_Infected_vs_Control	MD10G1196300	Chr10	29448059	29449491	+	4.68693	0.934544	2.97784	0.00372814	0.00862297	-2.34113	glutathione S-transferase TAU 19	Glutathione S-transferase	0	0	ko00480,ko00980,ko00982,ko00983,ko01524,ko05200,ko05204,ko05225,ko05418,map00480,map00980,map00982,map00983,map01524,map05200,map05204,map05225,map05418	GST_C,GST_C_2,GST_N,GST_N_3	No
Within-group	Bulk-R_Infected_vs_Control	MD07G1038500	Chr07	3168014	3169998	-	4.67899	-0.734297	8.27772	1.07608e-12	5.08968e-11	18.4051	response regulator 9	Two-component response regulator	0	0	ko04075,map04075	Response_reg	Yes
Within-group	Bulk-R_Infected_vs_Control	MD16G1212000	Chr16	20067024	20068045	+	4.67843	-2.06296	7.12029	2.52291e-10	5.38398e-09	13.1712	cellulose synthase like G2	Belongs to the glycosyltransferase 2 family	0	0	NA	Cellulose_synt	Yes
Within-group	Bulk-R_Infected_vs_Control	MD07G1292500	Chr07	35367055	35370360	-	4.67779	-0.573574	5.07097	2.10044e-06	1.24206e-05	4.69354	cyclic nucleotide gated channel 1	Cyclic nucleotide-gated ion channel 1-like	0	0	ko04626,map04626	Ion_trans	Yes
Within-group	Bulk-R_Infected_vs_Control	MD13G1004500	Chr13	273991	280268	-	4.67189	4.29407	8.39765	6.07128e-13	3.16491e-11	19.0435	serine carboxypeptidase-like 35	Belongs to the peptidase S10 family	0	0	NA	Peptidase_S10	Yes
Within-group	Bulk-R_Infected_vs_Control	MD10G1052800	Chr10	7012367	7013853	-	4.67136	4.24167	5.58232	2.47513e-07	1.96408e-06	6.36555	2-oxoglutarate (2OG) and Fe(II)-dependent oxygenase superfamily protein	Belongs to the iron ascorbate-dependent oxidoreductase family	0	0	NA	2OG-FeII_Oxy,DIOX_N	Yes
Within-group	Bulk-R_Infected_vs_Control	MD10G1286300	Chr10	37571420	37572034	-	4.66946	4.11882	7.62756	2.35014e-11	6.99463e-10	15.4421	ethylene responsive element binding factor 2	Pathogenesis-related genes transcriptional activator PTI5-like	0	0	ko04626,map04626	AP2	Yes
Within-group	Bulk-R_Infected_vs_Control	MD12G1150100	Chr12	23034943	23042247	+	4.66833	6.02075	10.0799	1.91333e-16	4.07237e-14	26.8402	cysteine-rich RLK (RECEPTOR-like protein kinase) 8	Retrotransposon gag protein	0	0	NA	Retrotran_gag_2,Retrotran_gag_3,Retrotrans_gag,gag_pre-integrs	Yes
Within-group	Bulk-R_Infected_vs_Control	MD08G1037300	Chr08	2743216	2745494	-	4.66676	0.862401	3.68135	0.000394811	0.00121823	-0.320793	inositol polyphosphate 5-phosphatase 11	Type I inositol 1,4,5-trisphosphate 5-phosphatase 11-like	0	0	ko00562,ko01100,ko04070,map00562,map01100,map04070	Exo_endo_phos	No
Within-group	Bulk-R_Infected_vs_Control	MD09G1261500	Chr09	33462874	33463101	-	4.66139	-1.01796	5.00241	2.77697e-06	1.58841e-05	4.43184	Protein of unknown function	NA	0	0	NA	NA	Yes
Within-group	Bulk-R_Infected_vs_Control	MD13G1213900	Chr13	20153481	20155612	+	4.66132	-0.0126904	7.07179	3.15944e-10	6.46925e-09	13.0498	myb domain protein 15	Myb-related protein Myb4-like	0	0	NA	Myb_DNA-binding	Yes
Within-group	Bulk-R_Infected_vs_Control	MD13G1038700	Chr13	2624195	2626163	-	4.66116	-1.52549	4.9248	3.8005e-06	2.08963e-05	4.15591	Core-2/I-branching beta-1	Core-2/I-Branching enzyme	0	0	NA	Branch	No
Within-group	Bulk-R_Infected_vs_Control	MD15G1117400	Chr15	8376957	8379861	-	4.66048	1.41537	6.29364	1.09865e-08	1.32873e-07	9.62319	cysteine-rich RLK (RECEPTOR-like protein kinase) 29	Cysteine-rich receptor-like protein kinase	0	0	NA	Pkinase,Pkinase_Tyr,Stress-antifung	Yes
Within-group	Bulk-R_Infected_vs_Control	MD00G1166500	Chr00	38161476	38163482	+	4.66016	0.578875	7.48914	4.50647e-11	1.22825e-09	14.9275	CRINKLY4 related 3	Serine threonine-protein kinase-like protein	0	0	ko04010,ko04064,ko04620,ko04624,ko04722,ko05133,ko05140,ko05142,ko05145,ko05152,ko05162,ko05169,map04010,map04064,map04620,map04624,map04722,map05133,map05140,map05142,map05145,map05152,map05162,map05169	Pkinase,Pkinase_Tyr,RCC1_2	Yes
Within-group	Bulk-R_Infected_vs_Control	MD16G1147100	Chr16	11494385	11496740	+	4.65779	0.0726392	2.66912	0.00901905	0.0185968	-3.10519	laccase 7	Belongs to the multicopper oxidase family	0	0	NA	Cu-oxidase,Cu-oxidase_2,Cu-oxidase_3	No
Within-group	Bulk-R_Infected_vs_Control	MD12G1207100	Chr12	28720137	28720763	+	4.65536	-0.74123	5.49409	3.60361e-07	2.71441e-06	6.35241	Plant Tudor-like protein	Agenet domain	0	0	NA	Agenet	Yes
Within-group	Bulk-R_Infected_vs_Control	MD09G1030200	Chr09	1854514	1855354	+	4.65271	-1.19681	4.62946	1.2253e-05	5.78533e-05	3.0462	Pectin lyase-like superfamily protein	Polygalacturonase	0	0	ko00040,ko01100,map00040,map01100	Glyco_hydro_28	Yes
Within-group	Bulk-R_Infected_vs_Control	MD15G1071700	Chr15	4930722	4932178	-	4.65266	-1.12529	6.90555	6.8107e-10	1.24768e-08	12.285	Glycosyl hydrolase family 35 protein	NA	0	0	NA	NA	Yes
Within-group	Bulk-R_Infected_vs_Control	MD02G1034500	Chr02	2640563	2644552	+	4.65077	1.34831	5.3681	6.13282e-07	4.29457e-06	5.79327	Protein kinase superfamily protein	ethanolamine kinase	0	0	ko00564,ko01100,map00564,map01100	Choline_kinase	Yes
Within-group	Bulk-R_Infected_vs_Control	MD04G1172300	Chr04	26385664	26386404	-	4.64911	0.346102	6.44713	5.51124e-09	7.34348e-08	10.3181	NA	RING-type E3 ubiquitin transferase	0	0	NA	Arm,U-box	No
Within-group	Bulk-R_Infected_vs_Control	MD15G1267100	Chr15	22967675	22969573	-	4.64551	6.71447	8.63479	1.9535e-13	1.19924e-11	19.8956	NA	NA	0	0	NA	NA	Yes
Within-group	Bulk-R_Infected_vs_Control	MD10G1311000	Chr10	39589947	39593656	-	4.64497	-1.36655	4.04051	0.000111984	0.00040409	0.985385	terpene synthase 02	(E,E)-alpha-farnesene	0	0	ko00909,ko01110,map00909,map01110	Terpene_synth,Terpene_synth_C	No
Within-group	Bulk-R_Infected_vs_Control	MD06G1138500	Chr06	28356819	28357724	+	4.6384	3.91387	8.67796	1.58879e-13	1.0091e-11	20.3678	WRKY DNA-binding protein 75	WRKY Transcription Factor	0	0	NA	WRKY	Yes
Within-group	Bulk-R_Infected_vs_Control	MD16G1148300	Chr16	11579620	11582011	+	4.63698	1.39597	3.47903	0.000777066	0.00220601	-0.980211	myb domain protein 108	Transcription factor	0	0	NA	Myb_DNA-binding	Yes
Within-group	Bulk-R_Infected_vs_Control	MD08G1080000	Chr08	6658815	6659345	+	4.63501	2.5527	5.14479	1.55178e-06	9.5389e-06	4.79953	Uncharacterised conserved protein UCP031279	Uncharacterised conserved protein UCP031279 (InterPro IPR016972)	0	0	NA	NA	Yes
Within-group	Bulk-R_Infected_vs_Control	MD14G1206500	Chr14	29366077	29370435	-	4.63147	-1.19023	4.16333	7.1615e-05	0.000273508	1.40557	Flavin-binding monooxygenase family protein	flavin-containing monooxygenase	0	0	NA	FMO-like,K_oxygenase	No
Within-group	Bulk-R_Infected_vs_Control	MD10G1306700	Chr10	39237942	39241072	+	4.63039	-1.75627	10.0844	1.87254e-16	4.01194e-14	26.4311	S-locus lectin protein kinase family protein	G-type lectin S-receptor-like serine threonine-protein kinase	0	0	ko04010,ko04064,ko04620,ko04621,ko04624,ko04722,ko05133,ko05140,ko05142,ko05145,ko05152,ko05162,ko05164,map04010,map04064,map04620,map04621,map04624,map04722,map05133,map05140,map05142,map05145,map05152,map05162,map05164	B_lectin,DUF3403,PAN_2,Pkinase,Pkinase_Tyr,S_locus_glycop	Yes
Within-group	Bulk-R_Infected_vs_Control	MD06G1003700	Chr06	430827	433341	+	4.62538	3.50268	3.62471	0.000478386	0.0014393	-0.743168	NAD(P)-binding Rossmann-fold superfamily protein	Cinnamoyl-CoA reductase	0	0	NA	Epimerase	Yes
Within-group	Bulk-R_Infected_vs_Control	MD14G1140700	Chr14	23076532	23078633	-	4.62437	-1.72436	5.25992	9.63769e-07	6.31555e-06	5.43883	2-oxoglutarate (2OG) and Fe(II)-dependent oxygenase superfamily protein	Belongs to the iron ascorbate-dependent oxidoreductase family	0	0	NA	2OG-FeII_Oxy,DIOX_N	No
Within-group	Bulk-R_Infected_vs_Control	MD05G1328200	Chr05	45366110	45372423	+	4.62314	2.37171	6.83197	9.55348e-10	1.64401e-08	11.9635	S-locus lectin protein kinase family protein	serine threonine-protein kinase	0	0	NA	B_lectin,DUF3403,PAN_2,Pkinase,Pkinase_Tyr,S_locus_glycop	Yes
Within-group	Bulk-R_Infected_vs_Control	MD00G1190500	Chr00	45754845	45756231	-	4.62237	-2.15855	2.93612	0.00421686	0.00960405	-2.25603	Haloacid dehalogenase-like hydrolase (HAD) superfamily protein	Haloacid dehalogenase-like hydrolase domain-containing protein Sgpp	0	0	NA	HAD_2	No
Within-group	Bulk-R_Infected_vs_Control	MD13G1284800	Chr13	43047191	43049781	-	4.61104	7.04939	8.1489	1.98795e-12	8.34166e-11	17.5935	cytochrome P450	Cytochrome p450	0	0	NA	p450	Yes
Within-group	Bulk-R_Infected_vs_Control	MD03G1020000	Chr03	1555813	1556622	+	4.60379	-1.59698	4.11021	8.69755e-05	0.000324324	1.22433	receptor-like protein kinase 1	G-type lectin S-receptor-like serine threonine-protein kinase	0	0	NA	B_lectin,PAN_2,Pkinase,Pkinase_Tyr,S_locus_glycop	Yes
Within-group	Bulk-R_Infected_vs_Control	MD02G1150700	Chr02	12402868	12403895	-	4.5993	0.00973489	4.54074	1.72857e-05	7.83334e-05	2.66016	Protein of unknown function	NA	0	0	NA	NA	Yes
Within-group	Bulk-R_Infected_vs_Control	MD14G1149200	Chr14	24214058	24217067	+	4.5927	2.47597	5.21133	1.17908e-06	7.51047e-06	5.07932	phosphate transporter 3	Belongs to the mitochondrial carrier (TC 2.A.29) family	0	0	NA	Mito_carr	Yes
Within-group	Bulk-R_Infected_vs_Control	MD14G1187900	Chr14	27990723	27992156	+	4.59053	-1.83115	5.89507	6.40686e-08	6.09811e-07	7.98041	F-box family protein	NA	0	0	NA	F-box,F-box-like	Yes
Within-group	Bulk-R_Infected_vs_Control	MD05G1211000	Chr05	34224366	34225801	+	4.58845	5.99947	8.17427	1.76177e-12	7.67119e-11	17.7336	glutathione S-transferase TAU 19	Glutathione S-transferase	0	0	ko00480,ko00980,ko00982,ko00983,ko01524,ko05200,ko05204,ko05225,ko05418,map00480,map00980,map00982,map00983,map01524,map05200,map05204,map05225,map05418	GST_C,GST_C_2,GST_N,GST_N_3	Yes
Within-group	Bulk-R_Infected_vs_Control	MD05G1237600	Chr05	36868367	36869139	+	4.58152	-1.57162	5.88551	6.67996e-08	6.33568e-07	7.94455	NA	NA	0	0	NA	NA	Yes
Within-group	Bulk-R_Infected_vs_Control	MD15G1402400	Chr15	50324315	50326337	-	4.58096	1.97443	4.04947	0.000108419	0.000393093	0.825504	12-oxophytodienoate reductase 2	12-oxophytodienoate reductase	0	0	ko00592,ko01100,ko01110,map00592,map01100,map01110	Oxidored_FMN	Yes
Within-group	Bulk-R_Infected_vs_Control	MD11G1093500	Chr11	7787536	7789652	-	4.57809	3.48559	3.95844	0.000150293	0.000522993	0.316601	NAD(P)-binding Rossmann-fold superfamily protein	Tropinone reductase homolog At1g07440-like	0	0	ko00960,ko01100,ko01110,map00960,map01100,map01110	adh_short,adh_short_C2	Yes
Within-group	Bulk-R_Infected_vs_Control	MD11G1140500	Chr11	13051711	13053585	-	4.57683	-1.9986	6.35744	8.25302e-09	1.04338e-07	9.91262	alpha carbonic anhydrase 7	Bifunctional monodehydroascorbate reductase and carbonic anhydrase nectarin-3-like	0	0	ko00910,map00910	Carb_anhydrase	Yes
Within-group	Bulk-R_Infected_vs_Control	MD09G1142000	Chr09	11092860	11094776	+	4.57235	-0.130702	3.78232	0.000279076	0.000900331	0.0805763	UDP-glucosyl transferase 71B6	Belongs to the UDP-glycosyltransferase family	0	0	NA	UDPGT	No
Within-group	Bulk-R_Infected_vs_Control	MD09G1141500	Chr09	11062200	11063618	-	4.56953	5.4038	8.35311	7.5101e-13	3.75397e-11	18.6936	UDP-Glycosyltransferase superfamily protein	Belongs to the UDP-glycosyltransferase family	0	0	NA	UDPGT	Yes
Within-group	Bulk-R_Infected_vs_Control	MD01G1123300	Chr01	23652004	23652594	+	4.5588	0.598477	5.8938	6.44237e-08	6.1247e-07	7.96019	C2H2-type zinc finger family protein	ZINC FINGER protein	0	0	NA	zf-C2H2_6	Yes
Within-group	Bulk-R_Infected_vs_Control	MD13G1137800	Chr13	10620986	10621538	+	4.55797	3.77149	5.47409	3.9224e-07	2.92296e-06	5.99242	NA	Thioesterase superfamily	0	0	NA	4HBT	Yes
Within-group	Bulk-R_Infected_vs_Control	MD07G1178400	Chr07	25815852	25819479	+	4.55769	5.22857	7.92888	5.65492e-12	2.06955e-10	16.7232	IQ-domain 2	IQ-DOMAIN 1-like	0	0	NA	DUF4005,IQ	No
Within-group	Bulk-R_Infected_vs_Control	MD08G1227200	Chr08	29356105	29358646	+	4.54574	-1.22667	7.11648	2.56787e-10	5.45499e-09	13.2065	WRKY DNA-binding protein 9	WRKY transcription factor	0	0	NA	WRKY	Yes
Within-group	Bulk-R_Infected_vs_Control	MD15G1401800	Chr15	50262289	50272691	-	4.54321	-0.219081	6.03575	3.45519e-08	3.60239e-07	8.57177	12-oxophytodienoate reductase 2	12-oxophytodienoate reductase	0	0	ko00592,ko01100,ko01110,map00592,map01100,map01110	Oxidored_FMN	Yes
Within-group	Bulk-R_Infected_vs_Control	MD03G1242400	Chr03	32711680	32713002	-	4.53689	4.18974	6.13483	2.22941e-08	2.47091e-07	8.7251	D-mannose binding lectin protein with Apple-like carbohydrate-binding domain	Epidermis-specific secreted glycoprotein	0	0	NA	B_lectin,PAN_2,S_locus_glycop	No
Within-group	Bulk-R_Infected_vs_Control	MD06G1198600	Chr06	33258211	33261678	+	4.53206	2.85447	6.11105	2.47727e-08	2.69938e-07	8.77402	Leucine-rich repeat protein kinase family protein	Belongs to the protein kinase superfamily. Ser Thr protein kinase family	0	0	NA	LRRNT_2,LRR_1,LRR_6,LRR_8,Pkinase	Yes
Within-group	Bulk-R_Infected_vs_Control	MD12G1218000	Chr12	29558554	29562100	-	4.52488	-1.17514	4.38924	3.08412e-05	0.000130292	2.18746	lipoxygenase 1	Plant lipoxygenase may be involved in a number of diverse aspects of plant physiology including growth and development, pest resistance, and senescence or responses to wounding	0	0	ko00591,map00591	Lipoxygenase,PLAT	Yes
Within-group	Bulk-R_Infected_vs_Control	MD14G1119600	Chr14	19372007	19373641	+	4.51415	-1.47105	5.49464	3.59513e-07	2.70866e-06	6.36268	Galactose mutarotase-like superfamily protein	Belongs to the glucose-6-phosphate 1-epimerase family	0	0	ko00010,ko01100,ko01110,ko01120,ko01130,map00010,map01100,map01110,map01120,map01130	Aldose_epim	Yes
Within-group	Bulk-R_Infected_vs_Control	MD05G1359500	Chr05	47425501	47428602	-	4.51236	5.26617	10.1915	1.12174e-16	2.72862e-14	27.4088	Auxin-responsive family protein	Auxin-induced in root cultures protein	0	0	NA	Cytochrom_B561,DUF568	Yes
Within-group	Bulk-R_Infected_vs_Control	MD17G1140400	Chr17	12621305	12624146	+	4.5092	0.726042	6.85056	8.77167e-10	1.53561e-08	12.0774	Leucine-rich repeat receptor-like protein kinase family protein	LRR receptor-like serine threonine-protein kinase	0	0	NA	LRRNT_2,LRR_1,LRR_8,Pkinase,Pkinase_Tyr	Yes
Within-group	Bulk-R_Infected_vs_Control	MD05G1306900	Chr05	43876234	43876827	-	4.50781	2.88792	4.92191	3.84493e-06	2.10976e-05	3.89466	ethylene responsive element binding factor 1	Pathogenesis-related genes transcriptional activator PTI5-like	0	0	ko04626,map04626	AP2	Yes
Within-group	Bulk-R_Infected_vs_Control	MD16G1068700	Chr16	4856564	4857998	+	4.50666	-0.291655	6.33214	9.24539e-09	1.14861e-07	9.82596	fucosyltransferase 1	Galactoside 2-alpha-L-fucosyltransferase-like	0	0	NA	XG_FTase	Yes
Within-group	Bulk-R_Infected_vs_Control	MD02G1120200	Chr02	9819345	9821310	+	4.50389	3.28334	5.54258	2.9324e-07	2.28325e-06	6.24207	basic chitinase	Endochitinase-like	0	0	ko00520,ko01100,ko04016,map00520,map01100,map04016	Chitin_bind_1,Glyco_hydro_19	No
Within-group	Bulk-R_Infected_vs_Control	MD07G1004600	Chr07	492749	497683	-	4.50339	2.9945	6.27669	1.18518e-08	1.41959e-07	9.48329	lipoxygenase 3	Plant lipoxygenase may be involved in a number of diverse aspects of plant physiology including growth and development, pest resistance, and senescence or responses to wounding	0	0	ko00591,ko00592,ko01100,ko01110,map00591,map00592,map01100,map01110	Lipoxygenase,PLAT	No
Within-group	Bulk-R_Infected_vs_Control	MD05G1139200	Chr05	26972229	26976699	-	4.49485	-0.204938	6.23067	1.45561e-08	1.70623e-07	9.39342	Leucine-rich receptor-like protein kinase family protein	Receptor protein kinase	0	0	NA	LRRNT_2,LRR_1,LRR_6,LRR_8,Pkinase,Pkinase_Tyr	No
Within-group	Bulk-R_Infected_vs_Control	MD11G1039300	Chr11	3369648	3370395	+	-3.34552	-0.88712	-3.68273	0.000392948	0.00121339	-0.263365	Heavy metal transport/detoxification superfamily protein	NA	1	0	NA	NA	No
Within-group	Bulk-R_Infected_vs_Control	MD01G1055200	Chr01	15978768	15981585	+	4.49161	-0.820361	3.23791	0.00168572	0.00432486	-1.51884	downstream target of AGL15 2	O-glucosyltransferase rumi homolog	0	0	ko00514,map00514	Glyco_transf_90	Yes
Within-group	Bulk-R_Infected_vs_Control	MD11G1023900	Chr11	2054793	2059025	-	4.48784	-0.625934	2.67153	0.00895935	0.0184973	-3.02865	beta glucosidase 13	Belongs to the glycosyl hydrolase 1 family	0	0	ko00460,ko00500,ko00940,ko01100,ko01110,map00460,map00500,map00940,map01100,map01110	Glyco_hydro_1	No
Within-group	Bulk-R_Infected_vs_Control	MD15G1400600	Chr15	50151713	50154622	-	4.48768	-1.85239	7.0322	3.7952e-10	7.56981e-09	12.7985	12-oxophytodienoate reductase 2	12-oxophytodienoate reductase	0	0	ko00592,ko01100,ko01110,map00592,map01100,map01110	Oxidored_FMN	No
Within-group	Bulk-R_Infected_vs_Control	MD10G1266400	Chr10	35935449	35937762	-	4.48572	3.62847	6.25989	1.27758e-08	1.52069e-07	9.29372	WRKY DNA-binding protein 28	WRKY transcription factor	0	0	NA	WRKY	Yes
Within-group	Bulk-R_Infected_vs_Control	MD09G1135900	Chr09	10442257	10443923	-	4.48544	-0.65454	5.5822	2.47645e-07	1.96464e-06	6.70751	UDP-glucosyl transferase 85A2	UDP-Glycosyltransferase	0	0	NA	UDPGT	Yes
Within-group	Bulk-R_Infected_vs_Control	MD05G1198900	Chr05	32673890	32674324	-	4.48438	-1.5396	6.74584	1.41791e-09	2.30629e-08	11.58	Integrase-type DNA-binding superfamily protein	ethylene-responsive transcription factor	0	0	NA	AP2	Yes
Within-group	Bulk-R_Infected_vs_Control	MD05G1085800	Chr05	18064698	18066163	+	4.48294	2.23934	5.7665	1.12082e-07	9.86344e-07	7.36307	UDP-glucosyl transferase 73B3	Belongs to the UDP-glycosyltransferase family	0	0	ko00906,ko01100,ko01110,map00906,map01100,map01110	UDPGT	Yes
Within-group	Bulk-R_Infected_vs_Control	MD02G1291400	Chr02	34709309	34714920	-	4.47211	-1.47205	4.27555	4.72782e-05	0.000190005	1.80296	Eukaryotic aspartyl protease family protein	Belongs to the peptidase A1 family	0	0	NA	TAXi_C,TAXi_N	No
Within-group	Bulk-R_Infected_vs_Control	MD13G1160600	Chr13	12606736	12607417	-	4.47059	3.80632	5.33712	6.98332e-07	4.79466e-06	5.37341	MLP-like protein 423	NA	0	0	NA	NA	Yes
Within-group	Bulk-R_Infected_vs_Control	MD09G1259200	Chr09	33181852	33183164	-	4.45999	-0.0668866	6.37091	7.76832e-09	9.91403e-08	9.99183	NA	NA	0	0	NA	NA	Yes
Within-group	Bulk-R_Infected_vs_Control	MD14G1145500	Chr14	23835989	23838741	-	4.45431	7.47914	15.3676	6.42435e-27	2.07841e-22	50.7794	Protein of unknown function	Encoded by	0	0	NA	SURNod19	Yes
Within-group	Bulk-R_Infected_vs_Control	MD15G1086000	Chr15	5963082	5965502	-	4.45412	-1.89927	3.73611	0.000327328	0.00103466	0.0405426	phospholipase A 2A	Lipolytic acyl hydrolase (LAH)	0	0	NA	Patatin	No
Within-group	Bulk-R_Infected_vs_Control	MD11G1093100	Chr11	7722006	7724115	-	4.45324	2.27305	4.48008	2.1824e-05	9.60391e-05	2.3129	highly ABA-induced PP2C gene 3	phosphatase 2C	0	0	ko04016,ko04075,ko04931,map04016,map04075,map04931	PP2C	Yes
Within-group	Bulk-R_Infected_vs_Control	MD10G1299500	Chr10	38693916	38697459	-	4.45194	-1.39651	3.57332	0.000568499	0.00167842	-0.496987	Protein of unknown function	At4g04980-like	0	0	ko04062,ko04144,ko04520,ko04530,ko04666,ko04810,ko05100,ko05130,ko05131,ko05132,ko05231,map04062,map04144,map04520,map04530,map04666,map04810,map05100,map05130,map05131,map05132,map05231	NA	Yes
Within-group	Bulk-R_Infected_vs_Control	MD10G1194100	Chr10	29020103	29022348	+	4.4514	4.9397	7.15714	2.12595e-10	4.67247e-09	13.1514	Arabidopsis thaliana gibberellin 2-oxidase 1	Belongs to the iron ascorbate-dependent oxidoreductase family	0	0	ko00904,ko01110,map00904,map01110	2OG-FeII_Oxy,DIOX_N	Yes
Within-group	Bulk-R_Infected_vs_Control	MD03G1051100	Chr03	4095942	4099794	+	4.4508	5.05291	6.46969	4.97763e-09	6.74356e-08	10.0779	cinnamate-4-hydroxylase	Belongs to the cytochrome P450 family	0	0	ko00130,ko00360,ko00940,ko00941,ko00945,ko01100,ko01110,ko01220,map00130,map00360,map00940,map00941,map00945,map01100,map01110,map01220	p450	Yes
Within-group	Bulk-R_Infected_vs_Control	MD11G1186400	Chr11	25377767	25378414	-	4.4432	-1.04809	6.07659	2.88529e-08	3.0763e-07	8.74357	Protein of unknown function	Domain of unknown function (DUF4228)	0	0	NA	DUF4228	No
Within-group	Bulk-R_Infected_vs_Control	MD05G1138900	Chr05	26950939	26954248	-	4.44275	0.98676	7.02499	3.92397e-10	7.78345e-09	12.8509	Leucine-rich receptor-like protein kinase family protein	Receptor protein kinase	0	0	NA	LRRNT_2,LRR_1,LRR_6,LRR_8,Pkinase,Pkinase_Tyr	No
Within-group	Bulk-R_Infected_vs_Control	MD17G1197100	Chr17	23622309	23623676	+	4.43974	-1.44844	5.28787	8.57885e-07	5.72017e-06	5.5418	HXXXD-type acyl-transferase family protein	acetyltransferase At3g50280-like	0	0	NA	Transferase	Yes
Within-group	Bulk-R_Infected_vs_Control	MD00G1009200	Chr00	1153322	1153609	-	4.43812	0.216341	4.82605	5.64485e-06	2.94837e-05	3.71832	Protein of unknown function	NA	0	0	NA	NA	No
Within-group	Bulk-R_Infected_vs_Control	MD00G1221100	Chr00	52347255	52347542	-	4.43812	0.216341	4.82605	5.64485e-06	2.94837e-05	3.71832	Protein of unknown function	NA	0	0	NA	NA	No
Within-group	Bulk-R_Infected_vs_Control	MD15G1367800	Chr15	44716223	44719427	-	4.4344	-1.87039	6.44134	5.65723e-09	7.5e-08	10.2575	Leucine-rich repeat receptor-like protein kinase family protein	LRR receptor-like serine threonine-protein kinase	0	0	NA	LRRNT_2,LRR_1,LRR_8,Pkinase,Pkinase_Tyr	Yes
Within-group	Bulk-R_Infected_vs_Control	MD00G1018700	Chr00	3198553	3199867	-	4.43438	5.3095	7.15908	2.10691e-10	4.64007e-09	13.1452	hemoglobin 1	Belongs to the globin family	0	0	NA	Globin	Yes
Within-group	Bulk-R_Infected_vs_Control	MD02G1047600	Chr02	3775358	3778513	-	4.43304	0.3952	6.75033	1.38906e-09	2.2662e-08	11.6371	lectin protein kinase family protein	G-type lectin S-receptor-like serine threonine-protein kinase	0	0	NA	B_lectin,DUF3403,PAN_2,Pkinase,Pkinase_Tyr,S_locus_glycop	Yes
Within-group	Bulk-R_Infected_vs_Control	MD06G1066600	Chr06	14217015	14222078	-	4.42687	0.588332	4.09901	9.05972e-05	0.000336124	1.11393	Glycosyl hydrolases family 32 protein	Belongs to the glycosyl hydrolase 32 family	0	0	ko00052,ko00500,ko01100,map00052,map00500,map01100	DUF3357,Glyco_hydro_32C,Glyco_hydro_32N	No
Within-group	Bulk-R_Infected_vs_Control	MD09G1145300	Chr09	11298929	11301415	+	4.42302	-1.36614	6.22987	1.46079e-08	1.70949e-07	9.37694	wall associated kinase-like 2	wall-associated receptor kinase-like	0	0	ko04010,ko04064,ko04620,ko04621,ko04624,ko04722,ko05133,ko05140,ko05142,ko05145,ko05152,ko05162,ko05164,map04010,map04064,map04620,map04621,map04624,map04722,map05133,map05140,map05142,map05145,map05152,map05162,map05164	EGF_CA,GUB_WAK_bind,Pkinase,Pkinase_Tyr,WAK	Yes
Within-group	Bulk-R_Infected_vs_Control	MD05G1129500	Chr05	25339184	25342111	-	4.42215	0.0343546	4.62803	1.23216e-05	5.80921e-05	2.99479	Transmembrane amino acid transporter family protein	Lysine histidine transporter-like	0	0	NA	Aa_trans	No
Within-group	Bulk-R_Infected_vs_Control	MD16G1170100	Chr16	14147589	14148401	-	4.41904	0.0346999	6.37405	7.65958e-09	9.79071e-08	10.0055	Protein of unknown function	f-box protein	0	0	NA	F-box-like	Yes
Within-group	Bulk-R_Infected_vs_Control	MD13G1160800	Chr13	12624052	12624741	+	4.41886	4.41239	6.57296	3.11812e-09	4.53789e-08	10.5375	NA	Major allergen Pru	0	0	NA	Bet_v_1	Yes
Within-group	Bulk-R_Infected_vs_Control	MD11G1173700	Chr11	20216333	20219360	+	4.41789	-1.05606	4.83264	5.49855e-06	2.88453e-05	3.79448	NA	NA	0	0	NA	NA	No
Within-group	Bulk-R_Infected_vs_Control	MD07G1281500	Chr07	34475512	34476096	-	4.41701	-2.05705	6.10907	2.49906e-08	2.71854e-07	8.85962	Late embryogenesis abundant (LEA) hydroxyproline-rich glycoprotein family	Late embryogenesis abundant protein	0	0	NA	LEA_2	Yes
Within-group	Bulk-R_Infected_vs_Control	MD16G1084900	Chr16	5944372	5944626	-	4.41559	-1.65763	7.66783	1.94377e-11	5.92693e-10	15.6089	Protein of unknown function	protection from non-homologous end joining at telomere	0	0	NA	NA	Yes
Within-group	Bulk-R_Infected_vs_Control	MD13G1241200	Chr13	25052470	25055454	+	4.41553	-0.937016	4.83876	5.3659e-06	2.82723e-05	3.81584	plant intracellular ras group-related LRR 6	Plant intracellular ras-group-related LRR protein	0	0	NA	LRR_8	Yes
Within-group	Bulk-R_Infected_vs_Control	MD06G1184200	Chr06	32241189	32243656	+	4.41415	0.603781	4.48278	2.15996e-05	9.52048e-05	2.42544	structural molecules	The coatomer is a cytosolic protein complex that binds to dilysine motifs and reversibly associates with Golgi non- clathrin-coated vesicles, which further mediate biosynthetic protein transport from the ER, via the Golgi up to the trans Golgi network. Coatomer complex is required for budding from Golgi membranes, and is essential for the retrograde Golgi-to-ER transport of dilysine-tagged protei…	0	0	NA	Coatomer_WDAD,WD40	Yes
Within-group	Bulk-R_Infected_vs_Control	MD05G1313700	Chr05	44418658	44421422	+	4.40971	2.29431	5.4172	4.98816e-07	3.58536e-06	5.92672	heat shock transcription factor B2A	Heat Stress Transcription Factor	0	0	NA	HSF_DNA-bind	Yes
Within-group	Bulk-R_Infected_vs_Control	MD00G1148200	Chr00	32488852	32491834	-	4.40622	2.27289	5.13753	1.59883e-06	9.78723e-06	4.73639	alternative oxidase 1A	Belongs to the alternative oxidase family	0	0	NA	AOX	Yes
Within-group	Bulk-R_Infected_vs_Control	MD05G1252900	Chr05	38424263	38424991	-	4.40021	3.07403	5.46729	4.037e-07	2.99004e-06	6.04718	Protein of unknown function	Cysteine-rich TM module stress tolerance	0	0	NA	NA	Yes
Within-group	Bulk-R_Infected_vs_Control	MD13G1098500	Chr13	6981515	6982225	+	4.39922	-1.83561	4.69087	9.63613e-06	4.69854e-05	3.29003	sulfur E2	SufE-like protein	0	0	NA	SufE	Yes
Within-group	Bulk-R_Infected_vs_Control	MD13G1002900	Chr13	176696	177903	+	4.38963	0.1781	4.51972	1.87437e-05	8.40816e-05	2.60281	GRAM domain-containing protein / ABA-responsive protein-related	GEM-like protein	0	0	NA	GRAM	No
Within-group	Bulk-R_Infected_vs_Control	MD00G1187100	Chr00	44345157	44346306	-	4.37666	0.66228	2.80923	0.00608895	0.0132199	-2.76317	Oxidoreductase	2-methylene-furan-3-one reductase-like	0	0	NA	ADH_N,ADH_zinc_N,ADH_zinc_N_2	Yes
Within-group	Bulk-R_Infected_vs_Control	MD07G1282900	Chr07	34603494	34604436	-	4.37544	-2.16176	4.81393	5.92401e-06	3.07334e-05	3.74662	chitinase A	Belongs to the glycosyl hydrolase 18 family	0	0	ko00520,ko01100,map00520,map01100	Glyco_hydro_18	No
Within-group	Bulk-R_Infected_vs_Control	MD03G1019900	Chr03	1554957	1555810	+	4.37331	-2.01922	4.0159	0.000122358	0.00043702	0.931674	receptor-like protein kinase 1	G-type lectin S-receptor-like serine threonine-protein kinase	0	0	NA	B_lectin,PAN_2,Pkinase,Pkinase_Tyr,S_locus_glycop	Yes
Within-group	Bulk-R_Infected_vs_Control	MD02G1084600	Chr02	6661830	6664308	+	4.37228	3.01722	5.14053	1.57923e-06	9.68556e-06	4.71382	homology to ABI2	phosphatase 2C	0	0	ko04016,ko04075,ko04931,map04016,map04075,map04931	PP2C	Yes
Within-group	Bulk-R_Infected_vs_Control	MD10G1325200	Chr10	40581717	40582169	-	4.37194	-2.29092	4.06543	0.000102337	0.00037347	1.09392	Stigma-specific Stig1 family protein	Stigma-specific protein, Stig1	0	0	NA	Stig1	Yes
Within-group	Bulk-R_Infected_vs_Control	MD13G1005200	Chr13	331104	333902	+	4.36905	-0.863542	7.42701	6.03132e-11	1.56979e-09	14.5957	Protein of unknown function	NA	0	0	NA	NA	Yes
Within-group	Bulk-R_Infected_vs_Control	MD06G1050100	Chr06	6831015	6832673	-	4.36735	-0.51412	3.98454	0.000136919	0.000481794	0.768868	alpha/beta-Hydrolases superfamily protein	Phospholipase A1-Ibeta2	0	0	NA	Lipase_3	No
Within-group	Bulk-R_Infected_vs_Control	MD10G1306800	Chr10	39241434	39244765	+	4.35885	0.382943	4.71117	8.89702e-06	4.38307e-05	3.28599	S-locus lectin protein kinase family protein	G-type lectin S-receptor-like serine threonine-protein kinase	0	0	ko04010,ko04064,ko04620,ko04621,ko04624,ko04722,ko05133,ko05140,ko05142,ko05145,ko05152,ko05162,ko05164,map04010,map04064,map04620,map04621,map04624,map04722,map05133,map05140,map05142,map05145,map05152,map05162,map05164	B_lectin,DUF3403,PAN_2,Pkinase,Pkinase_Tyr,S_locus_glycop	Yes
Within-group	Bulk-R_Infected_vs_Control	MD06G1032200	Chr06	3863091	3865867	-	4.35866	3.89386	7.86124	7.79172e-12	2.71343e-10	16.5498	plant intracellular ras group-related LRR 4	Plant intracellular Ras-group-related LRR protein 5-like	0	0	NA	LRR_1,LRR_8	Yes
Within-group	Bulk-R_Infected_vs_Control	MD10G1328100	Chr10	40754906	40756831	+	4.35775	8.66691	10.0994	1.74268e-16	3.75862e-14	26.8524	ethylene-forming enzyme	Belongs to the iron ascorbate-dependent oxidoreductase family	0	0	ko00270,ko01100,ko01110,map00270,map01100,map01110	2OG-FeII_Oxy,DIOX_N	Yes
Within-group	Bulk-R_Infected_vs_Control	MD15G1170100	Chr15	13113719	13115057	-	4.35706	4.56123	6.07704	2.87949e-08	3.07246e-07	8.33185	blue-copper-binding protein	Plastocyanin-like domain	0	0	NA	Cu_bind_like	Yes
Within-group	Bulk-R_Infected_vs_Control	MD04G1172400	Chr04	26386553	26387764	+	4.35221	2.03203	5.59	2.39526e-07	1.90725e-06	6.62757	ARM repeat superfamily protein	RING-type E3 ubiquitin transferase	0	0	NA	Arm,U-box	No
Within-group	Bulk-R_Infected_vs_Control	MD12G1075400	Chr12	9163197	9167383	+	4.34523	-1.53589	5.98013	4.41364e-08	4.45801e-07	8.33246	Glycosyltransferase family 61 protein	Protein of unknown function (DUF563)	0	0	ko00514,map00514	DUF563	Yes
Within-group	Bulk-R_Infected_vs_Control	MD15G1384100	Chr15	47328301	47329266	-	4.34439	4.51	9.5607	2.30237e-15	3.25268e-13	24.4886	Predicted AT-hook DNA-binding family protein	Transcription factor that specifically binds AT-rich DNA sequences related to the nuclear matrix attachment regions (MARs)	0	0	NA	DUF296	Yes
Within-group	Bulk-R_Infected_vs_Control	MD05G1295700	Chr05	43023949	43025466	-	4.34204	3.81038	7.22244	1.56884e-10	3.59456e-09	13.6158	WRKY DNA-binding protein 65	WRKY transcription factor	0	0	NA	WRKY	Yes
Within-group	Bulk-R_Infected_vs_Control	MD13G1115700	Chr13	8387769	8389839	+	4.33438	3.84055	5.97836	4.44805e-08	4.48576e-07	8.05732	cytochrome P450	Belongs to the cytochrome P450 family	0	0	NA	p450	Yes
Within-group	Bulk-R_Infected_vs_Control	MD05G1046000	Chr05	7844238	7846093	+	4.33239	7.53096	8.9333	4.67311e-14	3.7055e-12	21.292	2-oxoglutarate (2OG) and Fe(II)-dependent oxygenase superfamily protein	Belongs to the iron ascorbate-dependent oxidoreductase family	0	0	NA	2OG-FeII_Oxy,DIOX_N	Yes
Within-group	Bulk-R_Infected_vs_Control	MD11G1262700	Chr11	37759734	37761101	+	4.32212	5.39823	8.71765	1.31372e-13	8.67377e-12	20.3751	Curculin-like (mannose-binding) lectin family protein	Epidermis-specific secreted glycoprotein EP1-like	0	0	NA	B_lectin,PAN_2	Yes
Within-group	Bulk-R_Infected_vs_Control	MD08G1218900	Chr08	28109645	28111087	-	4.3185	5.65864	8.56282	2.7568e-13	1.6128e-11	19.6195	UDP-glucosyl transferase 88A1	Anthocyanidin 5,3-O-glucosyltransferase-like	0	0	NA	UDPGT	Yes
Within-group	Bulk-R_Infected_vs_Control	MD14G1045500	Chr14	4311213	4315061	-	4.31572	1.04716	4.82037	5.77418e-06	3.0067e-05	3.64827	alpha/beta-Hydrolases superfamily protein	Carboxylesterase	0	0	NA	Abhydrolase_3	Yes
Within-group	Bulk-R_Infected_vs_Control	MD12G1197000	Chr12	27802757	27803149	+	4.31538	1.91287	5.04313	2.35315e-06	1.37392e-05	4.45618	Protein of unknown function	NA	0	0	NA	NA	Yes
Within-group	Bulk-R_Infected_vs_Control	MD15G1331300	Chr15	36715532	36718649	+	4.31205	1.05229	4.69169	9.60508e-06	4.68481e-05	3.17063	WRKY DNA-binding protein 51	WRKY transcription factor	0	0	NA	WRKY	Yes
Within-group	Bulk-R_Infected_vs_Control	MD12G1045200	Chr12	5051030	5052052	-	4.30608	-0.321815	6.49994	4.34137e-09	6.04615e-08	10.5464	Protein of unknown function	NA	0	0	NA	NA	Yes
Within-group	Bulk-R_Infected_vs_Control	MD14G1075400	Chr14	8532704	8534732	+	4.30551	3.97751	8.36493	7.09785e-13	3.58694e-11	18.8918	heat shock transcription factor B3	Heat Stress Transcription Factor	0	0	NA	HSF_DNA-bind	Yes
Within-group	Bulk-R_Infected_vs_Control	MD10G1214900	Chr10	31325389	31326154	+	4.3052	-2.19749	6.39209	7.06247e-09	9.12116e-08	10.0517	NA	NA	0	0	NA	NA	Yes
Within-group	Bulk-R_Infected_vs_Control	MD17G1197600	Chr17	23657340	23658401	-	4.3048	-2.25453	5.05555	2.23695e-06	1.31129e-05	4.65296	Galactose oxidase/kelch repeat superfamily protein	F-box kelch-repeat protein	0	0	NA	F-box,Kelch_1,Kelch_6	Yes
Within-group	Bulk-R_Infected_vs_Control	MD06G1160700	Chr06	30196820	30206164	+	4.30315	3.75208	4.92527	3.79335e-06	2.08711e-05	3.78824	peptide met sulfoxide reductase 4	Peptide methionine sulfoxide reductase-like	0	0	NA	PMSR	Yes
Within-group	Bulk-R_Infected_vs_Control	MD17G1164400	Chr17	16289064	16290315	-	4.30265	2.77583	5.80319	9.55982e-08	8.62703e-07	7.44609	TIFY domain/Divergent CCT motif family protein	TIFY 10B-like	0	0	ko04075,map04075	CCT_2,tify	Yes
Within-group	Bulk-R_Infected_vs_Control	MD16G1159900	Chr16	12957582	12958061	-	4.30165	-0.776391	5.71308	1.41193e-07	1.2062e-06	7.2395	MLP-like protein 423	Major allergen Pru	0	0	NA	Bet_v_1	No
Within-group	Bulk-R_Infected_vs_Control	MD08G1190900	Chr08	24176868	24181037	-	4.30149	-1.77998	5.71538	1.398e-07	1.19556e-06	7.25003	MATE efflux family protein	Belongs to the multi antimicrobial extrusion (MATE) (TC 2.A.66.1) family	0	0	NA	MatE	Yes
Within-group	Bulk-R_Infected_vs_Control	MD00G1162900	Chr00	36516515	36525000	+	4.29768	0.93151	7.02748	3.87899e-10	7.70993e-09	12.8614	abscisic aldehyde oxidase 3	Indole-3-acetaldehyde oxidase-like	0	0	ko00380,ko00906,ko01100,ko01110,map00380,map00906,map01100,map01110	Ald_Xan_dh_C,Ald_Xan_dh_C2,CO_deh_flav_C,FAD_binding_5,Fer2,Fer2_2	Yes
Within-group	Bulk-R_Infected_vs_Control	MD04G1223900	Chr04	30399951	30402958	-	4.29725	0.339836	5.87443	7.01095e-08	6.59931e-07	7.88558	calmodulin-like 11	EF-hand domain	0	0	ko04626,map04626	EF-hand_1	Yes
Within-group	Bulk-R_Infected_vs_Control	MD15G1302000	Chr15	29032121	29034138	+	4.29394	-1.76817	7.03887	3.67989e-10	7.3762e-09	12.8397	AP2/B3-like transcriptional factor family protein	B3 domain-containing	0	0	NA	B3	No
Within-group	Bulk-R_Infected_vs_Control	MD05G1338400	Chr05	45984155	45985496	-	4.29322	3.03683	3.68052	0.000395929	0.00122076	-0.52063	Protein of unknown function (DUF506)	PDDEXK-like family of unknown function	0	0	NA	PDDEXK_6	Yes
Within-group	Bulk-R_Infected_vs_Control	MD09G1011900	Chr09	776036	778254	-	4.29251	-1.34365	6.27195	1.21057e-08	1.44786e-07	9.5638	Galactose oxidase/kelch repeat superfamily protein	F-box kelch-repeat protein	0	0	NA	Kelch_1,Kelch_6	No
Within-group	Bulk-R_Infected_vs_Control	MD10G1234000	Chr10	33007120	33008126	-	4.2884	0.248935	6.61398	2.58773e-09	3.87226e-08	11.0399	NA	Cysteine-rich TM module stress tolerance	0	0	NA	NA	Yes
Within-group	Bulk-R_Infected_vs_Control	MD09G1073400	Chr09	5095873	5098550	+	4.28772	-0.766277	4.25258	5.14992e-05	0.000205033	1.68093	reversibly glycosylated polypeptide 2	Reversibly glycosylated polypeptide	0	0	ko00520,map00520	RGP	Yes
Within-group	Bulk-R_Infected_vs_Control	MD03G1282700	Chr03	36305324	36312277	-	4.28333	8.54148	10.8909	4.01217e-18	1.66412e-15	30.5996	glutathione S-transferase phi 8	Belongs to the GST superfamily	0	0	ko00480,ko00980,ko00982,ko00983,ko01524,ko05200,ko05204,ko05225,ko05418,map00480,map00980,map00982,map00983,map01524,map05200,map05204,map05225,map05418	GST_C,GST_N	Yes
Within-group	Bulk-R_Infected_vs_Control	MD15G1340300	Chr15	38504417	38510101	+	4.28245	0.282278	6.67914	1.92308e-09	3.00558e-08	11.326	sodium/calcium exchanger family protein / calcium-binding EF hand family protein	Belongs to the Ca(2 ) cation antiporter (CaCA) (TC 2.A.19) family	0	0	NA	EF-hand_7,EF-hand_8,Na_Ca_ex	Yes
Within-group	Bulk-R_Infected_vs_Control	MD05G1112200	Chr05	23066012	23069192	-	4.27651	2.41416	7.18449	1.87204e-10	4.18214e-09	13.5298	FAD/NAD(P)-binding oxidoreductase family protein	Squalene monooxygenase-like	0	0	ko00100,ko00909,ko01100,ko01110,ko01130,map00100,map00909,map01100,map01110,map01130	SE	Yes
Within-group	Bulk-R_Infected_vs_Control	MD03G1059400	Chr03	4783785	4784856	-	4.27376	0.0435101	7.58394	2.88602e-11	8.27002e-10	15.337	LOB domain-containing protein 13	LOB domain-containing protein	0	0	NA	LOB	Yes
Within-group	Bulk-R_Infected_vs_Control	MD03G1273400	Chr03	35676146	35678020	+	4.2717	-0.683652	6.25821	1.28726e-08	1.53108e-07	9.51003	NA	NA	0	0	NA	NA	Yes
Within-group	Bulk-R_Infected_vs_Control	MD05G1103100	Chr05	21369467	21381080	-	4.27071	2.58998	6.63048	2.40058e-09	3.62575e-08	11.0661	serine carboxypeptidase-like 1	Belongs to the peptidase S10 family	0	0	NA	Peptidase_S10	Yes
Within-group	Bulk-R_Infected_vs_Control	MD16G1104500	Chr16	7316699	7319388	+	4.27023	-1.30863	5.79737	9.80424e-08	8.80585e-07	7.5855	Copine (Calcium-dependent phospholipid-binding protein) family	E3 ubiquitin-protein ligase	0	0	NA	Copine,zf-C3HC4_3	Yes
Within-group	Bulk-R_Infected_vs_Control	MD11G1082100	Chr11	6990335	6993409	+	4.26917	1.15816	4.4786	2.19483e-05	9.65163e-05	2.36454	calmodulin-binding receptor-like cytoplasmic kinase 1	Belongs to the protein kinase superfamily	0	0	ko04010,ko04064,ko04620,ko04621,ko04624,ko04722,ko05133,ko05140,ko05142,ko05145,ko05152,ko05162,ko05164,map04010,map04064,map04620,map04621,map04624,map04722,map05133,map05140,map05142,map05145,map05152,map05162,map05164	Pkinase,Pkinase_Tyr	Yes
Within-group	Bulk-R_Infected_vs_Control	MD09G1277000	Chr09	35381876	35388878	-	4.26909	-0.454943	5.80278	9.57678e-08	8.63753e-07	7.60416	glutamate decarboxylase	Belongs to the group II decarboxylase family	0	0	ko00250,ko00410,ko00430,ko00650,ko01100,ko01110,ko01120,ko02024,ko04727,ko04940,map00250,map00410,map00430,map00650,map01100,map01110,map01120,map02024,map04727,map04940	Pyridoxal_deC	Yes
Within-group	Bulk-R_Infected_vs_Control	MD07G1301700	Chr07	36028838	36030828	-	4.26835	1.46644	3.92415	0.000169764	0.000581802	0.438093	Heavy metal transport/detoxification superfamily protein	Heavy-metal-associated domain	0	0	ko04978,map04978	HMA	Yes
Within-group	Bulk-R_Infected_vs_Control	MD13G1187400	Chr13	15939095	15940093	-	4.2669	-1.50939	7.6007	2.66704e-11	7.76635e-10	15.3216	alpha/beta-Hydrolases superfamily protein	NA	0	0	NA	NA	Yes
Within-group	Bulk-R_Infected_vs_Control	MD02G1121700	Chr02	9915789	9918893	+	4.26604	6.12204	7.39304	7.07195e-11	1.79763e-09	14.0994	Transmembrane amino acid transporter family protein	Lysine histidine transporter-like	0	0	NA	Aa_trans	Yes
Within-group	Bulk-R_Infected_vs_Control	MD07G1043400	Chr07	3678548	3679549	-	4.25955	4.47572	7.16609	2.03934e-10	4.49739e-09	13.2562	carboxyesterase 17	carboxylesterase 15	0	0	NA	Abhydrolase_3	Yes
Within-group	Bulk-R_Infected_vs_Control	MD05G1262700	Chr05	39755570	39757278	-	4.25933	6.10835	7.41723	6.3143e-11	1.63424e-09	14.2176	cytochrome P450	Cytochrome p450	0	0	NA	p450	Yes
Within-group	Bulk-R_Infected_vs_Control	MD16G1012000	Chr16	921448	923147	-	4.25647	-2.83847	6.99356	4.53768e-10	8.83291e-09	12.5899	NAD(P)-linked oxidoreductase superfamily protein	D-galacturonate reductase-like	0	0	ko00053,map00053	Aldo_ket_red	Yes
Within-group	Bulk-R_Infected_vs_Control	MD15G1116300	Chr15	8213784	8215798	+	4.2518	-1.8674	6.14834	2.0997e-08	2.3424e-07	9.02831	gibberellin 3-oxidase 1	Belongs to the iron ascorbate-dependent oxidoreductase family	0	0	ko00904,ko01110,map00904,map01110	2OG-FeII_Oxy,DIOX_N	Yes
Within-group	Bulk-R_Infected_vs_Control	MD10G1194200	Chr10	29106292	29108139	-	4.24926	4.9945	4.78535	6.63659e-06	3.38388e-05	3.06784	nine-cis-epoxycarotenoid dioxygenase 3	9-cis-epoxycarotenoid dioxygenase	0	0	ko00906,ko01100,ko01110,map00906,map01100,map01110	RPE65	Yes
Within-group	Bulk-R_Infected_vs_Control	MD00G1046200	Chr00	8623982	8625415	+	4.24214	1.90142	2.88959	0.00483107	0.0108118	-2.67319	UDP-glucosyl transferase 73B3	Belongs to the UDP-glycosyltransferase family	0	0	ko00906,ko01100,ko01110,map00906,map01100,map01110	UDPGT	Yes
Within-group	Bulk-R_Infected_vs_Control	MD04G1093500	Chr04	16944491	16945308	+	4.23341	-2.1414	6.4464	5.52934e-09	7.3585e-08	10.2687	NA	NA	0	0	NA	NA	No
Within-group	Bulk-R_Infected_vs_Control	MD17G1112300	Chr17	9621291	9624042	-	4.2271	-0.864727	6.81631	1.02659e-09	1.74985e-08	11.9149	Phototropic-responsive NPH3 family protein	Belongs to the NPH3 family	0	0	NA	BTB,NPH3	Yes
Within-group	Bulk-R_Infected_vs_Control	MD04G1093300	Chr04	16845888	16848581	+	4.22391	5.53025	9.32965	6.97702e-15	7.97599e-13	23.306	Heavy metal transport/detoxification superfamily protein	Axoneme-associated protein mst101(2)-like	0	0	NA	HMA	No
Within-group	Bulk-R_Infected_vs_Control	MD00G1036800	Chr00	6511425	6516185	+	4.22039	0.891167	5.30419	8.01405e-07	5.38912e-06	5.52796	white-brown complex homolog protein 11	ABC transporter G family member	0	0	NA	ABC2_membrane,ABC_tran	No
Within-group	Bulk-R_Infected_vs_Control	MD17G1055500	Chr17	4399043	4399786	-	4.22034	-1.32884	3.94138	0.000159695	0.000551266	0.680785	UDP-glucosyl transferase 71C4	Belongs to the UDP-glycosyltransferase family	0	0	NA	UDPGT	Yes
Within-group	Bulk-R_Infected_vs_Control	MD17G1036200	Chr17	2583672	2585114	+	4.21969	-1.78286	7.11089	2.63538e-10	5.57983e-09	13.1737	UDP-Glycosyltransferase superfamily protein	Belongs to the UDP-glycosyltransferase family	0	0	NA	UDPGT	Yes
Within-group	Bulk-R_Infected_vs_Control	MD02G1011200	Chr02	717845	720943	+	4.21836	2.54867	4.78427	6.66502e-06	3.39623e-05	3.35821	cysteine-rich RLK (RECEPTOR-like protein kinase) 34	Cysteine-rich receptor-like protein kinase	0	0	ko00520,ko01100,map00520,map01100	Glyco_hydro_18,Pkinase,Pkinase_Tyr	Yes
Within-group	Bulk-R_Infected_vs_Control	MD12G1150700	Chr12	23064286	23069942	-	4.21809	4.21337	3.45258	0.00084746	0.00237955	-1.44847	delta 1-pyrroline-5-carboxylate synthase 2	P5CS plays a key role in proline biosynthesis, leading to osmoregulation in plants	0	0	ko00330,ko01100,ko01110,ko01230,map00330,map01100,map01110,map01230	AA_kinase,Aldedh	Yes
Within-group	Bulk-R_Infected_vs_Control	MD05G1302400	Chr05	43483961	43487790	-	4.21256	-2.19412	6.53443	3.71355e-09	5.26471e-08	10.6564	basic helix-loop-helix (bHLH) DNA-binding superfamily protein	transcription factor	0	0	NA	HLH	Yes
Within-group	Bulk-R_Infected_vs_Control	MD07G1301600	Chr07	36024780	36025986	-	4.21051	0.81388	3.95501	0.000152138	0.000528449	0.58472	Heavy metal transport/detoxification superfamily protein	Heavy-metal-associated domain	0	0	NA	HMA	No
Within-group	Bulk-R_Infected_vs_Control	MD07G1209600	Chr07	28875231	28878706	+	4.19173	-0.329391	2.78095	0.00659872	0.0141814	-2.77485	NA	NA	0	0	NA	NA	No
Within-group	Bulk-R_Infected_vs_Control	MD00G1080800	Chr00	16132953	16136424	-	4.18522	6.36899	8.96778	3.96096e-14	3.25191e-12	21.485	FAD/NAD(P)-binding oxidoreductase family protein	squalene	0	0	ko00100,ko00909,ko01100,ko01110,ko01130,map00100,map00909,map01100,map01110,map01130	SE	Yes
Within-group	Bulk-R_Infected_vs_Control	MD05G1043200	Chr05	7354174	7357392	+	4.1851	5.54546	8.54266	3.03585e-13	1.75385e-11	19.55	Aldolase-type TIM barrel family protein	nitronate	0	0	NA	NMO	Yes
Within-group	Bulk-R_Infected_vs_Control	MD16G1148400	Chr16	11637617	11640226	-	4.18402	1.30518	3.13416	0.00232593	0.00571537	-2.0016	gibberellin 2-oxidase 6	Belongs to the iron ascorbate-dependent oxidoreductase family	0	0	ko00904,ko01110,map00904,map01110	2OG-FeII_Oxy,DIOX_N	No
Within-group	Bulk-R_Infected_vs_Control	MD13G1227600	Chr13	22267032	22268321	-	4.18198	-1.69088	6.86747	8.1156e-10	1.445e-08	12.1085	glutathione S-transferase TAU 8	Belongs to the GST superfamily	0	0	ko00480,ko00980,ko00982,ko00983,ko01524,ko05200,ko05204,ko05225,ko05418,map00480,map00980,map00982,map00983,map01524,map05200,map05204,map05225,map05418	GST_C,GST_C_2,GST_N	Yes
Within-group	Bulk-R_Infected_vs_Control	MD16G1160100	Chr16	12988861	12989340	+	4.1803	4.07217	4.84114	5.31526e-06	2.80475e-05	3.36955	MLP-like protein 423	Major allergen Pru	0	0	NA	Bet_v_1	Yes
Within-group	Bulk-R_Infected_vs_Control	MD08G1242900	Chr08	30838332	30842953	-	4.17943	4.81199	11.2281	8.14244e-19	4.46482e-16	32.3167	cytochrome P450	Cytochrome p450	0	0	ko00940,ko00941,ko00945,ko01100,ko01110,map00940,map00941,map00945,map01100,map01110	p450	Yes
Within-group	Bulk-R_Infected_vs_Control	MD04G1241000	Chr04	31824122	31827184	-	4.17784	-1.59362	3.8677	0.000207182	0.00069179	0.43611	Protein of unknown function	NA	0	0	NA	NA	No
Within-group	Bulk-R_Infected_vs_Control	MD05G1111800	Chr05	22879568	22882729	-	4.17772	-0.632395	3.03634	0.00313066	0.00739833	-2.08175	FAD/NAD(P)-binding oxidoreductase family protein	squalene	0	0	ko00100,ko00909,ko01100,ko01110,ko01130,map00100,map00909,map01100,map01110,map01130	SE	Yes
Within-group	Bulk-R_Infected_vs_Control	MD00G1137100	Chr00	29737079	29738841	+	4.1772	-2.66377	6.03639	3.44555e-08	3.59583e-07	8.54834	GDSL lipase 1	Belongs to the 'GDSL' lipolytic enzyme family	0	0	NA	Lipase_GDSL	Yes
Within-group	Bulk-R_Infected_vs_Control	MD01G1230700	Chr01	32002942	32004564	+	4.17294	1.05801	4.29618	4.37721e-05	0.000177636	1.74262	Major facilitator superfamily protein	UNC93-like protein	0	0	NA	MFS_1,UNC-93	No
Within-group	Bulk-R_Infected_vs_Control	MD14G1228300	Chr14	30928624	30930025	+	4.17158	1.9309	5.45818	4.19549e-07	3.08556e-06	6.08317	Core-2/I-branching beta-1	Core-2/I-Branching enzyme	0	0	NA	Branch	Yes
Within-group	Bulk-R_Infected_vs_Control	MD14G1224300	Chr14	30526719	30529710	+	4.16953	-1.59969	5.47442	3.9169e-07	2.92048e-06	6.28239	Cytochrome P450 superfamily protein	Cytochrome p450	0	0	NA	p450	No
Within-group	Bulk-R_Infected_vs_Control	MD16G1202100	Chr16	18385681	18387922	-	4.15892	0.427824	5.61103	2.18922e-07	1.76491e-06	6.79317	calmodulin-like 11	Calmodulin-like protein	0	0	ko04014,ko04015,ko04016,ko04020,ko04022,ko04024,ko04070,ko04114,ko04218,ko04261,ko04270,ko04371,ko04626,ko04713,ko04720,ko04722,ko04728,ko04740,ko04744,ko04745,ko04750,ko04910,ko04912,ko04915,ko04916,ko04921,ko04922,ko04924,ko04925,ko04970,ko04971,ko05010,ko05031,ko05034,ko05133,ko05152,ko05167,ko05200,ko05214,ko05418,map04014,map04015,map04016,map04020,map04022,map04024,map04070,map04114,map0421…	EF-hand_1,EF-hand_7	Yes
Within-group	Bulk-R_Infected_vs_Control	MD02G1081600	Chr02	6399988	6403120	+	4.1585	-0.858036	5.00088	2.79424e-06	1.59631e-05	4.42036	basic helix-loop-helix (bHLH) DNA-binding family protein	transcription factor	0	0	NA	HLH	Yes
Within-group	Bulk-R_Infected_vs_Control	MD08G1104900	Chr08	8903630	8905952	+	4.15843	-1.45393	4.04301	0.000110978	0.000400887	1.00877	phospholipase A 2A	Lipolytic acyl hydrolase (LAH)	0	0	NA	Patatin	No
Within-group	Bulk-R_Infected_vs_Control	MD00G1143600	Chr00	31240990	31242443	+	4.15322	-0.353597	3.41311	0.000963774	0.00265746	-1.03439	WRKY DNA-binding protein 40	WRKY transcription factor	0	0	NA	WRKY	No
Within-group	Bulk-R_Infected_vs_Control	MD01G1148700	Chr01	25741958	25744003	+	4.1508	4.55991	9.45097	3.89783e-15	4.98429e-13	23.9406	UDP-Glycosyltransferase superfamily protein	UDP-glycosyltransferase 76F1-like	0	0	ko00140,ko00380,ko00402,ko00830,ko00908,ko00980,ko01100,ko01110,ko04913,ko05204,map00140,map00380,map00402,map00830,map00908,map00980,map01100,map01110,map04913,map05204	UDPGT	Yes
Within-group	Bulk-R_Infected_vs_Control	MD11G1272500	Chr11	38917316	38927797	-	4.15055	3.4788	5.61495	2.15271e-07	1.74111e-06	6.59714	senescence-related gene 1	Belongs to the iron ascorbate-dependent oxidoreductase family	0	0	NA	2OG-FeII_Oxy,DIOX_N	Yes
Within-group	Bulk-R_Infected_vs_Control	MD05G1298100	Chr05	43162442	43163595	+	4.14746	-2.66861	6.48535	4.63741e-09	6.37609e-08	10.4248	Leucine-rich repeat protein kinase family protein	LRR receptor-like serine threonine-protein kinase	0	0	ko04010,ko04016,ko04064,ko04620,ko04621,ko04624,ko04626,ko04722,ko05133,ko05140,ko05142,ko05145,ko05152,ko05162,ko05164,ko05169,map04010,map04016,map04064,map04620,map04621,map04624,map04626,map04722,map05133,map05140,map05142,map05145,map05152,map05162,map05164,map05169	LRRNT_2,LRR_1,LRR_8,Pkinase,Pkinase_Tyr	Yes
Within-group	Bulk-R_Infected_vs_Control	MD12G1089500	Chr12	11168774	11170676	-	4.147	3.75097	3.69887	0.000371901	0.00115634	-0.683816	Glycosyl hydrolase superfamily protein	Belongs to the glycosyl hydrolase 17 family	0	0	NA	Glyco_hydro_17	Yes
Within-group	Bulk-R_Infected_vs_Control	MD12G1181900	Chr12	26162654	26163953	+	4.1459	0.815394	3.38097	0.00106938	0.00290581	-1.24168	NAD(P)-binding Rossmann-fold superfamily protein	short-chain dehydrogenase reductase	0	0	NA	adh_short,adh_short_C2	No
Within-group	Bulk-R_Infected_vs_Control	MD02G1068900	Chr02	5591215	5594532	+	4.14539	2.15886	4.48051	2.17881e-05	9.59034e-05	2.28523	phosphofructokinase 3	Catalyzes the phosphorylation of D-fructose 6-phosphate to fructose 1,6-bisphosphate by ATP, the first committing step of glycolysis	0	0	ko00010,ko00030,ko00051,ko00052,ko00680,ko01100,ko01110,ko01120,ko01130,ko01200,ko01230,ko03018,ko04152,ko05230,map00010,map00030,map00051,map00052,map00680,map01100,map01110,map01120,map01130,map01200,map01230,map03018,map04152,map05230	PFK	Yes
Within-group	Bulk-R_Infected_vs_Control	MD12G1079300	Chr12	9679614	9683728	+	4.14321	2.5097	7.12895	2.42348e-10	5.21793e-09	13.2799	heat shock transcription factor B3	Heat Stress Transcription Factor	0	0	NA	HSF_DNA-bind	Yes
Within-group	Bulk-R_Infected_vs_Control	MD10G1097200	Chr10	15470442	15474491	-	4.141	4.83642	7.68023	1.83332e-11	5.67024e-10	15.5705	GroES-like zinc-binding alcohol dehydrogenase family protein	Cinnamyl alcohol dehydrogenase	0	0	ko00940,ko01100,ko01110,map00940,map01100,map01110	ADH_N,ADH_zinc_N	Yes
Within-group	Bulk-R_Infected_vs_Control	MD15G1275500	Chr15	24210275	24212334	+	4.14016	5.13307	8.79622	9.01611e-14	6.29998e-12	20.7462	methyl esterase 1	salicylic acid-binding protein 2-like	0	0	ko00460,ko01110,map00460,map01110	Abhydrolase_1,Abhydrolase_6	Yes
Within-group	Bulk-R_Infected_vs_Control	MD10G1258100	Chr10	35225543	35227426	-	4.13861	3.58366	6.59197	2.86011e-09	4.21167e-08	10.7629	NA	NA	0	0	NA	NA	Yes
Within-group	Bulk-R_Infected_vs_Control	MD02G1200700	Chr02	19804842	19806865	-	4.1329	-1.87653	5.92982	5.5034e-08	5.36607e-07	8.12245	cytochrome P450	Cytochrome p450	0	0	NA	p450	No
Within-group	Bulk-R_Infected_vs_Control	MD01G1090500	Chr01	20534313	20536652	+	4.13238	-2.10667	6.89877	7.02664e-10	1.28071e-08	12.2085	O-methyltransferase 1	Belongs to the class I-like SAM-binding methyltransferase superfamily. Cation-independent O- methyltransferase family	0	0	ko00940,ko01058,ko01100,ko01110,map00940,map01058,map01100,map01110	Dimerisation,Methyltransf_2	No
Within-group	Bulk-R_Infected_vs_Control	MD12G1129400	Chr12	20460252	20463131	-	4.12989	7.48805	11.2996	5.8112e-19	3.55398e-16	32.5174	Glutathione S-transferase family protein	Glutathione S-transferase	0	0	ko00480,ko00980,ko00982,ko00983,ko01524,ko05200,ko05204,ko05225,ko05418,map00480,map00980,map00982,map00983,map01524,map05200,map05204,map05225,map05418	GST_C_2,GST_N_3	Yes
Within-group	Bulk-R_Infected_vs_Control	MD14G1016400	Chr14	1478858	1480465	+	4.12628	0.662751	5.89609	6.37843e-08	6.07462e-07	7.96862	D-mannose binding lectin protein with Apple-like carbohydrate-binding domain	PAN domain-containing protein	0	0	NA	B_lectin,PAN_1,PAN_2,S_locus_glycop	Yes
Within-group	Bulk-R_Infected_vs_Control	MD17G1064900	Chr17	5252051	5255169	+	4.12611	-1.73183	3.89029	0.00019135	0.000645464	0.51407	reversibly glycosylated polypeptide 2	Reversibly glycosylated polypeptide	0	0	ko00520,map00520	RGP	Yes
Within-group	Bulk-R_Infected_vs_Control	MD09G1094400	Chr09	6861657	6871001	+	4.1252	2.80289	4.21151	5.99674e-05	0.000233997	1.25962	receptor kinase 3	serine threonine-protein kinase	0	0	NA	B_lectin,DUF3403,PAN_2,Pkinase,Pkinase_Tyr,S_locus_glycop	Yes
Within-group	Bulk-R_Infected_vs_Control	MD14G1114700	Chr14	18584000	18584647	+	4.12373	2.75594	4.43024	2.63974e-05	0.000113444	2.01765	Late embryogenesis abundant (LEA) hydroxyproline-rich glycoprotein family	Late embryogenesis abundant protein	0	0	NA	LEA_2	Yes
Within-group	Bulk-R_Infected_vs_Control	MD05G1287100	Chr05	41959737	41960264	-	4.12186	-2.02396	4.39177	3.05479e-05	0.000129103	2.21877	AGAMOUS-like 29	Agamous-like MADS-box protein	0	0	ko04010,ko04013,ko04022,ko04371,ko04921,ko05202,ko05418,map04010,map04013,map04022,map04371,map04921,map05202,map05418	SRF-TF	Yes
Within-group	Bulk-R_Infected_vs_Control	MD17G1267700	Chr17	32772480	32772848	-	4.12034	1.89673	6.3258	9.51218e-09	1.17278e-07	9.74704	carbon-sulfur lyases	NA	0	0	NA	NA	Yes
Within-group	Bulk-R_Infected_vs_Control	MD05G1112100	Chr05	22970009	22973213	-	4.1161	-0.815446	6.02518	3.62003e-08	3.75128e-07	8.5288	FAD/NAD(P)-binding oxidoreductase family protein	Squalene monooxygenase-like	0	0	ko00100,ko00909,ko01100,ko01110,ko01130,map00100,map00909,map01100,map01110,map01130	SE	Yes
Between-groups	Bulk-R_vs_Bulk-S_Infected	MD10G1088200	Chr10	13057763	13058473	+	1.84039	-3.48866	4.10951	8.71979e-05	0.0344027	1.0231	2-oxoglutarate (2OG) and Fe(II)-dependent oxygenase superfamily protein	Belongs to the iron ascorbate-dependent oxidoreductase family	0	0	NA	2OG-FeII_Oxy,DIOX_N	Yes
Within-group	Bulk-R_Infected_vs_Control	MD07G1070700	Chr07	6679087	6685917	-	4.11219	1.99798	7.25728	1.3337e-10	3.11545e-09	13.8725	Protein kinase superfamily protein	receptor-like protein kinase	0	0	NA	GUB_WAK_bind,Pkinase,Pkinase_Tyr	Yes
Within-group	Bulk-R_Infected_vs_Control	MD07G1172200	Chr07	24925341	24926534	-	4.11143	1.72237	4.49945	2.02624e-05	9.0045e-05	2.42032	Protein kinase superfamily protein	lysM domain receptor-like kinase	0	0	ko04010,ko04064,ko04620,ko04621,ko04624,ko04722,ko05133,ko05140,ko05142,ko05145,ko05152,ko05162,ko05164,map04010,map04064,map04620,map04621,map04624,map04722,map05133,map05140,map05142,map05145,map05152,map05162,map05164	Pkinase,Pkinase_Tyr	Yes
Within-group	Bulk-R_Infected_vs_Control	MD03G1076300	Chr03	6207177	6209027	+	4.11131	-2.76657	4.83664	5.41143e-06	2.84779e-05	3.83757	NA	NA	0	0	NA	NA	No
Within-group	Bulk-R_Infected_vs_Control	MD04G1195000	Chr04	28393357	28394500	+	4.10953	0.158651	5.46547	4.06818e-07	3.00969e-06	6.21143	Glycine-rich protein family	NA	0	0	NA	NA	Yes
Within-group	Bulk-R_Infected_vs_Control	MD05G1329900	Chr05	45461670	45465179	+	4.10722	-0.531533	8.87118	6.29457e-14	4.75799e-12	21.1356	S-domain-1 29	NA	0	0	NA	NA	Yes
Within-group	Bulk-R_Infected_vs_Control	MD05G1320800	Chr05	44810753	44812510	+	4.10584	1.91888	2.87246	0.00507723	0.0112916	-2.78373	Polyphenol oxidase	Polyphenol oxidase	0	0	ko00350,ko00950,ko01100,ko01110,map00350,map00950,map01100,map01110	PPO1_DWL,PPO1_KFDV,Tyrosinase	Yes
Within-group	Bulk-R_Infected_vs_Control	MD17G1233600	Chr17	28221868	28222635	+	4.10544	-1.15016	6.92328	6.27642e-10	1.16631e-08	12.3546	RING/U-box superfamily protein	E3 ubiquitin-protein ligase	0	0	NA	zf-RING_2	Yes
Within-group	Bulk-R_Infected_vs_Control	MD11G1061600	Chr11	5351936	5353039	-	4.10515	-1.08064	8.0774	2.79342e-12	1.12684e-10	17.4951	LOB domain-containing protein 13	LOB domain-containing protein	0	0	NA	LOB	No
Within-group	Bulk-R_Infected_vs_Control	MD05G1219200	Chr05	34967580	34967930	+	4.10348	-2.36955	5.43496	4.62816e-07	3.36094e-06	6.12416	Protein of unknown function	NA	0	0	NA	NA	No
Within-group	Bulk-R_Infected_vs_Control	MD04G1236900	Chr04	31554468	31556762	+	4.10021	4.17787	6.73077	1.51907e-09	2.44746e-08	11.2614	Subtilisin-like serine endopeptidase family protein	subtilisin-like protease	0	0	NA	Inhibitor_I9,Peptidase_S8	Yes
Within-group	Bulk-R_Infected_vs_Control	MD02G1318100	Chr02	37259035	37261467	+	4.09997	-1.20086	4.20359	6.17493e-05	0.00024011	1.53334	receptor-like protein kinase 1	G-type lectin S-receptor-like serine threonine-protein kinase	0	0	NA	B_lectin,PAN_2,Pkinase,Pkinase_Tyr,S_locus_glycop	Yes
Within-group	Bulk-R_Infected_vs_Control	MD09G1142500	Chr09	11116604	11118334	+	4.09995	2.79281	5.34944	6.63213e-07	4.59744e-06	5.58393	UDP-Glycosyltransferase superfamily protein	NA	0	0	NA	NA	Yes
Within-group	Bulk-R_Infected_vs_Control	MD05G1290000	Chr05	42190034	42191868	-	4.09636	3.29441	6.14737	2.10871e-08	2.35002e-07	8.81781	purine permease 10	purine permease	0	0	NA	PUNUT	Yes
Within-group	Bulk-R_Infected_vs_Control	MD16G1282900	Chr16	38910995	38911714	+	4.09319	-0.0252027	5.81906	8.92286e-08	8.13849e-07	7.65937	NA	NA	0	0	NA	NA	No
Within-group	Bulk-R_Infected_vs_Control	MD11G1071800	Chr11	6108182	6114960	+	4.09284	-0.515246	6.82293	9.95864e-10	1.70647e-08	11.9491	Protein of unknown function	NA	0	0	NA	NA	Yes
Within-group	Bulk-R_Infected_vs_Control	MD11G1275800	Chr11	39289197	39295165	+	4.09211	4.16785	5.23425	1.07224e-06	6.91708e-06	4.94838	Calcium-dependent lipid-binding (CaLB domain) family protein	C2 domain-containing protein	0	0	ko00290,ko00650,ko00660,ko00770,ko01100,ko01110,ko01130,ko01210,ko01230,map00290,map00650,map00660,map00770,map01100,map01110,map01130,map01210,map01230	C2,SMP_LBD	No
Within-group	Bulk-R_Infected_vs_Control	MD09G1107000	Chr09	7760051	7761387	-	4.09176	0.684102	8.82988	7.67285e-14	5.56574e-12	21.0661	Protein of unknown function	NA	0	0	NA	NA	Yes
Within-group	Bulk-R_Infected_vs_Control	MD05G1056000	Chr05	9851316	9852044	-	4.08498	2.87677	5.3159	7.6316e-07	5.16738e-06	5.42618	Receptor-like protein kinase-related family protein	Cysteine-rich repeat secretory protein	0	0	NA	DUF1204,Stress-antifung	No
Within-group	Bulk-R_Infected_vs_Control	MD06G1160900	Chr06	30207352	30209249	+	4.08141	3.08232	3.86787	0.00020706	0.000691453	0.0422959	peptide met sulfoxide reductase 4	Peptide methionine sulfoxide reductase-like	0	0	NA	PMSR	Yes
Within-group	Bulk-R_Infected_vs_Control	MD02G1273000	Chr02	32728832	32730169	-	4.08118	2.35953	5.50626	3.42218e-07	2.60199e-06	6.23156	HXXXD-type acyl-transferase family protein	BAHD acyltransferase At5g47980-like	0	0	ko00940,ko00941,ko00945,ko01100,ko01110,map00940,map00941,map00945,map01100,map01110	Transferase	Yes
Within-group	Bulk-R_Infected_vs_Control	MD10G1110000	Chr10	18087718	18088297	-	4.0805	-1.15527	6.03697	3.43667e-08	3.58771e-07	8.57633	phytosulfokine 4 precursor	Phytosulfokines	0	0	NA	PSK	Yes
Within-group	Bulk-R_Infected_vs_Control	MD02G1119700	Chr02	9720692	9723847	+	4.07319	2.80569	4.79094	6.49106e-06	3.31909e-05	3.41823	isocitrate dehydrogenase 1	Isocitrate dehydrogenase NAD regulatory subunit 1	0	0	ko00020,ko01100,ko01110,ko01120,ko01130,ko01200,ko01210,ko01230,map00020,map01100,map01110,map01120,map01130,map01200,map01210,map01230	Iso_dh	Yes
Within-group	Bulk-R_Infected_vs_Control	MD01G1118200	Chr01	23210555	23211439	+	4.07091	2.98324	5.23922	1.05034e-06	6.79613e-06	5.12937	NA	NA	0	0	NA	NA	Yes
Within-group	Bulk-R_Infected_vs_Control	MD08G1175700	Chr08	21343346	21343884	-	4.06826	2.80346	5.19155	1.27964e-06	8.06681e-06	4.92926	NA	NA	0	0	NA	NA	Yes
Within-group	Bulk-R_Infected_vs_Control	MD05G1262600	Chr05	39744110	39745841	-	4.06365	4.96103	5.33521	7.03933e-07	4.82492e-06	5.17781	cytochrome P450	Cytochrome p450	0	0	NA	p450	Yes
Within-group	Bulk-R_Infected_vs_Control	MD01G1029200	Chr01	10689007	10691133	+	4.06217	-2.49279	4.11899	8.42339e-05	0.0003153	1.2873	UDP-glucosyl transferase 85A2	Belongs to the UDP-glycosyltransferase family	0	0	NA	UDPGT	Yes
Within-group	Bulk-R_Infected_vs_Control	MD00G1052900	Chr00	9794842	9796734	-	4.06136	2.44875	8.29281	1.0014e-12	4.82102e-11	18.6242	UDP-glucosyl transferase 85A2	Belongs to the UDP-glycosyltransferase family	0	0	NA	UDPGT	Yes
Within-group	Bulk-R_Infected_vs_Control	MD10G1214100	Chr10	31249134	31250042	+	4.06127	-1.00193	6.02353	3.6464e-08	3.77498e-07	8.52094	NA	NA	0	0	NA	NA	No
Within-group	Bulk-R_Infected_vs_Control	MD10G1142200	Chr10	22794527	22797768	+	4.06034	3.47364	4.65639	1.10304e-05	5.28284e-05	2.73355	phosphate transporter 3	Belongs to the mitochondrial carrier (TC 2.A.29) family	0	0	NA	Mito_carr	Yes
Within-group	Bulk-R_Infected_vs_Control	MD08G1095800	Chr08	8029334	8031921	-	4.0589	0.581777	6.85553	8.57334e-10	1.50824e-08	12.1003	SPla/RYanodine receptor (SPRY) domain-containing protein	NA	0	0	NA	SPRY	Yes
Within-group	Bulk-R_Infected_vs_Control	MD13G1043300	Chr13	3035898	3037248	+	4.05405	1.55133	5.91885	5.77404e-08	5.58618e-07	8.01757	Glycolipid transfer protein (GLTP) family protein	transfer	0	0	NA	GLTP	Yes
Within-group	Bulk-R_Infected_vs_Control	MD00G1141700	Chr00	30873377	30876638	-	4.05182	6.5269	9.85192	5.69845e-16	1.00741e-13	25.693	NAD(P)-linked oxidoreductase superfamily protein	Aldo-keto reductase family 4 member	0	0	ko00010,ko00040,ko00561,ko00930,ko01100,ko01110,ko01120,ko01130,ko01220,map00010,map00040,map00561,map00930,map01100,map01110,map01120,map01130,map01220	Aldo_ket_red	Yes
Within-group	Bulk-R_Infected_vs_Control	MD11G1061800	Chr11	5381641	5384334	-	4.04528	3.72704	5.96425	4.73242e-08	4.71958e-07	8.01061	UDP-Glycosyltransferase superfamily protein	UDP-glycosyltransferase 87A1-like	0	0	NA	UDPGT	Yes
Within-group	Bulk-R_Infected_vs_Control	MD13G1042500	Chr13	2955764	2957804	+	4.04476	0.830679	6.48399	4.66609e-09	6.4128e-08	10.4702	NAD(P)-binding Rossmann-fold superfamily protein	Tetraketide alpha-pyrone reductase 2-like	0	0	NA	Epimerase	Yes
Within-group	Bulk-R_Infected_vs_Control	MD03G1035600	Chr03	2845452	2846238	-	4.04002	-2.40513	4.33295	3.81365e-05	0.000157412	2.01775	potassium channel tetramerisation domain-containing protein / pentapeptide repeat-containing protein	FH protein interacting protein	0	0	NA	BTB_2,Pentapeptide	No
Within-group	Bulk-R_Infected_vs_Control	MD16G1002700	Chr16	171057	172988	-	4.03951	2.22475	5.96019	4.81742e-08	4.79253e-07	8.15275	Protein of unknown function	NA	0	0	NA	NA	Yes
Within-group	Bulk-R_Infected_vs_Control	MD06G1090600	Chr06	21948037	21951007	-	4.03852	3.97524	4.94678	3.4782e-06	1.93464e-05	3.77051	1-aminocyclopropane-1-carboxylic acid (acc) synthase 6	1-aminocyclopropane-1-carboxylate	0	0	ko00270,ko01100,ko01110,ko04016,map00270,map01100,map01110,map04016	Aminotran_1_2	Yes
Within-group	Bulk-R_Infected_vs_Control	MD02G1258100	Chr02	31149676	31152984	+	4.0367	-1.60137	5.20355	1.21765e-06	7.72421e-06	5.21889	Protein of unknown function	N-terminal C2 in EEIG1 and EHBP1 proteins	0	0	NA	NT-C2	Yes
Within-group	Bulk-R_Infected_vs_Control	MD03G1010400	Chr03	802304	803254	-	4.03632	1.96031	5.26314	9.5095e-07	6.24546e-06	5.32595	Family of unknown function (DUF716)	Family of unknown function (DUF716)	0	0	NA	DUF716	Yes
Within-group	Bulk-R_Infected_vs_Control	MD08G1181000	Chr08	22400712	22404449	-	4.03513	0.19979	4.38161	3.17447e-05	0.000133725	2.08815	tetratricopeptide repeat (TPR)-containing protein	TPR repeat-containing thioredoxin	0	0	NA	TPR_1,TPR_11,TPR_16,TPR_17,TPR_2,TPR_7,TPR_8,Thioredoxin	Yes
Within-group	Bulk-R_Infected_vs_Control	MD02G1152000	Chr02	12535384	12538484	-	4.03241	-2.03176	4.07366	9.93312e-05	0.000364019	1.12156	RmlC-like cupins superfamily protein	Cupin	0	0	NA	Cupin_1	No
Within-group	Bulk-R_Infected_vs_Control	MD13G1061500	Chr13	4315870	4318630	-	4.03228	0.930036	7.18996	1.82502e-10	4.09452e-09	13.587	methyl esterase 13	Alpha/beta hydrolase family	0	0	NA	Abhydrolase_1	Yes
Within-group	Bulk-R_Infected_vs_Control	MD14G1075200	Chr14	8530508	8532527	+	4.03075	3.35969	8.25816	1.18128e-12	5.55478e-11	18.4301	heat shock transcription factor B3	Heat Stress Transcription Factor	0	0	NA	HSF_DNA-bind	Yes
Within-group	Bulk-R_Infected_vs_Control	MD05G1179100	Chr05	30681752	30685322	-	4.03062	7.41597	9.32248	7.22143e-15	8.19747e-13	23.1409	peroxisomal 3-ketoacyl-CoA thiolase 3	Belongs to the thiolase family	0	0	ko00071,ko00280,ko00592,ko01040,ko01100,ko01110,ko01130,ko01212,ko03320,ko04146,map00071,map00280,map00592,map01040,map01100,map01110,map01130,map01212,map03320,map04146	Thiolase_C,Thiolase_N	Yes
Within-group	Bulk-R_Infected_vs_Control	MD05G1266000	Chr05	40081637	40083262	+	4.02705	-2.32515	3.1978	0.00191075	0.00481941	-1.54499	FAD-binding Berberine family protein	Belongs to the oxygen-dependent FAD-linked oxidoreductase family	0	0	NA	BBE,FAD_binding_4	No
Within-group	Bulk-R_Infected_vs_Control	MD13G1194000	Chr13	16795928	16797455	-	4.02568	-2.80679	5.11493	1.75434e-06	1.06027e-05	4.88288	Seed maturation protein	late embryogenesis abundant protein	0	0	NA	SMP	No
Within-group	Bulk-R_Infected_vs_Control	MD10G1053200	Chr10	7136869	7138539	+	4.02271	3.02977	5.88098	6.81356e-08	6.43974e-07	7.67196	2-oxoglutarate (2OG) and Fe(II)-dependent oxygenase superfamily protein	Belongs to the iron ascorbate-dependent oxidoreductase family	0	0	NA	2OG-FeII_Oxy,DIOX_N	No
Within-group	Bulk-R_Infected_vs_Control	MD03G1291000	Chr03	36838382	36840289	-	4.0212	-2.19238	4.70511	9.11193e-06	4.4776e-05	3.34351	Plant invertase/pectin methylesterase inhibitor superfamily	pectinesterase pectinesterase inhibitor	0	0	ko00040,ko01100,map00040,map01100	PMEI,Pectinesterase	Yes
Within-group	Bulk-R_Infected_vs_Control	MD17G1226700	Chr17	27479377	27482380	+	4.01786	-0.457532	4.06397	0.000102881	0.000375201	1.02122	ARIA-interacting double AP2 domain protein	AP2-like ethylene-responsive transcription factor	0	0	NA	AP2	No
Within-group	Bulk-R_Infected_vs_Control	MD09G1033700	Chr09	2067175	2068982	-	4.00968	-0.150567	3.00391	0.00344991	0.0080522	-2.19663	Oxidoreductase	2-methylene-furan-3-one reductase-like	0	0	NA	ADH_N,ADH_zinc_N,ADH_zinc_N_2	No
Within-group	Bulk-R_Infected_vs_Control	MD07G1004500	Chr07	488751	492747	-	4.00951	4.67871	5.72336	1.35064e-07	1.15996e-06	6.85578	lipoxygenase 2	Plant lipoxygenase may be involved in a number of diverse aspects of plant physiology including growth and development, pest resistance, and senescence or responses to wounding	0	0	ko00591,ko00592,ko01100,ko01110,map00591,map00592,map01100,map01110	Lipoxygenase,PLAT	No
Within-group	Bulk-R_Infected_vs_Control	MD10G1240500	Chr10	33600363	33602290	-	4.00678	5.63506	5.84144	8.09501e-08	7.46763e-07	7.19963	cytochrome P450	Cytochrome p450	0	0	NA	p450	Yes
Within-group	Bulk-R_Infected_vs_Control	MD13G1004200	Chr13	250231	256028	-	4.00556	-2.34405	5.42282	4.8715e-07	3.51556e-06	6.07802	serine carboxypeptidase-like 34	Belongs to the peptidase S10 family	0	0	NA	Peptidase_S10	No
Within-group	Bulk-R_Infected_vs_Control	MD02G1025600	Chr02	1930059	1930701	+	4.00419	3.3931	3.62434	0.000478982	0.00144055	-0.743397	Raffinose synthase family protein	Raffinose synthase or seed imbibition protein Sip1	0	0	ko00052,map00052	Raffinose_syn	No
Within-group	Bulk-R_Infected_vs_Control	MD11G1054200	Chr11	4623572	4623877	-	4.00209	-2.58782	5.20845	1.19323e-06	7.59012e-06	5.24154	lipid transfer protein 1	Plant lipid transfer protein / seed storage protein / trypsin-alpha amylase inhibitor domain family	0	0	NA	Tryp_alpha_amyl	No
Within-group	Bulk-R_Infected_vs_Control	MD03G1048800	Chr03	3921490	3928273	-	4.00044	0.74618	3.52007	0.000678679	0.00195901	-0.803588	Leucine-rich repeat protein kinase family protein	Belongs to the protein kinase superfamily. Ser Thr protein kinase family	0	0	NA	LRRNT_2,LRR_8,Pkinase,Pkinase_Tyr	Yes
Within-group	Bulk-R_Infected_vs_Control	MD15G1434600	Chr15	53484450	53485112	-	4.00006	0.240614	5.3885	5.62896e-07	3.98372e-06	5.89099	Protein of unknown function (DUF679)	NA	0	0	NA	NA	No
Within-group	Bulk-R_Infected_vs_Control	MD10G1308000	Chr10	39329654	39333182	+	3.99277	2.58566	6.00373	3.97859e-08	4.06555e-07	8.30319	S-locus lectin protein kinase family protein	G-type lectin S-receptor-like serine threonine-protein kinase	0	0	NA	B_lectin,DUF3403,PAN_2,Pkinase_Tyr,S_locus_glycop	Yes
Within-group	Bulk-R_Infected_vs_Control	MD09G1162700	Chr09	13218642	13219654	-	3.9883	-0.486263	4.2261	5.68172e-05	0.000223131	1.57832	23 kDa jasmonate-induced protein	23 kDa jasmonate-induced protein-like	0	0	NA	NA	Yes
Within-group	Bulk-R_Infected_vs_Control	MD15G1033100	Chr15	2329380	2333217	-	3.98123	-1.702	6.38017	7.45154e-09	9.57395e-08	10.0125	cytochrome P450	Belongs to the cytochrome P450 family	0	0	ko00140,ko01100,ko04913,ko04917,ko04927,ko04934,map00140,map01100,map04913,map04917,map04927,map04934	p450	Yes
Within-group	Bulk-R_Infected_vs_Control	MD15G1339000	Chr15	38274345	38275494	+	3.9787	-1.21605	4.39228	3.04888e-05	0.00012887	2.20389	NA	NA	0	0	NA	NA	No
Within-group	Bulk-R_Infected_vs_Control	MD01G1043300	Chr01	14194872	14201482	-	3.97393	3.80907	5.42086	4.91191e-07	3.54057e-06	5.71918	Rhamnogalacturonate lyase family protein	Rhamnogalacturonate lyase	0	0	NA	CBM-like,Rhamnogal_lyase,fn3_3	Yes
Within-group	Bulk-R_Infected_vs_Control	MD11G1232500	Chr11	33882812	33886711	-	3.97212	4.62774	7.2635	1.2956e-10	3.04073e-09	13.6205	S-locus lectin protein kinase family protein	Serine threonine-protein kinase	0	0	NA	B_lectin,DUF3403,PAN_2,Pkinase_Tyr,S_locus_glycop	Yes
Within-group	Bulk-R_Infected_vs_Control	MD04G1139600	Chr04	22779085	22780589	+	3.97191	-2.11085	5.41367	5.06302e-07	3.6319e-06	6.0421	glutathione S-transferase TAU 8	Belongs to the GST superfamily	0	0	ko00480,ko00980,ko00982,ko00983,ko01524,ko05200,ko05204,ko05225,ko05418,map00480,map00980,map00982,map00983,map01524,map05200,map05204,map05225,map05418	GST_C,GST_N,GST_N_3	Yes
Within-group	Bulk-R_Infected_vs_Control	MD08G1242500	Chr08	30817411	30818461	-	3.97024	1.5177	6.47482	4.86347e-09	6.61939e-08	10.4071	S-adenosyl-L-methionine-dependent methyltransferases superfamily protein	methyltransferase DDB_G0268948	0	0	NA	Methyltransf_11	Yes
Within-group	Bulk-R_Infected_vs_Control	MD12G1061900	Chr12	7240182	7249067	+	3.96792	-0.264914	6.71331	1.64527e-09	2.62206e-08	11.4731	bZIP transcription factor family protein	Transcription factor	0	0	ko04075,map04075	DOG1,bZIP_1,bZIP_2	No
Within-group	Bulk-R_Infected_vs_Control	MD03G1214200	Chr03	29388108	29388937	-	3.96742	5.06758	9.00784	3.26843e-14	2.77488e-12	21.8161	NAD(P)-binding Rossmann-fold superfamily protein	Short-chain type dehydrogenase	0	0	ko00061,ko00333,ko00780,ko01040,ko01100,ko01130,ko01212,map00061,map00333,map00780,map01040,map01100,map01130,map01212	adh_short_C2	Yes
Within-group	Bulk-R_Infected_vs_Control	MD04G1197700	Chr04	28562770	28564959	+	3.96518	-0.989748	3.53658	0.00064252	0.001867	-0.643359	phloem protein 2-B15	f-box protein	0	0	NA	F-box,PP2	Yes
Within-group	Bulk-R_Infected_vs_Control	MD15G1436500	Chr15	53651165	53655331	-	3.9639	2.63378	7.14653	2.23346e-10	4.86906e-09	13.3478	cytochrome P450	Cytochrome p450	0	0	ko00940,ko00941,ko00945,ko01100,ko01110,map00940,map00941,map00945,map01100,map01110	p450	No
Within-group	Bulk-R_Infected_vs_Control	MD01G1178300	Chr01	27858427	27860114	-	3.95773	-0.740399	5.8216	8.82485e-08	8.06274e-07	7.6855	Major facilitator superfamily protein	Belongs to the major facilitator superfamily. Sugar transporter (TC 2.A.1.1) family	0	0	NA	Sugar_tr	No
Within-group	Bulk-R_Infected_vs_Control	MD05G1356900	Chr05	47240551	47241662	-	3.95472	0.777209	2.60465	0.0107563	0.0216666	-3.3376	Protein of unknown function (DUF506)	PDDEXK-like family of unknown function	0	0	NA	PDDEXK_6	No
Within-group	Bulk-R_Infected_vs_Control	MD05G1127900	Chr05	25136908	25139719	-	3.95469	1.97474	2.90298	0.00464633	0.010454	-2.68953	O-methyltransferase family protein	Belongs to the class I-like SAM-binding methyltransferase superfamily. Cation-independent O- methyltransferase family	0	0	NA	Dimerisation,Methyltransf_2	No
Within-group	Bulk-R_Infected_vs_Control	MD10G1312500	Chr10	39694016	39696840	-	3.94781	0.50573	5.09812	1.87959e-06	1.124e-05	4.77179	cysteine-rich RLK (RECEPTOR-like protein kinase) 26	Cysteine-rich receptor-like protein kinase	0	0	ko04010,ko04064,ko04620,ko04621,ko04624,ko04722,ko05133,ko05140,ko05142,ko05145,ko05152,ko05162,ko05164,map04010,map04064,map04620,map04621,map04624,map04722,map05133,map05140,map05142,map05145,map05152,map05162,map05164	Pkinase,Pkinase_Tyr,Stress-antifung	Yes
Within-group	Bulk-R_Infected_vs_Control	MD05G1040300	Chr05	6871948	6873466	+	3.94373	-2.5264	7.48004	4.70321e-11	1.26799e-09	14.7162	GRAS family transcription factor	Belongs to the GRAS family	0	0	NA	GRAS	Yes
Within-group	Bulk-R_Infected_vs_Control	MD08G1011400	Chr08	872213	873854	-	3.94226	0.81964	4.83622	5.42053e-06	2.851e-05	3.73574	THAUMATIN-LIKE PROTEIN 1	Thaumatin family	0	0	NA	Thaumatin	No
Within-group	Bulk-R_Infected_vs_Control	MD09G1255200	Chr09	32675792	32676664	-	3.94224	-0.596184	6.86485	8.21379e-10	1.45847e-08	12.1296	Protein kinase superfamily protein	NA	0	0	NA	NA	Yes
Within-group	Bulk-R_Infected_vs_Control	MD04G1183600	Chr04	27484653	27486232	+	3.93824	0.523065	5.35176	6.56778e-07	4.55577e-06	5.74683	Protein of unknown function	NA	0	0	NA	NA	No
Within-group	Bulk-R_Infected_vs_Control	MD05G1106100	Chr05	21961561	21963753	-	3.93442	-2.02785	3.41609	0.00095447	0.00263653	-0.944852	beta glucosidase 17	NA	0	0	NA	NA	No
Within-group	Bulk-R_Infected_vs_Control	MD06G1072600	Chr06	18087728	18088855	+	3.9326	-2.65011	5.3334	7.09307e-07	4.8597e-06	5.72544	MATE efflux family protein	Belongs to the multi antimicrobial extrusion (MATE) (TC 2.A.66.1) family	0	0	NA	MatE	Yes
Within-group	Bulk-R_Infected_vs_Control	MD11G1093800	Chr11	7798418	7801056	-	3.92941	0.0734446	5.70926	1.43537e-07	1.22461e-06	7.20319	NAD(P)-binding Rossmann-fold superfamily protein	Tropinone reductase homolog At1g07440-like	0	0	ko00960,ko01100,ko01110,map00960,map01100,map01110	adh_short,adh_short_C2	Yes
Within-group	Bulk-R_Infected_vs_Control	MD06G1010100	Chr06	1183409	1185741	-	3.92911	0.108505	4.43103	2.63177e-05	0.000113162	2.2612	NA	NA	0	0	NA	NA	No
Within-group	Bulk-R_Infected_vs_Control	MD02G1026300	Chr02	1982069	1982989	+	3.92749	3.47225	3.82402	0.000241411	0.000792345	-0.130524	Raffinose synthase family protein	galactinol--sucrose galactosyltransferase	0	0	ko00052,map00052	Raffinose_syn	No
Within-group	Bulk-R_Infected_vs_Control	MD12G1040900	Chr12	4528126	4529346	+	3.9256	0.686283	4.83255	5.50047e-06	2.88507e-05	3.71055	plant U-box 23	RING-type E3 ubiquitin transferase	0	0	NA	U-box	Yes
Within-group	Bulk-R_Infected_vs_Control	MD09G1065500	Chr09	4462537	4464279	-	3.92305	-0.0618409	6.62933	2.41315e-09	3.63455e-08	11.1078	Cyclin-like family protein	Transcription initiation factor	0	0	ko03022,ko05169,ko05203,map03022,map05169,map05203	TFIIB,TF_Zn_Ribbon	No
Within-group	Bulk-R_Infected_vs_Control	MD05G1210700	Chr05	34204834	34206719	+	3.92294	-1.35056	5.39033	5.58589e-07	3.9587e-06	5.9438	glutathione S-transferase TAU 19	Glutathione S-transferase	0	0	ko00480,ko00980,ko00982,ko00983,ko01524,ko05200,ko05204,ko05225,ko05418,map00480,map00980,map00982,map00983,map01524,map05200,map05204,map05225,map05418	GST_C,GST_C_2,GST_N,GST_N_3	Yes
Within-group	Bulk-R_Infected_vs_Control	MD17G1102000	Chr17	8656942	8658500	-	3.9226	1.90165	6.33147	9.27332e-09	1.15035e-07	9.75609	RNAse II-like 1	Ribonuclease 3-like protein	0	0	NA	Ribonucleas_3_3,Ribonuclease_3,dsrm	Yes
Within-group	Bulk-R_Infected_vs_Control	MD07G1053700	Chr07	4957197	4958314	+	3.92204	-2.6737	5.31993	7.50406e-07	5.09275e-06	5.6741	dessication-induced 1VOC superfamily protein	NA	0	0	NA	NA	Yes
Within-group	Bulk-R_Infected_vs_Control	MD15G1201000	Chr15	15984335	15987053	-	3.92069	-1.67062	2.99781	0.00351325	0.00818586	-2.12304	myo-inositol oxygenase 4	Inositol oxygenase	0	0	ko00053,ko00562,map00053,map00562	MIOX	No
Within-group	Bulk-R_Infected_vs_Control	MD02G1047300	Chr02	3762689	3764077	-	3.91948	-0.0744779	5.69908	1.49977e-07	1.27183e-06	7.16453	S-locus lectin protein kinase family protein	G-type lectin S-receptor-like serine threonine-protein kinase	0	0	NA	B_lectin,DUF3403,PAN_2,Pkinase,Pkinase_Tyr,S_locus_glycop	Yes
Within-group	Bulk-R_Infected_vs_Control	MD17G1248100	Chr17	29694118	29696064	-	3.91849	2.02559	6.31626	9.92771e-09	1.21346e-07	9.68957	S-locus lectin protein kinase family protein	Protein kinase domain	0	0	NA	Pkinase_Tyr,WAK_assoc	No
Within-group	Bulk-R_Infected_vs_Control	MD07G1291400	Chr07	35214300	35217859	-	3.91571	-0.174651	3.6974	0.000373773	0.00116105	-0.167859	cyclic nucleotide gated channel 1	Cyclic nucleotide-gated ion channel 1-like	0	0	ko04626,map04626	Ion_trans	No
Within-group	Bulk-R_Infected_vs_Control	MD04G1180600	Chr04	27148706	27149754	+	3.91553	0.27351	5.34444	6.77258e-07	4.67515e-06	5.72862	Protein of unknown function (DUF567)	LURP-one-related 5-like	0	0	NA	LOR	No
Within-group	Bulk-R_Infected_vs_Control	MD05G1302200	Chr05	43467516	43470860	-	3.91393	-0.909275	5.3503	6.60814e-07	4.58278e-06	5.77977	ARM repeat superfamily protein	U-box domain-containing protein	0	0	NA	NA	No
Within-group	Bulk-R_Infected_vs_Control	MD01G1153600	Chr01	26193698	26196298	-	3.91244	1.99173	5.60248	2.27074e-07	1.822e-06	6.64819	2-oxoglutarate (2OG) and Fe(II)-dependent oxygenase superfamily protein	Belongs to the iron ascorbate-dependent oxidoreductase family	0	0	NA	2OG-FeII_Oxy,DIOX_N	Yes
Within-group	Bulk-R_Infected_vs_Control	MD05G1170000	Chr05	29970179	29972569	+	3.91119	0.753048	7.24664	1.40158e-10	3.25514e-09	13.8418	cytochrome P450	Cytochrome p450	0	0	ko00140,ko01100,ko04913,ko04917,ko04927,ko04934,map00140,map01100,map04913,map04917,map04927,map04934	p450	No
Within-group	Bulk-R_Infected_vs_Control	MD04G1060100	Chr04	7780597	7784502	+	3.90183	2.08237	4.76302	7.25071e-06	3.65894e-05	3.35278	Exostosin family protein	Glycosyltransferase	0	0	NA	Exostosin	Yes
Within-group	Bulk-R_Infected_vs_Control	MD16G1112900	Chr16	7897278	7900124	+	3.89736	-0.67796	4.04985	0.000108272	0.000392603	0.992605	AMP-dependent synthetase and ligase family protein	AMP-binding enzyme	0	0	NA	AMP-binding,AMP-binding_C	Yes
Within-group	Bulk-R_Infected_vs_Control	MD15G1065800	Chr15	4580979	4581437	-	3.8921	-1.44145	5.00089	2.79414e-06	1.59631e-05	4.43661	basic leucine-zipper 4	Ocs element-binding factor 1-like	0	0	NA	bZIP_1,bZIP_2	No
Within-group	Bulk-R_Infected_vs_Control	MD09G1162600	Chr09	13211209	13215313	-	3.88978	-1.51728	4.00035	0.000129382	0.000458814	0.860266	23 kDa jasmonate-induced protein	23 kDa jasmonate-induced protein-like	0	0	NA	NA	Yes
Within-group	Bulk-R_Infected_vs_Control	MD03G1222700	Chr03	30738599	30740479	-	3.88261	6.60026	5.98027	4.41082e-08	4.45655e-07	7.69827	NAC (No Apical Meristem) domain transcriptional regulator superfamily protein	NAC domain-containing protein	0	0	NA	NAM	Yes
Within-group	Bulk-R_Infected_vs_Control	MD14G1182700	Chr14	27552212	27553172	+	3.88044	0.412044	4.20433	6.15811e-05	0.000239571	1.43978	basic helix-loop-helix (bHLH) DNA-binding superfamily protein	helix loop helix domain	0	0	NA	HLH	Yes
Within-group	Bulk-R_Infected_vs_Control	MD07G1307400	Chr07	36348300	36351154	-	3.87959	-1.11179	3.08201	0.00272725	0.00655026	-1.93757	Laccase/Diphenol oxidase family protein	Lignin degradation and detoxification of lignin-derived products	0	0	NA	Cu-oxidase,Cu-oxidase_2,Cu-oxidase_3	Yes
Within-group	Bulk-R_Infected_vs_Control	MD10G1298500	Chr10	38562790	38564622	-	3.87336	3.91225	3.52248	0.000673289	0.0019445	-1.22353	Polyphenol oxidase	Polyphenol oxidase	0	0	ko00350,ko00950,ko01100,ko01110,map00350,map00950,map01100,map01110	PPO1_DWL,PPO1_KFDV,Tyrosinase	Yes
Within-group	Bulk-R_Infected_vs_Control	MD04G1009000	Chr04	1044443	1045735	-	3.87147	-2.16387	6.66534	2.04802e-09	3.18087e-08	11.2158	Integrase-type DNA-binding superfamily protein	ethylene-responsive transcription factor	0	0	NA	AP2	No
Within-group	Bulk-R_Infected_vs_Control	MD15G1344900	Chr15	40411131	40413060	+	3.86957	6.22702	7.94904	5.13934e-12	1.90893e-10	16.6513	NAC (No Apical Meristem) domain transcriptional regulator superfamily protein	NAC domain-containing protein	0	0	NA	NAM	Yes
Within-group	Bulk-R_Infected_vs_Control	MD17G1172800	Chr17	17830509	17830889	+	3.86935	-0.0370846	6.48729	4.59695e-09	6.33392e-08	10.4923	Protein of unknown function (DUF3511)	Domain of unknown function (DUF3511)	0	0	NA	DUF3511	Yes
Within-group	Bulk-R_Infected_vs_Control	MD17G1086200	Chr17	7071777	7075619	-	3.85835	3.38392	6.05022	3.24169e-08	3.41057e-07	8.37507	Major facilitator superfamily protein	Equilibrative nucleotide transporter 3-like	0	0	NA	Nucleoside_tran	Yes
Within-group	Bulk-R_Infected_vs_Control	MD01G1000200	Chr01	19860	23276	-	3.85592	2.38507	4.8819	4.51544e-06	2.42704e-05	3.73277	bidirectional amino acid transporter 1	Amino-acid permease	0	0	NA	AA_permease_2	Yes
Within-group	Bulk-R_Infected_vs_Control	MD15G1268500	Chr15	23231584	23234505	+	3.85477	0.52717	6.25594	1.30038e-08	1.54498e-07	9.48717	Major facilitator superfamily protein	Major Facilitator Superfamily	0	0	NA	MFS_1	Yes
Within-group	Bulk-R_Infected_vs_Control	MD17G1236200	Chr17	28503167	28504465	-	3.85373	-2.37537	4.44263	2.51808e-05	0.00010891	2.40169	Leucine-rich repeat (LRR) family protein	leucine-rich repeat extensin-like protein	0	0	NA	LRRNT_2,LRR_8	No
Within-group	Bulk-R_Infected_vs_Control	MD10G1097100	Chr10	15467853	15470440	-	3.85177	-1.51764	5.68855	1.56935e-07	1.32252e-06	7.14065	GroES-like zinc-binding alcohol dehydrogenase family protein	Cinnamyl alcohol dehydrogenase	0	0	ko00940,ko01100,ko01110,map00940,map01100,map01110	ADH_N,ADH_zinc_N	Yes
Within-group	Bulk-R_Infected_vs_Control	MD09G1049600	Chr09	3308506	3309818	-	3.84855	-1.49807	4.34958	3.58232e-05	0.000148921	2.0491	Protein of unknown function	NA	0	0	NA	NA	No
Within-group	Bulk-R_Infected_vs_Control	MD05G1267600	Chr05	40281483	40283117	+	3.84708	3.01991	5.25652	9.77508e-07	6.39387e-06	5.10428	FAD-binding Berberine family protein	Belongs to the oxygen-dependent FAD-linked oxidoreductase family	0	0	NA	BBE,FAD_binding_4	Yes
Within-group	Bulk-R_Infected_vs_Control	MD03G1046700	Chr03	3755086	3759953	+	3.8466	-0.240982	5.03933	2.38982e-06	1.39325e-05	4.54238	cytochrome P450	Cytochrome p450	0	0	NA	p450	Yes
Within-group	Bulk-R_Infected_vs_Control	MD00G1070500	Chr00	13717029	13719220	-	3.84503	-2.53731	4.03652	0.000113605	0.000409053	1.01367	Pectin lyase-like superfamily protein	Polygalacturonase-like	0	0	ko00040,ko01100,map00040,map01100	Glyco_hydro_28	Yes
Within-group	Bulk-R_Infected_vs_Control	MD05G1198700	Chr05	32640682	32641443	-	3.84476	0.343164	5.27799	8.93961e-07	5.92531e-06	5.43472	ethylene response factor 1	Ethylene-responsive transcription factor 1B-like	0	0	ko04016,ko04075,map04016,map04075	AP2	Yes
Within-group	Bulk-R_Infected_vs_Control	MD14G1174100	Chr14	26769173	26769694	+	3.84439	-2.16634	5.99254	4.17929e-08	4.25183e-07	8.37498	NA	NA	0	0	NA	NA	Yes
Within-group	Bulk-R_Infected_vs_Control	MD07G1020400	Chr07	1751598	1753368	-	3.83848	5.29416	9.36912	5.77317e-15	6.86668e-13	23.4651	NAD(P)-binding Rossmann-fold superfamily protein	NA	0	0	NA	NA	Yes
Within-group	Bulk-R_Infected_vs_Control	MD16G1040800	Chr16	2896058	2897480	-	3.83638	2.91828	4.63103	1.21786e-05	5.7569e-05	2.68624	myb domain protein 62	Transcription factor	0	0	NA	Myb_DNA-binding	Yes
Within-group	Bulk-R_Infected_vs_Control	MD05G1287200	Chr05	41962613	41963248	-	3.8299	-2.80032	4.49357	2.07242e-05	9.18327e-05	2.59255	AGAMOUS-like 62	Agamous-like MADS-box protein	0	0	ko04011,ko04111,map04011,map04111	SRF-TF	Yes
Within-group	Bulk-R_Infected_vs_Control	MD07G1068400	Chr07	6472215	6472721	+	3.82938	0.781438	3.83108	0.000235533	0.000775097	0.18073	Protein of unknown function	NA	0	0	NA	NA	No
Within-group	Bulk-R_Infected_vs_Control	MD01G1174400	Chr01	27556734	27559815	+	3.82932	4.43605	5.05028	2.2855e-06	1.33732e-05	4.18154	glutamate dehydrogenase 2	Belongs to the Glu Leu Phe Val dehydrogenases family	0	0	ko00220,ko00250,ko00471,ko00910,ko01100,ko01200,ko04217,ko04964,map00220,map00250,map00471,map00910,map01100,map01200,map04217,map04964	ELFV_dehydrog,ELFV_dehydrog_N	Yes
Within-group	Bulk-R_Infected_vs_Control	MD12G1148500	Chr12	22861261	22862479	-	3.82872	-0.810488	4.98174	3.01975e-06	1.70975e-05	4.35148	NAD(P)-binding Rossmann-fold superfamily protein	Tropinone reductase homolog	0	0	ko00960,ko01100,ko01110,map00960,map01100,map01110	adh_short,adh_short_C2	Yes
Within-group	Bulk-R_Infected_vs_Control	MD15G1037300	Chr15	2592053	2593919	+	3.8286	3.61333	5.63959	1.93698e-07	1.58406e-06	6.62025	Glycosyl hydrolase family protein with chitinase insertion domain	Belongs to the glycosyl hydrolase 18 family	0	0	ko00520,ko01100,map00520,map01100	Glyco_hydro_18	No
Within-group	Bulk-R_Infected_vs_Control	MD11G1231000	Chr11	33593917	33597372	-	3.82373	0.606007	8.16859	1.8101e-12	7.82625e-11	18.028	S-locus lectin protein kinase family protein	G-type lectin S-receptor-like serine threonine-protein kinase	0	0	NA	B_lectin,DUF3403,PAN_2,Pkinase_Tyr,S_locus_glycop	Yes
Within-group	Bulk-R_Infected_vs_Control	MD09G1069800	Chr09	4779404	4782477	-	3.82282	1.27313	6.91031	6.663e-10	1.22617e-08	12.3399	Ras-related small GTP-binding family protein	Septum-promoting GTP-binding protein	0	0	NA	Ras,Roc	No
Within-group	Bulk-R_Infected_vs_Control	MD02G1054900	Chr02	4420254	4422008	+	3.82079	2.72517	3.59042	0.000536862	0.00159388	-0.802655	2-oxoglutarate (2OG) and Fe(II)-dependent oxygenase superfamily protein	Belongs to the iron ascorbate-dependent oxidoreductase family	0	0	NA	2OG-FeII_Oxy,DIOX_N	Yes
Within-group	Bulk-R_Infected_vs_Control	MD02G1198400	Chr02	19480577	19481593	-	3.8134	4.26745	6.56201	3.27695e-09	4.72442e-08	10.4957	alpha/beta-Hydrolases superfamily protein	carboxylesterase 8	0	0	NA	Abhydrolase_3	Yes
Within-group	Bulk-R_Infected_vs_Control	MD11G1203300	Chr11	29538662	29544521	+	3.8133	5.74174	11.6651	1.04421e-19	8.23959e-17	34.2743	multidrug resistance-associated protein 3	ABC transporter C family member	0	0	ko01523,ko01524,ko02010,ko04976,map01523,map01524,map02010,map04976	ABC_membrane,ABC_tran	Yes
Within-group	Bulk-R_Infected_vs_Control	MD17G1233000	Chr17	28134571	28137185	+	3.81326	-2.73206	3.48143	0.000770965	0.00219124	-0.724086	late embryogenesis abundant domain-containing protein / LEA domain-containing protein	Seed biotin-containing protein	0	0	NA	NA	No
Within-group	Bulk-R_Infected_vs_Control	MD13G1231500	Chr13	22989592	22991566	-	3.81239	3.12303	4.18936	6.50759e-05	0.000251353	1.05323	alternative oxidase 2	Belongs to the alternative oxidase family	0	0	NA	AOX	Yes
Within-group	Bulk-R_Infected_vs_Control	MD00G1171800	Chr00	39480002	39485023	-	3.81207	4.86174	5.65947	1.77853e-07	1.47422e-06	6.51566	trehalose phosphate synthase	alpha,alpha-trehalose-phosphate synthase UDP-forming	0	0	ko00500,ko01100,map00500,map01100	Glyco_transf_20,Trehalose_PPase	No
Within-group	Bulk-R_Infected_vs_Control	MD15G1402700	Chr15	50364092	50367777	-	3.8091	4.61977	5.05467	2.24498e-06	1.31551e-05	4.07748	12-oxophytodienoate reductase 2	12-oxophytodienoate reductase	0	0	ko00592,ko01100,ko01110,map00592,map01100,map01110	Oxidored_FMN	Yes
Within-group	Bulk-R_Infected_vs_Control	MD15G1233700	Chr15	19111128	19112461	+	3.8074	2.81001	4.91955	3.88164e-06	2.12701e-05	3.84912	NA	Adipocyte plasma membrane-associated	0	0	NA	Str_synth	Yes
Within-group	Bulk-R_Infected_vs_Control	MD05G1320500	Chr05	44778751	44780508	+	3.80737	0.204714	3.31391	0.00132583	0.00350635	-1.39364	Polyphenol oxidase	Polyphenol oxidase	0	0	ko00350,ko00950,ko01100,ko01110,map00350,map00950,map01100,map01110	PPO1_DWL,PPO1_KFDV,Tyrosinase	Yes
Within-group	Bulk-R_Infected_vs_Control	MD04G1135900	Chr04	22290341	22290601	+	3.8053	-1.53159	5.88443	6.71159e-08	6.36195e-07	7.94359	Protein of unknown function	NA	0	0	NA	NA	No
Within-group	Bulk-R_Infected_vs_Control	MD13G1063300	Chr13	4383360	4385626	-	3.80472	5.6852	8.40063	5.98542e-13	3.1439e-11	18.8046	plasmodesmata callose-binding protein 3	NA	0	0	NA	NA	Yes
Within-group	Bulk-R_Infected_vs_Control	MD12G1228300	Chr12	30366708	30371578	-	3.80413	-1.26706	3.67924	0.000397653	0.00122511	-0.172516	Calcium-dependent phospholipid-binding Copine family protein	BONZAI 3-like	0	0	NA	C2,Copine	No
Within-group	Bulk-R_Infected_vs_Control	MD12G1008300	Chr12	895519	896558	-	3.80271	1.8732	5.12467	1.68561e-06	1.02614e-05	4.7261	NA	NA	0	0	NA	NA	No
Within-group	Bulk-R_Infected_vs_Control	MD09G1018900	Chr09	1160050	1162926	-	3.80093	-1.31548	3.66429	0.000418399	0.00128037	-0.220192	PQ-loop repeat family protein / transmembrane family protein	Cystinosin homolog	0	0	ko04142,map04142	PQ-loop	No
Within-group	Bulk-R_Infected_vs_Control	MD07G1007600	Chr07	698400	703792	+	3.79927	4.71008	6.80758	1.06852e-09	1.81273e-08	11.5629	UDP-glucosyl transferase 73B3	Belongs to the UDP-glycosyltransferase family	0	0	ko00906,ko01100,ko01110,map00906,map01100,map01110	UDPGT	Yes
Within-group	Bulk-R_Infected_vs_Control	MD06G1237600	Chr06	36877463	36882039	+	3.79798	4.25598	6.8328	9.51743e-10	1.63868e-08	11.7254	Nucleotide-diphospho-sugar transferase family protein	At4g15970-like	0	0	NA	Nucleotid_trans	Yes
Within-group	Bulk-R_Infected_vs_Control	MD15G1284700	Chr15	25858508	25862475	-	3.79728	2.05565	5.6697	1.70197e-07	1.41829e-06	6.96196	alpha/beta-Hydrolases superfamily protein	triglyceride lipase activity	0	0	NA	Lipase_3	Yes
Within-group	Bulk-R_Infected_vs_Control	MD09G1255400	Chr09	32686271	32688498	-	3.79716	-0.397014	3.18655	0.00197871	0.00496664	-1.683	Class I glutamine amidotransferase-like superfamily protein	Peptidase C26	0	0	NA	Peptidase_C26	No
Within-group	Bulk-R_Infected_vs_Control	MD14G1197100	Chr14	28716946	28718351	-	3.79651	-2.83639	5.77876	1.06285e-07	9.41291e-07	7.48799	BANQUO 3	transcription factor	0	0	NA	HLH	Yes
Within-group	Bulk-R_Infected_vs_Control	MD06G1022000	Chr06	2737099	2738574	-	3.7941	0.56514	5.21328	1.16958e-06	7.45582e-06	5.17673	UDP-Glycosyltransferase superfamily protein	Glycosyltransferase Family 4	0	0	NA	Glyco_transf_4,Glycos_transf_1	Yes
Within-group	Bulk-R_Infected_vs_Control	MD06G1131200	Chr06	27474313	27474561	-	3.79409	-0.8369	5.94013	5.26033e-08	5.16016e-07	8.17452	cytochrome P450	NA	0	0	NA	NA	Yes
Within-group	Bulk-R_Infected_vs_Control	MD12G1148800	Chr12	22895566	22896850	+	3.78978	-1.95885	4.90768	4.07156e-06	2.21905e-05	4.09534	NAD(P)-binding Rossmann-fold superfamily protein	Tropinone reductase homolog	0	0	ko00960,ko01100,ko01110,map00960,map01100,map01110	adh_short,adh_short_C2	No
Within-group	Bulk-R_Infected_vs_Control	MD15G1109500	Chr15	7653964	7654752	-	3.78921	-2.69939	4.77503	6.91399e-06	3.50433e-05	3.6062	FASCICLIN-like arabinogalactan protein 14 precursor	Fasciclin-like arabinogalactan protein	0	0	NA	Fasciclin	No
Within-group	Bulk-R_Infected_vs_Control	MD02G1025500	Chr02	1927553	1930057	+	3.78863	4.98304	4.84728	5.18635e-06	2.74434e-05	3.24838	Raffinose synthase family protein	galactinol--sucrose galactosyltransferase	0	0	ko00052,map00052	Raffinose_syn	No
Within-group	Bulk-R_Infected_vs_Control	MD13G1004600	Chr13	280748	284176	-	3.7881	-2.25782	5.75931	1.15624e-07	1.01428e-06	7.42148	wall-associated kinase 2	Wall-associated receptor kinase	0	0	NA	EGF_CA,GUB_WAK_bind,Pkinase,Pkinase_Tyr,WAK	Yes
Within-group	Bulk-R_Infected_vs_Control	MD01G1152900	Chr01	26123173	26126501	+	3.78623	2.2231	6.03475	3.47049e-08	3.61711e-07	8.47033	Phosphoinositide-specific phospholipase C family protein	Phosphoinositide phospholipase C	0	0	ko00562,ko01100,ko04020,ko04070,ko04919,ko04933,map00562,map01100,map04020,map04070,map04919,map04933	C2,EF-hand_like,PI-PLC-X,PI-PLC-Y	No
Within-group	Bulk-R_Infected_vs_Control	MD10G1275500	Chr10	36675500	36675790	-	3.78498	-0.375033	5.43501	4.62711e-07	3.36094e-06	6.10236	Protein of unknown function	NA	0	0	NA	NA	Yes
Within-group	Bulk-R_Infected_vs_Control	MD02G1164900	Chr02	14087651	14088683	+	3.77911	-1.33127	3.28641	0.0014468	0.00378666	-1.3718	NA	NA	0	0	NA	NA	Yes
Within-group	Bulk-R_Infected_vs_Control	MD14G1028700	Chr14	2561176	2563221	+	3.77762	1.49477	4.47216	2.24959e-05	9.85494e-05	2.30206	2-oxoglutarate (2OG) and Fe(II)-dependent oxygenase superfamily protein	1-aminocyclopropane-1-carboxylate oxidase homolog	0	0	NA	2OG-FeII_Oxy,DIOX_N	Yes
Within-group	Bulk-R_Infected_vs_Control	MD16G1178800	Chr16	15311733	15312308	+	3.77444	-0.346475	2.91782	0.00444924	0.0100694	-2.47167	DUF679 domain membrane protein 2	Protein of unknown function (DUF679)	0	0	NA	DUF679	No
Within-group	Bulk-R_Infected_vs_Control	MD17G1042800	Chr17	3138371	3145858	-	3.77094	1.83759	3.28718	0.00144327	0.00377894	-1.58343	ABC transporter family protein	ABC transporter B family member	0	0	ko02010,ko04976,ko05206,ko05226,map02010,map04976,map05206,map05226	ABC_membrane,ABC_tran	Yes
Within-group	Bulk-R_Infected_vs_Control	MD11G1171900	Chr11	18979643	18980739	-	3.76023	0.64956	4.66382	1.0714e-05	5.15496e-05	3.06216	NAD(P)-binding Rossmann-fold superfamily protein	Secoisolariciresinol dehydrogenase-like	0	0	NA	adh_short_C2	No
Within-group	Bulk-R_Infected_vs_Control	MD04G1237600	Chr04	31588379	31593406	-	3.76014	1.17365	8.16728	1.82137e-12	7.82625e-11	18.0369	F-box family protein	f-box protein	0	0	NA	F-box,PP2	Yes
Within-group	Bulk-R_Infected_vs_Control	MD02G1233100	Chr02	27935732	27939097	-	3.75862	-1.88543	5.0088	2.70587e-06	1.55323e-05	4.4741	glutamate receptor 1.3	Glutamate receptor	0	0	NA	ANF_receptor,Lig_chan,Lig_chan-Glu_bd,SBP_bac_3	Yes
Within-group	Bulk-R_Infected_vs_Control	MD11G1110100	Chr11	9728932	9730789	+	3.75463	1.06631	6.48299	4.68716e-09	6.43083e-08	10.4631	ENTH/VHS family protein	ENTH domain	0	0	ko04144,map04144	ENTH	Yes
Within-group	Bulk-R_Infected_vs_Control	MD05G1139100	Chr05	26962020	26963681	-	3.75125	-1.27852	5.73201	1.30113e-07	1.12311e-06	7.3183	Leucine-rich receptor-like protein kinase family protein	Receptor protein kinase	0	0	NA	LRRNT_2,LRR_1,LRR_4,LRR_6,LRR_8,Pkinase,Pkinase_Tyr	No
Within-group	Bulk-R_Infected_vs_Control	MD17G1279900	Chr17	34025362	34030887	-	3.74972	-1.46695	5.40677	5.21226e-07	3.72327e-06	6.01384	HCO3 -transporter family	Boron transporter	0	0	NA	HCO3_cotransp	No
Within-group	Bulk-R_Infected_vs_Control	MD07G1060300	Chr07	5598028	5598480	+	3.74945	-2.1238	3.8561	0.000215794	0.000716772	0.407125	Stigma-specific Stig1 family protein	Stigma-specific protein, Stig1	0	0	NA	Stig1	Yes
Within-group	Bulk-R_Infected_vs_Control	MD09G1149300	Chr09	11730939	11732612	+	3.7488	3.36186	5.56413	2.67498e-07	2.09949e-06	6.30736	Eukaryotic aspartyl protease family protein	Belongs to the peptidase A1 family	0	0	NA	Ribosomal_L18A,TAXi_C,TAXi_N	Yes
Within-group	Bulk-R_Infected_vs_Control	MD01G1090000	Chr01	20390482	20395828	-	3.74754	-0.751917	4.15969	7.25797e-05	0.000276833	1.3497	2-oxoglutarate (2OG) and Fe(II)-dependent oxygenase superfamily protein	Belongs to the iron ascorbate-dependent oxidoreductase family	0	0	NA	2OG-FeII_Oxy,DIOX_N	Yes
Within-group	Bulk-R_Infected_vs_Control	MD13G1213100	Chr13	19977428	19978117	+	3.73799	3.85835	6.28287	1.15288e-08	1.38551e-07	9.34464	ethylene response factor 1	ethylene-responsive transcription factor	0	0	ko04016,ko04075,map04016,map04075	AP2	Yes
Within-group	Bulk-R_Infected_vs_Control	MD13G1039900	Chr13	2720182	2721578	-	3.73644	-0.297346	3.72497	0.000340102	0.00107002	-0.112472	myb domain protein 62	Transcription factor	0	0	NA	Myb_DNA-binding	Yes
Within-group	Bulk-R_Infected_vs_Control	MD05G1293800	Chr05	42645518	42650003	-	3.73456	4.18937	6.76343	1.3082e-09	2.15384e-08	11.4552	Integrin-linked protein kinase family	Serine threonine-protein kinase	0	0	NA	Ank_2,Ank_5,Pkinase_Tyr	No
Within-group	Bulk-R_Infected_vs_Control	MD05G1306400	Chr05	43849463	43852695	-	3.72541	-1.0427	4.17149	6.95016e-05	0.00026638	1.41116	glutamate receptor 2.7	Glutamate-gated receptor that probably acts as non- selective cation channel	0	0	NA	ANF_receptor,Lig_chan,SBP_bac_3	No
Within-group	Bulk-R_Infected_vs_Control	MD02G1236000	Chr02	28232819	28234618	-	3.72101	6.08401	7.23874	1.45412e-10	3.35786e-09	13.35	glutathione S-transferase TAU 8	Belongs to the GST superfamily	0	0	ko00480,ko00980,ko00982,ko00983,ko01524,ko05200,ko05204,ko05225,ko05418,map00480,map00980,map00982,map00983,map01524,map05200,map05204,map05225,map05418	GST_C,GST_N	Yes
Within-group	Bulk-R_Infected_vs_Control	MD16G1288000	Chr16	41299160	41300635	+	3.71843	-0.877634	5.00705	2.72517e-06	1.56293e-05	4.4371	UDP-Glycosyltransferase superfamily protein	Glycosyltransferase Family 4	0	0	NA	Glyco_transf_4,Glycos_transf_1	Yes
Within-group	Bulk-R_Infected_vs_Control	MD09G1053700	Chr09	3559688	3561425	+	3.7178	1.12551	4.91805	3.9052e-06	2.13905e-05	3.9956	NAC domain containing protein 100	NAC domain-containing protein	0	0	NA	NAM	Yes
Within-group	Bulk-R_Infected_vs_Control	MD12G1023900	Chr12	2414575	2416961	-	3.71599	-2.29128	5.50595	3.4266e-07	2.60468e-06	6.40721	PEBP (phosphatidylethanolamine-binding protein) family protein	Protein TERMINAL FLOWER 1-like	0	0	NA	PBP	No
Within-group	Bulk-R_Infected_vs_Control	MD17G1250000	Chr17	29942908	29944341	-	3.71417	3.6534	3.34662	0.00119429	0.00320059	-1.80082	Pathogenesis-related thaumatin superfamily protein	Thaumatin-like protein	0	0	NA	Thaumatin	Yes
Within-group	Bulk-R_Infected_vs_Control	MD17G1264900	Chr17	32540122	32546354	+	3.71413	4.53122	6.12636	2.3147e-08	2.54538e-07	8.57252	aspartate aminotransferase 1	Aspartate aminotransferase	0	0	ko00220,ko00250,ko00270,ko00330,ko00350,ko00360,ko00400,ko00710,ko00950,ko00960,ko01100,ko01110,ko01120,ko01130,ko01200,ko01210,ko01230,ko04975,map00220,map00250,map00270,map00330,map00350,map00360,map00400,map00710,map00950,map00960,map01100,map01110,map01120,map01130,map01200,map01210,map01230,map04975	Aminotran_1_2	Yes
Within-group	Bulk-R_Infected_vs_Control	MD13G1273200	Chr13	36968490	36974799	-	3.71403	3.12224	7.57109	3.06585e-11	8.72351e-10	15.236	Fatty acid hydroxylase superfamily	Belongs to the sterol desaturase family	0	0	NA	FA_hydroxylase,Wax2_C	Yes
Within-group	Bulk-R_Infected_vs_Control	MD13G1103000	Chr13	7357722	7360289	-	3.71126	4.32157	7.71209	1.57738e-11	4.9933e-10	15.7407	mitogen-activated protein kinase phosphatase 1	Protein-tyrosine-phosphatase MKP1-like	0	0	ko04010,ko04726,ko05418,map04010,map04726,map05418	DSPc,Gelsolin	Yes
Within-group	Bulk-R_Infected_vs_Control	MD15G1085800	Chr15	5918936	5921920	-	3.71122	1.26083	4.0485	0.0001088	0.000394298	0.850226	phospholipase A 2A	Lipolytic acyl hydrolase (LAH)	0	0	NA	Patatin	No
Within-group	Bulk-R_Infected_vs_Control	MD16G1110600	Chr16	7781960	7783273	+	3.7103	0.0706687	7.0152	4.10582e-10	8.08961e-09	12.8026	HXXXD-type acyl-transferase family protein	Transferase family	0	0	ko00940,ko00941,ko00945,ko01100,ko01110,map00940,map00941,map00945,map01100,map01110	Transferase	Yes
Within-group	Bulk-R_Infected_vs_Control	MD07G1065000	Chr07	6158514	6161294	-	3.71002	0.384387	4.74116	7.90509e-06	3.95401e-05	3.37944	alpha/beta-Hydrolases superfamily protein	Alpha/beta hydrolase family	0	0	NA	Abhydrolase_1,Abhydrolase_6,Hydrolase_4	No
Within-group	Bulk-R_Infected_vs_Control	MD16G1010100	Chr16	783015	786732	-	3.70632	0.286026	3.31576	0.00131805	0.00348778	-1.38969	Homeodomain-like superfamily protein	Myb family transcription factor	0	0	NA	Myb_DNA-binding	No
Within-group	Bulk-R_Infected_vs_Control	MD05G1330700	Chr05	45492427	45494008	+	3.70547	-0.569361	5.7784	1.0645e-07	9.42493e-07	7.5052	S-locus lectin protein kinase family protein	NA	0	0	NA	NA	No
Within-group	Bulk-R_Infected_vs_Control	MD05G1080900	Chr05	16881709	16882533	-	-3.34477	-1.63001	-2.66	0.00924813	0.0190014	-3.10207	redox responsive transcription factor 1	Transcription factor	1	0	NA	AP2	No
Within-group	Bulk-R_Infected_vs_Control	MD07G1291000	Chr07	35175364	35177760	+	3.70423	2.28724	3.19755	0.00191224	0.00482226	-1.99336	highly ABA-induced PP2C gene 2	phosphatase 2c	0	0	ko04016,ko04075,ko04931,map04016,map04075,map04931	PP2C	Yes
Within-group	Bulk-R_Infected_vs_Control	MD14G1087100	Chr14	10817820	10818561	+	3.70286	3.69928	6.68612	1.86278e-09	2.93258e-08	11.143	NA	NA	0	0	NA	NA	Yes
Within-group	Bulk-R_Infected_vs_Control	MD02G1082300	Chr02	6440363	6443138	+	3.69748	3.34415	3.90901	0.00017911	0.000609377	0.0734362	calmodulin-binding family protein	Short calmodulin-binding motif containing conserved Ile and Gln residues.	0	0	NA	NA	Yes
Within-group	Bulk-R_Infected_vs_Control	MD04G1048000	Chr04	5630350	5631818	+	3.69708	4.79904	6.35492	8.34693e-09	1.05402e-07	9.46645	homolog of carrot EP3-3 chitinase	Endochitinase	0	0	ko00520,ko01100,map00520,map01100	Chitin_bind_1,Glyco_hydro_19	Yes
Within-group	Bulk-R_Infected_vs_Control	MD10G1320500	Chr10	40222086	40222496	-	3.69197	-2.55134	6.36235	8.07295e-09	1.02422e-07	9.90451	Expression of the gene is downregulated in the presence of paraquat	NA	0	0	NA	NA	Yes
Within-group	Bulk-R_Infected_vs_Control	MD07G1248300	Chr07	31759572	31760018	-	3.69186	-1.85554	5.53565	3.02023e-07	2.34317e-06	6.52662	oleosin 1	Oleosin 1-like	0	0	NA	Oleosin	No
Within-group	Bulk-R_Infected_vs_Control	MD04G1018100	Chr04	2085155	2085493	-	3.68833	3.48627	8.04235	3.29986e-12	1.29875e-10	17.3662	ralf-like 32	NA	0	0	NA	NA	No
Within-group	Bulk-R_Infected_vs_Control	MD06G1079800	Chr06	19564125	19565794	-	3.68464	-1.73092	4.4975	2.04142e-05	9.06698e-05	2.58577	actin depolymerizing factor 7	Actin-depolymerizing factor 7-like	0	0	ko04360,ko04666,ko04810,ko05133,map04360,map04666,map04810,map05133	Cofilin_ADF	Yes
Within-group	Bulk-R_Infected_vs_Control	MD17G1248300	Chr17	29707870	29708742	-	3.68442	2.19685	7.44747	5.4798e-11	1.44484e-09	14.727	Protein kinase superfamily protein	NA	0	0	NA	NA	Yes
Within-group	Bulk-R_Infected_vs_Control	MD00G1136300	Chr00	29541189	29542229	-	3.68281	4.52038	5.83776	8.22573e-08	7.56879e-07	7.32627	glutathione S-transferase tau 7	Glutathione S-transferase, N-terminal domain	0	0	ko00480,ko00980,ko00982,ko00983,ko01524,ko05200,ko05204,ko05225,ko05418,map00480,map00980,map00982,map00983,map01524,map05200,map05204,map05225,map05418	GST_C,GST_N	Yes
Within-group	Bulk-R_Infected_vs_Control	MD15G1014200	Chr15	805247	805606	+	3.6804	1.47832	5.8075	9.38221e-08	8.49282e-07	7.57419	SAUR-like auxin-responsive protein family	NA	0	0	NA	NA	No
Within-group	Bulk-R_Infected_vs_Control	MD07G1248400	Chr07	31772491	31775095	-	3.68	2.20209	4.15511	7.38089e-05	0.000280793	1.12243	NA	ethylene-responsive transcription factor	0	0	ko04075,ko04626,map04075,map04626	AP2	Yes
Within-group	Bulk-R_Infected_vs_Control	MD02G1294000	Chr02	34917485	34918800	+	3.67845	-1.85411	3.1765	0.00204131	0.00510519	-1.63343	NA	NA	0	0	NA	NA	No
Within-group	Bulk-R_Infected_vs_Control	MD09G1174600	Chr09	14810392	14813413	+	3.67738	-1.93851	5.06511	2.15128e-06	1.26704e-05	4.68909	GDSL-motif lipase 3	Belongs to the 'GDSL' lipolytic enzyme family	0	0	NA	Lipase_GDSL	Yes
Within-group	Bulk-R_Infected_vs_Control	MD05G1164900	Chr05	29348603	29350141	-	3.67679	1.82617	5.78357	1.04092e-07	9.25668e-07	7.42757	AGC (cAMP-dependent	Serine threonine-protein kinase	0	0	ko04016,map04016	Pkinase	Yes
Within-group	Bulk-R_Infected_vs_Control	MD07G1279600	Chr07	34385229	34387660	+	3.67356	-0.44476	4.7224	8.51235e-06	4.21862e-05	3.35456	NA	PAM68-like	0	0	NA	DUF3464	No
Within-group	Bulk-R_Infected_vs_Control	MD15G1277200	Chr15	24383115	24386079	+	3.67099	3.71991	4.37303	3.27915e-05	0.000137704	1.55444	Disease resistance protein (CC-NBS-LRR class) family	disease resistance	0	0	ko04014,map04014	NB-ARC,RPW8	Yes
Within-group	Bulk-R_Infected_vs_Control	MD14G1227500	Chr14	30870058	30871496	+	3.66024	4.96089	8.18591	1.66679e-12	7.41733e-11	17.8636	myb domain protein 62	transcription factor	0	0	NA	Myb_DNA-binding	Yes
Within-group	Bulk-R_Infected_vs_Control	MD05G1129900	Chr05	25422385	25426014	-	3.65897	1.81708	4.03101	0.000115884	0.000416425	0.725631	Transmembrane amino acid transporter family protein	Lysine histidine transporter-like	0	0	NA	Aa_trans	No
Within-group	Bulk-R_Infected_vs_Control	MD14G1141400	Chr14	23207987	23209426	+	3.65792	-0.748739	6.14108	2.16839e-08	2.41154e-07	9.01457	AP2/B3-like transcriptional factor family protein	B3 DNA binding domain	0	0	NA	B3	Yes
Within-group	Bulk-R_Infected_vs_Control	MD10G1049900	Chr10	6609152	6612900	+	3.65644	1.96195	5.31148	7.77382e-07	5.24733e-06	5.40829	ABC-2 type transporter family protein	ABC transporter G family member	0	0	NA	ABC2_membrane,ABC_tran	No
Within-group	Bulk-R_Infected_vs_Control	MD01G1225700	Chr01	31637230	31642235	-	3.65623	4.12614	7.9235	5.80099e-12	2.11344e-10	16.7492	P-loop containing nucleoside triphosphate hydrolases superfamily protein	mitochondrial chaperone	0	0	NA	AAA,AAA_assoc	Yes
Within-group	Bulk-R_Infected_vs_Control	MD07G1277000	Chr07	34232019	34236081	-	3.65563	-3.08697	5.1657	1.42373e-06	8.86631e-06	5.07693	detoxifying efflux carrier 35	Protein TRANSPARENT TESTA 12-like	0	0	NA	MatE	No
Within-group	Bulk-R_Infected_vs_Control	MD13G1137700	Chr13	10603700	10605007	+	3.65282	4.40212	7.21827	1.59965e-10	3.6522e-09	13.4621	Thioesterase superfamily protein	Thioesterase superfamily	0	0	NA	4HBT	Yes
Within-group	Bulk-R_Infected_vs_Control	MD15G1411200	Chr15	51057132	51058718	+	3.65138	3.38897	4.85775	4.97381e-06	2.64529e-05	3.50935	myb domain protein 3	transcription regulator recruiting activity	0	0	NA	Myb_DNA-binding	No
Within-group	Bulk-R_Infected_vs_Control	MD17G1117600	Chr17	10186221	10189124	-	3.65119	-2.42319	4.91506	3.95245e-06	2.16033e-05	4.12607	nudix hydrolase homolog 2	Nudix hydrolase	0	0	NA	NUDIX	Yes
Within-group	Bulk-R_Infected_vs_Control	MD12G1246700	Chr12	31689446	31694912	+	3.65047	6.89573	7.19875	1.75183e-10	3.94949e-09	13.1227	threonine aldolase 1	low-specificity L-threonine aldolase 1	0	0	ko00260,ko01100,ko01110,ko01120,ko01130,ko01230,map00260,map01100,map01110,map01120,map01130,map01230	Beta_elim_lyase	Yes
Within-group	Bulk-R_Infected_vs_Control	MD13G1149100	Chr13	11724998	11726427	+	3.64798	-2.63681	5.28488	8.68641e-07	5.78355e-06	5.53744	Protein of unknown function	Desiccation-related protein PCC13-62-like	0	0	NA	Ferritin_2	Yes
Within-group	Bulk-R_Infected_vs_Control	MD05G1112000	Chr05	22908492	22911688	-	3.64794	2.98846	5.27664	8.9899e-07	5.95132e-06	5.21024	FAD/NAD(P)-binding oxidoreductase family protein	Squalene monooxygenase-like	0	0	ko00100,ko00909,ko01100,ko01110,ko01130,map00100,map00909,map01100,map01110,map01130	SE	Yes
Within-group	Bulk-R_Infected_vs_Control	MD04G1002500	Chr04	349190	351606	-	3.64595	7.56174	6.37438	7.64823e-09	9.78006e-08	9.39491	cytochrome P450	Cytochrome p450	0	0	NA	p450	Yes
Within-group	Bulk-R_Infected_vs_Control	MD01G1142600	Chr01	25240038	25241782	+	3.64314	1.1914	7.65882	2.02816e-11	6.14524e-10	15.708	UDP-Glycosyltransferase superfamily protein	UDP-glycosyltransferase 76F1-like	0	0	ko00140,ko00380,ko00402,ko00830,ko00908,ko00980,ko01100,ko01110,ko04913,ko05204,map00140,map00380,map00402,map00830,map00908,map00980,map01100,map01110,map04913,map05204	UDPGT	Yes
Within-group	Bulk-R_Infected_vs_Control	MD05G1328500	Chr05	45385089	45387203	+	3.63638	-0.553355	4.0854	9.51888e-05	0.000350586	1.11629	S-locus lectin protein kinase family protein	serine threonine-protein kinase	0	0	NA	B_lectin,DUF3403,PAN_2,Pkinase,Pkinase_Tyr,S_locus_glycop	Yes
Within-group	Bulk-R_Infected_vs_Control	MD07G1211000	Chr07	28973041	28974972	+	3.63631	0.769263	8.84029	7.29936e-14	5.32008e-12	21.1082	NA	Protein of unknown function (DUF620)	0	0	NA	DUF620	Yes
Within-group	Bulk-R_Infected_vs_Control	MD01G1098700	Chr01	21244933	21245895	-	3.63531	-2.216	4.82751	5.61226e-06	2.93514e-05	3.79818	matrix metalloproteinase	Metalloendoproteinase 1-like	0	0	NA	PG_binding_1,Peptidase_M10	Yes
Within-group	Bulk-R_Infected_vs_Control	MD04G1091900	Chr04	16381329	16383226	-	3.62627	1.77722	6.04222	3.35812e-08	3.51365e-07	8.52655	methionine adenosyltransferase 3	Catalyzes the formation of S-adenosylmethionine from methionine and ATP	0	0	ko00270,ko01100,ko01110,ko01230,map00270,map01100,map01110,map01230	S-AdoMet_synt_C,S-AdoMet_synt_M,S-AdoMet_synt_N	Yes
Within-group	Bulk-R_Infected_vs_Control	MD03G1034900	Chr03	2803953	2809598	+	3.62565	6.3938	9.19567	1.32719e-14	1.34179e-12	22.5457	farnesyl diphosphate synthase 1	Belongs to the FPP GGPP synthase family	0	0	ko00900,ko01100,ko01110,ko01130,ko05164,ko05166,map00900,map01100,map01110,map01130,map05164,map05166	polyprenyl_synt	Yes
Within-group	Bulk-R_Infected_vs_Control	MD16G1029200	Chr16	2082095	2084343	-	3.62263	3.18803	5.1567	1.4775e-06	9.14834e-06	4.74907	Encodes a protein whose expression is responsive to nematode infection.	Domain of unknown function (DUF4228)	0	0	NA	DUF4228	No
Within-group	Bulk-R_Infected_vs_Control	MD14G1196100	Chr14	28655099	28658370	+	3.62262	0.734143	5.62887	2.0281e-07	1.64981e-06	6.86185	WRKY DNA-binding protein 61	WRKY transcription factor	0	0	NA	WRKY	Yes
Within-group	Bulk-R_Infected_vs_Control	MD01G1229600	Chr01	31888774	31889871	-	3.62187	-2.47945	5.0393	2.39013e-06	1.39325e-05	4.59377	Heavy metal transport/detoxification superfamily protein	Heavy-metal-associated domain	0	0	NA	HMA	Yes
Within-group	Bulk-R_Infected_vs_Control	MD11G1067900	Chr11	5848192	5849680	+	3.62108	-1.44443	4.28744	4.52254e-05	0.000182914	1.84151	Acyl-CoA N-acyltransferases (NAT) superfamily protein	N-acetyltransferase	0	0	NA	Acetyltransf_1	No
Within-group	Bulk-R_Infected_vs_Control	MD11G1164300	Chr11	16714465	16722500	-	3.6195	-2.10974	6.65856	2.11237e-09	3.25426e-08	11.1964	bZIP transcription factor family protein	transcription factor	0	0	ko04075,map04075	DOG1,bZIP_1	No
Within-group	Bulk-R_Infected_vs_Control	MD14G1228700	Chr14	31027847	31033077	-	3.61764	-0.194621	4.00717	0.000126254	0.000448953	0.818714	Protein kinase superfamily protein	Serine threonine-protein kinase	0	0	ko04010,ko04064,ko04620,ko04621,ko04624,ko04722,ko05133,ko05140,ko05142,ko05145,ko05152,ko05162,ko05164,map04010,map04064,map04620,map04621,map04624,map04722,map05133,map05140,map05142,map05145,map05152,map05162,map05164	GUB_WAK_bind,Pkinase,Pkinase_Tyr,WAK_assoc	Yes
Within-group	Bulk-R_Infected_vs_Control	MD11G1203600	Chr11	29729364	29735286	+	3.60813	5.78068	13.4059	3.49733e-23	1.41432e-19	42.2318	multidrug resistance-associated protein 3	ABC transporter C family member	0	0	ko01523,ko01524,ko02010,ko04976,map01523,map01524,map02010,map04976	ABC_membrane,ABC_tran	Yes
Within-group	Bulk-R_Infected_vs_Control	MD05G1056300	Chr05	9876321	9877052	-	3.60794	-3.008	4.80744	6.07895e-06	3.14314e-05	3.73084	Receptor-like protein kinase-related family protein	Cysteine-rich repeat secretory protein	0	0	NA	DUF1204,Stress-antifung	Yes
Within-group	Bulk-R_Infected_vs_Control	MD07G1024500	Chr07	2046172	2049827	-	3.60787	3.54333	7.90902	6.21333e-12	2.23597e-10	16.772	Plasma-membrane choline transporter family protein	Belongs to the CTL (choline transporter-like) family	0	0	NA	Choline_transpo	No
Within-group	Bulk-R_Infected_vs_Control	MD01G1042900	Chr01	14134324	14136005	-	3.60269	-2.78261	5.24356	1.03158e-06	6.69213e-06	5.37696	elicitor-activated gene 3-1	Dehydrogenase	0	0	ko00940,ko01100,ko01110,map00940,map01100,map01110	ADH_N,ADH_zinc_N	Yes
Within-group	Bulk-R_Infected_vs_Control	MD15G1222400	Chr15	18064557	18067759	+	3.60254	-2.29321	4.76864	7.09107e-06	3.5851e-05	3.57977	flavin-dependent monooxygenase 1	flavin-containing monooxygenase	0	0	ko00982,ko01120,map00982,map01120	FMO-like	Yes
Within-group	Bulk-R_Infected_vs_Control	MD13G1050400	Chr13	3581239	3586779	+	3.60135	4.25625	6.31961	9.77981e-09	1.19892e-07	9.40151	ATPase E1-E2 type family protein / haloacid dehalogenase-like hydrolase family protein	Belongs to the cation transport ATPase (P-type) (TC 3.A.3) family. Type IV subfamily	0	0	NA	Cation_ATPase,E1-E2_ATPase,PhoLip_ATPase_C,PhoLip_ATPase_N	Yes
Within-group	Bulk-R_Infected_vs_Control	MD13G1184800	Chr13	15702363	15703679	+	3.59948	3.01896	4.11775	8.46175e-05	0.000316552	0.866718	Eukaryotic aspartyl protease family protein	Belongs to the peptidase A1 family	0	0	NA	TAXi_C,TAXi_N	Yes
Within-group	Bulk-R_Infected_vs_Control	MD13G1092700	Chr13	6542902	6543792	-	3.5989	3.17385	4.75009	7.63116e-06	3.83002e-05	3.13425	Protein of unknown function (DUF1645)	Protein of unknown function (DUF1645)	0	0	NA	DUF1645	Yes
Within-group	Bulk-R_Infected_vs_Control	MD07G1168000	Chr07	24253626	24255422	-	3.59862	2.14909	2.26192	0.0261058	0.046887	-4.25714	Major facilitator superfamily protein	Nodulin-like	0	0	NA	MFS_1,Nodulin-like	Yes
Within-group	Bulk-R_Infected_vs_Control	MD08G1033000	Chr08	2341315	2343748	-	3.59816	4.53387	8.49519	3.80953e-13	2.13968e-11	19.4003	cytochrome P450	Cytochrome p450	0	0	NA	p450	Yes
Within-group	Bulk-R_Infected_vs_Control	MD17G1273200	Chr17	33526361	33530129	+	3.59802	-0.258746	5.53134	3.07608e-07	2.38137e-06	6.49091	S-locus lectin protein kinase family protein	G-type lectin S-receptor-like serine threonine-protein kinase	0	0	NA	B_lectin,DUF3403,PAN_2,Pkinase_Tyr,S_locus_glycop	Yes
Within-group	Bulk-R_Infected_vs_Control	MD15G1011400	Chr15	629335	636133	+	3.59733	-0.294888	3.5455	0.000623753	0.00181848	-0.672032	Transducin/WD40 repeat-like superfamily protein	RING-type E3 ubiquitin transferase	0	0	NA	U-box,WD40	Yes
Within-group	Bulk-R_Infected_vs_Control	MD15G1367300	Chr15	44696758	44699352	-	3.59668	-0.103637	5.31186	7.76159e-07	5.24114e-06	5.60751	annexin 1	Annexin D1-like	0	0	NA	Annexin	No
Within-group	Bulk-R_Infected_vs_Control	MD13G1033900	Chr13	2376989	2379265	+	3.59652	1.05465	7.20028	1.73942e-10	3.92424e-09	13.6328	Cytochrome P450 superfamily protein	Cytochrome p450	0	0	ko00905,map00905	p450	Yes
Within-group	Bulk-R_Infected_vs_Control	MD13G1222900	Chr13	21618933	21625104	-	3.59447	5.8217	7.40733	6.61412e-11	1.6974e-09	14.1638	isopropyl malate isomerase large subunit 1	3-isopropylmalate	0	0	ko00290,ko00660,ko00966,ko01100,ko01110,ko01210,ko01230,map00290,map00660,map00966,map01100,map01110,map01210,map01230	Aconitase	Yes
Within-group	Bulk-R_Infected_vs_Control	MD01G1234900	Chr01	32249250	32252394	-	3.59329	-2.73319	4.29671	4.36848e-05	0.000177393	1.90497	Laccase/Diphenol oxidase family protein	Lignin degradation and detoxification of lignin-derived products	0	0	NA	Cu-oxidase,Cu-oxidase_2,Cu-oxidase_3	Yes
Within-group	Bulk-R_Infected_vs_Control	MD06G1003600	Chr06	428188	430825	+	3.59021	-0.890642	3.78271	0.000278702	0.00089932	0.123491	NAD(P)-binding Rossmann-fold superfamily protein	NA	0	0	NA	NA	Yes
Within-group	Bulk-R_Infected_vs_Control	MD08G1152200	Chr08	16332481	16336532	+	3.58954	-1.23692	5.2405	1.04476e-06	6.7641e-06	5.3583	NA	NA	0	0	NA	NA	Yes
Within-group	Bulk-R_Infected_vs_Control	MD10G1089800	Chr10	13399812	13400628	+	3.58894	-1.27966	3.66176	0.000422003	0.00128981	-0.250167	Cupredoxin superfamily protein	Plastocyanin-like domain protein	0	0	NA	Cu_bind_like	Yes
Within-group	Bulk-R_Infected_vs_Control	MD04G1237400	Chr04	31568999	31570763	-	3.58835	2.01767	5.26894	9.28264e-07	6.12257e-06	5.31005	F-box family protein	f-box protein	0	0	NA	F-box,PP2	Yes
Within-group	Bulk-R_Infected_vs_Control	MD15G1294300	Chr15	27459096	27459975	+	3.58441	-2.20673	7.02809	3.86804e-10	7.70086e-09	12.7701	NA	NA	0	0	NA	NA	Yes
Within-group	Bulk-R_Infected_vs_Control	MD06G1094400	Chr06	22609906	22610553	+	3.58381	-1.21917	4.02883	0.000116798	0.000419348	0.958777	Late embryogenesis abundant (LEA) hydroxyproline-rich glycoprotein family	Late embryogenesis abundant protein	0	0	NA	LEA_2	Yes
Within-group	Bulk-R_Infected_vs_Control	MD15G1132100	Chr15	9576019	9576932	-	3.58124	-0.345381	2.40344	0.0182892	0.0343728	-3.67087	Chalcone and stilbene synthase family protein	Belongs to the chalcone stilbene synthases family	0	0	ko00941,ko01100,ko01110,ko04712,map00941,map01100,map01110,map04712	Chal_sti_synt_C,Chal_sti_synt_N	No
Within-group	Bulk-R_Infected_vs_Control	MD04G1239400	Chr04	31757778	31759481	+	3.58043	-0.655407	4.22058	5.79886e-05	0.00022729	1.56697	wall associated kinase-like 1	wall-associated receptor kinase-like	0	0	NA	LysM,Pkinase,Pkinase_Tyr	Yes
Within-group	Bulk-R_Infected_vs_Control	MD15G1077000	Chr15	5238668	5241040	-	3.58026	6.9774	8.63576	1.94451e-13	1.19599e-11	19.8502	N-terminal nucleophile aminohydrolases (Ntn hydrolases) superfamily protein	isoaspartyl peptidase L-asparaginase	0	0	NA	Asparaginase_2	Yes
Within-group	Bulk-R_Infected_vs_Control	MD10G1153100	Chr10	24047600	24049372	-	3.57984	0.0898859	4.20915	6.04936e-05	0.000235833	1.49497	Protein of unknown function	dCTP pyrophosphatase 1-like	0	0	ko00240,ko01100,map00240,map01100	MazG,MazG-like	Yes
Within-group	Bulk-R_Infected_vs_Control	MD10G1176100	Chr10	26845060	26852392	+	3.57963	-1.42294	4.53603	1.76024e-05	7.95799e-05	2.70911	Long-chain fatty alcohol dehydrogenase family protein	GMC oxidoreductase	0	0	NA	GMC_oxred_C,GMC_oxred_N	Yes
Within-group	Bulk-R_Infected_vs_Control	MD11G1190800	Chr11	27003483	27009027	+	3.57641	9.40048	11.4682	2.62898e-19	1.80963e-16	33.3296	NAD(P)-binding Rossmann-fold superfamily protein	Encoded by	0	0	NA	3Beta_HSD,Epimerase	Yes
Within-group	Bulk-R_Infected_vs_Control	MD04G1217600	Chr04	30023580	30024086	+	3.57619	-1.93027	7.94354	5.27507e-12	1.95486e-10	16.8239	Acyl-CoA N-acyltransferases (NAT) superfamily protein	Acetyltransferase (GNAT) domain	0	0	NA	Acetyltransf_3	No
Within-group	Bulk-R_Infected_vs_Control	MD03G1110700	Chr03	9638617	9639810	-	3.57592	-0.210446	6.64512	2.24578e-09	3.41909e-08	11.1765	F-box family protein	f-box protein	0	0	NA	F-box,FBA_3	Yes
Within-group	Bulk-R_Infected_vs_Control	MD07G1156200	Chr07	22690999	22692639	-	3.57431	5.16348	8.07136	2.87474e-12	1.15676e-10	17.3001	homeobox 7	Homeobox-leucine zipper protein	0	0	NA	HALZ,Homeobox	Yes
Within-group	Bulk-R_Infected_vs_Control	MD13G1218900	Chr13	21148526	21157623	+	3.5702	-0.599354	6.13901	2.18843e-08	2.43056e-07	9.00573	peptide transporter 3	Protein NRT1 PTR FAMILY 5.2-like	0	0	NA	PTR2	Yes
Within-group	Bulk-R_Infected_vs_Control	MD17G1247300	Chr17	29632164	29634267	+	3.56949	-2.89516	5.00402	2.75881e-06	1.57906e-05	4.46125	Core-2/I-branching beta-1	Core-2/I-Branching enzyme	0	0	NA	Branch	Yes
Within-group	Bulk-R_Infected_vs_Control	MD15G1290300	Chr15	26827374	26831019	-	3.56873	4.85772	7.77679	1.16198e-11	3.80388e-10	16.0068	cytochrome P450	Belongs to the cytochrome P450 family	0	0	ko00140,ko00380,ko00590,ko00591,ko00830,ko00905,ko00943,ko00980,ko01100,ko01110,ko04212,ko04726,ko04750,ko04913,ko04917,ko04927,ko04934,ko05204,map00140,map00380,map00590,map00591,map00830,map00905,map00943,map00980,map01100,map01110,map04212,map04726,map04750,map04913,map04917,map04927,map04934,map05204	p450	Yes
Within-group	Bulk-R_Infected_vs_Control	MD07G1283700	Chr07	34649347	34652300	+	3.56388	4.17945	8.79871	8.90914e-14	6.26584e-12	20.8767	Leucine-rich repeat protein kinase family protein	inactive receptor kinase	0	0	NA	LRRNT_2,LRR_1,LRR_4,LRR_8,Pkinase,Pkinase_Tyr	No
Within-group	Bulk-R_Infected_vs_Control	MD02G1150100	Chr02	12342226	12345138	-	3.56011	4.07076	5.27276	9.13627e-07	6.03783e-06	5.01775	F-box family protein	f-box protein	0	0	NA	F-box	Yes
Within-group	Bulk-R_Infected_vs_Control	MD17G1049800	Chr17	3678393	3679692	-	3.56007	2.87935	3.5194	0.000680204	0.00196271	-1.07825	Protein of unknown function	NA	0	0	NA	NA	No
Within-group	Bulk-R_Infected_vs_Control	MD11G1268000	Chr11	38360276	38360665	-	3.55985	-0.636385	4.82053	5.77037e-06	3.0052e-05	3.73794	NA	NA	0	0	NA	NA	No
Within-group	Bulk-R_Infected_vs_Control	MD08G1126500	Chr08	11892915	11894200	+	3.5598	6.19094	8.6777	1.59075e-13	1.0091e-11	20.0879	FAD-dependent oxidoreductase family protein	Sarcosine oxidase	0	0	ko00260,ko00310,ko01100,ko04146,map00260,map00310,map01100,map04146	DAO	Yes
Within-group	Bulk-R_Infected_vs_Control	MD13G1103500	Chr13	7387120	7389501	+	3.55705	4.91178	7.68737	1.77263e-11	5.51424e-10	15.552	cytochrome P450	Cytochrome p450	0	0	NA	p450	Yes
Within-group	Bulk-R_Infected_vs_Control	MD15G1309000	Chr15	30997428	30999204	+	3.54917	-2.82142	4.08844	9.4144e-05	0.00034749	1.20453	cinnamyl alcohol dehydrogenase 6	Dehydrogenase	0	0	ko00940,ko01100,ko01110,map00940,map01100,map01110	ADH_N,ADH_zinc_N	Yes
Within-group	Bulk-R_Infected_vs_Control	MD14G1187200	Chr14	27949418	27949669	+	3.54742	1.1275	6.08287	2.80621e-08	3.0022e-07	8.7282	Protein of unknown function	NA	0	0	NA	NA	Yes
Within-group	Bulk-R_Infected_vs_Control	MD00G1167500	Chr00	38484124	38487736	-	3.54315	-2.57942	5.62792	2.03637e-07	1.65571e-06	6.89146	ACC synthase 1	1-aminocyclopropane-1-carboxylate synthase	0	0	ko00270,ko01100,ko01110,ko04016,map00270,map01100,map01110,map04016	Aminotran_1_2	Yes
Within-group	Bulk-R_Infected_vs_Control	MD04G1238900	Chr04	31711219	31712883	-	3.54265	0.801263	4.88241	4.50616e-06	2.42245e-05	3.88925	wall associated kinase-like 2	wall-associated receptor kinase-like	0	0	NA	LysM,Pkinase,Pkinase_Tyr	Yes
Within-group	Bulk-R_Infected_vs_Control	MD11G1262600	Chr11	37756958	37758280	-	3.54098	-1.48745	3.63937	0.000455271	0.0013786	-0.303603	D-mannose binding lectin protein with Apple-like carbohydrate-binding domain	Epidermis-specific secreted glycoprotein	0	0	NA	B_lectin,PAN_2,S_locus_glycop	No
Within-group	Bulk-R_Infected_vs_Control	MD03G1120000	Chr03	11007147	11009946	-	3.53976	-1.38824	4.00505	0.000127221	0.000452042	0.876729	Nucleotide/sugar transporter family protein	membrane protein At1g06890-like	0	0	NA	TPT	No
Within-group	Bulk-R_Infected_vs_Control	MD07G1295400	Chr07	35611301	35612497	-	3.53697	3.0987	6.48891	4.56348e-09	6.30392e-08	10.3426	Yippee family putative zinc-binding protein	Belongs to the yippee family	0	0	NA	Yippee-Mis18	No
Within-group	Bulk-R_Infected_vs_Control	MD04G1081000	Chr04	11187357	11189696	-	3.53293	5.13928	8.75074	1.12114e-13	7.57224e-12	20.5001	Bifunctional inhibitor/lipid-transfer protein/seed storage 2S albumin superfamily protein	lipid transfer-like protein	0	0	NA	LTP_2	Yes
Within-group	Bulk-R_Infected_vs_Control	MD02G1069100	Chr02	5597370	5601032	-	3.53225	5.35666	6.56044	3.3004e-09	4.74976e-08	10.339	gamma-glutamyl transpeptidase 4	Gamma-glutamyltranspeptidase	0	0	ko00430,ko00460,ko00480,ko00590,ko01100,map00430,map00460,map00480,map00590,map01100	G_glu_transpept	Yes
Within-group	Bulk-R_Infected_vs_Control	MD05G1178100	Chr05	30476390	30479300	-	3.52828	3.97838	3.56225	0.000589914	0.00173279	-1.15914	Tetratricopeptide repeat (TPR)-like superfamily protein	Tetratricopeptide repeat	0	0	NA	TPR_1,TPR_2,TPR_8	No
Within-group	Bulk-R_Infected_vs_Control	MD05G1333700	Chr05	45677251	45682850	+	3.52276	-0.569599	3.55125	0.000611932	0.00178885	-0.62961	S-locus lectin protein kinase family protein	G-type lectin S-receptor-like serine threonine-protein kinase	0	0	NA	B_lectin,DUF3403,PAN_2,Pkinase_Tyr,S_locus_glycop	No
Within-group	Bulk-R_Infected_vs_Control	MD06G1218600	Chr06	35148578	35150349	+	3.52182	0.287037	5.21195	1.17608e-06	7.49428e-06	5.19983	receptor serine/threonine kinase	NA	0	0	NA	NA	Yes
Within-group	Bulk-R_Infected_vs_Control	MD01G1118300	Chr01	23211441	23212288	-	3.52082	1.44337	4.83731	5.39708e-06	2.84097e-05	3.6723	Chalcone-flavanone isomerase family protein	Belongs to the chalcone isomerase family	0	0	ko00941,ko01100,ko01110,map00941,map01100,map01110	Chalcone	Yes
Within-group	Bulk-R_Infected_vs_Control	MD03G1177200	Chr03	24377852	24389447	+	3.51999	0.844419	3.73472	0.000328897	0.0010387	-0.108754	xanthine dehydrogenase 1	Xanthine dehydrogenase	0	0	ko00230,ko00232,ko00983,ko01100,ko01110,ko01120,ko04146,map00230,map00232,map00983,map01100,map01110,map01120,map04146	Ald_Xan_dh_C,Ald_Xan_dh_C2,CO_deh_flav_C,FAD_binding_5,Fer2,Fer2_2	No
Within-group	Bulk-R_Infected_vs_Control	MD03G1186000	Chr03	25353634	25354728	-	3.51851	0.536053	6.18027	1.82195e-08	2.06966e-07	9.15991	receptor kinase 1	G-type lectin S-receptor-like serine threonine-protein kinase	0	0	NA	B_lectin,DUF3403,PAN_2,Pkinase,Pkinase_Tyr,S_locus_glycop	Yes
Within-group	Bulk-R_Infected_vs_Control	MD11G1093700	Chr11	7791452	7796629	-	3.5161	2.66528	2.94246	0.00413897	0.00945381	-2.73204	tropinone reductase	Tropinone reductase homolog At1g07440-like	0	0	ko00960,ko01100,ko01110,map00960,map01100,map01110	adh_short,adh_short_C2	Yes
Within-group	Bulk-R_Infected_vs_Control	MD03G1011900	Chr03	914041	914244	+	3.51193	-2.58594	5.39994	5.36437e-07	3.81928e-06	5.98661	Protein of unknown function	NA	0	0	NA	NA	Yes
Within-group	Bulk-R_Infected_vs_Control	MD15G1148900	Chr15	11014902	11018089	+	3.51183	-2.64863	4.23632	5.47046e-05	0.000216014	1.69707	Leucine-rich receptor-like protein kinase family protein	Belongs to the protein kinase superfamily. Ser Thr protein kinase family	0	0	NA	LRRNT_2,LRR_1,LRR_4,LRR_6,LRR_8,Pkinase	Yes
Within-group	Bulk-R_Infected_vs_Control	MD04G1236300	Chr04	31527526	31529667	+	3.51066	0.8044	5.42267	4.87459e-07	3.51701e-06	6.01799	phloem protein 2-B1	f-box protein	0	0	NA	F-box,PP2	No
Within-group	Bulk-R_Infected_vs_Control	MD10G1166300	Chr10	25665499	25668698	-	3.50972	4.24539	4.08848	9.41304e-05	0.000347479	0.540911	Tetratricopeptide repeat (TPR)-like superfamily protein	Tetratricopeptide repeat	0	0	NA	TPR_1,TPR_2,TPR_8	Yes
Within-group	Bulk-R_Infected_vs_Control	MD10G1323800	Chr10	40468681	40469952	-	3.50398	-2.70448	4.8732	4.67557e-06	2.50106e-05	3.97352	F-box family protein with a domain of unknown function (DUF295)	f-box protein	0	0	NA	Chloroplast_duf	Yes
Within-group	Bulk-R_Infected_vs_Control	MD07G1265900	Chr07	33427173	33428512	+	3.50226	-2.52569	3.61508	0.000494172	0.00148005	-0.33135	PEBP (phosphatidylethanolamine-binding protein) family protein	CEN-like protein	0	0	NA	PBP	No
Within-group	Bulk-R_Infected_vs_Control	MD03G1233100	Chr03	31865949	31868027	-	3.49945	1.00967	5.49613	3.57246e-07	2.69534e-06	6.28283	Concanavalin A-like lectin protein kinase family protein	L-type lectin-domain containing receptor kinase IX.1-like	0	0	ko04010,ko04064,ko04620,ko04621,ko04624,ko04722,ko05133,ko05140,ko05142,ko05145,ko05152,ko05162,ko05164,map04010,map04064,map04620,map04621,map04624,map04722,map05133,map05140,map05142,map05145,map05152,map05162,map05164	Lectin_legB,Pkinase	Yes
Within-group	Bulk-R_Infected_vs_Control	MD02G1292200	Chr02	34813693	34815018	+	3.49864	-0.73219	5.52058	3.2201e-07	2.47391e-06	6.45631	NA	NA	0	0	NA	NA	Yes
Within-group	Bulk-R_Infected_vs_Control	MD07G1152700	Chr07	22233012	22237000	-	3.49854	3.41356	5.43932	4.54374e-07	3.30558e-06	5.83457	Tetratricopeptide repeat (TPR)-like superfamily protein	nephrocystin-3-like	0	0	NA	TPR_10,TPR_12,TPR_7,TPR_8	No
Within-group	Bulk-R_Infected_vs_Control	MD17G1192600	Chr17	23056662	23057680	+	3.4897	1.6357	5.3602	6.33955e-07	4.41639e-06	5.70652	NA	NA	0	0	NA	NA	Yes
Within-group	Bulk-R_Infected_vs_Control	MD09G1132100	Chr09	10159385	10161087	-	3.48867	-2.01217	4.63008	1.22237e-05	5.77485e-05	3.07499	Subtilase family protein	subtilisin-like protease	0	0	NA	Inhibitor_I9,PA,Peptidase_S8	Yes
Within-group	Bulk-R_Infected_vs_Control	MD12G1239400	Chr12	31208727	31211018	-	3.48677	5.71791	8.90264	5.41337e-14	4.18979e-12	21.2054	NAD(P)-linked oxidoreductase superfamily protein	aldo-keto reductase	0	0	NA	Aldo_ket_red	Yes
Within-group	Bulk-R_Infected_vs_Control	MD02G1236100	Chr02	28241902	28242900	-	3.48646	6.69921	7.09094	2.891e-10	6.00723e-09	12.6309	glutathione S-transferase TAU 8	Belongs to the GST superfamily	0	0	ko00480,ko00980,ko00982,ko00983,ko01524,ko05200,ko05204,ko05225,ko05418,map00480,map00980,map00982,map00983,map01524,map05200,map05204,map05225,map05418	GST_C,GST_N	Yes
Within-group	Bulk-R_Infected_vs_Control	MD01G1106900	Chr01	21972591	21976836	-	3.48594	6.13399	8.22356	1.39309e-12	6.4201e-11	17.9334	phenylalanine ammonia-lyase 2	Phenylalanine ammonia-lyase	0	0	ko00360,ko00940,ko01100,ko01110,map00360,map00940,map01100,map01110	Lyase_aromatic	No
Within-group	Bulk-R_Infected_vs_Control	MD04G1019700	Chr04	2335198	2338163	-	3.47958	-3.07757	5.5207	3.21851e-07	2.47328e-06	6.4617	indole-3-acetate beta-D-glucosyltransferase	Belongs to the UDP-glycosyltransferase family	0	0	NA	UDPGT	No
Within-group	Bulk-R_Infected_vs_Control	MD02G1153000	Chr02	12666527	12668779	-	3.47629	2.16644	7.05765	3.37338e-10	6.84942e-09	12.9362	UDP-glucosyl transferase 72E1	Belongs to the UDP-glycosyltransferase family	0	0	ko00940,map00940	UDPGT	Yes
Within-group	Bulk-R_Infected_vs_Control	MD11G1215300	Chr11	31449069	31451532	+	3.47379	-1.97702	4.18962	6.50142e-05	0.000251175	1.51745	glyoxalase I homolog	lactoylglutathione	0	0	ko00620,map00620	Glyoxalase	Yes
Within-group	Bulk-R_Infected_vs_Control	MD14G1027100	Chr14	2467861	2469372	-	3.47231	2.78278	6.16193	1.97667e-08	2.21892e-07	8.91229	Protein of unknown function	Has 11 Blast hits to 11 proteins in 5 species Archae - 0	0	0	NA	NA	Yes
Within-group	Bulk-R_Infected_vs_Control	MD13G1144500	Chr13	11227001	11228181	-	3.47183	-1.79947	6.42904	5.97974e-09	7.88011e-08	10.2194	1-cysteine peroxiredoxin 1	1-Cys peroxiredoxin	0	0	ko00940,ko01100,ko01110,map00940,map01100,map01110	1-cysPrx_C,AhpC-TSA	Yes
Within-group	Bulk-R_Infected_vs_Control	MD15G1059600	Chr15	3979010	3983327	-	3.4676	1.02938	4.80778	6.07086e-06	3.13946e-05	3.57278	glutamate receptor 2.7	Glutamate receptor	0	0	NA	ANF_receptor,Lig_chan,SBP_bac_3	Yes
Within-group	Bulk-R_Infected_vs_Control	MD13G1022500	Chr13	1619144	1622114	-	3.46536	-1.47294	5.57919	2.50846e-07	1.98711e-06	6.70113	Adenine nucleotide alpha hydrolases-like superfamily protein	U-box domain-containing protein	0	0	NA	Usp	Yes
Within-group	Bulk-R_Infected_vs_Control	MD02G1248500	Chr02	29938121	29939515	-	3.465	-3.14957	4.02961	0.000116471	0.000418384	1.00958	UDP-Glycosyltransferase superfamily protein	Belongs to the UDP-glycosyltransferase family	0	0	NA	UDPGT	No
Within-group	Bulk-R_Infected_vs_Control	MD13G1160700	Chr13	12613434	12613980	-	3.46265	5.76541	6.05933	3.11386e-08	3.29322e-07	8.07472	MLP-like protein 423	Major allergen Pru	0	0	NA	Bet_v_1	Yes
Within-group	Bulk-R_Infected_vs_Control	MD12G1075900	Chr12	9193507	9196114	+	3.46066	1.74461	3.51918	0.000680684	0.00196392	-0.894236	Glycosyltransferase family 61 protein	Protein of unknown function (DUF563)	0	0	ko00514,map00514	DUF563	No
Within-group	Bulk-R_Infected_vs_Control	MD09G1033600	Chr09	2059256	2061179	-	3.45994	9.36763	5.77036	1.10223e-07	9.72706e-07	6.81208	Oxidoreductase	2-methylene-furan-3-one reductase-like	0	0	NA	ADH_N,ADH_zinc_N,ADH_zinc_N_2	Yes
Within-group	Bulk-R_Infected_vs_Control	MD10G1221000	Chr10	31915687	31921909	-	3.45837	6.49269	7.62972	2.32628e-11	6.94919e-10	15.1249	CTP synthase family protein	Catalyzes the ATP-dependent amination of UTP to CTP with either L-glutamine or ammonia as the source of nitrogen	0	0	ko00240,ko01100,map00240,map01100	CTP_synth_N,GATase	No
Within-group	Bulk-R_Infected_vs_Control	MD02G1196900	Chr02	18933920	18938830	-	3.45637	-2.58222	3.77194	0.000289288	0.000929031	0.168235	xylem serine peptidase 1	Xylem serine proteinase	0	0	NA	Inhibitor_I9,Peptidase_S8	No
Within-group	Bulk-R_Infected_vs_Control	MD03G1230300	Chr03	31541559	31544632	-	3.45169	2.8424	5.72237	1.35644e-07	1.16463e-06	7.08671	MATE efflux family protein	MATE efflux family protein	0	0	NA	MatE	Yes
Within-group	Bulk-R_Infected_vs_Control	MD04G1169200	Chr04	25968356	25969714	+	3.44901	0.229015	4.60749	1.33473e-05	6.24098e-05	2.88431	Protein of unknown function (DUF567)	LURP-one-related	0	0	NA	LOR	Yes
Within-group	Bulk-R_Infected_vs_Control	MD03G1230600	Chr03	31586432	31588342	+	3.44896	-1.60111	4.61756	1.28344e-05	6.02554e-05	3.01821	squamosa promoter binding protein-like 5	squamosa	0	0	NA	SBP	No
Within-group	Bulk-R_Infected_vs_Control	MD09G1065600	Chr09	4474141	4475499	-	3.44765	-1.44826	5.03089	2.47339e-06	1.4367e-05	4.54953	Cyclin-like family protein	Transcription initiation factor	0	0	ko03022,ko05169,ko05203,map03022,map05169,map05203	TFIIB,TF_Zn_Ribbon	Yes
Within-group	Bulk-R_Infected_vs_Control	MD07G1272000	Chr07	33849040	33852175	+	3.4437	-0.677993	3.29011	0.00142994	0.00374859	-1.38208	cytochrome P450	Belongs to the cytochrome P450 family	0	0	NA	p450	Yes
Within-group	Bulk-R_Infected_vs_Control	MD10G1246900	Chr10	33976345	33977641	-	3.44344	2.24053	4.42823	2.65996e-05	0.000114146	2.08054	oxidative stress 3	RNA binding	0	0	NA	NA	No
Within-group	Bulk-R_Infected_vs_Control	MD07G1280800	Chr07	34447440	34448946	+	3.44275	6.58395	9.08024	2.3093e-14	2.1285e-12	21.9811	UDP-glucosyl transferase 88A1	UDP-Glycosyltransferase	0	0	NA	UDPGT	Yes
Within-group	Bulk-R_Infected_vs_Control	MD14G1224400	Chr14	30533922	30536909	+	3.44233	-1.35324	4.90986	4.03601e-06	2.20191e-05	4.08325	Cytochrome P450 superfamily protein	Cytochrome p450	0	0	NA	p450	Yes
Within-group	Bulk-R_Infected_vs_Control	MD02G1026200	Chr02	1980657	1981937	+	3.44148	3.17792	3.39113	0.00103486	0.00282436	-1.47804	Raffinose synthase family protein	galactinol--sucrose galactosyltransferase	0	0	ko00052,map00052	Raffinose_syn	No
Within-group	Bulk-R_Infected_vs_Control	MD17G1249600	Chr17	29793637	29802662	-	3.44033	0.804604	6.06215	3.07526e-08	3.25559e-07	8.64452	Pathogenesis-related thaumatin superfamily protein	Thaumatin-like protein	0	0	NA	Thaumatin	Yes
Within-group	Bulk-R_Infected_vs_Control	MD10G1307600	Chr10	39282211	39285478	-	3.43965	0.341985	7.31547	1.01647e-10	2.46697e-09	14.1399	S-locus lectin protein kinase family protein	serine threonine-protein kinase	0	0	NA	B_lectin,DUF3403,PAN_2,Pkinase,Pkinase_Tyr,S_locus_glycop	Yes
Within-group	Bulk-R_Infected_vs_Control	MD02G1303800	Chr02	35741403	35746948	+	3.43888	1.88741	6.75312	1.37145e-09	2.24313e-08	11.589	NAD(P)-binding Rossmann-fold superfamily protein	reductase 1-like	0	0	NA	Epimerase	Yes
Within-group	Bulk-R_Infected_vs_Control	MD15G1432600	Chr15	53291576	53293115	+	3.43824	-0.649177	6.43347	5.86148e-09	7.73687e-08	10.2601	Disease resistance protein (TIR-NBS-LRR class) family	TMV resistance protein N-like	0	0	NA	NB-ARC,TIR	Yes
Within-group	Bulk-R_Infected_vs_Control	MD09G1010000	Chr09	679939	681272	-	3.43764	-1.02409	4.62808	1.23191e-05	5.80889e-05	3.01861	Peroxidase superfamily protein	Removal of H(2)O(2), oxidation of toxic reductants, biosynthesis and degradation of lignin, suberization, auxin catabolism, response to environmental stresses such as wounding, pathogen attack and oxidative stress	0	0	ko00940,ko01100,ko01110,map00940,map01100,map01110	peroxidase	No
Within-group	Bulk-R_Infected_vs_Control	MD17G1041500	Chr17	3032288	3034001	+	3.43591	1.5451	3.37716	0.0010826	0.00293657	-1.3358	GAST1 protein homolog 4	NA	0	0	NA	NA	No
Within-group	Bulk-R_Infected_vs_Control	MD13G1096200	Chr13	6790955	6803106	-	3.43202	1.01522	6.90044	6.97309e-10	1.27238e-08	12.2916	cysteine-rich RLK (RECEPTOR-like protein kinase) 2	Cysteine-rich receptor-like protein kinase	0	0	NA	Pkinase,Pkinase_Tyr,Stress-antifung	Yes
Within-group	Bulk-R_Infected_vs_Control	MD05G1062200	Chr05	10952666	10953436	+	3.42743	5.4752	9.44011	4.10646e-15	5.18954e-13	23.7619	basic leucine-zipper 44	Ocs element-binding factor 1-like	0	0	NA	bZIP_1	Yes
Within-group	Bulk-R_Infected_vs_Control	MD12G1151600	Chr12	23134350	23136731	+	3.42022	-2.86743	4.77965	6.78833e-06	3.45091e-05	3.62756	lectin protein kinase family protein	Receptor protein kinase	0	0	NA	B_lectin,PAN_1,PAN_2,Pkinase,S_locus_glycop	No
Within-group	Bulk-R_Infected_vs_Control	MD12G1113000	Chr12	17892653	17895805	+	3.41535	7.13497	10.7847	6.64113e-18	2.55778e-15	30.0845	Heavy metal transport/detoxification superfamily protein	Axoneme-associated protein mst101(2)-like	0	0	NA	HMA	No
Within-group	Bulk-R_Infected_vs_Control	MD09G1095900	Chr09	6920921	6924320	+	3.41391	3.48934	8.47064	4.28381e-13	2.35297e-11	19.3871	receptor kinase 3	serine threonine-protein kinase	0	0	NA	B_lectin,DUF3403,PAN_2,Pkinase,Pkinase_Tyr,S_locus_glycop	Yes
Within-group	Bulk-R_Infected_vs_Control	MD09G1147500	Chr09	11568160	11572398	+	3.40712	0.606709	5.64036	1.9306e-07	1.58004e-06	6.89139	NAC domain containing protein 42	Transcription factor JUNGBRUNNEN 1-like	0	0	NA	NAM	Yes
Within-group	Bulk-R_Infected_vs_Control	MD05G1210000	Chr05	34146212	34147596	+	3.40396	6.41674	6.08564	2.77203e-08	2.97198e-07	8.13914	glutathione S-transferase TAU 19	Glutathione S-transferase	0	0	ko00480,ko00980,ko00982,ko00983,ko01524,ko05200,ko05204,ko05225,ko05418,map00480,map00980,map00982,map00983,map01524,map05200,map05204,map05225,map05418	GST_C,GST_C_2,GST_N,GST_N_3	Yes
Within-group	Bulk-R_Infected_vs_Control	MD14G1002100	Chr14	351884	352711	-	3.39946	4.41407	8.42683	5.28132e-13	2.83823e-11	19.0886	NAD(P)-binding Rossmann-fold superfamily protein	Short-chain type dehydrogenase	0	0	ko00061,ko00333,ko00780,ko01040,ko01100,ko01130,ko01212,map00061,map00333,map00780,map01040,map01100,map01130,map01212	adh_short_C2	Yes
Within-group	Bulk-R_Infected_vs_Control	MD16G1056800	Chr16	4086947	4088229	-	3.39868	0.491738	3.41752	0.00095006	0.00262637	-1.11822	Cytochrome P450 superfamily protein	Cytochrome p450	0	0	ko00905,map00905	p450	No
Within-group	Bulk-R_Infected_vs_Control	MD02G1243200	Chr02	29355405	29357144	-	3.39831	-2.64584	4.40763	2.87652e-05	0.000122352	2.29186	NAC domain containing protein 2	NAC domain-containing protein	0	0	NA	NAM	Yes
Within-group	Bulk-R_Infected_vs_Control	MD17G1048800	Chr17	3553774	3557140	+	3.39521	5.0134	7.5361	3.61429e-11	1.01238e-09	14.7949	Galactose mutarotase-like superfamily protein	Converts alpha-aldose to the beta-anomer	0	0	ko00010,ko00052,ko01100,ko01110,ko01120,ko01130,map00010,map00052,map01100,map01110,map01120,map01130	Aldose_epim	Yes
Within-group	Bulk-R_Infected_vs_Control	MD00G1036300	Chr00	6430446	6432342	-	3.39288	5.19159	6.82517	9.8565e-10	1.69076e-08	11.5206	homeobox 7	Homeobox-leucine zipper protein	0	0	NA	HALZ,Homeobox	Yes
Within-group	Bulk-R_Infected_vs_Control	MD01G1052600	Chr01	15764716	15766688	+	3.39165	1.32352	5.70622	1.45429e-07	1.23912e-06	7.13329	NAD(P)-binding Rossmann-fold superfamily protein	( )-neomenthol	0	0	ko00902,ko01110,map00902,map01110	adh_short,adh_short_C2	Yes
Within-group	Bulk-R_Infected_vs_Control	MD03G1212400	Chr03	29168880	29174489	+	3.39102	-1.2806	3.15497	0.00218169	0.005409	-1.73362	galacturonosyltransferase 12	Belongs to the glycosyltransferase 8 family	0	0	NA	Glyco_transf_8	No
Within-group	Bulk-R_Infected_vs_Control	MD13G1040600	Chr13	2775658	2776770	-	3.38947	1.49354	4.57401	1.51997e-05	6.9929e-05	2.67982	isopentenyltransferase 1	Adenylate isopentenyltransferase-like	0	0	ko00908,ko01100,ko01110,map00908,map01100,map01110	IPPT	Yes
Within-group	Bulk-R_Infected_vs_Control	MD16G1217400	Chr16	21484149	21488063	+	3.38881	-1.77913	2.58991	0.0111937	0.022454	-3.152	phosphate transporter 1	Inorganic phosphate transporter	0	0	NA	Sugar_tr	No
Within-group	Bulk-R_Infected_vs_Control	MD09G1182500	Chr09	15699210	15701069	+	3.38709	-1.48065	3.39027	0.00103775	0.00283079	-1.03841	alpha/beta-Hydrolases superfamily protein	Alpha/beta hydrolase family	0	0	NA	Abhydrolase_1,Abhydrolase_6	No
Within-group	Bulk-R_Infected_vs_Control	MD03G1028900	Chr03	2353716	2358216	-	3.38553	4.19696	11.485	2.42941e-19	1.70861e-16	33.5296	cellulose synthase like E1	Belongs to the glycosyltransferase 2 family	0	0	NA	Cellulose_synt	Yes
Within-group	Bulk-R_Infected_vs_Control	MD01G1041300	Chr01	13864724	13868894	+	3.37823	3.15641	5.03087	2.47355e-06	1.4367e-05	4.2089	Deoxyxylulose-5-phosphate synthase	1-deoxy-D-xylulose-5-phosphate synthase 2	0	0	ko00730,ko00900,ko01100,ko01110,ko01130,map00730,map00900,map01100,map01110,map01130	DXP_synthase_N,Transket_pyr,Transketolase_C	No
Within-group	Bulk-R_Infected_vs_Control	MD05G1106000	Chr05	21960782	21961423	-	3.37818	-2.55932	3.69391	0.000378255	0.00117384	-0.0860314	beta glucosidase 13	Belongs to the glycosyl hydrolase 1 family	0	0	ko00460,ko00500,ko00940,ko01100,ko01110,map00460,map00500,map00940,map01100,map01110	Glyco_hydro_1	Yes
Within-group	Bulk-R_Infected_vs_Control	MD09G1080200	Chr09	5619655	5622539	-	3.37759	2.48731	4.62449	1.24927e-05	5.88046e-05	2.74093	Methylenetetrahydrofolate reductase family protein	Converts proline to delta-1-pyrroline-5-carboxylate	0	0	ko00330,ko01100,ko01110,ko01130,map00330,map01100,map01110,map01130	Pro_dh	Yes
Within-group	Bulk-R_Infected_vs_Control	MD07G1051400	Chr07	4718967	4724449	-	3.3763	-0.602427	6.48365	4.67333e-09	6.42002e-08	10.4758	disease resistance family protein / LRR family protein	NA	0	0	NA	NA	No
Within-group	Bulk-R_Infected_vs_Control	MD09G1016600	Chr09	1019538	1025683	-	3.37536	6.24537	6.66155	2.08377e-09	3.22555e-08	10.6936	lysine histidine transporter 1	Lysine histidine transporter	0	0	NA	Aa_trans	Yes
Within-group	Bulk-R_Infected_vs_Control	MD07G1021600	Chr07	1829897	1835764	-	3.3736	3.05449	7.03269	3.78655e-10	7.56187e-09	12.7894	NAD(P)-binding Rossmann-fold superfamily protein	reductase 1-like	0	0	NA	3Beta_HSD,Epimerase	Yes
Within-group	Bulk-R_Infected_vs_Control	MD15G1271300	Chr15	23632013	23633879	+	3.3734	-2.394	6.07476	2.90869e-08	3.09692e-07	8.71593	NA	NA	0	0	NA	NA	No
Within-group	Bulk-R_Infected_vs_Control	MD14G1158700	Chr14	25302918	25303340	-	3.37204	-2.44429	5.76159	1.14489e-07	1.00541e-06	7.43091	Calcium-binding EF-hand family protein	calcium-binding protein	0	0	ko04626,map04626	EF-hand_1,EF-hand_5,EF-hand_6,EF-hand_7,EF-hand_8	Yes
Within-group	Bulk-R_Infected_vs_Control	MD06G1010300	Chr06	1210398	1211868	+	3.37139	3.36009	5.12946	1.65276e-06	1.00773e-05	4.49981	Protein of unknown function (DUF833)	Transport and Golgi organization 2 homolog	0	0	NA	TANGO2	Yes
Within-group	Bulk-R_Infected_vs_Control	MD15G1402800	Chr15	50370562	50373680	-	3.3687	7.76597	7.71861	1.52959e-11	4.86105e-10	15.5234	12-oxophytodienoate reductase 2	12-oxophytodienoate reductase	0	0	ko00592,ko01100,ko01110,map00592,map01100,map01110	Oxidored_FMN	Yes
Within-group	Bulk-R_Infected_vs_Control	MD10G1078100	Chr10	11110995	11111805	-	3.36864	4.31305	6.68973	1.83238e-09	2.89459e-08	10.9901	Protein of unknown function	Organ-specific protein	0	0	NA	Organ_specific	No
Within-group	Bulk-R_Infected_vs_Control	MD15G1020900	Chr15	1211269	1212686	+	3.36669	8.51568	8.57103	2.65058e-13	1.55912e-11	19.5597	thioredoxin H-type 1	Belongs to the thioredoxin family	0	0	ko04621,ko05418,map04621,map05418	Thioredoxin	Yes
Within-group	Bulk-R_Infected_vs_Control	MD16G1033800	Chr16	2433235	2436107	-	3.36608	1.89294	7.91673	5.99039e-12	2.17266e-10	16.8868	MATE efflux family protein	MATE efflux family protein	0	0	NA	MatE	Yes
Within-group	Bulk-R_Infected_vs_Control	MD17G1061700	Chr17	4994159	4994922	+	3.36522	-0.264523	5.28052	8.84581e-07	5.87035e-06	5.49002	SPIRAL1-like2	SPIRAL1-like	0	0	NA	NA	Yes
Within-group	Bulk-R_Infected_vs_Control	MD08G1243000	Chr08	30847344	30850077	-	3.36331	3.68967	7.70392	1.63944e-11	5.15946e-10	15.7409	cytochrome P450	Cytochrome p450	0	0	ko00940,ko00941,ko00945,ko01100,ko01110,map00940,map00941,map00945,map01100,map01110	p450	Yes
Within-group	Bulk-R_Infected_vs_Control	MD01G1195300	Chr01	29367235	29368638	+	3.36325	4.43429	3.25291	0.00160815	0.00415052	-2.19337	GroES-like zinc-binding alcohol dehydrogenase family protein	Sorbitol dehydrogenase-like	0	0	ko00040,ko00051,ko01100,map00040,map00051,map01100	ADH_N,ADH_zinc_N	No
Within-group	Bulk-R_Infected_vs_Control	MD03G1217700	Chr03	30224714	30226924	-	3.3623	-1.79963	4.71415	8.79345e-06	4.34064e-05	3.36739	Protein of unknown function (DUF1223)	Protein of unknown function (DUF1223)	0	0	NA	DUF1223	No
Within-group	Bulk-R_Infected_vs_Control	MD10G1088200	Chr10	13057763	13058473	+	3.3615	-3.48866	6.61295	2.59996e-09	3.88876e-08	10.9519	2-oxoglutarate (2OG) and Fe(II)-dependent oxygenase superfamily protein	Belongs to the iron ascorbate-dependent oxidoreductase family	0	0	NA	2OG-FeII_Oxy,DIOX_N	Yes
Within-group	Bulk-R_Infected_vs_Control	MD05G1210200	Chr05	34165150	34166225	+	3.35692	5.2282	5.35685	6.42926e-07	4.46926e-06	5.11525	glutathione S-transferase TAU 19	Glutathione S-transferase	0	0	ko00480,ko00980,ko00982,ko00983,ko01524,ko05200,ko05204,ko05225,ko05418,map00480,map00980,map00982,map00983,map01524,map05200,map05204,map05225,map05418	GST_C,GST_C_2,GST_N,GST_N_3	Yes
Within-group	Bulk-R_Infected_vs_Control	MD09G1205200	Chr09	19554923	19555534	-	3.35606	-1.61342	4.57388	1.52072e-05	6.99536e-05	2.85039	Protein of unknown function	Avr9 Cf-9 rapidly elicited protein	0	0	NA	DUF761	No
Within-group	Bulk-R_Infected_vs_Control	MD10G1310500	Chr10	39510014	39513062	-	-3.18199	-0.00714621	-3.18297	0.00200078	0.00501426	-1.80149	terpene synthase 14	(3S,6E)-nerolidol synthase	1	0	ko00902,ko00909,ko01100,ko01110,ko01130,map00902,map00909,map01100,map01110,map01130	Terpene_synth,Terpene_synth_C	No
Within-group	Bulk-R_Infected_vs_Control	MD05G1033800	Chr05	5425335	5428427	-	3.35494	5.54031	7.63987	2.21765e-11	6.6616e-10	15.2213	Pyridoxal phosphate (PLP)-dependent transferases superfamily protein	Tryptophan aminotransferase-related protein	0	0	NA	Alliinase_C,EGF_alliinase	Yes
Within-group	Bulk-R_Infected_vs_Control	MD03G1046800	Chr03	3763079	3765620	+	3.3545	-2.13965	3.67992	0.00039674	0.00122276	-0.144265	cytochrome P450	Cytochrome p450	0	0	NA	p450	No
Within-group	Bulk-R_Infected_vs_Control	MD05G1112600	Chr05	23120485	23124018	-	3.35076	4.71913	7.41248	6.45649e-11	1.66174e-09	14.268	Leucine-rich receptor-like protein kinase family protein	receptor-like protein kinase	0	0	NA	LRRNT_2,LRR_1,LRR_8,Pkinase,Pkinase_Tyr	Yes
Within-group	Bulk-R_Infected_vs_Control	MD14G1090500	Chr14	11539908	11544551	+	3.34652	5.65499	5.52588	3.14833e-07	2.428e-06	5.79017	Glycosyl hydrolases family 31 protein	Belongs to the glycosyl hydrolase 31 family	0	0	NA	Glyco_hydro_31	Yes
Within-group	Bulk-R_Infected_vs_Control	MD04G1168400	Chr04	25857382	25858638	+	3.34637	-2.30489	4.56021	1.60334e-05	7.32854e-05	2.82281	NAD(P)-binding Rossmann-fold superfamily protein	short-chain dehydrogenase reductase	0	0	NA	adh_short,adh_short_C2	No
Within-group	Bulk-R_Infected_vs_Control	MD07G1065200	Chr07	6168968	6172815	-	3.34468	4.64555	5.18621	1.30819e-06	8.22918e-06	4.52977	alpha/beta-Hydrolases superfamily protein	Alpha/beta hydrolase family	0	0	NA	Abhydrolase_1,Abhydrolase_6,Hydrolase_4	No
Within-group	Bulk-R_Infected_vs_Control	MD05G1105300	Chr05	21852529	21854509	-	3.34432	-0.0716677	7.30199	1.08257e-10	2.60784e-09	14.0763	Protein kinase superfamily protein	wall-associated receptor kinase-like	0	0	ko04010,ko04064,ko04620,ko04621,ko04624,ko04722,ko05133,ko05140,ko05142,ko05145,ko05152,ko05162,ko05164,map04010,map04064,map04620,map04621,map04624,map04722,map05133,map05140,map05142,map05145,map05152,map05162,map05164	Pkinase,Pkinase_Tyr	Yes
Within-group	Bulk-R_Infected_vs_Control	MD14G1232200	Chr14	31238440	31239843	+	3.34429	5.31952	8.37885	6.64165e-13	3.38913e-11	18.7254	glutathione S-transferase tau 7	glutathione S-transferase	0	0	ko00480,ko00980,ko00982,ko00983,ko01524,ko05200,ko05204,ko05225,ko05418,map00480,map00980,map00982,map00983,map01524,map05200,map05204,map05225,map05418	GST_C,GST_C_2,GST_N	Yes
Within-group	Bulk-R_Infected_vs_Control	MD05G1163300	Chr05	29213006	29214728	-	3.34192	0.944944	5.52254	3.19345e-07	2.45753e-06	6.38955	Protein of unknown function	dCTP pyrophosphatase 1-like	0	0	ko00240,ko01100,map00240,map01100	MazG,MazG-like	Yes
Within-group	Bulk-R_Infected_vs_Control	MD15G1087600	Chr15	6105088	6106146	+	3.34143	0.668987	5.30693	7.92307e-07	5.3357e-06	5.54838	Protein of unknown function (DUF1645)	Protein of unknown function (DUF1645)	0	0	NA	DUF1645	Yes
Within-group	Bulk-R_Infected_vs_Control	MD10G1268500	Chr10	36139905	36143766	+	3.33413	-1.71286	3.74167	0.000321132	0.00101756	0.0513745	2-oxoglutarate (2OG) and Fe(II)-dependent oxygenase superfamily protein	Belongs to the iron ascorbate-dependent oxidoreductase family	0	0	NA	2OG-FeII_Oxy,DIOX_N	Yes
Within-group	Bulk-R_Infected_vs_Control	MD07G1021500	Chr07	1818742	1821463	-	3.33349	2.07347	7.1174	2.55694e-10	5.44225e-09	13.2245	NAD(P)-binding Rossmann-fold superfamily protein	NA	0	0	NA	NA	Yes
Within-group	Bulk-R_Infected_vs_Control	MD09G1089500	Chr09	6561500	6561986	-	3.33255	-2.04665	5.33	7.19472e-07	4.91477e-06	5.7134	NA	NA	0	0	NA	NA	Yes
Within-group	Bulk-R_Infected_vs_Control	MD17G1061100	Chr17	4956811	4958997	+	3.33186	-0.647589	6.05177	3.21956e-08	3.39392e-07	8.64001	plastid transcription factor 1	Transcription factor	0	0	NA	TCP	No
Within-group	Bulk-R_Infected_vs_Control	MD08G1024500	Chr08	1762855	1765065	+	3.3292	-2.36566	4.00956	0.000125177	0.000445612	0.922737	NA	NA	0	0	NA	NA	No
Within-group	Bulk-R_Infected_vs_Control	MD02G1103400	Chr02	8275329	8276786	+	3.32346	-3.0093	5.39357	5.5101e-07	3.91185e-06	5.9596	RING/U-box superfamily protein	E3 ubiquitin-protein ligase	0	0	NA	IBR,zf-C3HC4	Yes
Within-group	Bulk-R_Infected_vs_Control	MD13G1212000	Chr13	19783672	19784932	+	3.32341	0.0447497	5.66966	1.70228e-07	1.41829e-06	7.04409	2-oxoglutarate (2OG) and Fe(II)-dependent oxygenase superfamily protein	Belongs to the iron ascorbate-dependent oxidoreductase family	0	0	NA	2OG-FeII_Oxy,DIOX_N	No
Within-group	Bulk-R_Infected_vs_Control	MD00G1013300	Chr00	1673173	1679015	-	3.32313	3.8378	7.61773	2.46154e-11	7.24621e-10	15.3416	Glucose-methanol-choline (GMC) oxidoreductase family protein	(R)-mandelonitrile lyase	0	0	ko00460,ko01110,map00460,map01110	GMC_oxred_C,GMC_oxred_N	Yes
Between-groups	Bulk-R_vs_Bulk-S_Infected	MD03G1172200	Chr03	23451216	23455867	-	-3.33407	-0.930956	-5.34439	6.77392e-07	0.00115816	5.50023	ABC-2 type transporter family protein	ABC transporter G family member	0	0	NA	ABC2_membrane,ABC_tran	Yes
Within-group	Bulk-R_Infected_vs_Control	MD10G1032000	Chr10	4124086	4126524	+	3.31982	4.68978	4.8633	4.86469e-06	2.59279e-05	3.25564	Integrase-type DNA-binding superfamily protein	transcription factor	0	0	NA	AP2	Yes
Within-group	Bulk-R_Infected_vs_Control	MD16G1144900	Chr16	11144897	11145673	-	3.31718	2.32693	4.97985	3.04285e-06	1.72072e-05	4.10251	Protein of unknown function	NA	0	0	NA	NA	Yes
Within-group	Bulk-R_Infected_vs_Control	MD14G1239800	Chr14	31887021	31888355	-	3.31611	-0.0120235	4.218	5.85448e-05	0.000229247	1.52942	ARM repeat superfamily protein	RING-type E3 ubiquitin transferase	0	0	NA	U-box	Yes
Within-group	Bulk-R_Infected_vs_Control	MD06G1223300	Chr06	35432164	35439372	-	3.31566	2.59153	4.05485	0.00010633	0.000386465	0.720345	S-adenosyl-L-methionine-dependent methyltransferases superfamily protein	S-adenosylmethionine-dependent methyltransferase	0	0	NA	Methyltransf_7	Yes
Within-group	Bulk-R_Infected_vs_Control	MD12G1161000	Chr12	24081135	24084335	+	3.31535	-0.923216	2.96802	0.00383816	0.00884103	-2.2687	Laccase/Diphenol oxidase family protein	Belongs to the multicopper oxidase family	0	0	NA	Cu-oxidase,Cu-oxidase_2,Cu-oxidase_3	No
Within-group	Bulk-R_Infected_vs_Control	MD01G1077200	Chr01	18377722	18379143	+	3.31427	4.90016	8.38967	6.30707e-13	3.26474e-11	18.8406	UDP-Glycosyltransferase superfamily protein	Belongs to the UDP-glycosyltransferase family	0	0	NA	UDPGT	No
Within-group	Bulk-R_Infected_vs_Control	MD11G1247400	Chr11	35913840	35914628	+	3.31409	2.42726	4.4701	2.26736e-05	9.92607e-05	2.12703	Concanavalin A-like lectin protein kinase family protein	L-type lectin-domain containing receptor kinase	0	0	NA	Lectin_legB	Yes
Within-group	Bulk-R_Infected_vs_Control	MD07G1130700	Chr07	18675084	18675713	-	3.31397	-2.4066	6.24379	1.37282e-08	1.62271e-07	9.42188	Late embryogenesis abundant (LEA) hydroxyproline-rich glycoprotein family	Late embryogenesis abundant protein	0	0	NA	LEA_2	Yes
Within-group	Bulk-R_Infected_vs_Control	MD08G1012300	Chr08	936324	940550	-	3.30579	4.37134	6.78151	1.20422e-09	2.00923e-08	11.4193	Protein of unknown function (DUF668)	Protein of unknown function (DUF668)	0	0	NA	DUF3475,DUF668	Yes
Within-group	Bulk-R_Infected_vs_Control	MD15G1136600	Chr15	10025017	10026934	+	3.30429	6.03486	6.2159	1.55471e-08	1.80409e-07	8.72791	NAC (No Apical Meristem) domain transcriptional regulator superfamily protein	NAC domain-containing protein	0	0	NA	NAM	Yes
Within-group	Bulk-R_Infected_vs_Control	MD15G1410400	Chr15	51018059	51019447	+	3.30297	3.3994	8.43578	5.06036e-13	2.72401e-11	19.205	UDP-Glycosyltransferase superfamily protein	UDP-Glycosyltransferase	0	0	NA	UDPGT	Yes
Within-group	Bulk-R_Infected_vs_Control	MD01G1053300	Chr01	15825543	15827115	+	3.30221	-1.95354	7.89871	6.52462e-12	2.32985e-10	16.6315	NAD(P)-binding Rossmann-fold superfamily protein	Belongs to the short-chain dehydrogenases reductases (SDR) family	0	0	ko00902,ko01110,map00902,map01110	adh_short,adh_short_C2	No
Within-group	Bulk-R_Infected_vs_Control	MD09G1141700	Chr09	11070351	11071802	-	3.3022	7.38318	9.63956	1.57718e-15	2.36226e-13	24.6396	UDP-glucosyl transferase 71B6	Belongs to the UDP-glycosyltransferase family	0	0	NA	UDPGT	Yes
Within-group	Bulk-R_Infected_vs_Control	MD17G1019100	Chr17	1491655	1492245	-	3.29773	-2.7565	5.26443	9.45861e-07	6.2188e-06	5.45792	Protein of unknown function	NA	0	0	NA	NA	Yes
Within-group	Bulk-R_Infected_vs_Control	MD06G1210500	Chr06	34331787	34332284	-	3.29767	1.15593	5.21407	1.16578e-06	7.43743e-06	5.14836	Protein of unknown function	NA	0	0	NA	NA	No
Within-group	Bulk-R_Infected_vs_Control	MD07G1020900	Chr07	1769616	1776499	-	3.29763	-0.257341	6.93826	5.85751e-10	1.09666e-08	12.4569	NAD(P)-binding Rossmann-fold superfamily protein	NA	0	0	NA	NA	Yes
Within-group	Bulk-R_Infected_vs_Control	MD03G1048900	Chr03	3934262	3937799	+	3.29122	2.97493	3.78369	0.000277753	0.000896703	-0.367254	Phototropic-responsive NPH3 family protein	Belongs to the NPH3 family	0	0	NA	BTB,NPH3	No
Within-group	Bulk-R_Infected_vs_Control	MD11G1138800	Chr11	12775131	12779943	-	3.2855	-1.81484	3.86919	0.0002061	0.000688602	0.436536	glycosyltransferase family protein 2	NA	0	0	NA	NA	Yes
Within-group	Bulk-R_Infected_vs_Control	MD05G1246100	Chr05	37759852	37761072	+	3.28549	-2.32695	5.46972	3.99556e-07	2.96819e-06	6.26364	disease resistance family protein / LRR family protein	NA	0	0	NA	NA	No
Within-group	Bulk-R_Infected_vs_Control	MD17G1069100	Chr17	5602020	5602352	-	3.28422	-2.68761	4.05122	0.000107734	0.000390871	1.06629	glutamine dumper 2	NA	0	0	NA	NA	No
Within-group	Bulk-R_Infected_vs_Control	MD09G1077200	Chr09	5429834	5432219	-	3.28371	2.39121	2.99514	0.00354129	0.00823933	-2.49054	Transmembrane amino acid transporter family protein	Sodium-coupled neutral amino acid transporter 4-like	0	0	ko04724,ko04727,ko04974,map04724,map04727,map04974	Aa_trans	No
Within-group	Bulk-R_Infected_vs_Control	MD08G1190600	Chr08	24136626	24137885	+	3.28293	3.39139	6.01274	3.82385e-08	3.93227e-07	8.1789	RING/U-box superfamily protein	RING-H2 finger protein	0	0	NA	zf-RING_2	Yes
Within-group	Bulk-R_Infected_vs_Control	MD07G1177700	Chr07	25719911	25720525	-	3.27995	0.639017	5.13951	1.58584e-06	9.72237e-06	4.8807	Protein of unknown function	NA	0	0	NA	NA	Yes
Within-group	Bulk-R_Infected_vs_Control	MD06G1136300	Chr06	28113716	28114762	+	3.27992	-1.2837	5.48094	3.81008e-07	2.85003e-06	6.30674	PR5-like receptor kinase	NA	0	0	NA	NA	Yes
Within-group	Bulk-R_Infected_vs_Control	MD17G1231800	Chr17	28019872	28025729	+	3.27376	-3.28196	5.68113	1.62028e-07	1.35872e-06	7.09709	senescence-associated gene 12	Belongs to the peptidase C1 family	0	0	NA	Inhibitor_I29,Peptidase_C1	No
Within-group	Bulk-R_Infected_vs_Control	MD07G1211400	Chr07	28995980	28998194	+	3.2727	-0.195858	6.64303	2.26721e-09	3.44684e-08	11.1677	ZCF37	NA	0	0	NA	NA	Yes
Within-group	Bulk-R_Infected_vs_Control	MD15G1160900	Chr15	12074956	12077274	-	3.27025	0.694282	3.93592	0.000162825	0.000560932	0.480015	NA	NA	0	0	NA	NA	No
Within-group	Bulk-R_Infected_vs_Control	MD09G1224500	Chr09	27404228	27406362	-	3.27021	3.17289	5.00145	2.78782e-06	1.59405e-05	4.0489	WRKY DNA-binding protein 40	WRKY transcription factor	0	0	NA	WRKY	Yes
Within-group	Bulk-R_Infected_vs_Control	MD16G1161400	Chr16	13166164	13166959	+	3.26945	0.444078	4.00926	0.000125312	0.000445993	0.789402	MLP-like protein 423	Major allergen Pru	0	0	NA	Bet_v_1	No
Within-group	Bulk-R_Infected_vs_Control	MD05G1074300	Chr05	15664430	15666512	+	3.26899	-1.47369	5.27696	8.97773e-07	5.9457e-06	5.49954	methyl esterase 3	salicylic acid-binding protein 2-like	0	0	NA	Abhydrolase_1,Abhydrolase_6	Yes
Within-group	Bulk-R_Infected_vs_Control	MD03G1204800	Chr03	28100997	28104327	-	3.267	-3.00366	4.08574	9.50731e-05	0.000350319	1.19596	beta glucosidase 15	Belongs to the glycosyl hydrolase 1 family	0	0	ko00460,ko00500,ko00940,ko01100,ko01110,map00460,map00500,map00940,map01100,map01110	Glyco_hydro_1	Yes
Within-group	Bulk-R_Infected_vs_Control	MD10G1335500	Chr10	41245727	41248520	-	3.26581	-0.685991	4.83342	5.48138e-06	2.87739e-05	3.77338	inositol transporter 4	Belongs to the major facilitator superfamily. Sugar transporter (TC 2.A.1.1) family	0	0	NA	Sugar_tr	Yes
Within-group	Bulk-R_Infected_vs_Control	MD12G1239100	Chr12	31193834	31196108	-	3.2649	2.36237	5.21004	1.1854e-06	7.54627e-06	5.00553	NAD(P)-linked oxidoreductase superfamily protein	aldo-keto reductase	0	0	NA	Aldo_ket_red	Yes
Within-group	Bulk-R_Infected_vs_Control	MD14G1041600	Chr14	3947438	3947947	+	3.2636	-1.95467	6.49722	4.39512e-09	6.10786e-08	10.5056	RING/U-box superfamily protein	RING-H2 finger protein	0	0	NA	zf-RING_2	No
Within-group	Bulk-R_Infected_vs_Control	MD10G1277600	Chr10	36833050	36836764	+	3.25962	-2.14383	4.56129	1.59665e-05	7.303e-05	2.82199	Leucine-rich repeat protein kinase family protein	LRR receptor-like serine threonine-protein kinase	0	0	ko04010,ko04016,ko04064,ko04620,ko04621,ko04624,ko04626,ko04722,ko05133,ko05140,ko05142,ko05145,ko05152,ko05162,ko05164,ko05169,map04010,map04016,map04064,map04620,map04621,map04624,map04626,map04722,map05133,map05140,map05142,map05145,map05152,map05162,map05164,map05169	LRRNT_2,LRR_1,LRR_8,Pkinase,Pkinase_Tyr	No
Within-group	Bulk-R_Infected_vs_Control	MD02G1317300	Chr02	37149127	37149842	-	3.25818	-0.17669	4.21366	5.9493e-05	0.000232538	1.51072	NA	NA	0	0	NA	NA	Yes
Within-group	Bulk-R_Infected_vs_Control	MD02G1133900	Chr02	10836759	10837079	+	3.25533	-3.15564	4.00381	0.000127788	0.000453907	0.922147	SAUR-like auxin-responsive protein family	auxin-induced protein	0	0	ko04075,map04075	Auxin_inducible	Yes
Within-group	Bulk-R_Infected_vs_Control	MD09G1292300	Chr09	37499242	37500237	-	3.25444	-2.49888	4.07698	9.8143e-05	0.000360359	1.15256	RAD-like 6	SANT SWI3, ADA2, N-CoR and TFIIIB'' DNA-binding domains	0	0	NA	Myb_DNA-binding	No
Within-group	Bulk-R_Infected_vs_Control	MD11G1308100	Chr11	42201105	42201569	+	3.25424	3.33913	7.5127	4.03436e-11	1.1146e-09	14.9288	Protein of unknown function	Protein of unknown function, DUF538	0	0	NA	DUF538	Yes
Within-group	Bulk-R_Infected_vs_Control	MD17G1064400	Chr17	5220009	5220953	+	3.25422	1.05599	2.36278	0.0202885	0.0376295	-3.9442	B12D protein	NADH-ubiquinone reductase complex 1 MLRQ subunit	0	0	NA	B12D	Yes
Within-group	Bulk-R_Infected_vs_Control	MD10G1184100	Chr10	27718674	27720425	-	3.24937	0.466462	4.99201	2.89657e-06	1.64663e-05	4.32714	myb domain protein 15	Myb-related protein	0	0	NA	Myb_DNA-binding	No
Within-group	Bulk-R_Infected_vs_Control	MD05G1327800	Chr05	45337750	45340016	+	3.2485	0.209997	5.84596	7.93719e-08	7.35349e-07	7.75906	S-locus lectin protein kinase family protein	serine threonine-protein kinase	0	0	NA	B_lectin,DUF3403,PAN_2,Pkinase,Pkinase_Tyr,S_locus_glycop	No
Within-group	Bulk-R_Infected_vs_Control	MD08G1183900	Chr08	22917700	22921068	+	3.24638	4.07937	7.05688	3.38545e-10	6.8665e-09	12.7434	alpha/beta-Hydrolases superfamily protein	Monoacylglycerol lipase	0	0	NA	Abhydrolase_1,Abhydrolase_4	Yes
Within-group	Bulk-R_Infected_vs_Control	MD12G1239000	Chr12	31187659	31190011	-	3.24514	2.76574	3.46357	0.000817522	0.00230669	-1.28811	NAD(P)-linked oxidoreductase superfamily protein	aldo-keto reductase	0	0	NA	Aldo_ket_red	Yes
Within-group	Bulk-R_Infected_vs_Control	MD15G1219000	Chr15	17706756	17708679	+	3.24465	1.38474	3.04549	0.00304568	0.00721964	-2.26579	Protein of unknown function (DUF567)	LURP-one-related 6-like	0	0	NA	LOR	No
Within-group	Bulk-R_Infected_vs_Control	MD10G1223300	Chr10	32142388	32143712	-	3.24389	-2.95166	3.27984	0.00147719	0.00385403	-1.31347	NA	NA	0	0	NA	NA	Yes
Within-group	Bulk-R_Infected_vs_Control	MD13G1106800	Chr13	7657808	7658620	+	3.24326	0.826603	3.35167	0.00117511	0.003156	-1.34919	S-adenosyl-L-methionine-dependent methyltransferases superfamily protein	Methyltransferase domain	0	0	NA	Methyltransf_11	Yes
Within-group	Bulk-R_Infected_vs_Control	MD02G1170500	Chr02	14751981	14756101	-	3.24211	0.96266	4.30974	4.16067e-05	0.00017	1.77444	Protein of unknown function	membrane	0	0	NA	NA	Yes
Within-group	Bulk-R_Infected_vs_Control	MD11G1146800	Chr11	13816349	13818924	-	3.24197	3.27095	5.34221	6.83618e-07	4.70623e-06	5.42741	Exostosin family protein	glucuronoxylan glucuronosyltransferase	0	0	NA	Exostosin	No
Within-group	Bulk-R_Infected_vs_Control	MD17G1130000	Chr17	11443839	11444380	-	-3.13663	0.901458	-3.5634	0.000587645	0.00172753	-0.748586	NA	NA	1	0	NA	NA	No
Within-group	Bulk-R_Infected_vs_Control	MD15G1366700	Chr15	44596618	44597874	+	3.24029	0.832023	6.35133	8.48246e-09	1.0678e-07	9.8961	VQ motif-containing protein	VQ motif-containing protein	0	0	NA	VQ	No
Within-group	Bulk-R_Infected_vs_Control	MD02G1066500	Chr02	5425904	5430494	-	3.23915	5.62871	8.44223	4.90676e-13	2.64573e-11	18.9958	hexokinase 2	Belongs to the hexokinase family	0	0	ko00010,ko00051,ko00052,ko00500,ko00520,ko00521,ko00524,ko01100,ko01110,ko01120,ko01130,ko01200,ko04066,ko04910,ko04930,ko04973,ko05230,map00010,map00051,map00052,map00500,map00520,map00521,map00524,map01100,map01110,map01120,map01130,map01200,map04066,map04910,map04930,map04973,map05230	Hexokinase_1,Hexokinase_2	Yes
Within-group	Bulk-R_Infected_vs_Control	MD15G1224100	Chr15	18224599	18225867	+	3.23751	-2.74274	5.66393	1.74472e-07	1.44954e-06	7.03396	RING/U-box superfamily protein	In Between Ring fingers	0	0	NA	IBR	Yes
Within-group	Bulk-R_Infected_vs_Control	MD01G1172100	Chr01	27436542	27439699	-	3.23658	-1.2168	6.33764	9.02007e-09	1.1254e-07	9.84454	disease resistance family protein / LRR family protein	LRR receptor-like serine threonine-protein kinase	0	0	NA	LRRNT_2,LRR_1,LRR_6,LRR_8	No
Within-group	Bulk-R_Infected_vs_Control	MD11G1196300	Chr11	28120653	28122077	+	3.23404	1.89772	5.77806	1.06605e-07	9.43609e-07	7.39564	scarecrow-like 3	Belongs to the GRAS family	0	0	NA	GRAS	Yes
Within-group	Bulk-R_Infected_vs_Control	MD15G1409900	Chr15	50962933	50964039	+	3.22922	-2.81557	3.09637	0.00261079	0.00630755	-1.82415	structural constituent of ribosome	Fantastic Four meristem regulator	0	0	NA	FAF	No
Within-group	Bulk-R_Infected_vs_Control	MD14G1036500	Chr14	3311141	3315590	-	3.22769	-3.54837	5.44861	4.36883e-07	3.19413e-06	6.17019	Putative lysine decarboxylase family protein	Cytokinin-activating enzyme working in the direct activation pathway. Phosphoribohydrolase that converts inactive cytokinin nucleotides to the biologically active free-base forms	0	0	NA	Lysine_decarbox	Yes
Within-group	Bulk-R_Infected_vs_Control	MD14G1168600	Chr14	26176740	26178419	-	3.2262	5.52523	9.32747	7.05071e-15	8.03185e-13	23.2066	cytochrome P450	Cytochrome p450	0	0	NA	p450	Yes
Within-group	Bulk-R_Infected_vs_Control	MD04G1061700	Chr04	8152588	8153553	-	3.22479	-2.74975	4.08581	9.50499e-05	0.000350314	1.18736	Protein kinase superfamily protein	Belongs to the protein kinase superfamily	0	0	NA	Pkinase	Yes
Within-group	Bulk-R_Infected_vs_Control	MD14G1162100	Chr14	25655961	25657871	-	3.22371	-1.30563	3.42564	0.00092531	0.00256892	-0.989999	Protein of unknown function	NA	0	0	NA	NA	Yes
Within-group	Bulk-R_Infected_vs_Control	MD15G1330200	Chr15	36359897	36360373	-	3.22128	-1.31203	5.20836	1.19368e-06	7.59151e-06	5.22525	RING/U-box superfamily protein	E3 ubiquitin-protein ligase	0	0	NA	zf-RING_2	Yes
Within-group	Bulk-R_Infected_vs_Control	MD04G1117800	Chr04	20282707	20284694	-	3.21925	1.20301	4.27694	4.70324e-05	0.000189159	1.60812	exocyst subunit exo70 family protein H4	exocyst complex component	0	0	ko04910,map04910	Exo70	No
Within-group	Bulk-R_Infected_vs_Control	MD06G1223900	Chr06	35459918	35460536	-	3.21903	-3.19252	4.90517	4.11283e-06	2.23749e-05	4.09262	NA	NA	0	0	NA	NA	No
Within-group	Bulk-R_Infected_vs_Control	MD09G1219100	Chr09	22394117	22398311	+	3.21747	5.0597	5.07705	2.04885e-06	1.21489e-05	4.04799	HCO3 -transporter family	Boron transporter	0	0	NA	HCO3_cotransp	Yes
Within-group	Bulk-R_Infected_vs_Control	MD09G1276300	Chr09	35359458	35366901	-	3.21672	4.67507	6.6628	2.07194e-09	3.21032e-08	10.847	glutamate decarboxylase	Belongs to the group II decarboxylase family	0	0	ko00250,ko00410,ko00430,ko00650,ko01100,ko01110,ko01120,ko02024,ko04727,ko04940,map00250,map00410,map00430,map00650,map01100,map01110,map01120,map02024,map04727,map04940	Pyridoxal_deC	Yes
Within-group	Bulk-R_Infected_vs_Control	MD03G1144700	Chr03	15607935	15609834	-	3.2165	-1.01317	4.77563	6.89742e-06	3.49703e-05	3.57234	Calcium-binding EF-hand family protein	calcium-binding protein	0	0	ko04626,map04626	EF-hand_1,EF-hand_5,EF-hand_6	Yes
Within-group	Bulk-R_Infected_vs_Control	MD07G1111800	Chr07	12958022	12959433	-	3.21432	3.05435	6.29341	1.09976e-08	1.32957e-07	9.45697	Protein of unknown function	BEST Arabidopsis thaliana protein match is	0	0	NA	NA	No
Within-group	Bulk-R_Infected_vs_Control	MD10G1045600	Chr10	6108737	6123464	+	3.20725	-0.0201907	4.04499	0.000110187	0.000398476	0.953128	Protein of unknown function (DUF668)	Domain of unknown function (DUF3475)	0	0	ko03013,ko03015,ko03040,ko05164,map03013,map03015,map03040,map05164	DUF3475,DUF668	No
Within-group	Bulk-R_Infected_vs_Control	MD13G1222600	Chr13	21570860	21571943	-	3.20361	-2.68343	6.19729	1.68905e-08	1.93774e-07	9.22291	isopropyl malate isomerase large subunit 1	3-isopropylmalate	0	0	ko00290,ko00660,ko00966,ko01100,ko01110,ko01210,ko01230,map00290,map00660,map00966,map01100,map01110,map01210,map01230	Aconitase	Yes
Within-group	Bulk-R_Infected_vs_Control	MD11G1112000	Chr11	9903456	9911792	-	3.20339	-1.41505	3.02387	0.00325003	0.00764779	-2.06752	NA	NA	0	0	NA	NA	No
Within-group	Bulk-R_Infected_vs_Control	MD09G1190800	Chr09	16671079	16673550	+	3.20188	-2.88825	3.76511	0.000296194	0.000947821	0.155473	calmodulin-binding family protein	Short calmodulin-binding motif containing conserved Ile and Gln residues.	0	0	NA	NA	Yes
Within-group	Bulk-R_Infected_vs_Control	MD05G1349100	Chr05	46713491	46714747	-	3.20005	-3.14524	4.37111	3.30301e-05	0.00013858	2.17246	F-box family protein with a domain of unknown function (DUF295)	f-box protein	0	0	NA	Chloroplast_duf	Yes
Within-group	Bulk-R_Infected_vs_Control	MD01G1173100	Chr01	27498373	27499484	-	3.19511	-2.42648	7.32795	9.589e-11	2.35018e-09	14.0867	Pectin lyase-like superfamily protein	Pectinesterase	0	0	ko00040,ko01100,map00040,map01100	Pectinesterase	No
Within-group	Bulk-R_Infected_vs_Control	MD01G1220800	Chr01	31286401	31291940	+	3.19018	2.34208	3.17638	0.00204209	0.00510603	-2.05854	highly ABA-induced PP2C gene 3	phosphatase 2c	0	0	ko04016,ko04075,ko04931,map04016,map04075,map04931	PP2C	Yes
Within-group	Bulk-R_Infected_vs_Control	MD02G1028300	Chr02	2171595	2172664	-	3.18835	0.668551	4.45327	2.41795e-05	0.000105057	2.29009	blue-copper-binding protein	Plastocyanin-like domain	0	0	NA	Cu_bind_like	Yes
Within-group	Bulk-R_Infected_vs_Control	MD04G1147700	Chr04	23574217	23577411	+	3.18833	-0.649875	2.76647	0.00687441	0.0147081	-2.81293	Laccase/Diphenol oxidase family protein	Belongs to the multicopper oxidase family	0	0	NA	Cu-oxidase,Cu-oxidase_2,Cu-oxidase_3	No
Within-group	Bulk-R_Infected_vs_Control	MD03G1082600	Chr03	6690831	6691304	+	3.18713	-1.48161	4.26395	4.93669e-05	0.000197419	1.75298	Ctr copper transporter family	Copper transporter	0	0	ko01524,ko04978,map01524,map04978	Ctr	No
Within-group	Bulk-R_Infected_vs_Control	MD10G1062300	Chr10	8403348	8407079	-	3.18549	5.01306	3.69043	0.000382777	0.00118572	-0.959894	NAD(P)-linked oxidoreductase superfamily protein	NADP-dependent D-sorbitol-6-phosphate dehydrogenase-like	0	0	ko00010,ko00040,ko00051,ko00052,ko00561,ko00790,ko00930,ko01100,ko01110,ko01120,ko01130,ko01220,map00010,map00040,map00051,map00052,map00561,map00790,map00930,map01100,map01110,map01120,map01130,map01220	Aldo_ket_red	No
Within-group	Bulk-R_Infected_vs_Control	MD08G1100500	Chr08	8442269	8446188	+	3.1854	-3.00609	3.32616	0.00127506	0.00338608	-1.17342	phospholipase A 2A	Lipolytic acyl hydrolase (LAH)	0	0	NA	Patatin	No
Within-group	Bulk-R_Infected_vs_Control	MD15G1003500	Chr15	204321	207372	+	3.18535	4.96843	5.76571	1.12463e-07	9.887e-07	6.86029	OPC-8:0 CoA ligase1	4-coumarate--CoA ligase-like	0	0	ko00592,ko01100,ko01110,map00592,map01100,map01110	AMP-binding,AMP-binding_C	Yes
Within-group	Bulk-R_Infected_vs_Control	MD02G1062300	Chr02	5006369	5006551	+	3.17918	1.02504	5.78959	1.01409e-07	9.06544e-07	7.47353	ROTUNDIFOLIA like 12	NA	0	0	NA	NA	Yes
Within-group	Bulk-R_Infected_vs_Control	MD11G1277800	Chr11	39490681	39491670	+	3.17728	-1.12119	5.52561	3.152e-07	2.43026e-06	6.48236	calmodulin 8	Calmodulin-like protein	0	0	ko04014,ko04015,ko04016,ko04020,ko04022,ko04024,ko04070,ko04114,ko04218,ko04261,ko04270,ko04371,ko04626,ko04713,ko04720,ko04722,ko04728,ko04740,ko04744,ko04745,ko04750,ko04910,ko04912,ko04915,ko04916,ko04921,ko04922,ko04924,ko04925,ko04970,ko04971,ko05010,ko05031,ko05034,ko05133,ko05152,ko05167,ko05200,ko05214,ko05418,map04014,map04015,map04016,map04020,map04022,map04024,map04070,map04114,map0421…	EF-hand_1,EF-hand_5,EF-hand_7,EF-hand_8	Yes
Within-group	Bulk-R_Infected_vs_Control	MD11G1313800	Chr11	42604340	42611957	-	3.1748	0.753733	4.23058	5.58813e-05	0.00021995	1.46579	multidrug resistance-associated protein 4	ABC transporter C family member	0	0	ko01523,ko01524,ko02010,ko04071,ko04976,ko04977,ko05206,map01523,map01524,map02010,map04071,map04976,map04977,map05206	ABC_membrane,ABC_tran	No
Within-group	Bulk-R_Infected_vs_Control	MD17G1060600	Chr17	4917406	4918797	-	3.17443	0.762091	6.29165	1.10846e-08	1.3378e-07	9.6312	HXXXD-type acyl-transferase family protein	phenolic glucoside malonyltransferase	0	0	ko00330,ko00943,ko00944,map00330,map00943,map00944	Transferase	No
Within-group	Bulk-R_Infected_vs_Control	MD15G1188100	Chr15	14837843	14842536	+	3.17249	-2.63243	3.65278	0.000435064	0.0013251	-0.218309	sulfate transporter 3	Sulfate transporter	0	0	NA	STAS,Sulfate_transp	No
Within-group	Bulk-R_Infected_vs_Control	MD15G1283700	Chr15	25644254	25647387	-	3.17096	7.18494	9.84328	5.93935e-16	1.04429e-13	25.6104	heat shock factor 4	heat shock factor protein	0	0	NA	HSF_DNA-bind	Yes
Within-group	Bulk-R_Infected_vs_Control	MD16G1010900	Chr16	834248	835727	-	3.17004	2.1248	5.09451	1.90758e-06	1.13906e-05	4.55618	Lactate/malate dehydrogenase family protein	Belongs to the LDH MDH superfamily	0	0	ko00010,ko00270,ko00620,ko00640,ko01100,ko01110,ko01120,ko01130,ko04922,map00010,map00270,map00620,map00640,map01100,map01110,map01120,map01130,map04922	Ldh_1_C,Ldh_1_N	Yes
Within-group	Bulk-R_Infected_vs_Control	MD00G1117000	Chr00	24815722	24817459	-	3.16881	-1.7903	4.72077	8.5673e-06	4.24325e-05	3.39319	NAC 007	NAC domain-containing protein	0	0	NA	NAM	No
Within-group	Bulk-R_Infected_vs_Control	MD01G1052800	Chr01	15796742	15798817	+	3.16663	5.59048	8.96649	3.98539e-14	3.25595e-12	21.4774	NAD(P)-binding Rossmann-fold superfamily protein	Enoyl-(Acyl carrier protein) reductase	0	0	ko00902,ko01110,map00902,map01110	adh_short,adh_short_C2	Yes
Within-group	Bulk-R_Infected_vs_Control	MD02G1138600	Chr02	11590586	11592770	+	3.16567	4.18766	8.68066	1.56834e-13	1.0048e-11	20.2647	alpha/beta-Hydrolases superfamily protein	Bifunctional epoxide hydrolase 2-like	0	0	NA	Abhydrolase_1	Yes
Within-group	Bulk-R_Infected_vs_Control	MD14G1202500	Chr14	29107600	29108360	+	3.1639	3.66048	9.10082	2.09218e-14	1.95061e-12	22.3343	NA	Thioredoxin-like 1-2, chloroplastic	0	0	NA	Thioredoxin	Yes
Within-group	Bulk-R_Infected_vs_Control	MD04G1067600	Chr04	9061182	9062705	-	3.1633	-2.82234	5.23579	1.0654e-06	6.87432e-06	5.34691	MATE efflux family protein	Belongs to the multi antimicrobial extrusion (MATE) (TC 2.A.66.1) family	0	0	NA	MatE	Yes
Within-group	Bulk-R_Infected_vs_Control	MD17G1232200	Chr17	28054026	28055169	+	3.1625	-3.26345	5.62617	2.05172e-07	1.66735e-06	6.8771	senescence-associated gene 12	Belongs to the peptidase C1 family	0	0	NA	Inhibitor_I29,Peptidase_C1	No
Within-group	Bulk-R_Infected_vs_Control	MD03G1019500	Chr03	1496758	1499090	+	3.15974	4.94765	7.8578	7.91981e-12	2.74916e-10	16.2903	receptor-like protein kinase 1	G-type lectin S-receptor-like serine threonine-protein kinase	0	0	NA	B_lectin,PAN_2,Pkinase,Pkinase_Tyr,S_locus_glycop	Yes
Within-group	Bulk-R_Infected_vs_Control	MD17G1016400	Chr17	1323367	1326220	-	3.15902	2.32978	3.20102	0.00189168	0.00478021	-1.95553	alpha/beta-Hydrolases superfamily protein	Bifunctional epoxide hydrolase 2-like	0	0	NA	Abhydrolase_1,Abhydrolase_6	No
Within-group	Bulk-R_Infected_vs_Control	MD15G1377900	Chr15	46333806	46335074	+	3.15609	1.52832	5.72476	1.34251e-07	1.1539e-06	7.20111	RING/U-box superfamily protein	RING-H2 finger protein	0	0	NA	zf-RING_2	Yes
Within-group	Bulk-R_Infected_vs_Control	MD10G1017300	Chr10	2215926	2218198	+	3.15358	0.421236	2.92708	0.00433019	0.00982813	-2.48546	pathogenesis-related family protein	Pathogen-related protein-like	0	0	NA	NA	No
Within-group	Bulk-R_Infected_vs_Control	MD17G1218000	Chr17	26497934	26498506	-	3.15355	-2.73821	4.15901	7.27599e-05	0.0002774	1.42654	serine-rich protein-related	NA	0	0	NA	NA	Yes
Within-group	Bulk-R_Infected_vs_Control	MD13G1210900	Chr13	19649492	19652258	+	3.15092	4.78698	7.80249	1.029e-11	3.44263e-10	16.0379	2-oxoglutarate (2OG) and Fe(II)-dependent oxygenase superfamily protein	Belongs to the iron ascorbate-dependent oxidoreductase family	0	0	NA	2OG-FeII_Oxy,DIOX_N	Yes
Within-group	Bulk-R_Infected_vs_Control	MD13G1160500	Chr13	12600061	12606555	+	3.14997	7.43627	5.29693	8.26081e-07	5.52977e-06	4.80032	NA	NA	0	0	NA	NA	Yes
Within-group	Bulk-R_Infected_vs_Control	MD13G1181200	Chr13	15095770	15097839	-	3.14864	2.80519	5.13787	1.59663e-06	9.77927e-06	4.6746	alpha/beta-Hydrolases superfamily protein	1,4-beta-D-glucanase-like	0	0	ko00361,ko00364,ko00623,ko01100,ko01110,ko01120,ko01130,map00361,map00364,map00623,map01100,map01110,map01120,map01130	DLH	Yes
Within-group	Bulk-R_Infected_vs_Control	MD02G1079200	Chr02	6232948	6238819	+	3.14412	8.51912	6.21518	1.55967e-08	1.80919e-07	8.69449	beta-galactosidase 12	beta-galactosidase	0	0	NA	Gal_Lectin,Glyco_hydro_35	No
Within-group	Bulk-R_Infected_vs_Control	MD04G1140500	Chr04	22887712	22888089	-	3.14047	-2.87027	5.38983	5.59747e-07	3.96517e-06	5.94526	copper transporter 2	Copper transporter	0	0	ko01524,ko04978,map01524,map04978	Ctr	No
Within-group	Bulk-R_Infected_vs_Control	MD03G1130100	Chr03	12772747	12778850	+	3.13825	-2.05683	4.09309	9.25663e-05	0.000342448	1.1855	Serine carboxypeptidase S28 family protein	Lysosomal Pro-X	0	0	ko04614,ko04974,map04614,map04974	Peptidase_S28	Yes
Within-group	Bulk-R_Infected_vs_Control	MD06G1109200	Chr06	24877949	24881781	-	3.13712	-2.46574	5.66219	1.75786e-07	1.45821e-06	7.02971	calcineurin B-like protein 8	Calcineurin B-like protein	0	0	ko04010,ko04020,ko04022,ko04114,ko04218,ko04310,ko04360,ko04370,ko04380,ko04650,ko04658,ko04659,ko04660,ko04662,ko04720,ko04724,ko04921,ko04922,ko04924,ko05010,ko05014,ko05031,ko05152,ko05166,ko05167,map04010,map04020,map04022,map04114,map04218,map04310,map04360,map04370,map04380,map04650,map04658,map04659,map04660,map04662,map04720,map04724,map04921,map04922,map04924,map05010,map05014,map05031,m…	EF-hand_1,EF-hand_5,EF-hand_6,EF-hand_7,EF-hand_8	Yes
Within-group	Bulk-R_Infected_vs_Control	MD12G1003700	Chr12	549515	550423	+	3.13667	0.888481	5.64605	1.88403e-07	1.54684e-06	6.90571	Methyltransferase-related protein	NA	0	0	NA	NA	Yes
Within-group	Bulk-R_Infected_vs_Control	MD01G1077400	Chr01	18412910	18415367	+	3.13651	-2.21645	3.83311	0.000233872	0.000770255	0.351962	NAD(P)-binding Rossmann-fold superfamily protein	NAD(P)H-binding	0	0	NA	3Beta_HSD,Epimerase	No
Within-group	Bulk-R_Infected_vs_Control	MD13G1085600	Chr13	6012141	6021594	+	3.13299	1.3011	4.12377	8.27788e-05	0.000310536	1.05375	NA	protection from non-homologous end joining at telomere	0	0	NA	NA	Yes
Within-group	Bulk-R_Infected_vs_Control	MD05G1331400	Chr05	45538638	45542118	+	3.13272	-1.61483	5.04699	2.31638e-06	1.35417e-05	4.61109	S-locus lectin protein kinase family protein	NA	0	0	NA	NA	No
Within-group	Bulk-R_Infected_vs_Control	MD03G1052000	Chr03	4145699	4146040	-	3.13214	-2.84312	4.45471	2.40468e-05	0.000104551	2.44961	lipid transfer protein 1	NA	0	0	NA	NA	No
Within-group	Bulk-R_Infected_vs_Control	MD17G1223100	Chr17	27209201	27211741	+	3.13186	3.55781	4.35853	3.46359e-05	0.000144604	1.53758	WRKY DNA-binding protein 40	WRKY transcription factor	0	0	NA	WRKY	Yes
Within-group	Bulk-R_Infected_vs_Control	MD17G1134400	Chr17	12049725	12051915	+	3.13169	-1.63973	4.96196	3.27139e-06	1.83107e-05	4.28849	NAC domain containing protein 42	Transcription factor JUNGBRUNNEN 1-like	0	0	NA	NAM	Yes
Within-group	Bulk-R_Infected_vs_Control	MD05G1135300	Chr05	26346834	26347583	-	3.12986	-0.578049	3.35422	0.00116553	0.00313312	-1.27166	Plant EC metallothionein-like protein	NA	0	0	NA	NA	No
Within-group	Bulk-R_Infected_vs_Control	MD03G1129900	Chr03	12688322	12701247	+	3.12931	-1.69471	4.21069	6.01491e-05	0.000234677	1.57817	Serine carboxypeptidase S28 family protein	Lysosomal Pro-X	0	0	ko04614,ko04974,map04614,map04974	Peptidase_S28	No
Within-group	Bulk-R_Infected_vs_Control	MD03G1133300	Chr03	13280438	13300479	-	3.12918	3.27293	8.09893	2.52154e-12	1.02742e-10	17.6428	Transmembrane amino acid transporter family protein	Transporter	0	0	NA	Aa_trans	Yes
Within-group	Bulk-R_Infected_vs_Control	MD12G1110500	Chr12	17457716	17459639	+	3.12603	-0.115437	5.34401	6.78464e-07	4.68109e-06	5.7252	myb domain protein 36	SANT SWI3, ADA2, N-CoR and TFIIIB'' DNA-binding domains	0	0	NA	Myb_DNA-binding	No
Within-group	Bulk-R_Infected_vs_Control	MD03G1106500	Chr03	9173753	9177492	+	3.12501	-2.48658	3.17591	0.00204506	0.00511138	-1.60379	laccase 17	Lignin degradation and detoxification of lignin-derived products	0	0	NA	Cu-oxidase,Cu-oxidase_2,Cu-oxidase_3	No
Within-group	Bulk-R_Infected_vs_Control	MD11G1288100	Chr11	40784120	40785217	-	3.12074	-1.90061	6.18975	1.74668e-08	1.99395e-07	9.21033	Phenazine biosynthesis PhzC/PhzF protein	Phenazine biosynthesis-like domain-containing protein	0	0	NA	PhzC-PhzF	Yes
Within-group	Bulk-R_Infected_vs_Control	MD03G1034800	Chr03	2798520	2800896	+	3.11988	2.82916	3.84642	0.000223234	0.000738558	-0.0645682	RING/U-box superfamily protein	E3 ubiquitin-protein ligase	0	0	NA	zf-RING_11,zf-RING_2	Yes
Within-group	Bulk-R_Infected_vs_Control	MD01G1186500	Chr01	28517385	28520196	+	3.11575	1.68623	7.61	2.55274e-11	7.48742e-10	15.4814	NB-ARC domain-containing disease resistance protein	Belongs to the disease resistance NB-LRR family	0	0	ko04626,map04626	NB-ARC	Yes
Within-group	Bulk-R_Infected_vs_Control	MD05G1197600	Chr05	32455785	32457548	-	3.11486	2.312	3.84037	0.000228016	0.000752731	-0.0612223	myb domain protein 14	Myb-related protein	0	0	NA	Myb_DNA-binding	Yes
Within-group	Bulk-R_Infected_vs_Control	MD12G1228800	Chr12	30437605	30442385	-	3.11386	5.05495	7.51627	3.96731e-11	1.10078e-09	14.7049	dehydroquinate dehydratase	Bifunctional 3-dehydroquinate dehydratase shikimate dehydrogenase, chloroplastic-like	0	0	ko00400,ko01100,ko01110,ko01130,ko01230,map00400,map01100,map01110,map01130,map01230	DHquinase_I,Shikimate_DH,Shikimate_dh_N	No
Within-group	Bulk-R_Infected_vs_Control	MD05G1348200	Chr05	46671614	46674373	+	3.11086	7.21206	7.57673	2.98567e-11	8.51784e-10	14.8563	APS reductase 3	5'-adenylylsulfate reductase	0	0	ko00920,ko01120,map00920,map01120	PAPS_reduct,Thioredoxin	Yes
Within-group	Bulk-R_Infected_vs_Control	MD06G1181300	Chr06	32062106	32062354	+	3.11055	-0.0665407	6.79626	1.12546e-09	1.8968e-08	11.8391	Protein of unknown function	NA	0	0	NA	NA	No
Within-group	Bulk-R_Infected_vs_Control	MD07G1176700	Chr07	25596719	25597407	+	3.11029	1.13909	8.35286	7.51908e-13	3.75397e-11	18.8947	NA	NA	0	0	NA	NA	No
Within-group	Bulk-R_Infected_vs_Control	MD02G1102600	Chr02	8225074	8227220	-	3.10917	-2.00868	3.78656	0.000275001	0.000888883	0.178348	GDSL-motif lipase 5	Belongs to the 'GDSL' lipolytic enzyme family	0	0	NA	Lipase_GDSL	No
Within-group	Bulk-R_Infected_vs_Control	MD09G1052700	Chr09	3508790	3509419	+	3.1091	1.78928	2.86756	0.00514973	0.0114371	-2.85299	Calcium-binding EF-hand family protein	calcium-binding protein	0	0	ko04014,ko04015,ko04016,ko04020,ko04022,ko04024,ko04070,ko04114,ko04218,ko04261,ko04270,ko04371,ko04626,ko04713,ko04720,ko04722,ko04728,ko04740,ko04744,ko04745,ko04750,ko04910,ko04912,ko04915,ko04916,ko04921,ko04922,ko04924,ko04925,ko04970,ko04971,ko05010,ko05031,ko05034,ko05133,ko05152,ko05167,ko05200,ko05214,ko05418,map04014,map04015,map04016,map04020,map04022,map04024,map04070,map04114,map0421…	EF-hand_1,EF-hand_5,EF-hand_6,EF-hand_7	Yes
Within-group	Bulk-R_Infected_vs_Control	MD16G1035500	Chr16	2553901	2554413	+	3.10869	2.85876	4.58468	1.45837e-05	6.74692e-05	2.45132	RING-H2 finger A2A	E3 ubiquitin-protein ligase	0	0	NA	zf-RING_2	No
Within-group	Bulk-R_Infected_vs_Control	MD10G1021400	Chr10	2672520	2675357	+	3.10798	2.82093	6.24795	1.3476e-08	1.59523e-07	9.22457	plant U-box 29	RING-type E3 ubiquitin transferase	0	0	NA	U-box	Yes
Within-group	Bulk-R_Infected_vs_Control	MD05G1297900	Chr05	43156220	43157572	+	3.1052	-3.33505	4.75337	7.53292e-06	3.78559e-05	3.53377	EF-TU receptor	LRR receptor-like serine threonine-protein kinase	0	0	ko04016,ko04626,map04016,map04626	LRRNT_2,LRR_1,LRR_8	Yes
Within-group	Bulk-R_Infected_vs_Control	MD11G1172500	Chr11	19112973	19113548	-	3.09701	-1.04515	6.69051	1.82589e-09	2.88574e-08	11.3637	ovate family protein 6	Transcription repressor	0	0	NA	Ovate	No
Within-group	Bulk-R_Infected_vs_Control	MD15G1415100	Chr15	51557724	51562397	+	3.0964	1.08705	5.46172	4.13317e-07	3.04524e-06	6.13943	cellulose synthase like G2	Belongs to the glycosyltransferase 2 family	0	0	NA	Cellulose_synt	Yes
Within-group	Bulk-R_Infected_vs_Control	MD09G1132600	Chr09	10176133	10183600	-	3.09609	2.20468	4.58865	1.43612e-05	6.65252e-05	2.63757	Subtilisin-like serine endopeptidase family protein	subtilisin-like protease	0	0	NA	Inhibitor_I9,PA,Peptidase_S8	No
Within-group	Bulk-R_Infected_vs_Control	MD15G1082100	Chr15	5628730	5632017	+	3.09251	-2.70698	6.02242	3.66439e-08	3.79118e-07	8.49375	glutamate receptor 2.7	Belongs to the glutamate-gated ion channel (TC 1.A.10.1) family	0	0	NA	ANF_receptor,Lig_chan,SBP_bac_3	Yes
Within-group	Bulk-R_Infected_vs_Control	MD11G1148000	Chr11	13964452	13967815	+	3.08922	1.5319	6.28075	1.16388e-08	1.39821e-07	9.54325	MATE efflux family protein	Belongs to the multi antimicrobial extrusion (MATE) (TC 2.A.66.1) family	0	0	NA	MatE	Yes
Within-group	Bulk-R_Infected_vs_Control	MD02G1181800	Chr02	16368470	16368748	-	3.08831	-3.11607	3.48775	0.000755113	0.00215275	-0.690379	Late embryogenesis abundant protein	Late embryogenesis abundant protein 18	0	0	NA	LEA_6	No
Within-group	Bulk-R_Infected_vs_Control	MD14G1226200	Chr14	30730368	30731108	-	3.08782	4.82315	7.26976	1.25829e-10	2.96707e-09	13.5805	Protein of unknown function	protein kinase activity	0	0	NA	NA	No
Within-group	Bulk-R_Infected_vs_Control	MD13G1113000	Chr13	8211021	8212952	+	3.08707	4.19529	9.6138	1.78465e-15	2.58911e-13	24.6939	cytochrome P450	Belongs to the cytochrome P450 family	0	0	NA	p450	Yes
Within-group	Bulk-R_Infected_vs_Control	MD00G1104700	Chr00	21970709	21972003	-	3.08601	-0.398345	4.17772	6.79254e-05	0.000260926	1.36865	myb domain protein 42	Myb-like DNA-binding domain	0	0	NA	Myb_DNA-binding	Yes
Within-group	Bulk-R_Infected_vs_Control	MD02G1034700	Chr02	2656742	2659474	-	3.08557	4.4126	5.74129	1.24997e-07	1.08591e-06	6.85808	Protein of unknown function	NA	0	0	NA	NA	Yes
Within-group	Bulk-R_Infected_vs_Control	MD11G1098800	Chr11	8205492	8215189	-	3.08555	-0.655152	5.84569	7.9467e-08	7.35876e-07	7.78384	NA	NA	0	0	NA	NA	No
Within-group	Bulk-R_Infected_vs_Control	MD02G1273700	Chr02	32825037	32827458	+	3.08421	1.74259	4.19228	6.43796e-05	0.000248961	1.17074	Protein kinase superfamily protein	receptor-like protein kinase	0	0	NA	GUB_WAK_bind,Pkinase,Pkinase_Tyr	Yes
Within-group	Bulk-R_Infected_vs_Control	MD15G1195700	Chr15	15544011	15544508	-	3.08205	-3.55026	4.25221	5.157e-05	0.000205265	1.76406	RING/U-box superfamily protein	NA	0	0	NA	NA	No
Within-group	Bulk-R_Infected_vs_Control	MD12G1256200	Chr12	32387454	32390885	+	3.08191	-2.73475	4.3338	3.80142e-05	0.000156971	2.02775	Malectin/receptor-like protein kinase family protein	receptor-like protein kinase	0	0	ko04010,ko04064,ko04620,ko04624,ko04722,ko05133,ko05140,ko05142,ko05145,ko05152,ko05162,ko05169,map04010,map04064,map04620,map04624,map04722,map05133,map05140,map05142,map05145,map05152,map05162,map05169	Pkinase_Tyr	Yes
Within-group	Bulk-R_Infected_vs_Control	MD11G1169600	Chr11	18182608	18183618	-	3.08143	1.73034	4.81442	5.91249e-06	3.06835e-05	3.54999	F-box family protein	F-box protein At2g27310-like	0	0	NA	F-box,F-box-like	Yes
Within-group	Bulk-R_Infected_vs_Control	MD15G1116900	Chr15	8282239	8284926	-	-3.09407	-0.685496	-4.73329	8.15442e-06	4.06114e-05	3.33668	2-oxoglutarate (2OG) and Fe(II)-dependent oxygenase superfamily protein	Belongs to the iron ascorbate-dependent oxidoreductase family	1	0	NA	2OG-FeII_Oxy,DIOX_N	No
Within-group	Bulk-R_Infected_vs_Control	MD05G1269900	Chr05	40487125	40489679	+	3.07608	-2.75214	4.23056	5.5885e-05	0.00021995	1.67774	wall-associated kinase 2	Wall-associated receptor kinase	0	0	NA	EGF_CA,GUB_WAK_bind,Pkinase,Pkinase_Tyr,WAK,hEGF	Yes
Within-group	Bulk-R_Infected_vs_Control	MD08G1027700	Chr08	2022532	2022945	-	3.07446	-3.38704	4.54295	1.71385e-05	7.77323e-05	2.77324	Cupredoxin superfamily protein	Plastocyanin-like domain	0	0	NA	Cu_bind_like	No
Within-group	Bulk-R_Infected_vs_Control	MD16G1149500	Chr16	11785151	11786526	+	3.07352	-3.56922	5.29516	8.32209e-07	5.56618e-06	5.57398	Protein of unknown function	Desiccation-related protein PCC13-62-like	0	0	NA	Ferritin_2	Yes
Within-group	Bulk-R_Infected_vs_Control	MD12G1118800	Chr12	19040396	19040935	-	3.07138	1.4705	5.9941	4.15074e-08	4.22545e-07	8.32961	Protein of unknown function	Senescence regulator	0	0	NA	Senescence_reg	No
Within-group	Bulk-R_Infected_vs_Control	MD01G1224800	Chr01	31578677	31579812	-	3.0704	6.91756	10.3512	5.23241e-17	1.43457e-14	28.0193	Yippee family putative zinc-binding protein	Belongs to the yippee family	0	0	NA	Yippee-Mis18	Yes
Within-group	Bulk-R_Infected_vs_Control	MD05G1242300	Chr05	37512502	37514190	-	3.0697	4.00523	5.65103	1.84413e-07	1.51926e-06	6.55297	plasma-membrane associated cation-binding protein 1	DREPP plasma membrane polypeptide	0	0	NA	DREPP	No
Within-group	Bulk-R_Infected_vs_Control	MD16G1201400	Chr16	18313416	18318281	+	3.06935	8.15049	7.46038	5.15785e-11	1.37452e-09	14.327	ATP sulfurylase 1	ATP sulfurylase 1	0	0	ko00230,ko00261,ko00450,ko00920,ko01100,ko01120,ko01130,map00230,map00261,map00450,map00920,map01100,map01120,map01130	ATP-sulfurylase,PUA_2	Yes
Within-group	Bulk-R_Infected_vs_Control	MD05G1304200	Chr05	43643371	43643613	-	3.06753	-1.34396	5.8974	6.34202e-08	6.04885e-07	7.99714	Protein of unknown function	NA	0	0	NA	NA	No
Within-group	Bulk-R_Infected_vs_Control	MD04G1224000	Chr04	30405162	30408707	+	3.06706	3.10901	7.02792	3.87103e-10	7.70206e-09	12.7472	calcium-binding EF hand family protein	Calcium-binding EF hand family protein	0	0	NA	EF-hand_5,EF-hand_7	Yes
Within-group	Bulk-R_Infected_vs_Control	MD00G1166600	Chr00	38163678	38163911	+	3.06634	-2.8776	5.13636	1.60655e-06	9.82216e-06	4.96474	CRINKLY4 related 3	Serine threonine-protein kinase-like protein	0	0	ko04010,ko04064,ko04620,ko04624,ko04722,ko05133,ko05140,ko05142,ko05145,ko05152,ko05162,ko05169,map04010,map04064,map04620,map04624,map04722,map05133,map05140,map05142,map05145,map05152,map05162,map05169	Pkinase,Pkinase_Tyr,RCC1_2	Yes
Within-group	Bulk-R_Infected_vs_Control	MD16G1275100	Chr16	36779293	36779679	+	3.06248	0.124611	4.65657	1.10224e-05	5.27979e-05	3.06025	Protein of unknown function	NA	0	0	NA	Auxin_inducible	Yes
Within-group	Bulk-R_Infected_vs_Control	MD08G1232100	Chr08	29844717	29847200	+	3.05905	-1.09269	4.01895	0.000121025	0.000432689	0.900436	Protein of unknown function	gag-polypeptide of LTR copia-type	0	0	NA	Retrotran_gag_2	Yes
Within-group	Bulk-R_Infected_vs_Control	MD04G1235000	Chr04	31412482	31416441	+	3.05885	3.32329	6.88955	7.3313e-10	1.33248e-08	12.0898	Leucine-rich repeat protein kinase family protein	Belongs to the protein kinase superfamily. Ser Thr protein kinase family	0	0	NA	LRRNT_2,LRR_1,LRR_8,Pkinase	No
Within-group	Bulk-R_Infected_vs_Control	MD03G1288700	Chr03	36727764	36730398	-	3.05655	7.03094	9.70933	1.12872e-15	1.78129e-13	24.9682	photolyase/blue-light receptor 2	Blue-light photoreceptor	0	0	NA	DNA_photolyase	No
Within-group	Bulk-R_Infected_vs_Control	MD06G1213500	Chr06	34628042	34631913	+	3.05614	2.4437	3.99378	0.000132463	0.000468203	0.393833	cytochrome P450	Cytochrome p450	0	0	NA	p450	Yes
Within-group	Bulk-R_Infected_vs_Control	MD06G1237400	Chr06	36861284	36864216	+	3.05575	-3.05119	4.55875	1.61242e-05	7.36378e-05	2.82895	Nucleotide-diphospho-sugar transferase family protein	At4g15970-like	0	0	NA	Nucleotid_trans	Yes
Within-group	Bulk-R_Infected_vs_Control	MD15G1011100	Chr15	611594	611929	-	3.05549	1.34637	6.54708	3.50666e-09	5.00872e-08	10.7191	Protein of unknown function	NA	0	0	NA	NA	No
Within-group	Bulk-R_Infected_vs_Control	MD07G1106300	Chr07	12047989	12048651	+	3.05525	-3.39676	4.99061	2.91313e-06	1.65488e-05	4.41255	ethylene-responsive element binding factor 13	ethylene-responsive transcription factor	0	0	ko04075,map04075	AP2	Yes
Within-group	Bulk-R_Infected_vs_Control	MD02G1073400	Chr02	5904355	5908568	-	3.05285	2.38554	5.52801	3.11994e-07	2.41043e-06	6.31463	S-adenosyl-L-methionine-dependent methyltransferases superfamily protein	caffeoyl-CoA O-methyltransferase	0	0	ko00360,ko00940,ko00941,ko00945,ko01100,ko01110,map00360,map00940,map00941,map00945,map01100,map01110	Methyltransf_3	No
Within-group	Bulk-R_Infected_vs_Control	MD14G1169600	Chr14	26309154	26311377	+	3.05204	6.55751	7.59866	2.69281e-11	7.81325e-10	14.9641	cytochrome P450	Cytochrome p450	0	0	ko00140,ko00380,ko00460,ko00590,ko00591,ko00830,ko00980,ko01100,ko01110,ko04212,ko04726,ko04750,ko04913,ko04917,ko04927,ko04934,ko05204,map00140,map00380,map00460,map00590,map00591,map00830,map00980,map01100,map01110,map04212,map04726,map04750,map04913,map04917,map04927,map04934,map05204	p450	Yes
Within-group	Bulk-R_Infected_vs_Control	MD05G1211600	Chr05	34281712	34283187	-	3.05089	-2.62943	4.83867	5.36777e-06	2.82739e-05	3.84342	WAG 1	Serine threonine-protein kinase	0	0	NA	Pkinase	Yes
Within-group	Bulk-R_Infected_vs_Control	MD00G1112500	Chr00	23677049	23679547	-	3.04964	6.83781	7.417	6.32101e-11	1.63467e-09	14.1171	root hair specific 19	Belongs to the peroxidase family. Classical plant (class III) peroxidase subfamily	0	0	ko00940,ko01100,ko01110,map00940,map01100,map01110	peroxidase	Yes
Within-group	Bulk-R_Infected_vs_Control	MD10G1212200	Chr10	31093333	31095412	+	3.04634	4.6059	6.51625	4.03243e-09	5.66712e-08	10.1739	Uncharacterized conserved protein (DUF2358)	Uncharacterized conserved protein (DUF2358)	0	0	NA	DUF2358	Yes
Within-group	Bulk-R_Infected_vs_Control	MD04G1153300	Chr04	24171834	24172978	+	3.04632	7.87675	9.15483	1.61455e-14	1.55922e-12	22.3307	Aldolase-type TIM barrel family protein	Belongs to the PdxS SNZ family	0	0	ko00750,map00750	SOR_SNZ	Yes
Within-group	Bulk-R_Infected_vs_Control	MD10G1115100	Chr10	19011837	19015471	-	3.04575	4.84009	8.49005	3.90428e-13	2.18154e-11	19.2687	Leucine-rich receptor-like protein kinase family protein	receptor-like protein kinase	0	0	NA	LRRNT_2,LRR_1,LRR_8,Pkinase,Pkinase_Tyr	Yes
Within-group	Bulk-R_Infected_vs_Control	MD10G1191600	Chr10	28831972	28834442	+	3.03915	2.28367	5.87506	6.99178e-08	6.5851e-07	7.73094	Transmembrane amino acid transporter family protein	GABA transporter 1-like	0	0	NA	Aa_trans	Yes
Within-group	Bulk-R_Infected_vs_Control	MD12G1013100	Chr12	1402723	1403832	+	3.03805	-3.12016	4.69253	9.5735e-06	4.67434e-05	3.31151	alpha/beta-Hydrolases superfamily protein	Serine hydrolase	0	0	NA	Abhydrolase_1	No
Within-group	Bulk-R_Infected_vs_Control	MD04G1160100	Chr04	25052551	25055358	+	-3.03982	5.07535	-2.54816	0.0125215	0.0247522	-4.20428	Thiamine pyrophosphate dependent pyruvate decarboxylase family protein	Belongs to the TPP enzyme family	1	0	ko00010,ko01100,ko01110,ko01130,map00010,map01100,map01110,map01130	TPP_enzyme_C,TPP_enzyme_M,TPP_enzyme_N	No
Within-group	Bulk-R_Infected_vs_Control	MD11G1076600	Chr11	6498127	6500093	+	3.03256	6.2813	8.86652	6.43697e-14	4.83176e-12	20.966	UDP-glucosyl transferase 71D1	Belongs to the UDP-glycosyltransferase family	0	0	NA	UDPGT	Yes
Within-group	Bulk-R_Infected_vs_Control	MD02G1141800	Chr02	11798882	11800288	+	3.03003	0.218686	4.48837	2.11415e-05	9.34942e-05	2.46291	P-loop containing nucleoside triphosphate hydrolases superfamily protein	NA	0	0	NA	NA	Yes
Within-group	Bulk-R_Infected_vs_Control	MD10G1148400	Chr10	23589944	23593294	-	3.02899	1.99847	5.24778	1.01366e-06	6.58646e-06	5.21178	Protein of unknown function (DUF707)	Protein of unknown function (DUF707)	0	0	NA	DUF707	Yes
Within-group	Bulk-R_Infected_vs_Control	MD00G1220300	Chr00	51901939	51903187	-	3.027	3.56009	4.90791	4.06772e-06	2.21733e-05	3.56909	2-oxoglutarate (2OG) and Fe(II)-dependent oxygenase superfamily protein	Belongs to the iron ascorbate-dependent oxidoreductase family	0	0	NA	2OG-FeII_Oxy,DIOX_N	Yes
Within-group	Bulk-R_Infected_vs_Control	MD13G1240700	Chr13	24965849	24967453	-	3.02636	-1.1377	6.44453	5.57623e-09	7.41481e-08	10.2978	NA	NA	0	0	NA	NA	No
Within-group	Bulk-R_Infected_vs_Control	MD16G1216900	Chr16	21318271	21318960	+	3.02513	1.6682	4.96094	3.28486e-06	1.83703e-05	4.05967	ethylene response factor 1	ethylene-responsive transcription factor	0	0	ko04016,ko04075,map04016,map04075	AP2	Yes
Within-group	Bulk-R_Infected_vs_Control	MD02G1319500	Chr02	37385160	37385483	-	3.02447	1.53157	3.14742	0.00223306	0.00552113	-2.05165	Protein of unknown function	NA	0	0	NA	NA	Yes
Within-group	Bulk-R_Infected_vs_Control	MD01G1052700	Chr01	15793894	15796087	+	3.02353	3.13016	6.54295	3.57288e-09	5.09379e-08	10.5271	NAD(P)-binding Rossmann-fold superfamily protein	Belongs to the short-chain dehydrogenases reductases (SDR) family	0	0	ko00902,ko01110,map00902,map01110	adh_short,adh_short_C2	Yes
Within-group	Bulk-R_Infected_vs_Control	MD00G1175000	Chr00	40605109	40607345	+	3.02225	-3.45731	6.19849	1.68004e-08	1.92945e-07	9.19817	cytochrome P450	Belongs to the cytochrome P450 family	0	0	ko00140,ko01100,ko04913,ko04917,ko04927,ko04934,map00140,map01100,map04913,map04917,map04927,map04934	p450	Yes
Within-group	Bulk-R_Infected_vs_Control	MD17G1046200	Chr17	3386162	3387799	-	3.02156	-2.71169	3.10939	0.00250916	0.00610026	-1.78008	LOB domain-containing protein 27	LOB domain-containing protein	0	0	NA	LOB	Yes
Within-group	Bulk-R_Infected_vs_Control	MD10G1299100	Chr10	38631151	38632866	-	3.01548	-0.493055	2.46632	0.0155422	0.029864	-3.513	Polyphenol oxidase	Polyphenol oxidase	0	0	ko00350,ko00950,ko01100,ko01110,map00350,map00950,map01100,map01110	PPO1_DWL,PPO1_KFDV,Tyrosinase	No
Within-group	Bulk-R_Infected_vs_Control	MD13G1247200	Chr13	26054386	26062754	-	3.0141	4.21954	5.44216	4.48953e-07	3.26761e-06	5.69813	H(+)-ATPase 1	Plasma membrane ATPase	0	0	ko00190,map00190	Cation_ATPase_N,E1-E2_ATPase,Hydrolase	Yes
Within-group	Bulk-R_Infected_vs_Control	MD08G1196300	Chr08	25339688	25340656	-	3.01307	4.54916	6.95104	5.52215e-10	1.04231e-08	12.1369	Predicted AT-hook DNA-binding family protein	Transcription factor that specifically binds AT-rich DNA sequences related to the nuclear matrix attachment regions (MARs)	0	0	NA	DUF296	Yes
Within-group	Bulk-R_Infected_vs_Control	MD05G1191500	Chr05	32002721	32005738	+	3.01126	1.00198	3.48053	0.000773264	0.00219714	-1.03284	Leucine-rich repeat receptor-like protein kinase family protein	LRR receptor-like serine threonine-protein kinase	0	0	NA	LRRNT_2,LRR_1,LRR_4,LRR_8,Pkinase,Pkinase_Tyr	No
Within-group	Bulk-R_Infected_vs_Control	MD03G1043000	Chr03	3363976	3365775	+	3.01117	-1.61281	5.12121	1.70976e-06	1.03876e-05	4.90055	zinc-finger protein 2	C2H2-type zinc finger	0	0	NA	zf-C2H2_6	Yes
Within-group	Bulk-R_Infected_vs_Control	MD12G1199300	Chr12	28037569	28039969	+	3.0066	5.05583	6.68028	1.91315e-09	2.9973e-08	10.8496	Low temperature and salt responsive protein family	NA	0	0	NA	NA	No
Within-group	Bulk-R_Infected_vs_Control	MD15G1035800	Chr15	2509528	2512003	+	3.00536	-0.585428	5.46715	4.03938e-07	2.9911e-06	6.24068	mitogen-activated protein kinase kinase kinase 5	Mitogen-activated protein kinase kinase kinase	0	0	ko04010,ko04011,ko04139,ko04722,ko04912,ko05166,map04010,map04011,map04139,map04722,map04912,map05166	Pkinase	Yes
Within-group	Bulk-R_Infected_vs_Control	MD12G1194100	Chr12	27564251	27566090	-	2.99763	-2.51984	4.76044	7.32502e-06	3.69184e-05	3.55234	NA	NA	0	0	NA	NA	No
Within-group	Bulk-R_Infected_vs_Control	MD17G1046300	Chr17	3389509	3393189	+	2.9976	-2.89265	3.73868	0.000324455	0.00102688	0.0691606	Actin cross-linking protein	Domain of unknown function (DUF569)	0	0	NA	DUF569	No
Within-group	Bulk-R_Infected_vs_Control	MD01G1119700	Chr01	23347436	23351576	+	2.99735	3.21153	5.19636	1.25443e-06	7.93731e-06	4.79042	alpha/beta-Hydrolases superfamily protein	Caffeoylshikimate esterase-like	0	0	ko00561,ko01100,ko04714,ko04723,ko04923,map00561,map01100,map04714,map04723,map04923	Hydrolase_4	No
Within-group	Bulk-R_Infected_vs_Control	MD13G1087700	Chr13	6143366	6144967	-	2.9965	-3.32081	4.67759	1.01516e-05	4.92124e-05	3.25708	glyoxal oxidase-related protein	Galactose oxidase-like	0	0	NA	DUF1929,Glyoxal_oxid_N	No
Within-group	Bulk-R_Infected_vs_Control	MD02G1050800	Chr02	4206367	4208387	+	2.99605	3.4857	4.6834	9.92296e-06	4.81951e-05	2.72801	2-oxoglutarate (2OG) and Fe(II)-dependent oxygenase superfamily protein	Belongs to the iron ascorbate-dependent oxidoreductase family	0	0	NA	2OG-FeII_Oxy,DIOX_N	Yes
Within-group	Bulk-R_Infected_vs_Control	MD04G1131200	Chr04	21811915	21815253	+	2.99539	-2.5448	3.41773	0.000949419	0.00262482	-0.916302	laccase 17	Belongs to the multicopper oxidase family	0	0	NA	Cu-oxidase,Cu-oxidase_2,Cu-oxidase_3	No
Within-group	Bulk-R_Infected_vs_Control	MD04G1184700	Chr04	27584295	27587144	+	2.99463	0.235822	5.73949	1.25975e-07	1.09206e-06	7.32915	Pectinacetylesterase family protein	Hydrolyzes acetyl esters in homogalacturonan regions of pectin. In type I primary cell wall, galacturonic acid residues of pectin can be acetylated at the O-2 and O-3 positions. Decreasing the degree of acetylation of pectin gels in vitro alters their physical properties	0	0	ko04310,map04310	PAE	No
Within-group	Bulk-R_Infected_vs_Control	MD07G1221300	Chr07	29846011	29848932	-	2.99255	2.9642	4.73825	7.99658e-06	3.9936e-05	3.04788	Alpha/beta hydrolase related protein	regulation of endocannabinoid signaling pathway	0	0	NA	MENTAL	Yes
Within-group	Bulk-R_Infected_vs_Control	MD15G1349300	Chr15	41387002	41388072	-	2.97962	-2.8679	5.1629	1.44023e-06	8.95355e-06	5.06631	NA	NA	0	0	NA	NA	Yes
Within-group	Bulk-R_Infected_vs_Control	MD02G1138300	Chr02	11579208	11581067	+	2.97558	-2.50463	4.37589	3.24392e-05	0.000136384	2.17177	alpha/beta-Hydrolases superfamily protein	Bifunctional epoxide hydrolase 2-like	0	0	NA	Abhydrolase_1	Yes
Within-group	Bulk-R_Infected_vs_Control	MD10G1248500	Chr10	34164259	34170421	+	2.97524	-0.0612755	4.68453	9.87895e-06	4.80259e-05	3.20467	wall-associated kinase 2	NA	0	0	NA	NA	Yes
Within-group	Bulk-R_Infected_vs_Control	MD05G1285000	Chr05	41897026	41898543	+	2.97256	-3.0258	4.08533	9.52161e-05	0.000350647	1.18629	cytochrome P450	Cytochrome p450	0	0	ko00100,ko01100,ko01110,map00100,map01100,map01110	p450	No
Within-group	Bulk-R_Infected_vs_Control	MD10G1305700	Chr10	39174684	39175901	-	2.97251	1.33952	6.03034	3.53869e-08	3.67289e-07	8.5051	myb domain protein 74	Myb-related protein	0	0	NA	Myb_DNA-binding	No
Within-group	Bulk-R_Infected_vs_Control	MD15G1050700	Chr15	3459356	3461853	-	2.97086	-0.431155	3.99507	0.000131855	0.000466357	0.796706	cytochrome P450	Cytochrome p450	0	0	ko00908,ko01100,ko01110,map00908,map01100,map01110	p450	Yes
Within-group	Bulk-R_Infected_vs_Control	MD10G1273700	Chr10	36556175	36558521	-	2.97069	3.48332	3.19034	0.00195556	0.00491618	-2.14266	NOD26-like intrinsic protein 1	Belongs to the MIP aquaporin (TC 1.A.8) family	0	0	NA	MIP	No
Within-group	Bulk-R_Infected_vs_Control	MD12G1038600	Chr12	4161414	4162100	-	2.96951	4.87366	4.4491	2.45671e-05	0.000106584	1.61888	Late embryogenesis abundant (LEA) hydroxyproline-rich glycoprotein family	NA	0	0	NA	NA	Yes
Within-group	Bulk-R_Infected_vs_Control	MD03G1233700	Chr03	31939872	31942051	-	2.96895	-1.6347	5.00399	2.75915e-06	1.57906e-05	4.45331	Concanavalin A-like lectin protein kinase family protein	L-type lectin-domain containing receptor kinase IX.1-like	0	0	ko04010,ko04064,ko04620,ko04621,ko04624,ko04722,ko05133,ko05140,ko05142,ko05145,ko05152,ko05162,ko05164,map04010,map04064,map04620,map04621,map04624,map04722,map05133,map05140,map05142,map05145,map05152,map05162,map05164	Lectin_legB,Pkinase	Yes
Within-group	Bulk-R_Infected_vs_Control	MD13G1195700	Chr13	17030246	17034992	-	2.96729	2.7131	4.5136	1.91897e-05	8.58323e-05	2.24621	pinoresinol reductase 1	Isoflavone reductase homolog	0	0	NA	NmrA	Yes
Within-group	Bulk-R_Infected_vs_Control	MD13G1102100	Chr13	7258848	7267359	-	2.96319	5.02995	8.96981	3.9224e-14	3.22895e-12	21.5408	MATE efflux family protein	Belongs to the multi antimicrobial extrusion (MATE) (TC 2.A.66.1) family	0	0	NA	MatE	Yes
Within-group	Bulk-R_Infected_vs_Control	MD01G1158000	Chr01	26481618	26486841	-	2.96234	4.50934	6.99457	4.51671e-10	8.80799e-09	12.3653	Glycosyl hydrolase family 85	cytosolic	0	0	ko00511,map00511	Glyco_hydro_85	Yes
Between-groups	Bulk-R_vs_Bulk-S_Infected	MD10G1306300	Chr10	39209841	39216348	-	3.06254	0.412893	5.22488	1.11472e-06	0.00163925	5.18282	AGAMOUS-like 24	Myb-like DNA-binding domain	0	0	NA	Myb_DNA-binding	No
Within-group	Bulk-R_Infected_vs_Control	MD11G1112700	Chr11	10189220	10198644	-	2.96062	-1.71063	3.40869	0.000977686	0.00269078	-0.981686	polyprenyltransferase 1	Catalyzes the prenylation of para-hydroxybenzoate (PHB) with an all-trans polyprenyl group. Mediates the second step in the final reaction sequence of coenzyme Q (CoQ) biosynthesis, which is the condensation of the polyisoprenoid side chain with PHB, generating the first membrane-bound Q intermediate	0	0	ko00130,ko01100,ko01110,map00130,map01100,map01110	UbiA	No
Within-group	Bulk-R_Infected_vs_Control	MD09G1036100	Chr09	2230131	2230610	+	2.9596	0.558893	3.88535	0.000194713	0.000655432	0.357667	NHL domain-containing protein	NA	0	0	NA	NA	No
Within-group	Bulk-R_Infected_vs_Control	MD15G1021500	Chr15	1244122	1250499	+	2.95902	1.66337	4.19029	6.48542e-05	0.000250647	1.23686	cytokinin oxidase 5	Cytokinin dehydrogenase	0	0	ko00908,map00908	Cytokin-bind,FAD_binding_4	Yes
Within-group	Bulk-R_Infected_vs_Control	MD14G1123400	Chr14	19800413	19801431	-	2.95867	-0.229214	3.56295	0.00058853	0.0017295	-0.583569	subtilisin-like serine protease 3	Peptidase inhibitor I9	0	0	NA	Inhibitor_I9	No
Within-group	Bulk-R_Infected_vs_Control	MD08G1072700	Chr08	5883859	5885431	-	2.95854	3.28656	4.22639	5.67549e-05	0.000222967	1.18253	Protein of unknown function	RNA binding	0	0	NA	NA	No
Within-group	Bulk-R_Infected_vs_Control	MD17G1236800	Chr17	28546249	28547034	+	2.95814	-3.24136	3.31636	0.00131553	0.00348197	-1.18085	NA	NA	0	0	NA	NA	Yes
Within-group	Bulk-R_Infected_vs_Control	MD15G1317500	Chr15	32749459	32750651	+	2.955	-0.566825	3.0617	0.00290028	0.00692011	-2.04498	Protein of unknown function	NA	0	0	NA	NA	Yes
Within-group	Bulk-R_Infected_vs_Control	MD02G1079100	Chr02	6222404	6223820	-	2.95495	-2.93753	3.40329	0.000994962	0.00273135	-0.948082	NA	NA	0	0	NA	NA	No
Within-group	Bulk-R_Infected_vs_Control	MD09G1254200	Chr09	32556689	32558030	+	2.94962	-1.36955	3.91394	0.000176013	0.000600863	0.57601	S-adenosyl-L-methionine-dependent methyltransferases superfamily protein	NA	0	0	NA	NA	No
Within-group	Bulk-R_Infected_vs_Control	MD00G1007000	Chr00	989112	995429	-	2.94875	3.98293	5.96911	4.63253e-08	4.63998e-07	7.82821	receptor-like kinase in flowers 1	Di-glucose binding within endoplasmic reticulum	0	0	NA	LRR_8,Malectin,Pkinase_Tyr	Yes
Within-group	Bulk-R_Infected_vs_Control	MD06G1190200	Chr06	32652286	32653606	-	2.9487	-3.3492	3.94511	0.000157593	0.000544998	0.734573	BANQUO 3	transcription factor	0	0	NA	HLH	Yes
Within-group	Bulk-R_Infected_vs_Control	MD01G1141700	Chr01	25132567	25134498	+	2.94834	3.0339	3.45732	0.000834417	0.00234801	-1.35424	Protein of unknown function	expressed protein	0	0	NA	NA	No
Within-group	Bulk-R_Infected_vs_Control	MD15G1048500	Chr15	3307912	3309857	-	2.94711	-1.00223	3.77513	0.000286111	0.000920379	0.0870833	Protein kinase superfamily protein	Serine threonine-protein kinase	0	0	NA	Pkinase,Pkinase_Tyr	No
Within-group	Bulk-R_Infected_vs_Control	MD02G1128700	Chr02	10415094	10421604	-	2.94414	-0.217754	4.64487	1.15382e-05	5.49027e-05	3.03229	Glycosyl hydrolase family 38 protein	Lysosomal	0	0	ko00511,map00511	Alpha-mann_mid,Glyco_hydro_38,Glyco_hydro_38C	Yes
Within-group	Bulk-R_Infected_vs_Control	MD10G1275800	Chr10	36698263	36699996	-	2.94366	1.43948	4.84605	5.21192e-06	2.75652e-05	3.69603	WRKY DNA-binding protein 65	WRKY transcription factor	0	0	NA	WRKY	No
Within-group	Bulk-R_Infected_vs_Control	MD06G1218900	Chr06	35158479	35161283	-	2.94285	3.23439	6.45337	5.35829e-09	7.16921e-08	10.1134	Protein kinase superfamily protein	Serine threonine-protein kinase	0	0	ko04010,ko04064,ko04620,ko04621,ko04624,ko04722,ko05133,ko05140,ko05142,ko05145,ko05152,ko05162,ko05164,map04010,map04064,map04620,map04621,map04624,map04722,map05133,map05140,map05142,map05145,map05152,map05162,map05164	GUB_WAK_bind,Pkinase,Pkinase_Tyr,WAK_assoc	Yes
Within-group	Bulk-R_Infected_vs_Control	MD09G1121400	Chr09	9370900	9373541	-	2.94172	4.09379	5.92381	5.65016e-08	5.48278e-07	7.67115	Protein kinase superfamily protein	Serine threonine-protein kinase	0	0	NA	Pkinase	Yes
Within-group	Bulk-R_Infected_vs_Control	MD06G1024300	Chr06	2982030	2985337	+	2.94126	0.96954	4.71868	8.63784e-06	4.27426e-05	3.23384	NB-ARC domain-containing disease resistance protein	Belongs to the disease resistance NB-LRR family	0	0	ko04626,map04626	NB-ARC	No
Within-group	Bulk-R_Infected_vs_Control	MD03G1163900	Chr03	20441803	20446772	+	2.93954	2.95145	4.98935	2.92796e-06	1.66272e-05	4.04054	protein kinase 2B	Protein kinase 2B, chloroplastic-like	0	0	NA	Pkinase,Pkinase_Tyr	Yes
Within-group	Bulk-R_Infected_vs_Control	MD15G1310300	Chr15	31182898	31184322	+	2.93797	-2.44906	4.85755	4.97793e-06	2.6466e-05	3.91062	UDP-Glycosyltransferase superfamily protein	Belongs to the UDP-glycosyltransferase family	0	0	NA	UDPGT	Yes
Within-group	Bulk-R_Infected_vs_Control	MD06G1091100	Chr06	21989587	21990357	+	2.93507	-1.48002	3.18132	0.00201104	0.00503764	-1.6409	NADH-Ubiquinone/plastoquinone (complex I) protein	Encoded by	0	0	ko00190,ko01100,map00190,map01100	Proton_antipo_M	Yes
Within-group	Bulk-R_Infected_vs_Control	MD08G1189800	Chr08	23942701	23944625	-	2.93421	4.7059	5.36283	6.26983e-07	4.37347e-06	5.19356	Protein of unknown function	NA	0	0	NA	NA	Yes
Within-group	Bulk-R_Infected_vs_Control	MD08G1032900	Chr08	2337058	2339497	-	2.9335	3.26037	6.51228	4.10545e-09	5.75724e-08	10.3908	cytochrome P450	Cytochrome p450	0	0	NA	p450	Yes
Within-group	Bulk-R_Infected_vs_Control	MD03G1224800	Chr03	31045176	31046685	+	2.93268	2.83625	2.66085	0.00922649	0.0189665	-3.46692	cytochrome P450	Belongs to the cytochrome P450 family	0	0	ko00908,ko01100,ko01110,ko04726,map00908,map01100,map01110,map04726	p450	Yes
Within-group	Bulk-R_Infected_vs_Control	MD15G1226500	Chr15	18396144	18400086	-	2.9325	2.74346	5.06391	2.16184e-06	1.27187e-05	4.36972	Concanavalin A-like lectin protein kinase family protein	L-type lectin-domain containing receptor kinase	0	0	NA	Lectin_legB,Pkinase,Pkinase_Tyr	No
Within-group	Bulk-R_Infected_vs_Control	MD10G1307500	Chr10	39278047	39281321	+	2.93176	-2.03851	4.50181	2.00795e-05	8.92936e-05	2.61004	S-locus lectin protein kinase family protein	G-type lectin S-receptor-like serine threonine-protein kinase	0	0	NA	B_lectin,DUF3403,PAN_2,Pkinase,Pkinase_Tyr,S_locus_glycop	Yes
Within-group	Bulk-R_Infected_vs_Control	MD15G1050400	Chr15	3436991	3439517	-	2.92824	-3.09061	3.42969	0.000913196	0.00254	-0.856148	cytochrome P450	Cytochrome p450	0	0	ko00908,ko01100,ko01110,ko04726,map00908,map01100,map01110,map04726	p450	No
Within-group	Bulk-R_Infected_vs_Control	MD09G1211700	Chr09	20665714	20666442	-	2.92754	-2.91623	4.92491	3.79884e-06	2.08907e-05	4.16578	Mitochondrial substrate carrier family protein	Belongs to the mitochondrial carrier (TC 2.A.29) family	0	0	ko04714,map04714	Mito_carr	No
Within-group	Bulk-R_Infected_vs_Control	MD02G1199100	Chr02	19552642	19554174	+	2.92419	-0.237306	6.35911	8.19133e-09	1.0368e-07	9.94032	NB-ARC domain-containing disease resistance protein	Belongs to the disease resistance NB-LRR family	0	0	ko04626,map04626	NB-ARC	Yes
Within-group	Bulk-R_Infected_vs_Control	MD04G1083500	Chr04	11955473	11956621	-	2.92215	-2.97133	2.67324	0.00891713	0.0184243	-2.88578	Calcineurin-like metallo-phosphoesterase superfamily protein	Serine threonine-protein phosphatase	0	0	ko03015,ko04022,ko04024,ko04113,ko04114,ko04218,ko04261,ko04270,ko04390,ko04510,ko04611,ko04720,ko04728,ko04750,ko04810,ko04910,ko04921,ko04931,ko05031,ko05034,ko05168,ko05205,map03015,map04022,map04024,map04113,map04114,map04218,map04261,map04270,map04390,map04510,map04611,map04720,map04728,map04750,map04810,map04910,map04921,map04931,map05031,map05034,map05168,map05205	Metallophos,STPPase_N	No
Within-group	Bulk-R_Infected_vs_Control	MD16G1157300	Chr16	12585084	12587610	-	2.92082	-1.84575	4.10049	9.01099e-05	0.000334585	1.19441	Mitochondrial import inner membrane translocase subunit Tim17/Tim22/Tim23 family protein	Outer envelope pore protein 16-2	0	0	NA	Tim17	No
Within-group	Bulk-R_Infected_vs_Control	MD10G1190400	Chr10	28761223	28762743	-	2.91881	4.38351	4.49302	2.07682e-05	9.19898e-05	1.91338	cytochrome P450	Cytochrome p450	0	0	ko00073,map00073	p450	Yes
Within-group	Bulk-R_Infected_vs_Control	MD07G1207400	Chr07	28653830	28656063	-	2.9188	-3.08052	5.44223	4.48828e-07	3.26743e-06	6.14995	NA	NA	0	0	NA	NA	Yes
Within-group	Bulk-R_Infected_vs_Control	MD06G1091200	Chr06	21994255	21995556	+	2.91741	-0.306612	4.37488	3.25625e-05	0.000136849	2.084	WRKY family transcription factor	WRKY transcription factor	0	0	ko04016,ko04626,map04016,map04626	WRKY	Yes
Within-group	Bulk-R_Infected_vs_Control	MD11G1245000	Chr11	35590940	35593894	+	2.9171	4.78172	6.7375	1.47307e-09	2.38403e-08	11.1467	RING membrane-anchor 1	E3 ubiquitin-protein ligase	0	0	ko04141,map04141	zf-C3HC4,zf-C3HC4_2,zf-C3HC4_3	No
Within-group	Bulk-R_Infected_vs_Control	MD01G1235200	Chr01	32282407	32285338	-	2.91665	-2.31448	4.05298	0.000107053	0.000388705	1.06024	Laccase/Diphenol oxidase family protein	Lignin degradation and detoxification of lignin-derived products	0	0	NA	Cu-oxidase,Cu-oxidase_2,Cu-oxidase_3	Yes
Within-group	Bulk-R_Infected_vs_Control	MD12G1228200	Chr12	30351221	30357589	-	2.91486	-1.96578	3.61344	0.0004969	0.00148767	-0.357257	Calcium-dependent phospholipid-binding Copine family protein	BONZAI 3-like	0	0	NA	C2,Copine	No
Within-group	Bulk-R_Infected_vs_Control	MD17G1063000	Chr17	5110624	5113128	-	2.91485	2.42178	4.93724	3.61472e-06	1.99835e-05	3.92133	Malectin/receptor-like protein kinase family protein	receptor-like protein kinase	0	0	NA	Malectin_like,Pkinase_Tyr	No
Within-group	Bulk-R_Infected_vs_Control	MD11G1059400	Chr11	5068503	5071526	-	2.91369	5.18272	6.15338	2.05325e-08	2.29612e-07	8.49625	WRKY DNA-binding protein 33	WRKY transcription factor	0	0	ko04016,ko04626,map04016,map04626	WRKY	Yes
Within-group	Bulk-R_Infected_vs_Control	MD10G1337700	Chr10	41379617	41380917	-	2.91365	5.26957	7.04141	3.6368e-10	7.30339e-09	12.4502	Heavy metal transport/detoxification superfamily protein	leucine-rich repeat extensin-like protein	0	0	NA	HMA	Yes
Within-group	Bulk-R_Infected_vs_Control	MD09G1074300	Chr09	5162693	5164884	+	2.91354	3.83195	6.72384	1.56797e-09	2.51747e-08	11.2336	Thioredoxin superfamily protein	DSBA-like thioredoxin domain	0	0	NA	DSBA	Yes
Within-group	Bulk-R_Infected_vs_Control	MD13G1090800	Chr13	6436603	6441769	+	2.91009	6.13162	7.56926	3.09246e-11	8.78377e-10	14.8375	aldehyde dehydrogenase 2B7	Aldehyde dehydrogenase family	0	0	ko00010,ko00053,ko00071,ko00280,ko00310,ko00330,ko00340,ko00380,ko00410,ko00561,ko00620,ko00625,ko00903,ko00981,ko01100,ko01110,ko01120,ko01130,map00010,map00053,map00071,map00280,map00310,map00330,map00340,map00380,map00410,map00561,map00620,map00625,map00903,map00981,map01100,map01110,map01120,map01130	Aldedh	Yes
Within-group	Bulk-R_Infected_vs_Control	MD15G1442000	Chr15	54185498	54189171	-	2.90859	-3.18743	4.21605	5.89699e-05	0.000230661	1.63504	beta glucosidase 13	NA	0	0	NA	NA	Yes
Within-group	Bulk-R_Infected_vs_Control	MD11G1036800	Chr11	3180305	3184669	+	2.90567	5.17976	8.09082	2.62067e-12	1.06246e-10	17.3524	farnesyl diphosphate synthase 2	Belongs to the FPP GGPP synthase family	0	0	ko00900,ko01100,ko01110,ko01130,ko05164,ko05166,map00900,map01100,map01110,map01130,map05164,map05166	polyprenyl_synt	Yes
Within-group	Bulk-R_Infected_vs_Control	MD15G1277700	Chr15	24447859	24451158	+	2.90434	4.52331	5.00539	2.74353e-06	1.57178e-05	3.75923	Disease resistance protein (CC-NBS-LRR class) family	disease resistance	0	0	ko04014,map04014	NB-ARC,RPW8	Yes
Within-group	Bulk-R_Infected_vs_Control	MD16G1097400	Chr16	6793420	6796085	-	2.90388	1.45887	5.19502	1.26139e-06	7.96888e-06	5.03592	cysteine-rich RLK (RECEPTOR-like protein kinase) 2	Cysteine-rich receptor-like protein kinase	0	0	NA	Pkinase,Pkinase_Tyr,Stress-antifung	No
Within-group	Bulk-R_Infected_vs_Control	MD02G1053300	Chr02	4355368	4356384	+	2.90362	-2.59402	4.96056	3.28985e-06	1.8395e-05	4.29342	2-oxoglutarate (2OG) and Fe(II)-dependent oxygenase superfamily protein	Belongs to the iron ascorbate-dependent oxidoreductase family	0	0	NA	2OG-FeII_Oxy,DIOX_N	No
Within-group	Bulk-R_Infected_vs_Control	MD15G1051000	Chr15	3473780	3475855	-	2.90169	-1.56581	4.45945	2.36149e-05	0.00010288	2.44467	myb domain protein 3	Transcription factor	0	0	NA	Myb_DNA-binding	Yes
Within-group	Bulk-R_Infected_vs_Control	MD08G1178600	Chr08	21966004	21969762	-	2.90044	-1.64133	3.93237	0.000164888	0.000567254	0.635366	Glucan 1	Belongs to the glycosyl hydrolase 5 (cellulase A) family	0	0	NA	Cellulase	No
Within-group	Bulk-R_Infected_vs_Control	MD01G1013200	Chr01	6474198	6474686	+	2.89878	-2.27842	4.15303	7.43736e-05	0.000282642	1.40383	Calcium-binding EF-hand family protein	calcium-binding protein	0	0	ko04626,map04626	EF-hand_1,EF-hand_5,EF-hand_7,EF-hand_8	No
Within-group	Bulk-R_Infected_vs_Control	MD06G1090200	Chr06	21910602	21912173	+	2.89874	-1.6996	5.18091	1.33712e-06	8.39482e-06	5.12536	Heavy metal transport/detoxification superfamily protein	late blight resistance protein homolog R1B-19	0	0	NA	HMA	No
Within-group	Bulk-R_Infected_vs_Control	MD04G1069600	Chr04	9533893	9539852	-	2.89846	3.78354	6.63091	2.39588e-09	3.62034e-08	10.8384	phospholipase D beta 1	Phospholipase D	0	0	ko00564,ko00565,ko01100,ko01110,ko04014,ko04024,ko04071,ko04072,ko04144,ko04666,ko04724,ko04912,ko05231,map00564,map00565,map01100,map01110,map04014,map04024,map04071,map04072,map04144,map04666,map04724,map04912,map05231	C2,PLD_C,PLDc	Yes
Within-group	Bulk-R_Infected_vs_Control	MD06G1214400	Chr06	34714412	34719017	+	2.89727	0.906824	3.45029	0.000853825	0.00239471	-1.10968	cytochrome P450	Cytochrome p450	0	0	NA	p450	No
Within-group	Bulk-R_Infected_vs_Control	MD10G1185000	Chr10	27913175	27913672	+	2.89532	-3.66157	4.5356	1.76318e-05	7.97014e-05	2.75232	Integrase-type DNA-binding superfamily protein	transcription factor	0	0	NA	AP2	Yes
Within-group	Bulk-R_Infected_vs_Control	MD11G1012300	Chr11	886298	887248	-	2.89428	1.7432	4.42409	2.70223e-05	0.0001157	2.09496	Family of unknown function (DUF716)	Family of unknown function (DUF716)	0	0	NA	DUF716	Yes
Within-group	Bulk-R_Infected_vs_Control	MD09G1092400	Chr09	6783711	6785858	-	2.89221	3.25658	5.77299	1.08974e-07	9.6326e-07	7.16188	transferases	Formiminotransferase domain	0	0	NA	FTCD_N	No
Within-group	Bulk-R_Infected_vs_Control	MD05G1098300	Chr05	20446609	20447349	-	2.88842	2.83877	4.64863	1.137e-05	5.42479e-05	2.74631	salt tolerance zinc finger	NA	0	0	NA	NA	Yes
Within-group	Bulk-R_Infected_vs_Control	MD07G1023000	Chr07	1909824	1911023	-	2.88842	-2.35699	4.84198	5.29738e-06	2.79805e-05	3.84918	NA	NA	0	0	NA	NA	No
Within-group	Bulk-R_Infected_vs_Control	MD11G1203500	Chr11	29639350	29646552	+	2.88782	0.797006	6.84217	9.11642e-10	1.58396e-08	12.0299	multidrug resistance-associated protein 3	ABC transporter C family member	0	0	ko01523,ko01524,ko02010,ko04976,map01523,map01524,map02010,map04976	ABC_membrane,ABC_tran	Yes
Within-group	Bulk-R_Infected_vs_Control	MD14G1244200	Chr14	32249478	32251447	+	2.88527	-3.49986	4.88084	4.53466e-06	2.43497e-05	4.00332	Nucleotide-diphospho-sugar transferase family protein	At4g15970-like	0	0	NA	Nucleotid_trans	No
Within-group	Bulk-R_Infected_vs_Control	MD03G1076400	Chr03	6221469	6226661	-	2.88439	-2.22749	3.31691	0.00131323	0.00347616	-1.21743	Laccase/Diphenol oxidase family protein	Lignin degradation and detoxification of lignin-derived products	0	0	NA	Cu-oxidase,Cu-oxidase_2,Cu-oxidase_3	No
Within-group	Bulk-R_Infected_vs_Control	MD09G1040400	Chr09	2545513	2546442	+	2.88397	-2.54762	4.26843	4.85492e-05	0.000194485	1.80686	matrix metalloproteinase	metalloendoproteinase 1-like	0	0	NA	PG_binding_1,Peptidase_M10	Yes
Within-group	Bulk-R_Infected_vs_Control	MD09G1196600	Chr09	17924534	17927159	-	2.88212	2.09874	4.88517	4.45663e-06	2.40101e-05	3.74043	RAB GTPase homolog 1A	GTP-BINDING protein	0	0	ko05134,map05134	Ras	Yes
Within-group	Bulk-R_Infected_vs_Control	MD01G1194100	Chr01	29290241	29291342	+	2.88203	0.0572295	4.04822	0.00010891	0.00039461	0.931324	TCP family transcription factor	transcription factor	0	0	NA	TCP	No
Within-group	Bulk-R_Infected_vs_Control	MD06G1041000	Chr06	5217113	5219045	-	2.88134	2.25428	3.36788	0.00111545	0.00301455	-1.53683	expansin-like B1	Belongs to the expansin family	0	0	NA	DPBB_1,Pollen_allerg_1	No
Within-group	Bulk-R_Infected_vs_Control	MD00G1087800	Chr00	17810848	17812457	-	2.88007	-2.91231	3.16957	0.00208558	0.00519901	-1.61978	Pectin lyase-like superfamily protein	Polygalacturonase-like	0	0	ko00040,ko01100,map00040,map01100	Glyco_hydro_28	No
Within-group	Bulk-R_Infected_vs_Control	MD06G1004700	Chr06	525512	531519	+	2.87727	-0.54432	5.48986	3.66875e-07	2.75638e-06	6.31989	phosphate transporter 1	Inorganic phosphate transporter	0	0	NA	Sugar_tr	Yes
Within-group	Bulk-R_Infected_vs_Control	MD07G1172700	Chr07	25017270	25021278	-	2.87612	5.77188	6.75757	1.34378e-09	2.20568e-08	11.1295	phenylalanine ammonia-lyase 2	Phenylalanine ammonia-lyase	0	0	ko00360,ko00940,ko01100,ko01110,map00360,map00940,map01100,map01110	Lyase_aromatic	No
Within-group	Bulk-R_Infected_vs_Control	MD06G1093100	Chr06	22413634	22414185	-	2.8729	-1.06718	4.086	9.49824e-05	0.000350145	1.13587	Late embryogenesis abundant (LEA) hydroxyproline-rich glycoprotein family	Late embryogenesis abundant protein	0	0	NA	LEA_2	Yes
Within-group	Bulk-R_Infected_vs_Control	MD07G1007500	Chr07	689924	690863	+	2.87081	-3.02275	5.35571	6.46009e-07	4.4878e-06	5.81223	UDP-glucosyltransferase 73B2	Belongs to the UDP-glycosyltransferase family	0	0	NA	UDPGT	Yes
Within-group	Bulk-R_Infected_vs_Control	MD10G1126100	Chr10	20609606	20614805	-	2.8701	-1.13882	3.40832	0.000978845	0.00269351	-0.988569	Aminotransferase-like	NA	0	0	NA	NA	No
Within-group	Bulk-R_Infected_vs_Control	MD10G1325100	Chr10	40578644	40579096	-	2.8675	-3.41548	3.34841	0.00118744	0.00318435	-1.09811	Stigma-specific Stig1 family protein	Stigma-specific protein, Stig1	0	0	NA	Stig1	Yes
Within-group	Bulk-R_Infected_vs_Control	MD12G1211300	Chr12	28987642	28991090	-	2.86692	-3.05189	3.42415	0.000929802	0.00257918	-0.883336	beta glucosidase 17	NA	0	0	NA	NA	No
Within-group	Bulk-R_Infected_vs_Control	MD12G1161300	Chr12	24256610	24258055	+	2.86452	3.81873	2.43122	0.0170263	0.0323222	-4.229	HXXXD-type acyl-transferase family protein	NA	0	0	NA	NA	Yes
Within-group	Bulk-S_Infected_vs_Control	MD14G1145500	Chr14	23835989	23838741	-	5.78834	7.47914	21.0709	1.3513e-36	4.37174e-32	72.9464	Protein of unknown function	Encoded by	0	0	NA	SURNod19	Yes
Within-group	Bulk-R_Infected_vs_Control	MD05G1363600	Chr05	47837762	47840607	-	2.8639	3.6942	5.08915	1.94987e-06	1.16216e-05	4.22019	phosphofructokinase 2	Catalyzes the phosphorylation of D-fructose 6-phosphate to fructose 1,6-bisphosphate by ATP, the first committing step of glycolysis	0	0	ko00010,ko00030,ko00051,ko00052,ko00680,ko01100,ko01110,ko01120,ko01130,ko01200,ko01230,ko03018,ko04152,ko05230,map00010,map00030,map00051,map00052,map00680,map01100,map01110,map01120,map01130,map01200,map01230,map03018,map04152,map05230	PFK	Yes
Within-group	Bulk-R_Infected_vs_Control	MD05G1327900	Chr05	45341524	45344921	+	2.86294	0.499317	5.60742	2.22332e-07	1.78928e-06	6.75888	S-locus lectin protein kinase family protein	serine threonine-protein kinase	0	0	NA	B_lectin,DUF3403,PAN_2,Pkinase,Pkinase_Tyr,S_locus_glycop	No
Within-group	Bulk-R_Infected_vs_Control	MD11G1227600	Chr11	33135335	33139836	+	2.86152	-0.0592965	3.92417	0.000169757	0.000581802	0.527445	galacturonosyltransferase 12	Belongs to the glycosyltransferase 8 family	0	0	NA	Glyco_transf_8	No
Within-group	Bulk-R_Infected_vs_Control	MD08G1216100	Chr08	27893116	27895415	-	2.86112	2.76121	5.63529	1.97302e-07	1.61149e-06	6.68353	12-oxophytodienoate reductase 2	12-oxophytodienoate reductase	0	0	ko00592,ko01100,ko01110,map00592,map01100,map01110	Oxidored_FMN	Yes
Within-group	Bulk-R_Infected_vs_Control	MD06G1024500	Chr06	2997128	2999977	+	2.86002	4.84983	6.95223	5.49205e-10	1.03724e-08	12.1023	NB-ARC domain-containing disease resistance protein	Belongs to the disease resistance NB-LRR family	0	0	ko04626,map04626	NB-ARC	No
Within-group	Bulk-R_Infected_vs_Control	MD12G1032400	Chr12	3566482	3569888	-	2.85942	4.52998	7.87819	7.19076e-12	2.54803e-10	16.4372	Peptidase M20/M25/M40 family protein	Iaa-amino acid hydrolase	0	0	NA	M20_dimer,Peptidase_M20	Yes
Within-group	Bulk-R_Infected_vs_Control	MD08G1106100	Chr08	9186092	9188109	-	2.85492	1.19607	4.96312	3.25605e-06	1.82375e-05	4.18306	Calcineurin-like metallo-phosphoesterase superfamily protein	Calcineurin-like phosphoesterase	0	0	NA	Metallophos	No
Within-group	Bulk-R_Infected_vs_Control	MD08G1105300	Chr08	8958389	8960583	-	2.8546	-3.46633	3.96731	0.00014561	0.00050856	0.812267	phospholipase A 2A	Lipolytic acyl hydrolase (LAH)	0	0	NA	Patatin	No
Within-group	Bulk-R_Infected_vs_Control	MD13G1176200	Chr13	14587361	14594072	+	2.85228	0.675457	3.73276	0.000331122	0.00104522	-0.142892	inosine-uridine preferring nucleoside hydrolase family protein	Inosine-uridine preferring nucleoside hydrolase	0	0	ko03013,map03013	IU_nuc_hydro	Yes
Within-group	Bulk-R_Infected_vs_Control	MD13G1104400	Chr13	7468511	7471089	+	2.85069	-2.58166	4.67881	1.01032e-05	4.90045e-05	3.25417	RING domain ligase2	E3 ubiquitin-protein ligase	0	0	NA	Copine,zf-C3HC4_3	Yes
Within-group	Bulk-R_Infected_vs_Control	MD10G1255800	Chr10	35040261	35040983	-	2.84967	-4.00635	5.02521	2.53121e-06	1.46572e-05	4.54236	NA	NA	0	0	NA	NA	No
Within-group	Bulk-R_Infected_vs_Control	MD17G1126300	Chr17	11093107	11094650	-	2.84948	-3.46816	4.58991	1.42911e-05	6.62362e-05	2.9442	UDP-Glycosyltransferase superfamily protein	UDP-Glycosyltransferase	0	0	NA	UDPGT	No
Within-group	Bulk-R_Infected_vs_Control	MD03G1208300	Chr03	28737979	28740172	+	2.8493	2.30133	6.44645	5.52825e-09	7.3585e-08	10.1986	Ras-related small GTP-binding family protein	Septum-promoting GTP-binding protein	0	0	ko04111,map04111	Ras	No
Within-group	Bulk-R_Infected_vs_Control	MD00G1092900	Chr00	19565918	19568605	-	2.84808	1.84565	4.28463	4.57025e-05	0.000184682	1.58228	NAD(P)-linked oxidoreductase superfamily protein	reductase	0	0	NA	Aldo_ket_red	Yes
Within-group	Bulk-R_Infected_vs_Control	MD12G1022900	Chr12	2302154	2305935	-	2.84731	6.91706	7.24204	1.43191e-10	3.31605e-09	13.3006	uridine-ribohydrolase 1	uridine nucleosidase 1-like	0	0	ko00240,ko00760,map00240,map00760	IU_nuc_hydro	Yes
Within-group	Bulk-R_Infected_vs_Control	MD03G1245000	Chr03	33198667	33200851	-	2.84387	4.6887	6.57966	3.02473e-09	4.42187e-08	10.4435	2-oxoglutarate (2OG) and Fe(II)-dependent oxygenase superfamily protein	Belongs to the iron ascorbate-dependent oxidoreductase family	0	0	NA	2OG-FeII_Oxy,DIOX_N	Yes
Within-group	Bulk-R_Infected_vs_Control	MD05G1123700	Chr05	24608584	24611120	-	2.84298	5.79259	9.14476	1.6945e-14	1.62672e-12	22.308	FAD/NAD(P)-binding oxidoreductase family protein	Zeaxanthin epoxidase, chloroplastic-like	0	0	NA	FAD_binding_3	Yes
Within-group	Bulk-R_Infected_vs_Control	MD06G1196100	Chr06	33005854	33007989	+	2.84279	1.29332	5.40512	5.24862e-07	3.74511e-06	5.90133	NAC domain containing protein 100	NAC domain-containing protein	0	0	NA	NAM	No
Within-group	Bulk-R_Infected_vs_Control	MD02G1244800	Chr02	29475795	29480278	-	2.84233	4.19125	8.47659	4.16374e-13	2.2909e-11	19.2847	Transmembrane amino acid transporter family protein	GABA transporter 1-like	0	0	NA	Aa_trans	Yes
Within-group	Bulk-R_Infected_vs_Control	MD15G1378200	Chr15	46359354	46369596	-	2.8416	3.05667	6.76135	1.3207e-09	2.1722e-08	11.5165	MATE efflux family protein	Belongs to the multi antimicrobial extrusion (MATE) (TC 2.A.66.1) family	0	0	NA	MatE	Yes
Within-group	Bulk-R_Infected_vs_Control	MD11G1076800	Chr11	6506424	6511780	+	2.84139	5.5075	7.9054	6.32071e-12	2.27208e-10	16.4416	UDP-glucosyl transferase 71D1	Belongs to the UDP-glycosyltransferase family	0	0	NA	UDPGT	Yes
Within-group	Bulk-R_Infected_vs_Control	MD02G1255400	Chr02	30731688	30733624	-	2.84126	7.36792	9.81857	6.68571e-16	1.16917e-13	25.4848	homolog of anti-oxidant 1	Copper transport protein	0	0	ko04978,map04978	HMA	Yes
Within-group	Bulk-R_Infected_vs_Control	MD11G1235500	Chr11	34265464	34268248	-	2.84062	3.01316	4.14993	7.52256e-05	0.000285511	0.935508	Protein of unknown function (DUF1223)	Protein of unknown function (DUF1223)	0	0	NA	DUF1223	No
Within-group	Bulk-R_Infected_vs_Control	MD16G1006700	Chr16	508884	510765	-	2.83307	-1.67666	4.08892	9.39817e-05	0.00034697	1.15528	gibberellin 2-oxidase 8	Belongs to the iron ascorbate-dependent oxidoreductase family	0	0	ko00904,ko01110,map00904,map01110	2OG-FeII_Oxy,B3,DIOX_N	No
Within-group	Bulk-R_Infected_vs_Control	MD06G1097000	Chr06	23245288	23249094	-	2.83031	-1.91076	4.5622	1.59103e-05	7.27945e-05	2.82333	cation/H+ exchanger 18	Cation H( ) antiporter	0	0	NA	Na_H_Exchanger	Yes
Within-group	Bulk-R_Infected_vs_Control	MD02G1016300	Chr02	1232013	1234010	-	2.82947	-2.12632	2.99177	0.00357701	0.00831586	-2.13035	NA	NA	0	0	NA	NA	Yes
Within-group	Bulk-R_Infected_vs_Control	MD13G1096600	Chr13	6833836	6838261	-	2.82822	3.342	5.73506	1.2841e-07	1.11108e-06	6.98221	cysteine-rich RLK (RECEPTOR-like protein kinase) 3	Cysteine-rich receptor-like protein kinase	0	0	NA	Pkinase,Pkinase_Tyr,Stress-antifung	Yes
Within-group	Bulk-R_Infected_vs_Control	MD13G1017400	Chr13	1136957	1138462	-	2.82615	-2.75665	4.56631	1.56596e-05	7.17589e-05	2.84912	epsin N-terminal homology (ENTH) domain-containing protein / clathrin assembly protein-related	Clathrin assembly protein	0	0	NA	ANTH	No
Within-group	Bulk-R_Infected_vs_Control	MD03G1094900	Chr03	8044863	8046507	+	2.82412	-1.05366	5.04139	2.3699e-06	1.3827e-05	4.58858	ENTH/VHS family protein	ENTH domain	0	0	ko04144,map04144	ENTH	Yes
Within-group	Bulk-R_Infected_vs_Control	MD14G1202600	Chr14	29108367	29109344	-	2.82389	3.71017	10.3258	5.90616e-17	1.57914e-14	28.1117	atypical CYS HIS rich thioredoxin 5	Thioredoxin-like 1-2, chloroplastic	0	0	NA	Thioredoxin	Yes
Within-group	Bulk-R_Infected_vs_Control	MD05G1006800	Chr05	1649992	1652938	+	2.82249	2.02924	4.39492	3.01856e-05	0.000127839	1.92516	Toll-Interleukin-Resistance (TIR) domain-containing protein	TMV resistance protein N-like	0	0	NA	LRR_3,NB-ARC,TIR	Yes
Within-group	Bulk-R_Infected_vs_Control	MD05G1122800	Chr05	24548782	24553034	-	2.82177	4.57058	8.88352	5.93295e-14	4.53765e-12	21.1816	Arabidopsis phospholipase-like protein (PEARLI 4) family	Arabidopsis phospholipase-like protein (PEARLI 4)	0	0	NA	PEARLI-4	Yes
Within-group	Bulk-R_Infected_vs_Control	MD15G1193000	Chr15	15214605	15215909	-	2.82086	-1.90632	3.71167	0.000355972	0.00111259	-0.0497714	RING/U-box superfamily protein	E3 ubiquitin-protein ligase	0	0	NA	zf-RING_2	No
Within-group	Bulk-R_Infected_vs_Control	MD07G1279000	Chr07	34347336	34350072	+	2.8167	4.50617	3.64205	0.000451165	0.00136796	-1.05951	Pectin lyase-like superfamily protein	Belongs to the glycosyl hydrolase 28 family	0	0	NA	Glyco_hydro_28	Yes
Within-group	Bulk-R_Infected_vs_Control	MD13G1217400	Chr13	20819562	20822970	+	2.81542	4.15076	6.62255	2.48885e-09	3.73639e-08	10.6987	Peroxisomal membrane 22 kDa (Mpv17/PMP22) family protein	Belongs to the peroxisomal membrane protein PXMP2 4 family	0	0	ko04146,map04146	Mpv17_PMP22	Yes
Within-group	Bulk-R_Infected_vs_Control	MD05G1210100	Chr05	34154934	34156291	+	2.8147	5.921	5.2555	9.81647e-07	6.41451e-06	4.64514	glutathione S-transferase TAU 19	Glutathione S-transferase	0	0	ko00480,ko00980,ko00982,ko00983,ko01524,ko05200,ko05204,ko05225,ko05418,map00480,map00980,map00982,map00983,map01524,map05200,map05204,map05225,map05418	GST_C,GST_C_2,GST_N,GST_N_3	Yes
Within-group	Bulk-R_Infected_vs_Control	MD12G1182100	Chr12	26185768	26186340	+	2.8143	-0.645978	6.57079	3.14895e-09	4.56632e-08	10.8498	NA	NA	0	0	NA	NA	No
Within-group	Bulk-R_Infected_vs_Control	MD06G1142200	Chr06	28584454	28587742	+	2.81179	2.06123	5.41619	5.00953e-07	3.59912e-06	5.808	purple acid phosphatase 27	Purple acid phosphatase	0	0	NA	Metallophos,Metallophos_C,Pur_ac_phosph_N	Yes
Within-group	Bulk-R_Infected_vs_Control	MD10G1216100	Chr10	31476083	31477346	+	2.80921	-1.4888	5.14938	1.52274e-06	9.3925e-06	5.0021	UDP-glucosyl transferase 88A1	Anthocyanidin 5,3-O-glucosyltransferase-like	0	0	NA	UDPGT	Yes
Within-group	Bulk-R_Infected_vs_Control	MD04G1245100	Chr04	32086167	32088962	-	2.80624	5.37775	6.83572	9.39041e-10	1.62204e-08	11.5089	isopentenyl diphosphate isomerase 1	Isopentenyl-diphosphate Delta-isomerase	0	0	ko00900,ko01100,ko01110,ko01130,map00900,map01100,map01110,map01130	NUDIX	Yes
Within-group	Bulk-R_Infected_vs_Control	MD06G1003000	Chr06	330608	331639	-	2.80503	-2.36716	5.96787	4.65781e-08	4.66098e-07	8.28182	Predicted AT-hook DNA-binding family protein	Transcription factor that specifically binds AT-rich DNA sequences related to the nuclear matrix attachment regions (MARs)	0	0	NA	DUF296	No
Within-group	Bulk-R_Infected_vs_Control	MD15G1049100	Chr15	3336626	3337950	+	2.80417	5.56072	6.48582	4.62764e-09	6.37079e-08	9.92464	Protein of unknown function	RNA binding	0	0	NA	NA	No
Within-group	Bulk-R_Infected_vs_Control	MD06G1003500	Chr06	408324	411699	+	2.80357	5.0904	6.79197	1.14786e-09	1.92513e-08	11.3622	NAD(P)-binding Rossmann-fold superfamily protein	Cinnamoyl-CoA reductase	0	0	NA	Epimerase	No
Within-group	Bulk-R_Infected_vs_Control	MD12G1175900	Chr12	25627960	25628441	-	2.80286	-2.88918	4.8826	4.50287e-06	2.42121e-05	4.00706	Barwin-related endoglucanase	EG45-like domain containing protein	0	0	NA	DPBB_1	Yes
Within-group	Bulk-R_Infected_vs_Control	MD15G1244700	Chr15	20185092	20185559	-	2.80212	2.24305	4.24796	5.23911e-05	0.000207977	1.39677	Chaperone DnaJ-domain superfamily protein	Chaperone protein DNAj	0	0	NA	DnaJ	No
Within-group	Bulk-R_Infected_vs_Control	MD12G1149000	Chr12	22901460	22903191	+	2.80154	-2.1044	4.25994	5.01086e-05	0.000200063	1.74864	senescence-associated gene 13	Tropinone reductase homolog	0	0	ko00960,ko01100,ko01110,map00960,map01100,map01110	adh_short,adh_short_C2	Yes
Within-group	Bulk-R_Infected_vs_Control	MD02G1198500	Chr02	19495017	19496075	-	2.80104	3.46398	6.93992	5.81298e-10	1.09021e-08	12.2391	alpha/beta-Hydrolases superfamily protein	carboxylesterase 8	0	0	NA	Abhydrolase_3	Yes
Within-group	Bulk-R_Infected_vs_Control	MD01G1175100	Chr01	27622553	27624565	+	2.80036	-1.15537	6.64109	2.28741e-09	3.47103e-08	11.1387	NA	NA	0	0	NA	NA	Yes
Within-group	Bulk-R_Infected_vs_Control	MD17G1284200	Chr17	34331058	34333052	-	2.79889	2.71158	7.01198	4.1674e-10	8.18602e-09	12.6541	Ca2+ activated outward rectifying K+ channel 5	Potassium channel	0	0	NA	Ion_trans_2	Yes
Within-group	Bulk-R_Infected_vs_Control	MD14G1002600	Chr14	384201	384953	+	2.79793	-0.848922	4.54667	1.68946e-05	7.67231e-05	2.72781	Methyltransferase-related protein	NA	0	0	NA	NA	Yes
Within-group	Bulk-R_Infected_vs_Control	MD15G1323700	Chr15	34470696	34473692	-	2.79736	3.61211	6.52882	3.80929e-09	5.37923e-08	10.3973	RAB GTPase homolog H1E	Ras-related protein	0	0	NA	Ras	Yes
Within-group	Bulk-R_Infected_vs_Control	MD01G1144800	Chr01	25502507	25503220	+	2.79702	-1.93755	4.75548	7.47021e-06	3.75857e-05	3.52635	ZCF37	NA	0	0	NA	NA	Yes
Within-group	Bulk-R_Infected_vs_Control	MD05G1044200	Chr05	7579574	7581442	-	2.79527	-3.36296	4.15497	7.38479e-05	0.000280909	1.42918	alpha/beta-Hydrolases superfamily protein	Alpha/beta hydrolase family	0	0	NA	Abhydrolase_1,Abhydrolase_6	Yes
Within-group	Bulk-R_Infected_vs_Control	MD15G1379500	Chr15	46703183	46707399	+	2.79405	2.50802	4.66004	1.08738e-05	5.21881e-05	2.86028	purine permease 3	purine permease	0	0	NA	PUNUT	Yes
Within-group	Bulk-R_Infected_vs_Control	MD01G1030600	Chr01	10844250	10846708	+	2.78928	1.53415	5.65202	1.83636e-07	1.51363e-06	6.88273	RAB GTPase homolog H1E	Ras-related protein	0	0	NA	Ras	Yes
Within-group	Bulk-R_Infected_vs_Control	MD17G1032000	Chr17	2327986	2330273	+	2.78913	-0.12533	2.95526	0.00398571	0.00914314	-2.34882	Pectin lyase-like superfamily protein	Polygalacturonase	0	0	ko00040,ko01100,map00040,map01100	Glyco_hydro_28	Yes
Within-group	Bulk-R_Infected_vs_Control	MD04G1139400	Chr04	22756386	22758195	+	2.78911	4.08048	4.77109	7.0227e-06	3.55442e-05	2.96773	glutathione S-transferase TAU 8	Belongs to the GST superfamily	0	0	ko00480,ko00980,ko00982,ko00983,ko01524,ko05200,ko05204,ko05225,ko05418,map00480,map00980,map00982,map00983,map01524,map05200,map05204,map05225,map05418	GST_C,GST_N,GST_N_3	Yes
Within-group	Bulk-R_Infected_vs_Control	MD16G1037600	Chr16	2701555	2703444	+	2.78721	-3.20265	5.34479	6.76247e-07	4.66979e-06	5.76863	Class I glutamine amidotransferase-like superfamily protein	Peptidase C26	0	0	NA	Peptidase_C26	No
Within-group	Bulk-R_Infected_vs_Control	MD16G1043200	Chr16	3041614	3043674	-	2.78508	4.20134	4.69779	9.37797e-06	4.59122e-05	2.6707	Homocysteine S-methyltransferase family protein	Homocysteine s-methyltransferase	0	0	ko00270,ko01100,ko01110,map00270,map01100,map01110	S-methyl_trans	Yes
Within-group	Bulk-R_Infected_vs_Control	MD07G1009600	Chr07	897356	898292	-	2.78307	0.305308	3.34268	0.00120945	0.00323668	-1.33027	NA	NA	0	0	NA	NA	No
Within-group	Bulk-R_Infected_vs_Control	MD17G1247900	Chr17	29687834	29688706	-	2.77839	0.518265	6.5114	4.12193e-09	5.77784e-08	10.588	Protein kinase superfamily protein	NA	0	0	NA	NA	Yes
Within-group	Bulk-R_Infected_vs_Control	MD15G1404800	Chr15	50567140	50569542	-	-2.93218	1.36957	-2.4374	0.0167559	0.0318932	-3.90575	CRINKLY4 related 4	Serine threonine-protein kinase-like protein	1	0	NA	Pkinase,Pkinase_Tyr,RCC1_2	No
Within-group	Bulk-R_Infected_vs_Control	MD06G1093600	Chr06	22476207	22476842	-	2.77545	3.98417	4.58123	1.47802e-05	6.82514e-05	2.2635	Late embryogenesis abundant (LEA) hydroxyproline-rich glycoprotein family	Late embryogenesis abundant protein	0	0	NA	LEA_2	Yes
Within-group	Bulk-R_Infected_vs_Control	MD03G1113000	Chr03	9933053	9935187	+	2.77495	5.24998	11.2183	8.52694e-19	4.59773e-16	32.1739	pyridoxine biosynthesis 2	pyridoxal biosynthesis protein	0	0	ko00750,map00750	SNO	Yes
Within-group	Bulk-R_Infected_vs_Control	MD15G1056800	Chr15	3811960	3814450	-	2.77342	3.11999	6.10234	2.57462e-08	2.79417e-07	8.57661	Putative lysine decarboxylase family protein	Cytokinin-activating enzyme working in the direct activation pathway. Phosphoribohydrolase that converts inactive cytokinin nucleotides to the biologically active free-base forms	0	0	NA	Lysine_decarbox	Yes
Within-group	Bulk-R_Infected_vs_Control	MD05G1185700	Chr05	31446518	31447565	-	2.77145	1.98989	3.46968	0.0008013	0.00226546	-1.14314	RmlC-like cupins superfamily protein	Protein of unknown function (DUF861)	0	0	NA	Cupin_3	No
Within-group	Bulk-R_Infected_vs_Control	MD03G1013200	Chr03	1039521	1041488	-	2.76814	-0.344095	3.02889	0.00320147	0.00754802	-2.14178	peroxidase 2	Belongs to the peroxidase family. Classical plant (class III) peroxidase subfamily	0	0	ko00940,ko01100,ko01110,map00940,map01100,map01110	peroxidase	No
Within-group	Bulk-R_Infected_vs_Control	MD05G1357600	Chr05	47328715	47329845	-	2.76734	-0.0109293	3.80011	0.000262366	0.000853415	0.0897858	MBOAT (membrane bound O-acyl transferase) family protein	Long-chain-alcohol O-fatty-acyltransferase-like	0	0	NA	MBOAT_2	Yes
Within-group	Bulk-R_Infected_vs_Control	MD01G1049600	Chr01	15238803	15239339	+	2.76707	1.53683	4.15888	7.27961e-05	0.000277495	1.09724	BON association protein 2	BON1-associated protein 2-like	0	0	NA	C2	Yes
Within-group	Bulk-R_Infected_vs_Control	MD04G1070300	Chr04	9619669	9626031	+	2.76702	3.73817	4.52025	1.87056e-05	8.39324e-05	2.08395	non-yellowing 1	Protein STAY-GREEN, chloroplastic-like	0	0	ko00860,ko01110,map00860,map01110	Staygreen	No
Within-group	Bulk-R_Infected_vs_Control	MD11G1118900	Chr11	10862547	10865047	+	2.76648	-3.16286	3.2849	0.00145376	0.00380272	-1.27383	laccase 17	Lignin degradation and detoxification of lignin-derived products	0	0	NA	Cu-oxidase,Cu-oxidase_2,Cu-oxidase_3	Yes
Within-group	Bulk-R_Infected_vs_Control	MD07G1208900	Chr07	28840396	28843261	+	2.76327	-0.419486	7.29281	1.12996e-10	2.70788e-09	14.0225	UDP-Glycosyltransferase superfamily protein	UDP-glycosyltransferase 76F1-like	0	0	ko00140,ko00380,ko00402,ko00830,ko00908,ko00980,ko01100,ko01110,ko04913,ko05204,map00140,map00380,map00402,map00830,map00908,map00980,map01100,map01110,map04913,map05204	UDPGT	Yes
Within-group	Bulk-R_Infected_vs_Control	MD14G1105700	Chr14	16432624	16434390	+	2.76245	-0.747544	3.56624	0.000582093	0.00171277	-0.549872	nine-cis-epoxycarotenoid dioxygenase 4	carotenoid cleavage dioxygenase 4	0	0	ko00906,ko01100,ko01110,map00906,map01100,map01110	RPE65	No
Within-group	Bulk-R_Infected_vs_Control	MD15G1074900	Chr15	5101927	5105142	+	2.76155	-1.95808	3.74948	0.000312615	0.000994074	0.0556182	Leucine-rich repeat protein kinase family protein	Belongs to the protein kinase superfamily. Ser Thr protein kinase family	0	0	ko04010,ko04064,ko04620,ko04624,ko04722,ko05133,ko05140,ko05142,ko05145,ko05152,ko05162,ko05169,map04010,map04064,map04620,map04624,map04722,map05133,map05140,map05142,map05145,map05152,map05162,map05169	LRRNT_2,LRR_1,LRR_8,Pkinase,Pkinase_Tyr	No
Within-group	Bulk-R_Infected_vs_Control	MD09G1096200	Chr09	6937429	6940491	+	2.76073	-3.60765	4.70519	9.10882e-06	4.47719e-05	3.35781	receptor kinase 3	serine threonine-protein kinase	0	0	NA	B_lectin,DUF3403,PAN_2,Pkinase,Pkinase_Tyr,S_locus_glycop	No
Within-group	Bulk-R_Infected_vs_Control	MD13G1007200	Chr13	466657	468452	+	2.76036	4.07299	5.9747	4.52018e-08	4.54434e-07	7.88018	S-adenosyl-L-methionine-dependent methyltransferases superfamily protein	SAM dependent carboxyl methyltransferase	0	0	NA	Methyltransf_7	Yes
Within-group	Bulk-R_Infected_vs_Control	MD15G1409700	Chr15	50923028	50925407	+	2.75819	4.74137	6.90233	6.91248e-10	1.26346e-08	11.8829	O-methyltransferase 1	Belongs to the class I-like SAM-binding methyltransferase superfamily. Cation-independent O- methyltransferase family	0	0	ko00940,ko01058,ko01100,ko01110,map00940,map01058,map01100,map01110	Dimerisation,Methyltransf_2	Yes
Within-group	Bulk-R_Infected_vs_Control	MD14G1246100	Chr14	32391359	32391742	-	2.75766	-3.8333	4.77123	7.01883e-06	3.55301e-05	3.60083	NA	NA	0	0	NA	NA	Yes
Within-group	Bulk-R_Infected_vs_Control	MD07G1071900	Chr07	6793089	6797715	-	2.75586	-3.26103	3.61919	0.000487374	0.00146282	-0.286156	Nucleotide-diphospho-sugar transferases superfamily protein	Glucomannan 4-beta-mannosyltransferase 9-like	0	0	NA	Glyco_tranf_2_3,Glyco_trans_2_3	No
Within-group	Bulk-R_Infected_vs_Control	MD15G1208900	Chr15	16754154	16757315	+	2.75199	-1.01514	4.92029	3.87015e-06	2.12143e-05	4.11977	basic helix-loop-helix (bHLH) DNA-binding family protein	transcription factor	0	0	NA	HLH	Yes
Within-group	Bulk-R_Infected_vs_Control	MD06G1173800	Chr06	31393747	31396730	+	2.75179	4.98753	5.06979	2.11056e-06	1.24691e-05	3.96381	similar to RCD one 5	inactive poly ADP-ribose polymerase	0	0	NA	PARP,RST	Yes
Within-group	Bulk-R_Infected_vs_Control	MD07G1198900	Chr07	27733100	27735615	-	2.75162	4.42913	6.34165	8.85915e-09	1.10782e-07	9.39152	Protein of unknown function (DUF506)	PDDEXK-like family of unknown function	0	0	NA	PDDEXK_6	Yes
Within-group	Bulk-R_Infected_vs_Control	MD02G1163100	Chr02	13910473	13911769	-	2.7511	4.73568	6.68254	1.89349e-09	2.97369e-08	10.8948	methyl esterase 10	Alpha/beta hydrolase family	0	0	NA	Abhydrolase_1,Abhydrolase_6	Yes
Within-group	Bulk-R_Infected_vs_Control	MD06G1211400	Chr06	34408574	34412775	-	2.75075	2.63003	2.7804	0.00660888	0.014202	-3.298	NAD(P)-binding Rossmann-fold superfamily protein	NmrA-like family	0	0	ko00941,ko01110,map00941,map01110	NmrA	Yes
Within-group	Bulk-R_Infected_vs_Control	MD02G1105200	Chr02	8537796	8538678	+	2.75039	-1.57779	4.77392	6.9444e-06	3.51809e-05	3.58673	lysine-ketoglutarate reductase/saccharopine dehydrogenase bifunctional enzyme	Alpha-aminoadipic semialdehyde	0	0	ko00300,ko00310,ko01100,ko01110,ko01130,ko01230,map00300,map00310,map01100,map01110,map01130,map01230	AlaDh_PNT_N,Saccharop_dh_N,Sacchrp_dh_C,Sacchrp_dh_NADP	No
Within-group	Bulk-R_Infected_vs_Control	MD01G1043900	Chr01	14271412	14277131	+	2.7462	-2.32089	4.33829	3.73782e-05	0.000154676	2.03679	AGAMOUS-like 21	MADS-box transcription factor	0	0	NA	K-box,SRF-TF	No
Within-group	Bulk-R_Infected_vs_Control	MD00G1054000	Chr00	10090947	10091552	+	2.7414	-3.54996	4.78402	6.67164e-06	3.39907e-05	3.64638	Protein of unknown function	Domain of unknown function (DUF4228)	0	0	NA	DUF4228	No
Within-group	Bulk-R_Infected_vs_Control	MD11G1002600	Chr11	231740	235662	+	2.73941	1.15858	6.90878	6.71019e-10	1.23345e-08	12.3267	Protein kinase superfamily protein	Belongs to the protein kinase superfamily	0	0	ko04010,ko04064,ko04620,ko04621,ko04624,ko04722,ko05133,ko05140,ko05142,ko05145,ko05152,ko05162,ko05164,map04010,map04064,map04620,map04621,map04624,map04722,map05133,map05140,map05142,map05145,map05152,map05162,map05164	Pkinase_Tyr	No
Within-group	Bulk-R_Infected_vs_Control	MD12G1182500	Chr12	26234464	26234976	+	2.73609	-2.45113	4.42139	2.73005e-05	0.000116767	2.3372	NA	NA	0	0	NA	NA	No
Within-group	Bulk-R_Infected_vs_Control	MD08G1186700	Chr08	23521393	23525953	+	2.73518	7.71892	6.62959	2.41034e-09	3.63381e-08	10.5224	Class-II DAHP synthetase family protein	Phospho-2-dehydro-3-deoxyheptonate aldolase	0	0	ko00400,ko01100,ko01110,ko01130,ko01230,ko02024,map00400,map01100,map01110,map01130,map01230,map02024	DAHP_synth_2	No
Within-group	Bulk-R_Infected_vs_Control	MD05G1081600	Chr05	17139832	17144726	-	2.73434	4.53703	6.88724	7.40987e-10	1.34435e-08	11.8294	fucosyltransferase 11	Glycoprotein 3-alpha-l-fucosyltransferase	0	0	ko00513,ko01100,map00513,map01100	Glyco_transf_10	No
Within-group	Bulk-R_Infected_vs_Control	MD05G1121400	Chr05	24407954	24408617	+	2.73305	1.88044	2.99089	0.00358641	0.00833351	-2.48068	Protein kinase protein with adenine nucleotide alpha hydrolases-like domain	serine threonine-protein kinase	0	0	ko04010,ko04064,ko04620,ko04621,ko04624,ko04722,ko05133,ko05140,ko05142,ko05145,ko05152,ko05162,ko05164,map04010,map04064,map04620,map04621,map04624,map04722,map05133,map05140,map05142,map05145,map05152,map05162,map05164	Pkinase	No
Within-group	Bulk-R_Infected_vs_Control	MD02G1260900	Chr02	31452409	31455903	+	2.73187	-0.736985	4.58012	1.48439e-05	6.8526e-05	2.84446	S-locus lectin protein kinase family protein	G-type lectin S-receptor-like serine threonine-protein kinase	0	0	NA	B_lectin,DUF3403,PAN_2,Pkinase_Tyr,S_locus_glycop	Yes
Within-group	Bulk-R_Infected_vs_Control	MD09G1254000	Chr09	32546579	32548263	+	2.73089	0.81427	5.01232	2.66741e-06	1.53388e-05	4.3583	S-adenosyl-L-methionine-dependent methyltransferases superfamily protein	NA	0	0	NA	NA	No
Within-group	Bulk-R_Infected_vs_Control	MD15G1332900	Chr15	36938076	36942984	+	2.7284	4.06664	7.87618	7.25952e-12	2.56958e-10	16.4949	shikimate kinase 1	Shikimate kinase	0	0	ko00400,ko01100,ko01110,ko01130,ko01230,map00400,map01100,map01110,map01130,map01230	SKI	No
Within-group	Bulk-R_Infected_vs_Control	MD13G1034200	Chr13	2416243	2418694	-	2.72792	-0.558955	5.51153	3.34637e-07	2.55455e-06	6.41578	B-box zinc finger family protein	ZINC FINGER protein	0	0	NA	CCT	No
Within-group	Bulk-R_Infected_vs_Control	MD01G1161300	Chr01	26661965	26664885	+	2.72685	3.65323	4.79544	6.37594e-06	3.27108e-05	3.13542	Transmembrane amino acid transporter family protein	sodium-coupled neutral amino acid transporter	0	0	NA	Aa_trans	Yes
Within-group	Bulk-R_Infected_vs_Control	MD10G1296800	Chr10	38446353	38449784	+	2.7254	2.79716	7.58806	2.83062e-11	8.14011e-10	15.2916	Protein kinase superfamily protein	Belongs to the protein kinase superfamily	0	0	NA	Pkinase,Pkinase_Tyr	Yes
Within-group	Bulk-R_Infected_vs_Control	MD03G1272500	Chr03	35591039	35594915	-	2.72527	0.911869	5.47406	3.92293e-07	2.92296e-06	6.18444	Major facilitator superfamily protein	Belongs to the major facilitator superfamily. Sugar transporter (TC 2.A.1.1) family	0	0	NA	Sugar_tr	No
Within-group	Bulk-R_Infected_vs_Control	MD09G1030800	Chr09	1878958	1882492	+	2.72363	2.01974	3.34018	0.00121918	0.00325854	-1.54579	monodehydroascorbate reductase 4	monodehydroascorbate reductase, cytoplasmic isoform 2	0	0	ko00053,ko01100,map00053,map01100	Pyr_redox_2	No
Within-group	Bulk-R_Infected_vs_Control	MD11G1107600	Chr11	9489487	9491713	+	2.72362	4.74813	6.40821	6.5681e-09	8.54408e-08	9.6364	O-Glycosyl hydrolases family 17 protein	Glucan endo-1,3-beta-glucosidase-like	0	0	NA	Glyco_hydro_17,X8	Yes
Within-group	Bulk-R_Infected_vs_Control	MD17G1249500	Chr17	29789849	29793592	-	2.7221	2.28487	7.17646	1.9433e-10	4.32986e-09	13.4745	S-locus lectin protein kinase family protein	Protein kinase domain	0	0	NA	Pkinase_Tyr	Yes
Within-group	Bulk-R_Infected_vs_Control	MD11G1262000	Chr11	37672704	37680349	-	2.72187	0.29481	3.11771	0.00244618	0.00597275	-1.95529	TRICHOME BIREFRINGENCE-LIKE 41	Protein trichome birefringence-like 41	0	0	NA	PC-Esterase,PMR5N	Yes
Within-group	Bulk-R_Infected_vs_Control	MD15G1218000	Chr15	17562593	17564951	+	2.72184	2.70184	6.74262	1.43894e-09	2.33463e-08	11.4501	Protein kinase superfamily protein	Serine threonine-protein kinase	0	0	ko04010,ko04064,ko04620,ko04621,ko04624,ko04722,ko05133,ko05140,ko05142,ko05145,ko05152,ko05162,ko05164,map04010,map04064,map04620,map04621,map04624,map04722,map05133,map05140,map05142,map05145,map05152,map05162,map05164	Pkinase,Pkinase_Tyr	No
Within-group	Bulk-R_Infected_vs_Control	MD09G1185100	Chr09	16027790	16030264	-	2.72183	2.40936	6.09033	2.71521e-08	2.92224e-07	8.6455	Nitrilase/cyanide hydratase and apolipoprotein N-acyltransferase family protein	Carbon-nitrogen hydrolase	0	0	ko00250,map00250	CN_hydrolase	No
Within-group	Bulk-R_Infected_vs_Control	MD04G1009800	Chr04	1105736	1109257	-	2.72132	5.54186	7.59006	2.804e-11	8.08511e-10	14.9517	purple acid phosphatase 15	Purple acid phosphatase	0	0	NA	Metallophos,Metallophos_C,Pur_ac_phosph_N	Yes
Within-group	Bulk-R_Infected_vs_Control	MD03G1005500	Chr03	449807	453415	-	2.72107	4.09799	7.30701	1.05745e-10	2.54923e-09	13.809	ACD1-like	Protochlorophyllide-dependent translocon component 52	0	0	NA	PaO,Rieske	Yes
Within-group	Bulk-R_Infected_vs_Control	MD03G1257100	Chr03	34442849	34443994	+	2.71708	-2.09356	4.55711	1.62266e-05	7.40534e-05	2.80796	calmodulin-like 11	Calmodulin-like protein	0	0	ko04014,ko04015,ko04016,ko04020,ko04022,ko04024,ko04070,ko04114,ko04218,ko04261,ko04270,ko04371,ko04626,ko04713,ko04720,ko04722,ko04728,ko04740,ko04744,ko04745,ko04750,ko04910,ko04912,ko04915,ko04916,ko04921,ko04922,ko04924,ko04925,ko04970,ko04971,ko05010,ko05031,ko05034,ko05133,ko05152,ko05167,ko05200,ko05214,ko05418,map04014,map04015,map04016,map04020,map04022,map04024,map04070,map04114,map0421…	EF-hand_1,EF-hand_5,EF-hand_7,EF-hand_8	Yes
Within-group	Bulk-R_Infected_vs_Control	MD03G1051400	Chr03	4110945	4114088	+	2.71669	-0.831125	3.69021	0.000383061	0.00118637	-0.18188	cinnamate-4-hydroxylase	Belongs to the cytochrome P450 family	0	0	ko00130,ko00360,ko00940,ko00941,ko00945,ko01100,ko01110,ko01220,map00130,map00360,map00940,map00941,map00945,map01100,map01110,map01220	p450	No
Within-group	Bulk-R_Infected_vs_Control	MD05G1329700	Chr05	45441637	45447371	+	2.71566	1.69107	6.43138	5.91714e-09	7.80396e-08	10.1644	S-locus lectin protein kinase family protein	G-type lectin S-receptor-like serine threonine-protein kinase	0	0	ko04010,ko04064,ko04620,ko04621,ko04624,ko04722,ko05133,ko05140,ko05142,ko05145,ko05152,ko05162,ko05164,map04010,map04064,map04620,map04621,map04624,map04722,map05133,map05140,map05142,map05145,map05152,map05162,map05164	B_lectin,DUF3403,PAN_2,Pkinase,Pkinase_Tyr,S_locus_glycop	No
Within-group	Bulk-R_Infected_vs_Control	MD13G1096000	Chr13	6771736	6782546	-	2.71461	5.28843	6.80816	1.06568e-09	1.80981e-08	11.383	cysteine-rich RLK (RECEPTOR-like protein kinase) 2	Cysteine-rich receptor-like protein kinase	0	0	NA	Pkinase,Pkinase_Tyr,Stress-antifung	Yes
Within-group	Bulk-R_Infected_vs_Control	MD07G1298200	Chr07	35785505	35788842	-	2.7145	5.4787	8.91248	5.16389e-14	4.0256e-12	21.198	CTC-interacting domain 12	Polyadenylate-binding protein-interacting protein	0	0	NA	PAM2,RRM_1	Yes
Within-group	Bulk-R_Infected_vs_Control	MD15G1284800	Chr15	25889690	25892943	-	2.71396	-0.438772	3.25107	0.00161752	0.00417072	-1.55675	alpha/beta-Hydrolases superfamily protein	triglyceride lipase activity	0	0	NA	Lipase_3	Yes
Within-group	Bulk-R_Infected_vs_Control	MD14G1126800	Chr14	20152604	20155833	+	2.71221	8.31779	7.21773	1.60365e-10	3.65875e-09	13.212	methionine gamma-lyase	Methionine gamma-lyase-like	0	0	ko00270,ko00450,map00270,map00450	Cys_Met_Meta_PP	No
Within-group	Bulk-R_Infected_vs_Control	MD02G1130000	Chr02	10483594	10485749	+	2.71187	-2.21857	3.43619	0.000894063	0.00249373	-0.878807	Major facilitator superfamily protein	Nodulin-like	0	0	NA	Nodulin-like	No
Within-group	Bulk-R_Infected_vs_Control	MD09G1147600	Chr09	11617690	11620702	+	2.71098	-3.86196	5.42359	4.85553e-07	3.50717e-06	6.07018	NAC domain containing protein 42	Transcription factor JUNGBRUNNEN 1-like	0	0	NA	NAM	No
Within-group	Bulk-R_Infected_vs_Control	MD06G1081300	Chr06	19934610	19937046	+	2.70822	9.11369	10.4176	3.81209e-17	1.07242e-14	28.371	glutathione peroxidase 6	Belongs to the glutathione peroxidase family	0	0	ko00480,ko00590,ko04918,map00480,map00590,map04918	GSHPx	Yes
Within-group	Bulk-R_Infected_vs_Control	MD14G1183300	Chr14	27579870	27581927	-	2.70784	0.398176	2.40303	0.0183084	0.0344048	-3.81163	ARM repeat superfamily protein	RING-type E3 ubiquitin transferase	0	0	NA	Arm,U-box	No
Within-group	Bulk-R_Infected_vs_Control	MD00G1146900	Chr00	32152762	32158579	-	2.70683	-2.42879	4.78499	6.64609e-06	3.38765e-05	3.64196	cellulose synthase 6	Belongs to the glycosyltransferase 2 family. Plant cellulose synthase subfamily	0	0	NA	Cellulose_synt,zf-UDP	No
Within-group	Bulk-R_Infected_vs_Control	MD01G1213600	Chr01	30680906	30687318	-	2.7064	7.31205	10.0032	2.76144e-16	5.69033e-14	26.3662	multidrug resistance-associated protein 14	ABC transporter C family member	0	0	ko01523,ko01524,ko02010,ko04976,map01523,map01524,map02010,map04976	ABC_membrane,ABC_tran	Yes
Within-group	Bulk-R_Infected_vs_Control	MD07G1268400	Chr07	33596978	33600556	-	2.70517	6.73134	9.05559	2.59932e-14	2.32513e-12	21.8379	Cytochrome b561/ferric reductase transmembrane protein family	transmembrane ascorbate ferrireductase	0	0	NA	Cytochrom_B561	Yes
Within-group	Bulk-R_Infected_vs_Control	MD15G1060800	Chr15	4091781	4092389	+	2.70135	-0.205883	3.87949	0.000198772	0.000667359	0.379911	PYR1-like 2	Abscisic acid receptor	0	0	ko04016,ko04075,map04016,map04075	Polyketide_cyc2	No
Within-group	Bulk-R_Infected_vs_Control	MD14G1202100	Chr14	29091742	29093946	-	2.70095	-0.499796	3.21707	0.00179933	0.00457857	-1.64183	expansin A15	Belongs to the expansin family	0	0	NA	DPBB_1,Pollen_allerg_1	Yes
Within-group	Bulk-R_Infected_vs_Control	MD11G1305700	Chr11	42043639	42046073	+	2.69913	2.67067	5.55203	2.81663e-07	2.20212e-06	6.29866	thiamin pyrophosphokinase1	Belongs to the thiamine pyrophosphokinase family	0	0	ko00730,ko01100,map00730,map01100	TPK_B1_binding,TPK_catalytic	Yes
Within-group	Bulk-R_Infected_vs_Control	MD15G1344600	Chr15	40155144	40155740	+	2.69166	4.83736	5.59421	2.35259e-07	1.87836e-06	6.12669	Protein of unknown function	BEST Arabidopsis thaliana protein match is hydroxyproline-rich glycoprotein family protein (TAIR AT1G21695.1)	0	0	NA	DUF688	Yes
Within-group	Bulk-R_Infected_vs_Control	MD02G1152500	Chr02	12604594	12606741	-	2.69056	-2.2606	3.33162	0.00125298	0.00333606	-1.1907	homeobox protein 40	Homeobox-leucine zipper protein	0	0	NA	Homeobox	No
Within-group	Bulk-R_Infected_vs_Control	MD07G1210900	Chr07	28972627	28973039	-	2.69006	0.243118	6.33206	9.24869e-09	1.14861e-07	9.82279	Protein of unknown function (DUF620)	Protein of unknown function (DUF620)	0	0	NA	DUF620	No
Within-group	Bulk-R_Infected_vs_Control	MD06G1112000	Chr06	25053642	25056504	-	2.68944	4.80807	4.05576	0.000105982	0.00038538	0.254093	Nodulin MtN3 family protein	Mediates both low-affinity uptake and efflux of sugar across the membrane	0	0	NA	MtN3_slv	Yes
Within-group	Bulk-R_Infected_vs_Control	MD08G1073100	Chr08	5908697	5910713	+	2.68884	-3.59482	4.12347	8.28679e-05	0.000310798	1.32417	Protein kinase superfamily protein	Serine threonine-protein kinase	0	0	NA	Pkinase,Pkinase_Tyr	No
Within-group	Bulk-R_Infected_vs_Control	MD01G1217700	Chr01	31019484	31028094	-	2.68827	1.75383	5.41156	5.10829e-07	3.6587e-06	5.84831	Protein of unknown function	NA	0	0	NA	NA	Yes
Within-group	Bulk-R_Infected_vs_Control	MD03G1064100	Chr03	5142593	5144741	+	2.68656	-3.11737	3.79258	0.000269319	0.000872783	0.247652	Acyl-CoA N-acyltransferases (NAT) superfamily protein	N-acetyltransferase	0	0	NA	Acetyltransf_1	No
Within-group	Bulk-R_Infected_vs_Control	MD10G1157900	Chr10	24653893	24656125	-	-2.84369	-2.5725	-3.23527	0.00169975	0.00435637	-1.5019	cytochrome P450	Cytochrome p450	1	0	ko00904,map00904	p450	No
Within-group	Bulk-R_Infected_vs_Control	MD14G1018700	Chr14	1759644	1763364	+	2.68519	8.70902	8.35149	7.56829e-13	3.77272e-11	18.5236	monodehydroascorbate reductase 1	Monodehydroascorbate	0	0	ko00053,ko01100,map00053,map01100	Pyr_redox_2	Yes
Within-group	Bulk-R_Infected_vs_Control	MD05G1104700	Chr05	21744316	21744513	-	2.68448	-0.840968	5.13658	1.60509e-06	9.81621e-06	4.93557	Protein of unknown function	NA	0	0	NA	NA	Yes
Within-group	Bulk-R_Infected_vs_Control	MD01G1194700	Chr01	29342987	29344698	+	2.68447	7.04449	6.98559	4.70803e-10	9.1171e-09	12.124	GroES-like zinc-binding alcohol dehydrogenase family protein	Sorbitol dehydrogenase-like	0	0	ko00040,ko00051,ko01100,map00040,map00051,map01100	ADH_N,ADH_zinc_N	No
Within-group	Bulk-R_Infected_vs_Control	MD01G1038700	Chr01	13449306	13453788	+	2.68367	-0.806981	6.1446	2.13484e-08	2.37586e-07	9.02981	GDP dissociation inhibitor family protein / Rab GTPase activator family protein	Guanosine nucleotide diphosphate dissociation inhibitor	0	0	NA	GDI	No
Within-group	Bulk-R_Infected_vs_Control	MD13G1056800	Chr13	3975036	3978319	+	2.68348	1.4579	4.6634	1.07318e-05	5.16197e-05	2.96747	ACT domain repeat 4	ACT domain	0	0	NA	ACT,ACT_6	No
Within-group	Bulk-R_Infected_vs_Control	MD02G1100600	Chr02	8019656	8024233	-	2.68152	2.01837	4.83578	5.43004e-06	2.85507e-05	3.58842	sucrose synthase 4	Sucrose-cleaving enzyme that provides UDP-glucose and fructose for various metabolic pathways	0	0	ko00500,ko01100,map00500,map01100	Glycos_transf_1,Sucrose_synth	Yes
Within-group	Bulk-R_Infected_vs_Control	MD02G1175300	Chr02	15406424	15407050	-	2.67882	-3.11999	3.38035	0.00107155	0.00290976	-1.0082	HXXXD-type acyl-transferase family protein	acetyltransferase At3g50280-like	0	0	NA	Transferase	No
Within-group	Bulk-R_Infected_vs_Control	MD06G1219100	Chr06	35163973	35166635	-	2.67556	-0.267233	3.37774	0.00108058	0.00293131	-1.14691	Protein kinase superfamily protein	Serine threonine-protein kinase	0	0	ko04010,ko04064,ko04620,ko04621,ko04624,ko04722,ko05133,ko05140,ko05142,ko05145,ko05152,ko05162,ko05164,map04010,map04064,map04620,map04621,map04624,map04722,map05133,map05140,map05142,map05145,map05152,map05162,map05164	GUB_WAK_bind,Pkinase,Pkinase_Tyr,WAK_assoc	No
Within-group	Bulk-R_Infected_vs_Control	MD17G1009200	Chr17	584507	586602	+	2.67409	4.66599	6.04408	3.33066e-08	3.4883e-07	8.0853	GRAM domain family protein	GEM-like protein	0	0	NA	GRAM	Yes
Within-group	Bulk-R_Infected_vs_Control	MD06G1147300	Chr06	28945718	28948814	+	2.67394	-3.25686	4.07643	9.83394e-05	0.000360875	1.16423	AMP-dependent synthetase and ligase family protein	4-coumarate--CoA ligase-like 9	0	0	NA	AMP-binding,AMP-binding_C	No
Within-group	Bulk-R_Infected_vs_Control	MD05G1340800	Chr05	46124184	46127590	+	2.67376	1.89029	3.97222	0.000143084	0.000500979	0.502293	Protein of unknown function	isoform X1	0	0	NA	NA	No
Within-group	Bulk-R_Infected_vs_Control	MD03G1234100	Chr03	31973598	31975844	-	-2.82771	-1.6886	-3.64377	0.000448546	0.00136114	-0.339317	Concanavalin A-like lectin protein kinase family protein	L-type lectin-domain containing receptor kinase IX.1-like	1	0	ko04010,ko04064,ko04620,ko04621,ko04624,ko04722,ko05133,ko05140,ko05142,ko05145,ko05152,ko05162,ko05164,map04010,map04064,map04620,map04621,map04624,map04722,map05133,map05140,map05142,map05145,map05152,map05162,map05164	Lectin_legB,Pkinase	No
Within-group	Bulk-R_Infected_vs_Control	MD07G1238800	Chr07	31049651	31054087	-	2.67157	-0.0981546	3.32661	0.00127321	0.00338185	-1.35484	cytochrome P450	Belongs to the cytochrome P450 family	0	0	NA	p450	No
Within-group	Bulk-R_Infected_vs_Control	MD12G1154700	Chr12	23502605	23503339	+	2.67141	-1.72643	4.02741	0.000117397	0.000421301	0.956662	NA	NA	0	0	NA	NA	Yes
Within-group	Bulk-R_Infected_vs_Control	MD01G1231600	Chr01	32041962	32042288	-	2.66894	4.21951	3.55473	0.00060489	0.00177131	-1.29528	response to low sulfur 2	cellular response to sulfur starvation	0	0	NA	NA	Yes
Within-group	Bulk-R_Infected_vs_Control	MD10G1330600	Chr10	40886401	40887487	-	2.66834	0.814151	2.77345	0.00674031	0.0144498	-2.95575	Protein of unknown function (DUF506)	PDDEXK-like family of unknown function	0	0	NA	PDDEXK_6	No
Within-group	Bulk-R_Infected_vs_Control	MD11G1293900	Chr11	41305280	41307736	+	2.66819	1.71133	5.28186	8.79656e-07	5.84246e-06	5.32006	histidine-containing phosphotransmitter 2	phosphotransfer protein	0	0	ko04075,map04075	Hpt	Yes
Within-group	Bulk-R_Infected_vs_Control	MD12G1182900	Chr12	26299010	26300651	+	2.66813	2.42843	4.70786	9.01371e-06	4.43448e-05	2.9941	Protein of unknown function (DUF567)	LURP-one-related	0	0	NA	LOR	Yes
Within-group	Bulk-R_Infected_vs_Control	MD11G1283200	Chr11	40149031	40149747	+	2.66733	-3.56356	3.7213	0.000344409	0.00108104	0.0280089	ovate family protein 12	Transcriptional repressor, ovate	0	0	NA	Ovate	No
Within-group	Bulk-R_Infected_vs_Control	MD03G1267600	Chr03	35258515	35263848	-	2.66709	-1.12781	7.2148	1.62568e-10	3.6986e-09	13.6576	Phenazine biosynthesis PhzC/PhzF protein	Phenazine biosynthesis-like domain-containing protein	0	0	NA	PhzC-PhzF	Yes
Within-group	Bulk-R_Infected_vs_Control	MD11G1274100	Chr11	39076792	39080376	-	2.66373	6.63844	9.6678	1.37742e-15	2.102e-13	24.7638	cytochrome P450	Belongs to the cytochrome P450 family	0	0	ko00908,ko01100,ko01110,ko04726,map00908,map01100,map01110,map04726	p450	Yes
Within-group	Bulk-R_Infected_vs_Control	MD15G1169100	Chr15	13036569	13038091	+	2.66202	0.687277	3.27221	0.00151325	0.0039386	-1.58656	indole-3-acetic acid inducible 29	Aux IAA proteins are short-lived transcriptional factors that function as repressors of early auxin response genes at low auxin concentrations	0	0	ko04075,map04075	AUX_IAA	Yes
Within-group	Bulk-R_Infected_vs_Control	MD05G1298200	Chr05	43165049	43167895	+	2.66104	-3.30428	4.36704	3.35409e-05	0.000140432	2.15339	O-fucosyltransferase family protein	protein At1g04910-like isoform X1	0	0	NA	O-FucT	No
Within-group	Bulk-R_Infected_vs_Control	MD15G1193400	Chr15	15243418	15246959	+	2.66036	5.72159	7.56	3.23007e-11	9.15054e-10	14.8082	sugar transporter 14	Belongs to the major facilitator superfamily. Sugar transporter (TC 2.A.1.1) family	0	0	NA	Sugar_tr	No
Within-group	Bulk-R_Infected_vs_Control	MD07G1300700	Chr07	35947665	35950972	-	2.65974	-3.19884	4.1188	8.4294e-05	0.000315488	1.30743	O-methyltransferase 1	Belongs to the class I-like SAM-binding methyltransferase superfamily. Cation-independent O- methyltransferase family	0	0	ko00940,ko00950,ko01100,ko01110,map00940,map00950,map01100,map01110	Dimerisation,Methyltransf_2	No
Within-group	Bulk-R_Infected_vs_Control	MD10G1152400	Chr10	23933708	23935300	+	2.65929	-1.20071	4.53647	1.75721e-05	7.94651e-05	2.71307	serine-rich protein-related	NA	0	0	NA	NA	No
Within-group	Bulk-R_Infected_vs_Control	MD07G1188700	Chr07	26945274	26948322	+	2.65749	-1.18661	4.07331	9.94573e-05	0.000364193	1.08542	alpha/beta-Hydrolases superfamily protein	Caffeoylshikimate esterase-like	0	0	ko00561,ko01100,ko04714,ko04723,ko04923,map00561,map01100,map04714,map04723,map04923	Hydrolase_4	No
Within-group	Bulk-R_Infected_vs_Control	MD17G1281200	Chr17	34087607	34089657	+	2.65567	5.64168	6.60212	2.7312e-09	4.03837e-08	10.4276	tolB protein-related	WD40-like Beta Propeller Repeat	0	0	NA	DPPIV_N,PD40	Yes
Within-group	Bulk-R_Infected_vs_Control	MD04G1004400	Chr04	573919	576047	-	2.65541	-1.34566	5.16974	1.40018e-06	8.73398e-06	5.0783	ARM repeat superfamily protein	ribosomal protein import into nucleus	0	0	NA	NA	No
Within-group	Bulk-R_Infected_vs_Control	MD07G1249800	Chr07	31865550	31866680	-	2.65445	-0.908649	4.03271	0.000115178	0.00041421	0.934817	U-box domain-containing protein kinase family protein	U-box domain-containing protein	0	0	NA	Pkinase,Pkinase_Tyr,U-box,Usp	Yes
Within-group	Bulk-R_Infected_vs_Control	MD03G1082700	Chr03	6710930	6714579	-	2.65265	2.83639	4.6018	1.36463e-05	6.35869e-05	2.5459	Protein of unknown function	NA	0	0	NA	NA	No
Within-group	Bulk-R_Infected_vs_Control	MD03G1095100	Chr03	8067586	8069661	+	2.65248	3.25716	5.98768	4.26958e-08	4.33143e-07	8.02957	ENTH/VHS family protein	ENTH domain	0	0	ko04144,map04144	ENTH	Yes
Within-group	Bulk-R_Infected_vs_Control	MD15G1277800	Chr15	24490419	24492004	+	2.65239	-0.120274	3.86455	0.000209489	0.000698484	0.341983	Disease resistance protein (CC-NBS-LRR class) family	disease resistance	0	0	ko04014,map04014	NB-ARC,RPW8	No
Within-group	Bulk-R_Infected_vs_Control	MD16G1141400	Chr16	10898811	10901795	-	2.6512	5.20698	9.94025	3.73243e-16	7.23063e-14	26.1261	Sec14p-like phosphatidylinositol transfer family protein	Random slug protein 5-like	0	0	NA	CRAL_TRIO,CRAL_TRIO_N	No
Within-group	Bulk-R_Infected_vs_Control	MD04G1238700	Chr04	31696306	31698689	+	2.6511	2.95602	3.75422	0.000307542	0.000979676	-0.402995	wall associated kinase-like 1	wall-associated receptor kinase-like	0	0	NA	LysM,Pkinase,Pkinase_Tyr	Yes
Within-group	Bulk-R_Infected_vs_Control	MD10G1073900	Chr10	10417397	10427055	+	2.65108	6.25967	10.1554	1.33312e-16	3.08064e-14	27.0906	Adenine nucleotide alpha hydrolases-like superfamily protein	Universal stress protein family	0	0	NA	Usp	Yes
Within-group	Bulk-R_Infected_vs_Control	MD16G1054800	Chr16	3871263	3874513	+	2.64889	-2.7281	3.12119	0.00242026	0.00591973	-1.74859	DNA glycosylase superfamily protein	Methyladenine glycosylase	0	0	ko03410,map03410	Adenine_glyco	No
Within-group	Bulk-R_Infected_vs_Control	MD05G1224100	Chr05	35678670	35681650	+	2.64133	-0.667967	3.86033	0.000212614	0.00070788	0.321238	myb domain protein 58	Myb-related protein	0	0	NA	Myb_DNA-binding	Yes
Within-group	Bulk-R_Infected_vs_Control	MD17G1249800	Chr17	29858691	29864775	-	2.63942	2.99702	6.60766	2.66327e-09	3.96269e-08	10.8434	S-locus lectin protein kinase family protein	G-type lectin S-receptor-like serine threonine-protein kinase	0	0	NA	Pkinase_Tyr,Thaumatin	No
Within-group	Bulk-R_Infected_vs_Control	MD13G1195800	Chr13	17044095	17047905	-	2.63898	-2.48861	3.53283	0.00065057	0.00188765	-0.587552	pinoresinol reductase 1	Isoflavone reductase homolog	0	0	NA	NmrA	No
Within-group	Bulk-R_Infected_vs_Control	MD04G1120800	Chr04	20732624	20733037	+	2.63767	-3.55567	3.95393	0.000152723	0.000530139	0.767936	Histone superfamily protein	NA	0	0	NA	NA	No
Within-group	Bulk-R_Infected_vs_Control	MD05G1323400	Chr05	45055359	45056077	+	2.63521	1.55148	4.88503	4.45914e-06	2.40197e-05	3.78492	NA	NA	0	0	NA	NA	Yes
Within-group	Bulk-R_Infected_vs_Control	MD08G1117200	Chr08	10729843	10731898	+	2.63449	1.99114	6.60309	2.71918e-09	4.02613e-08	10.9238	Tetraspanin family protein	Aspartate aminotransferase	0	0	ko00220,ko00250,ko00270,ko00330,ko00350,ko00360,ko00400,ko00710,ko00950,ko00960,ko01100,ko01110,ko01120,ko01130,ko01200,ko01210,ko01230,map00220,map00250,map00270,map00330,map00350,map00360,map00400,map00710,map00950,map00960,map01100,map01110,map01120,map01130,map01200,map01210,map01230	Aminotran_1_2	No
Within-group	Bulk-R_Infected_vs_Control	MD06G1052300	Chr06	7542395	7543510	-	2.63347	1.35215	4.59704	1.39009e-05	6.46245e-05	2.75417	carboxyesterase 20	Carboxylesterase 1-like	0	0	NA	Abhydrolase_3	Yes
Within-group	Bulk-R_Infected_vs_Control	MD05G1319800	Chr05	44733185	44734948	+	2.63229	-0.0709925	2.70649	0.00813257	0.0170052	-3.02386	Polyphenol oxidase	Polyphenol oxidase	0	0	ko00350,ko00950,ko01100,ko01110,map00350,map00950,map01100,map01110	PPO1_DWL,PPO1_KFDV,Tyrosinase	No
Within-group	Bulk-R_Infected_vs_Control	MD16G1059300	Chr16	4235180	4237091	+	2.63078	1.02643	6.17664	1.85161e-08	2.098e-07	9.12317	cytochrome B5 isoform A	cytochrome	0	0	NA	Cyt-b5	Yes
Within-group	Bulk-R_Infected_vs_Control	MD02G1233600	Chr02	27991381	27992004	-	2.63011	-0.349144	4.78604	6.6184e-06	3.37713e-05	3.57856	NA	receptor-like protein kinase	0	0	NA	GUB_WAK_bind,Pkinase,Pkinase_Tyr	Yes
Within-group	Bulk-R_Infected_vs_Control	MD07G1070000	Chr07	6630706	6631329	-	2.63011	-0.349144	4.78604	6.6184e-06	3.37713e-05	3.57856	NA	receptor-like protein kinase	0	0	NA	GUB_WAK_bind,Pkinase,Pkinase_Tyr	Yes
Within-group	Bulk-R_Infected_vs_Control	MD09G1132200	Chr09	10161146	10165904	-	2.62897	-1.85177	3.62629	0.000475839	0.0014331	-0.321656	Subtilisin-like serine endopeptidase family protein	subtilisin-like protease	0	0	NA	Inhibitor_I9,PA,Peptidase_S8	No
Within-group	Bulk-R_Infected_vs_Control	MD11G1222500	Chr11	32577497	32580056	+	2.62857	5.00517	8.07082	2.88221e-12	1.15833e-10	17.2442	Ras-related small GTP-binding family protein	Septum-promoting GTP-binding protein	0	0	ko04111,map04111	Ras	No
Within-group	Bulk-R_Infected_vs_Control	MD05G1314900	Chr05	44469387	44470663	-	-2.81681	2.54896	-3.63908	0.000455721	0.00137957	-0.795465	CBS domain-containing protein	CBS domain-containing protein CBSX5-like	1	0	NA	CBS	No
Within-group	Bulk-R_Infected_vs_Control	MD14G1209700	Chr14	29565178	29567000	-	2.62766	1.85851	3.84509	0.000224275	0.000741593	0.0213015	UDP-glucose 6-dehydrogenase family protein	UDP-glucose 6-dehydrogenase	0	0	ko00040,ko00053,ko00520,ko01100,map00040,map00053,map00520,map01100	UDPG_MGDP_dh,UDPG_MGDP_dh_C,UDPG_MGDP_dh_N	No
Within-group	Bulk-R_Infected_vs_Control	MD05G1068000	Chr05	12966082	12967655	+	2.62533	0.453915	2.62091	0.0102916	0.0208618	-3.27122	unknown seed protein like 1	BURP domain-containing protein	0	0	NA	BURP	No
Within-group	Bulk-R_Infected_vs_Control	MD09G1286100	Chr09	36475230	36484725	-	2.62522	-1.68135	4.04326	0.000110875	0.000400561	1.00682	AMP-dependent synthetase and ligase family protein	Long chain acyl-CoA synthetase	0	0	ko00061,ko00071,ko01100,ko01212,ko02024,ko03320,ko04146,ko04216,ko04714,ko04920,map00061,map00071,map01100,map01212,map02024,map03320,map04146,map04216,map04714,map04920	AMP-binding	Yes
Within-group	Bulk-R_Infected_vs_Control	MD01G1065600	Chr01	16936127	16941633	+	2.62486	6.14763	4.53255	1.78398e-05	8.05292e-05	1.81937	cysteine synthase C1	Belongs to the cysteine synthase cystathionine beta- synthase family	0	0	ko00270,ko00460,ko00920,ko01100,ko01110,ko01120,ko01130,ko01200,ko01230,map00270,map00460,map00920,map01100,map01110,map01120,map01130,map01200,map01230	PALP	Yes
Within-group	Bulk-R_Infected_vs_Control	MD04G1242300	Chr04	31891397	31892980	+	2.62467	-2.26158	3.71839	0.000347865	0.00109073	-0.016759	Leucine-rich repeat (LRR) family protein	LRR receptor-like serine threonine-protein kinase	0	0	NA	LRRNT_2,LRR_1,LRR_4,LRR_6,LRR_8	Yes
Within-group	Bulk-R_Infected_vs_Control	MD14G1154500	Chr14	24914608	24915904	+	2.62304	1.78288	4.01184	0.000124154	0.000442409	0.625349	WRKY DNA-binding protein 45	WRKY Transcription Factor	0	0	NA	WRKY	Yes
Within-group	Bulk-R_Infected_vs_Control	MD10G1078000	Chr10	11106670	11108023	+	2.62203	3.64116	6.34304	8.8043e-09	1.10146e-07	9.54576	unknown seed protein like 1	BURP domain-containing protein	0	0	NA	BURP	No
Within-group	Bulk-R_Infected_vs_Control	MD03G1120600	Chr03	11201646	11206237	-	2.62201	0.243917	6.03239	3.50689e-08	3.64807e-07	8.53867	cyclic nucleotide-gated channel 15	cyclic nucleotide-gated ion channel	0	0	ko04626,map04626	Ion_trans,cNMP_binding	Yes
Within-group	Bulk-R_Infected_vs_Control	MD05G1349200	Chr05	46722075	46723343	-	2.62179	-3.35728	3.61744	0.000490251	0.00147007	-0.282152	F-box family protein with a domain of unknown function (DUF295)	f-box protein	0	0	NA	Chloroplast_duf	Yes
Within-group	Bulk-R_Infected_vs_Control	MD01G1177000	Chr01	27769205	27770209	+	2.62129	2.10779	4.94016	3.57237e-06	1.97899e-05	3.92591	ethylene responsive element binding factor 1	ethylene-responsive transcription factor	0	0	ko04075,ko04626,map04075,map04626	AP2	Yes
Within-group	Bulk-R_Infected_vs_Control	MD03G1186100	Chr03	25354730	25358156	-	2.61955	0.802336	4.38611	3.12091e-05	0.000131743	2.01558	S-locus lectin protein kinase family protein	G-type lectin S-receptor-like serine threonine-protein kinase	0	0	NA	B_lectin,DUF3403,PAN_2,Pkinase,Pkinase_Tyr,S_locus_glycop	Yes
Within-group	Bulk-R_Infected_vs_Control	MD14G1105800	Chr14	16449207	16454543	-	2.6192	1.19894	7.05095	3.4797e-10	7.03155e-09	12.9556	Protein of unknown function (DUF3741)	Protein of unknown function (DUF3741)	0	0	NA	DUF3741,DUF4378	Yes
Within-group	Bulk-R_Infected_vs_Control	MD13G1025500	Chr13	1828706	1830159	-	2.61914	-1.23335	4.36153	3.42455e-05	0.000143171	2.07918	proline-rich family protein	NA	0	0	NA	NA	No
Within-group	Bulk-R_Infected_vs_Control	MD01G1228800	Chr01	31842732	31848051	+	2.61797	5.69925	5.83417	8.35537e-08	7.67063e-07	7.06058	2-oxoglutarate (2OG) and Fe(II)-dependent oxygenase superfamily protein	Belongs to the iron ascorbate-dependent oxidoreductase family	0	0	NA	2OG-FeII_Oxy,DIOX_N	No
[truncated: 19,903 more rows]

## Sheet: Table S2
Supplementary Table 2: Ten transcripts differentially expressed in partially resistant genotypes upon infection (‘Bulk-R Infected vs Control’) and differing in abundance between resistant and susceptible genotypes under infection (‘Infected: Bulk-R vs Bulk-S’).
[truncated: 12 more rows]

[truncated: 10 more sheets: Table S3, Table S4, Table S5, Table S6, Table S7, Table S8, Table S9, Table S10, Table S11, Supplementary figure 1]
